# Supplementary material for: Structural constraint at a P–P bond: phosphinophosphination of alkenes, alkynes, and carbonyls by a concerted mechanism
Source: Royal Society of Chemistry journal article supplement (doi:10.1039/d4sc06581f), 2024-11-05
Supplement: d4sc06581f1.pdf [file d4sc06581f1.pdf]

## Contents

|                                                                                             |           |
|---------------------------------------------------------------------------------------------|-----------|
| <b>1. General Information .....</b>                                                         | <b>3</b>  |
| <b>2. Syntheses of Phosphenium Salts .....</b>                                              | <b>4</b>  |
| <b>2.1 Preparation of 1 (PNOPCl) .....</b>                                                  | <b>4</b>  |
| <b>2.2 Preparation of 2a ([PNOP][B(C<sub>6</sub>F<sub>5</sub>)<sub>4</sub>]) .....</b>      | <b>7</b>  |
| <b>2.3 Preparation of 2b ([PNOP][Al(OC(CF<sub>3</sub>)<sub>3</sub>)<sub>4</sub>]) .....</b> | <b>11</b> |
| <b>3. Phosphinophosphination of Alkynes.....</b>                                            | <b>14</b> |
| <b>3.1 Possible diastereomers for the reaction product .....</b>                            | <b>14</b> |
| <b>3.2 Preparation of 3 .....</b>                                                           | <b>15</b> |
| <b>4. Phosphinophosphination of Alkenes.....</b>                                            | <b>27</b> |
| <b>4.1 Reaction development .....</b>                                                       | <b>27</b> |
| <b>4.2 Preparation of 4 .....</b>                                                           | <b>30</b> |
| <b>5. Phosphinophosphination of Benzaldehyde .....</b>                                      | <b>52</b> |
| <b>5.1 Reaction development .....</b>                                                       | <b>52</b> |
| <b>5.2 Preparation of 5 .....</b>                                                           | <b>56</b> |
| <b>6. Phosphinophosphination of Ketones .....</b>                                           | <b>61</b> |
| <b>7. Coordination Chemistry .....</b>                                                      | <b>69</b> |
| <b>7.1 Steric profiles .....</b>                                                            | <b>69</b> |
| <b>7.2 Reaction development .....</b>                                                       | <b>70</b> |
| <b>8. Optical Properties of Select Compounds .....</b>                                      | <b>74</b> |
| <b>9. X-Ray Diffraction .....</b>                                                           | <b>75</b> |
| <b>9.1 Bond angles profile .....</b>                                                        | <b>76</b> |

---

|                                                |            |
|------------------------------------------------|------------|
| <b>9.2 X-ray crystallography .....</b>         | <b>77</b>  |
| <b>10. Computational Details .....</b>         | <b>95</b>  |
| <b>10.1 Free energy reaction profiles.....</b> | <b>96</b>  |
| <b>10.2 xyz coordinates .....</b>              | <b>99</b>  |
| <b>11. References.....</b>                     | <b>162</b> |

---

## 1. General Information

Unless stated otherwise, manipulations were carried out under a dry argon atmosphere by using standard Schlenk techniques to prevent oxidation and hydrolysis of sensitive compounds. All solvents were rigorously dried by applying standard procedures, freshly degassed and stored over molecular sieve (3 Å resp. 4 Å) for at least two days prior to use. All glassware, syringes, magnetic stirring bars and needles were thoroughly dried. Commercially available chemicals were purchased and used as received. 2,4-di-*tert*-butyl-(2-diphenylphosphanylanylino)phenol (**PNO<sup>H2</sup>**)<sup>1</sup>, Na[B(C<sub>6</sub>F<sub>5</sub>)<sub>4</sub>]<sup>2</sup> and Li[Al(OC(CF<sub>3</sub>)<sub>3</sub>)<sub>4</sub>]<sup>3</sup> were prepared according to reported literature procedures. Air or moisture-sensitive compounds were stored in a glove box and handled under N<sub>2</sub> atmosphere. Purity and identity of the compounds were confirmed by high-resolution multinuclear NMR spectroscopy, mass spectrometry, elemental analysis, and, where possible, X-ray diffraction analysis. <sup>1</sup>H, <sup>11</sup>B, <sup>13</sup>C, <sup>19</sup>F and <sup>31</sup>P NMR spectra were recorded at 298 K with a Bruker Avance II 400 or Bruker 2 Avance III 600 NMR spectrometer and referenced to the solvent in use. Chemical shifts are reported as dimensionless δ values in ppm, coupling constants *J* are given in Hertz (Hz). NMR standards were used as follows: (<sup>1</sup>H NMR) CD<sub>2</sub>Cl<sub>2</sub> = 5.32 ppm; (<sup>13</sup>C{<sup>1</sup>H} NMR) CD<sub>2</sub>Cl<sub>2</sub> = 53.84 ppm. Observed signal patterns are noted according to their multiplicities in the standard fashion (e.g. s = singlet, d = doublet, dd = doublets of doublets, etc.). Overlapping signals with indistinct shapes are described as m = multiplet. Electrospray ionization mass spectra were obtained with a Bruker ApexQe FT-ICR instrument. Absorption spectra were measured on a JASCO V-570 UV/Vis/NIR spectrophotometer.

---

## 2. Syntheses of Phosphenium Salts

### 2.1 Preparation of 1 (PNO<sub>2</sub>PCl)

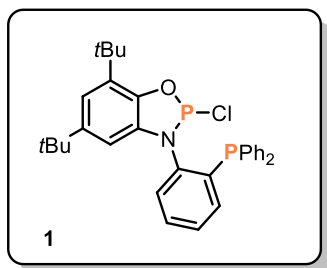

**PNO<sup>H2</sup>** (2.41 g, 5.0 mmol, 1.0 equiv) was dissolved in toluene (20 mL), followed by the addition of PCl<sub>3</sub> (0.72 g, 5.25 mmol, 1.05 equiv). The solution was stirred at room temperature for 12 h, after which the solvent was removed under reduced pressure. The crude product was washed with pentane and dried under reduced pressure to give the product **1** as a white solid (2.41 g, 4.41 mmol, 88 %). Single crystals suitable for X-ray diffraction were grown by cooling a concentrated solution in CH<sub>2</sub>Cl<sub>2</sub> to -40 °C.

**<sup>1</sup>H NMR** (600 MHz, CD<sub>2</sub>Cl<sub>2</sub>): δ 7.54 – 7.46 (m, 2H), 7.44 – 7.35 (m, 4H), 7.30 (ddt, *J* = 7.9, 6.5, 1.8 Hz, 2H), 7.24 – 7.14 (m, 5H), 7.13 – 7.10 (m, 1H), 6.96 (d, *J* = 2.0 Hz, 1H), 6.34 (d, *J* = 1.8 Hz, 1H), 1.44 (s, 9H), 1.21 (s, 9H).

**<sup>13</sup>C{<sup>1</sup>H} NMR** (151 MHz, CD<sub>2</sub>Cl<sub>2</sub>): δ 146.9 (s, 1C), 144.5 (dd, *J* = 11.1, 0.8 Hz, 1C), 136.3 (d, *J* = 0.7 Hz, 1C), 136.2 (dd, *J* = 11.5, 2.4 Hz, 1C), 135.7 (dd, *J* = 10.7, 2.6 Hz, 1C), 134.6 (s, 1C), 134.5 (d, *J* = 1.0 Hz, 2C), 134.4 (d, *J* = 21.3 Hz, 2C), 134.4 (d, *J* = 0.9 Hz, 2C), 134.1 (d, *J* = 2.7 Hz, 2C), 130.7 (s, 2C), 130.2 (d, *J* = 0.7 Hz, 1C), 129.5 (d, *J* = 33.8 Hz, 2C), 129.3 (d, *J* = 0.9 Hz, 1C), 129.2 (d, *J* = 7.0 Hz, 1C), 128.9 (d, *J* = 7.6 Hz, 1C), 116.8 (s, 1C), 107.2 (s, 1C), 35.1 (s, 1C), 34.7 (s, 1C), 31.8 (s, 3C), 29.8 (s, 3C).

**<sup>31</sup>P{<sup>1</sup>H} NMR** (243 MHz, CD<sub>2</sub>Cl<sub>2</sub>): δ 156.4 (d, *J* = 61.2 Hz, **PCl**), -15.8 (d, *J* = 61.5 Hz, **PPh<sub>2</sub>**).

**HRMS** (ESI): [C<sub>32</sub>H<sub>35</sub>ClNOP<sub>2</sub>]<sup>+</sup>, calculated: 546.1877, found: 546.1885.

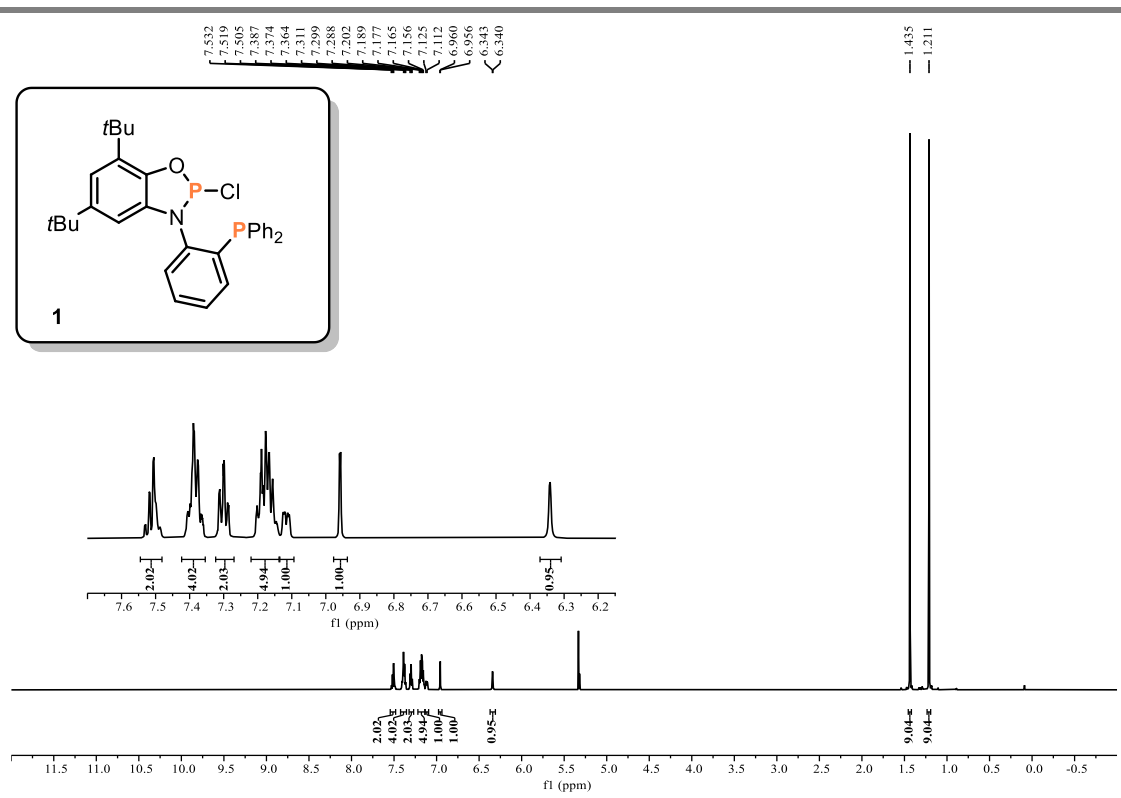

Figure S1: <sup>1</sup>H NMR of **1** (600 MHz, CD<sub>2</sub>Cl<sub>2</sub>).

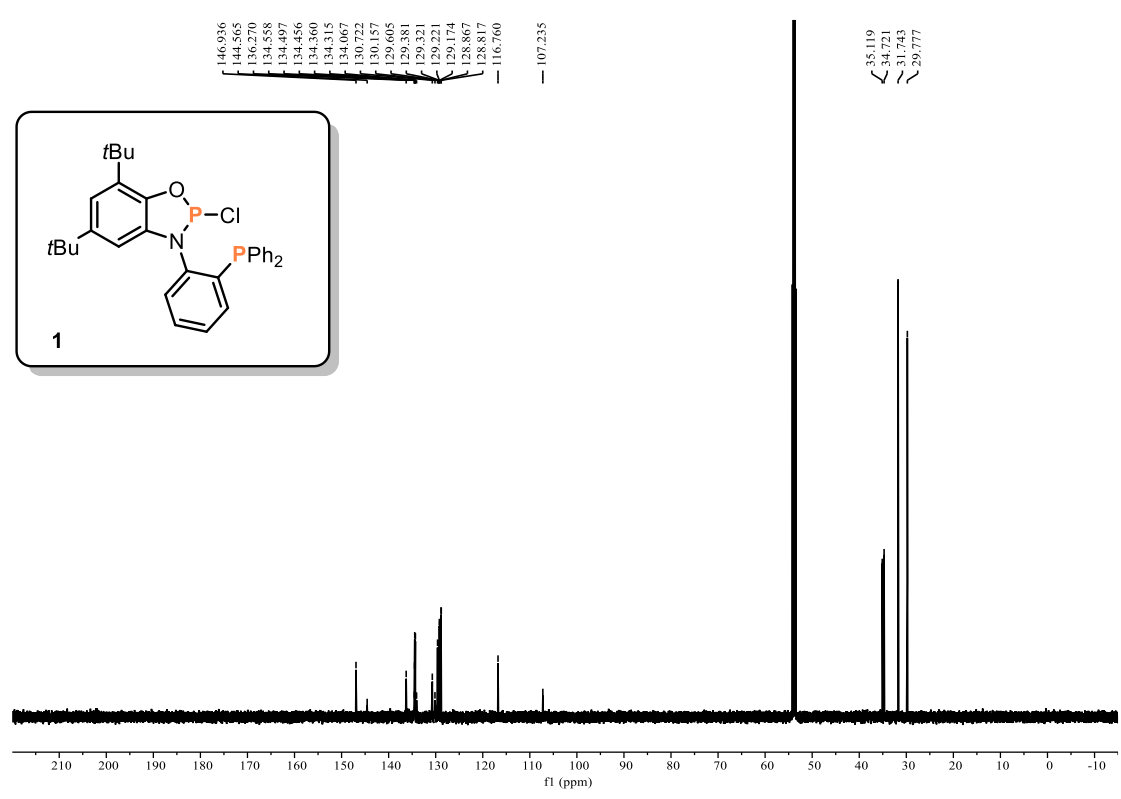

Figure S2: <sup>13</sup>C{<sup>1</sup>H} NMR of **1** (151 MHz, CD<sub>2</sub>Cl<sub>2</sub>).

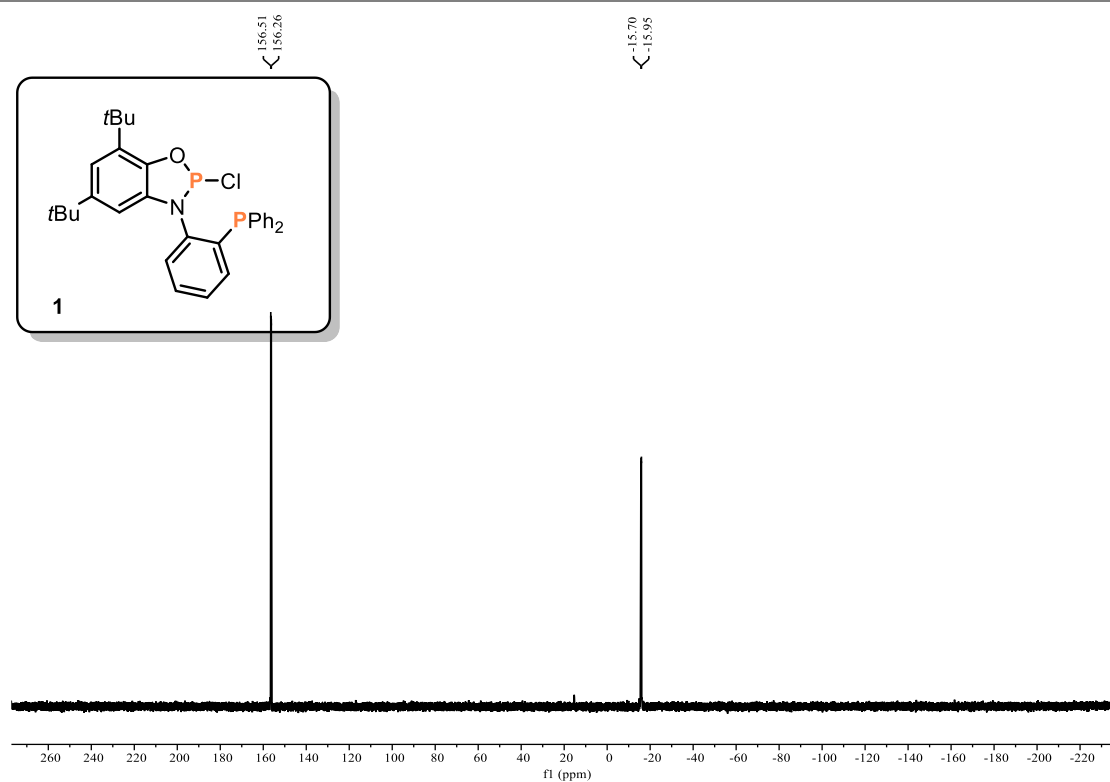

Figure S3:  $^{31}\text{P}\{^1\text{H}\}$  NMR of **1** (243 MHz,  $\text{CD}_2\text{Cl}_2$ ).

## 2.2 Preparation of 2a ([PNOP][B(C<sub>6</sub>F<sub>5</sub>)<sub>4</sub>])

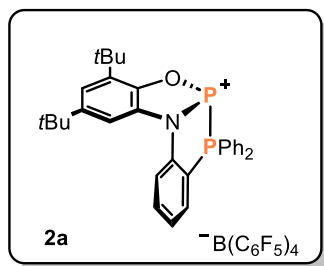

**PNOPCl** (546 mg, 1.0 mmol, 1.0 equiv) and **NaB(C<sub>6</sub>F<sub>5</sub>)<sub>4</sub>** (702 mg, 1.0 mmol, 1.0 equiv) were dissolved in **CH<sub>2</sub>Cl<sub>2</sub>** (10 mL). The yellow solution was stirred at room temperature for 3 h, after which the solid was removed by filtration. Removal of all volatiles *in vacuo* furnished the product **2a** as a yellow

solid (1.15 g, 0.97 mmol, 97 %).

**<sup>1</sup>H NMR** (400 MHz, **CD<sub>2</sub>Cl<sub>2</sub>**): δ 8.13 – 7.98 (m, 2H), 7.86 – 7.66 (m, 6H), 7.60 (td, *J* = 7.5, 1.5 Hz, 1H), 7.51 – 7.42 (m, 1H), 7.32 – 7.21 (m, 2H), 6.97 – 6.88 (m, 3H), 6.85 (d, *J* = 2.0 Hz, 1H), 1.22 (s, 9H), 1.18 (s, 9H).

**<sup>11</sup>B NMR** (128 MHz, **CD<sub>2</sub>Cl<sub>2</sub>**): δ -16.7.

**<sup>13</sup>C{<sup>1</sup>H} NMR** (101 MHz, **CD<sub>2</sub>Cl<sub>2</sub>**): δ 150.0 (s, 1C), 149.9 – 149.6 (m, BArF<sub>20</sub>), 147.5 – 147.2 (m, BArF<sub>20</sub>), 140.0 – 139.6 (m, BArF<sub>20</sub>), 138.5 – 138.3 (m, BArF<sub>20</sub>), 138.1 – 137.7 (m, BArF<sub>20</sub>), 137.1 (s, 2C), 135.9 (d, *J* = 3.0 Hz, 1C), 135.6 – 135.4 (m, BArF<sub>20</sub>), 134.9 (d, *J* = 3.3 Hz, 2C), 134.4 (d, *J* = 4.0 Hz, 2C), 133.8 (dd, *J* = 9.5, 2.1 Hz, 1C), 132.9 (d, *J* = 12.0 Hz, 2C), 131.9 (d, *J* = 7.5 Hz, 2C), 131.3 (d, *J* = 12.1 Hz, 1C), 130.6 (d, *J* = 12.9 Hz, 1C), 128.5 (dd, *J* = 6.0, 4.3 Hz, 1C), 119.9 (s, 1C), 108.5 (d, *J* = 3.1 Hz, 1C), 35.4 (s, 1C), 34.9 (s, 1C), 31.5 (s, 3C), 29.6 (s, 3C). 6 carbons could not be reliably assigned due to low intensity.

**<sup>19</sup>F NMR** (376 MHz, **CD<sub>2</sub>Cl<sub>2</sub>**): δ -130.4 – -139.6 (m), -163.6 (t, *J* = 20.4 Hz), -167.5 (t, *J* = 17.9 Hz).

**<sup>31</sup>P{<sup>1</sup>H} NMR** (162 MHz, **CD<sub>2</sub>Cl<sub>2</sub>**): δ 157.6 (d, *J* = 404.9 Hz, *OPN*), 9.6 (d, *J* = 404.9 Hz, *PPh<sub>2</sub>*).

**HRMS** (ESI): [**C<sub>32</sub>H<sub>34</sub>NOP<sub>2</sub>**]<sup>+</sup>, calculated: 510.2110, found: 510.2116.

**Elem. Anal.** for **C<sub>56</sub>H<sub>34</sub>BF<sub>20</sub>NOP<sub>2</sub>** x 0.5 **CH<sub>2</sub>Cl<sub>2</sub>** calculated: C, 55.08; H, 2.86; N, 1.14; found C, 55.20; H, 3.13; N, 1.29 (**CH<sub>2</sub>Cl<sub>2</sub>** content estimated from **<sup>1</sup>H NMR** measurements).

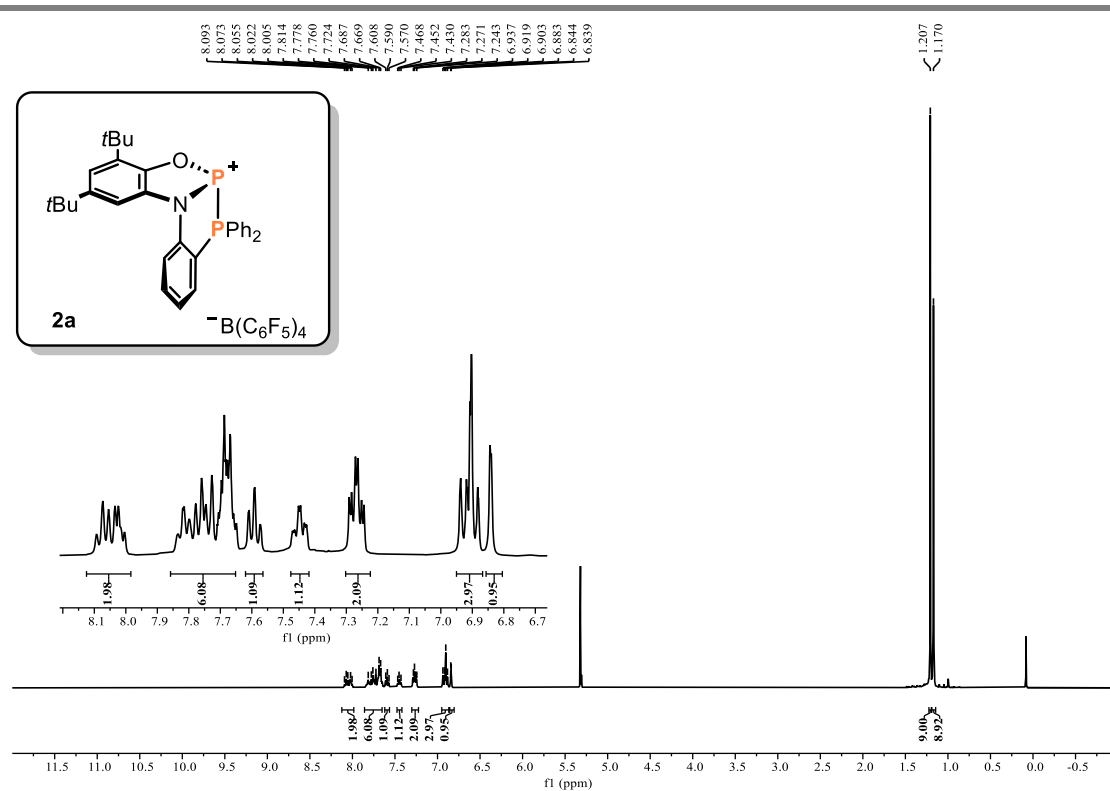

Figure S4:  $^1H$  NMR of **2a** (400 MHz,  $CD_2Cl_2$ ).

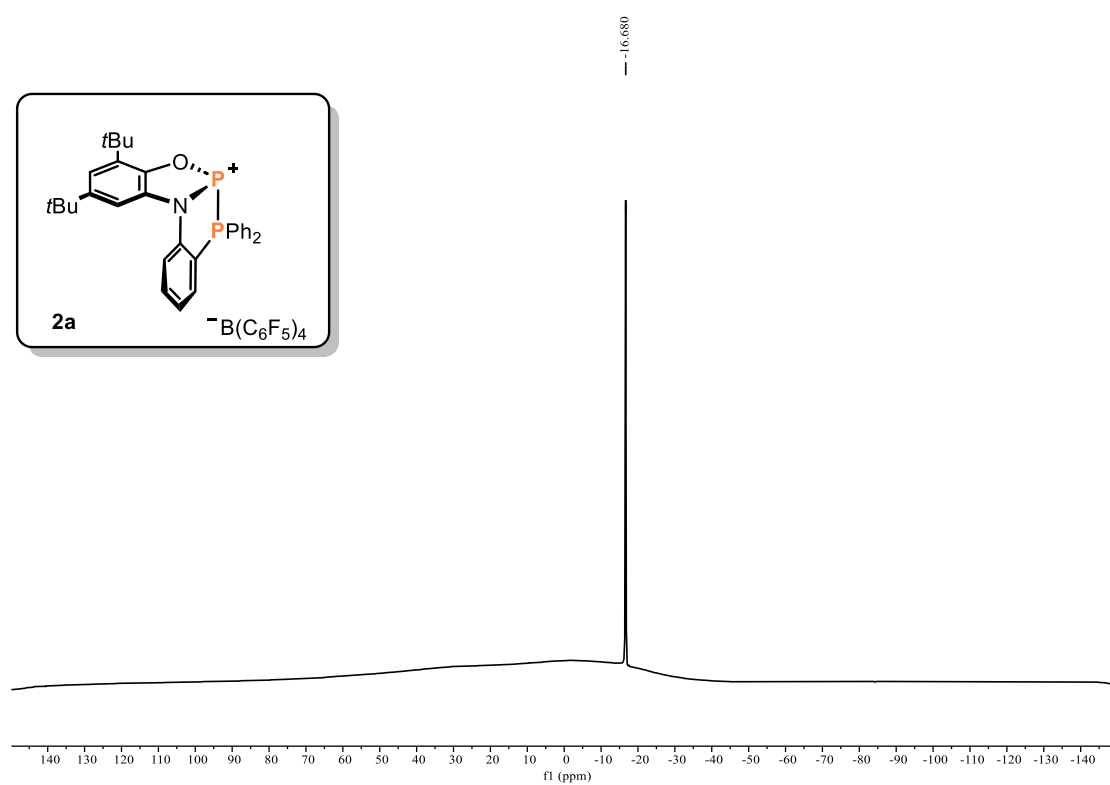

Figure S5:  $^{11}B$  NMR of **2a** (128 MHz,  $CD_2Cl_2$ ).



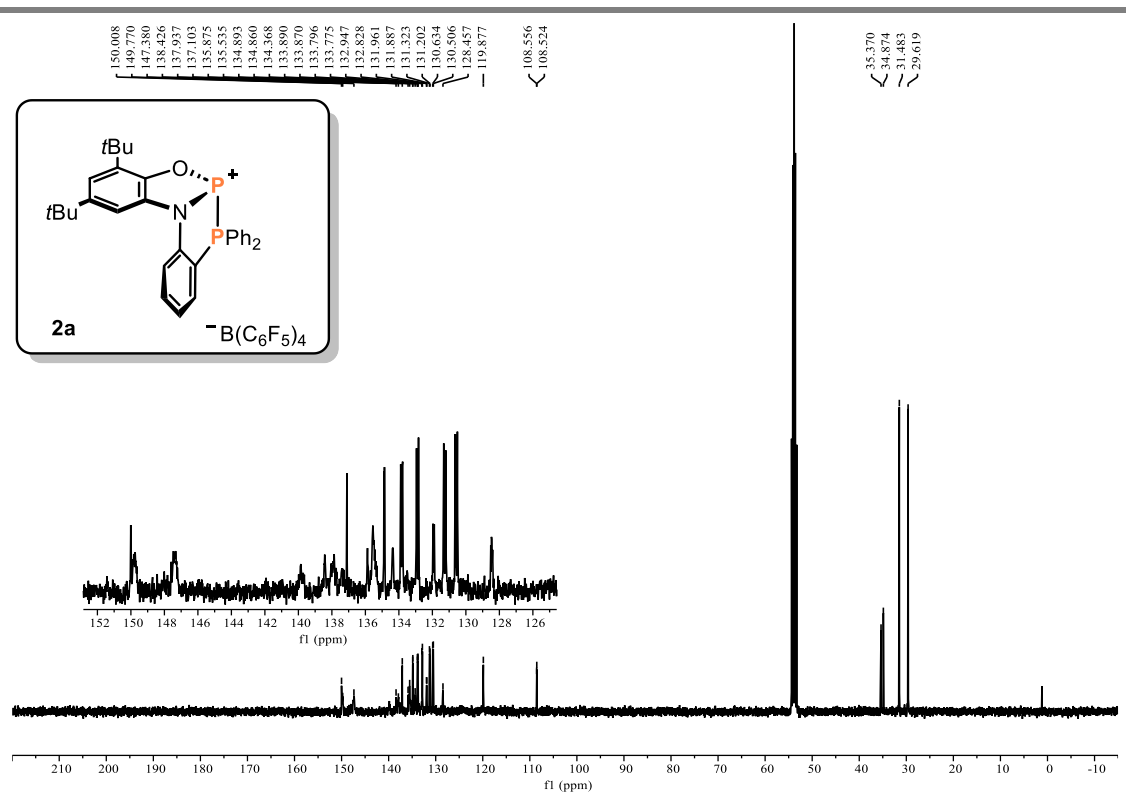

Figure S6:  $^{13}\text{C}\{^1\text{H}\}$  NMR of **2a** (101 MHz,  $\text{CD}_2\text{Cl}_2$ ).

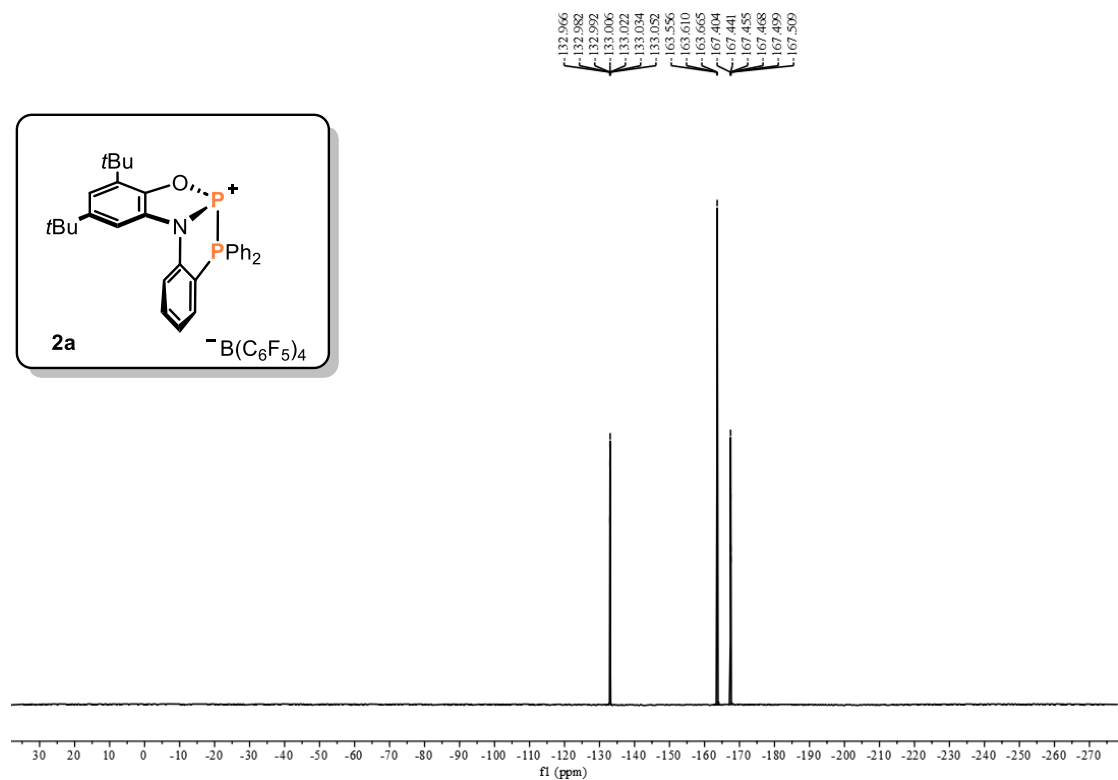

Figure S7:  $^{19}\text{F}$  NMR of **2a** (376 MHz,  $\text{CD}_2\text{Cl}_2$ ).

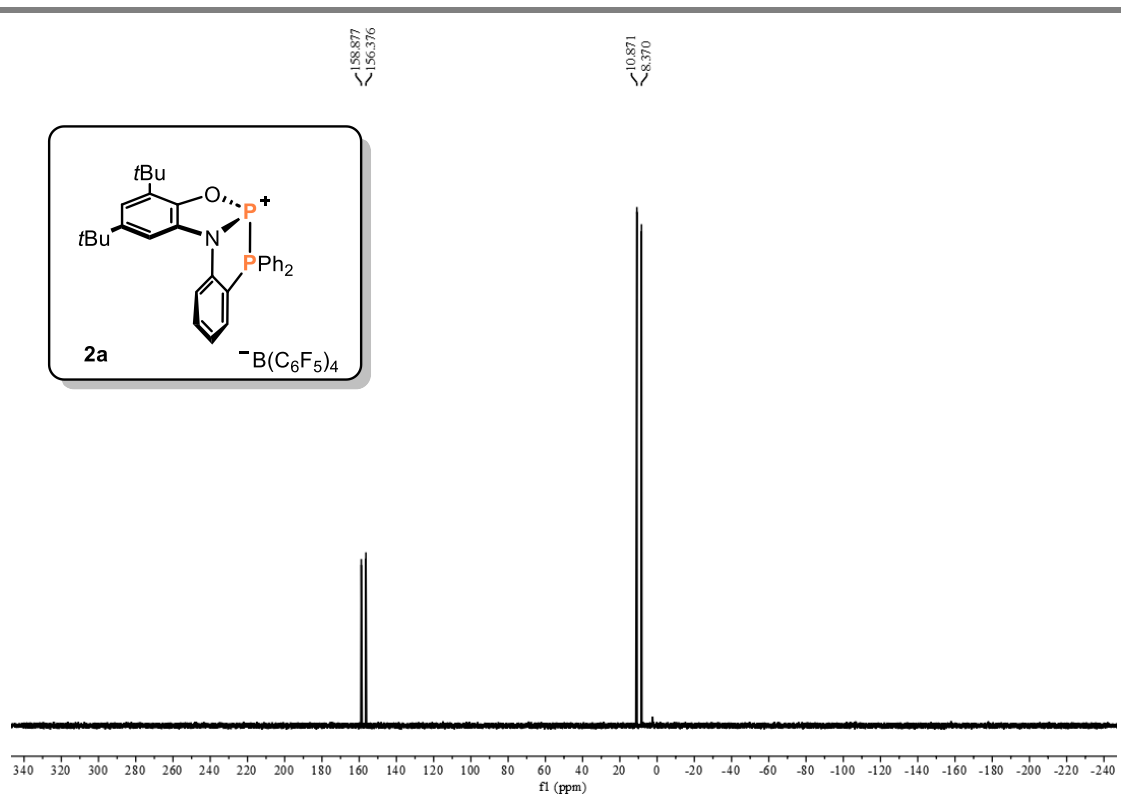

Figure S8:  $^{31}\text{P}\{^1\text{H}\}$  NMR of **2a** (162 MHz,  $\text{CD}_2\text{Cl}_2$ ).

## 2.3 Preparation of **2b** ([PNOP][Al(OC(CF<sub>3</sub>)<sub>3</sub>)<sub>4</sub>])

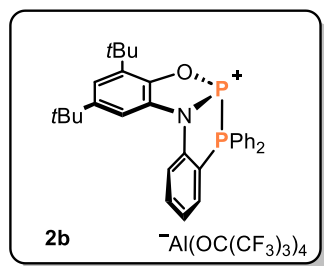

**PNOPCl** (273 mg, 0.5 mmol, 1.0 equiv) and  $LiAl(OC(CF_3)_3)_4$  (487 mg, 0.5 mmol, 1.0 equiv) were dissolved in  $CH_2Cl_2$  (5 mL).

The yellow solution was stirred at room temperature for 3 h, after which the solid was removed by filtration. Removal of all volatiles *in vacuo* furnished the product **2b** as a yellow solid

(610 mg, 0.41 mmol, 82 %). Single crystals suitable for X-ray diffraction were grown by cooling a concentrated solution in  $CH_2Cl_2$  to  $-40\text{ }^\circ\text{C}$ .

$^1\text{H NMR}$  (400 MHz,  $CD_2Cl_2$ ):  $\delta$  8.12 (tt,  $J = 7.8, 1.3$  Hz, 1H), 8.05 (dddd,  $J = 8.1, 4.5, 1.2, 0.5$  Hz, 1H), 7.89 – 7.82 (m, 1H), 7.80 – 7.68 (m, 5H), 7.61 (tdd,  $J = 7.7, 1.5, 0.5$  Hz, 1H), 7.52 – 7.44 (m, 1H), 7.34 – 7.27 (m, 2H), 6.94 – 6.92 (m, 2H), 6.92 – 6.89 (m, 1H), 6.86 (dt,  $J = 2.0, 0.5$  Hz, 1H), 1.23 (s, 9H), 1.19 (s, 9H).

$^{13}\text{C}\{^1\text{H}\}$  NMR (151 MHz,  $CD_2Cl_2$ ):  $\delta$  150.1 (s, 1C), 148.1 (dd,  $J = 22.8, 4.1$  Hz, 1C), 147.6 (d,  $J = 11.3$  Hz, 1C), 138.5 (dd,  $J = 2.1, 1.0$  Hz, 1C), 137.2 (s, 2C), 135.9 (dd,  $J = 3.1, 0.9$  Hz, 1C), 135.7 (d,  $J = 3.5$  Hz, 1C), 134.9 (d,  $J = 3.3$  Hz, 2C), 134.5 (d,  $J = 4.2$  Hz, 2C), 133.8 (dd,  $J = 9.3, 2.1$  Hz, 1C), 132.9 (d,  $J = 11.9$  Hz, 2C), 132.0 (d,  $J = 7.5$  Hz, 2C), 131.4 (d,  $J = 12.3$  Hz, 1C), 130.6 (d,  $J = 13.0$  Hz, 1C), 128.5 (dd,  $J = 6.1, 4.2$  Hz, 1C), 121.7 (q,  $J = 295$  Hz,  $OC(CF_3)_4$ ), 120.0 (s, 1C), 118.3 (d,  $J = 0.8$  Hz, 1C), 117.9 (d,  $J = 1.0$  Hz, 1C), 108.6 (d,  $J = 3.2$  Hz, 1C), 35.4 (s, 1C), 34.9 (s, 1C), 31.5 (s, 3C), 29.6 (s, 3C).

$^{19}\text{F NMR}$  (565 MHz,  $CD_2Cl_2$ ):  $\delta$  -75.7.

$^{31}\text{P}\{^1\text{H}\}$  NMR (243 MHz,  $CD_2Cl_2$ ):  $\delta$  157.6 (d,  $J = 405.2$  Hz, *OPN*), 9.6 (d,  $J = 405.2$  Hz, *PPh<sub>2</sub>*).

**HRMS** (ESI):  $[C_{32}H_{34}NOP_2]^+$ , calculated: 510.2110, found: 510.2117.

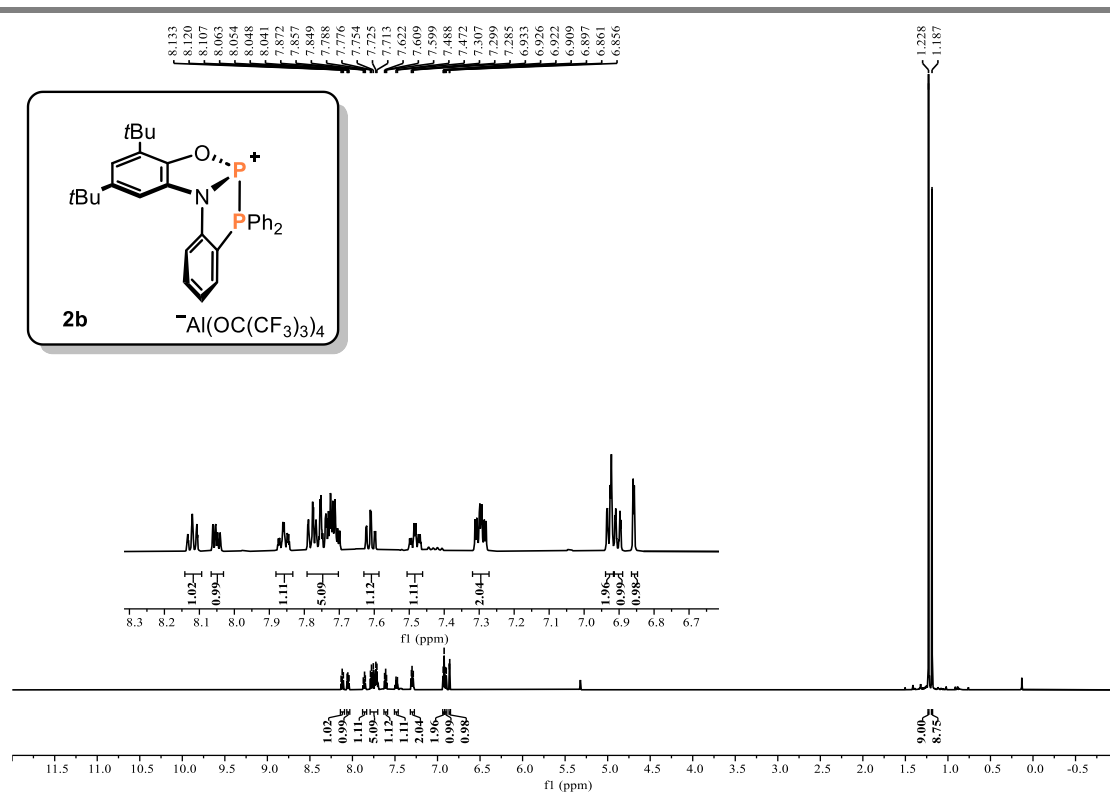

Figure S9:  $^1H$  NMR of **2b** (600 MHz,  $CD_2Cl_2$ ).

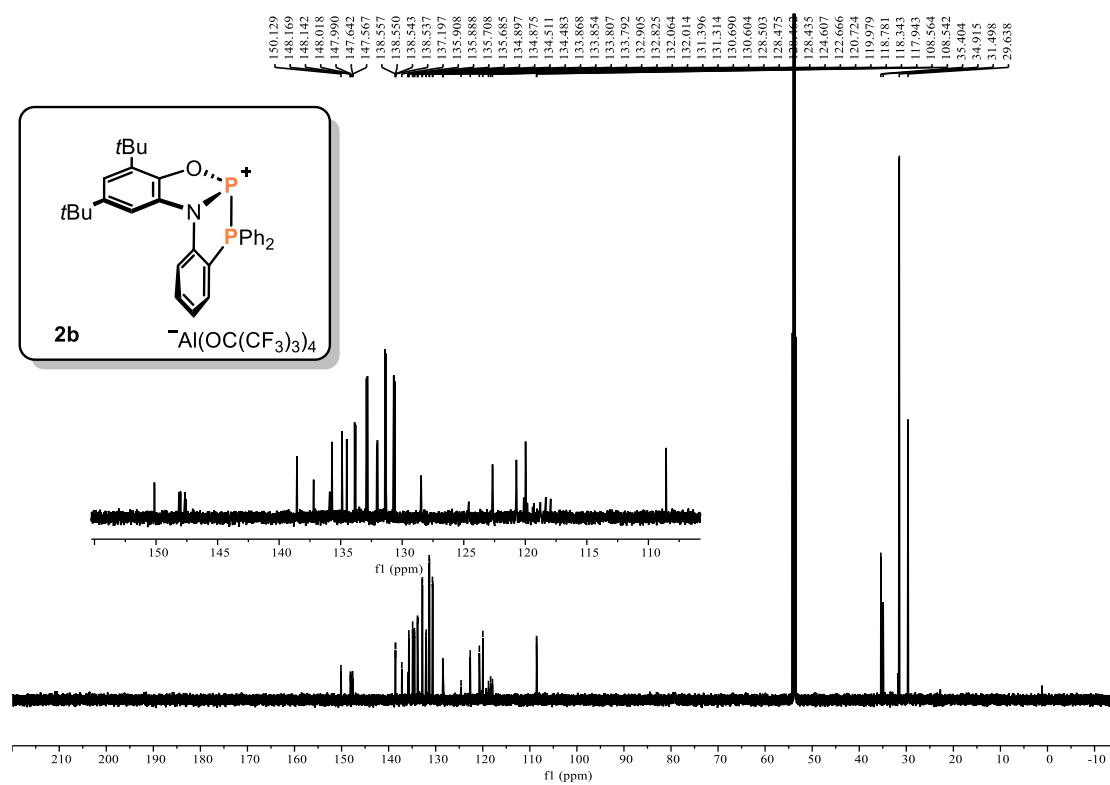

Figure S10:  $^{13}C\{^1H\}$  NMR of **2b** (151 MHz,  $CD_2Cl_2$ ).

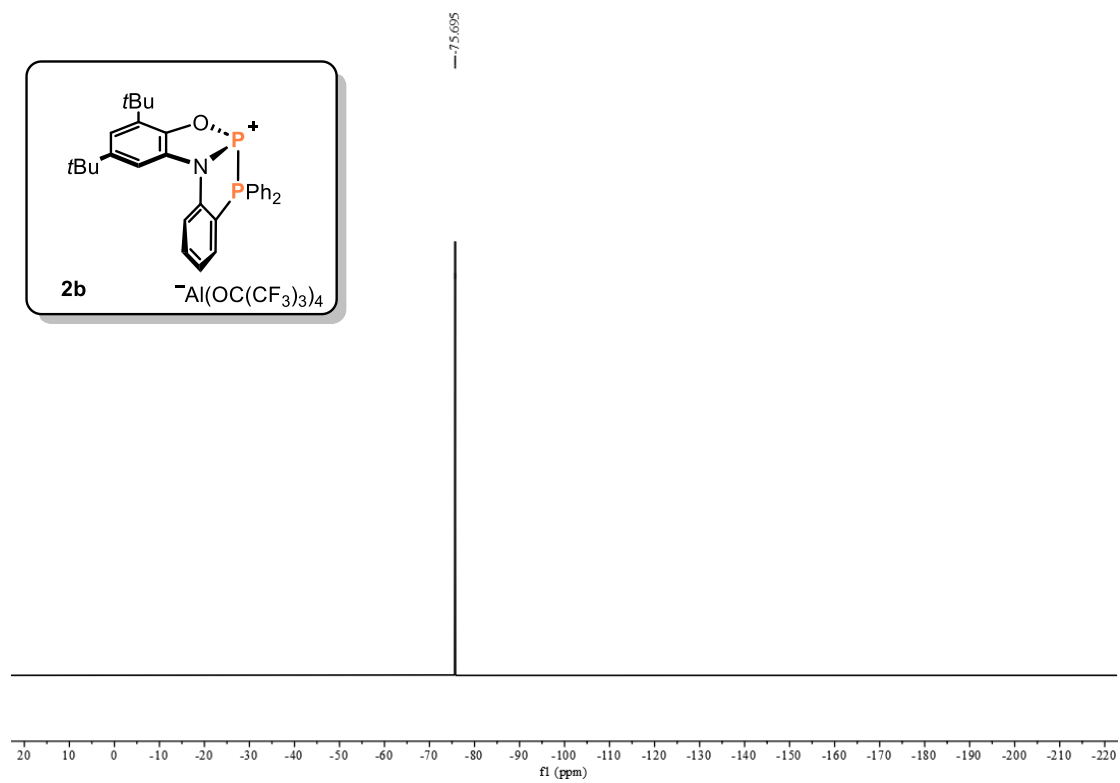

Figure S11:  $^{19}\text{F}$  NMR of **2b** (565 MHz,  $\text{CD}_2\text{Cl}_2$ ).

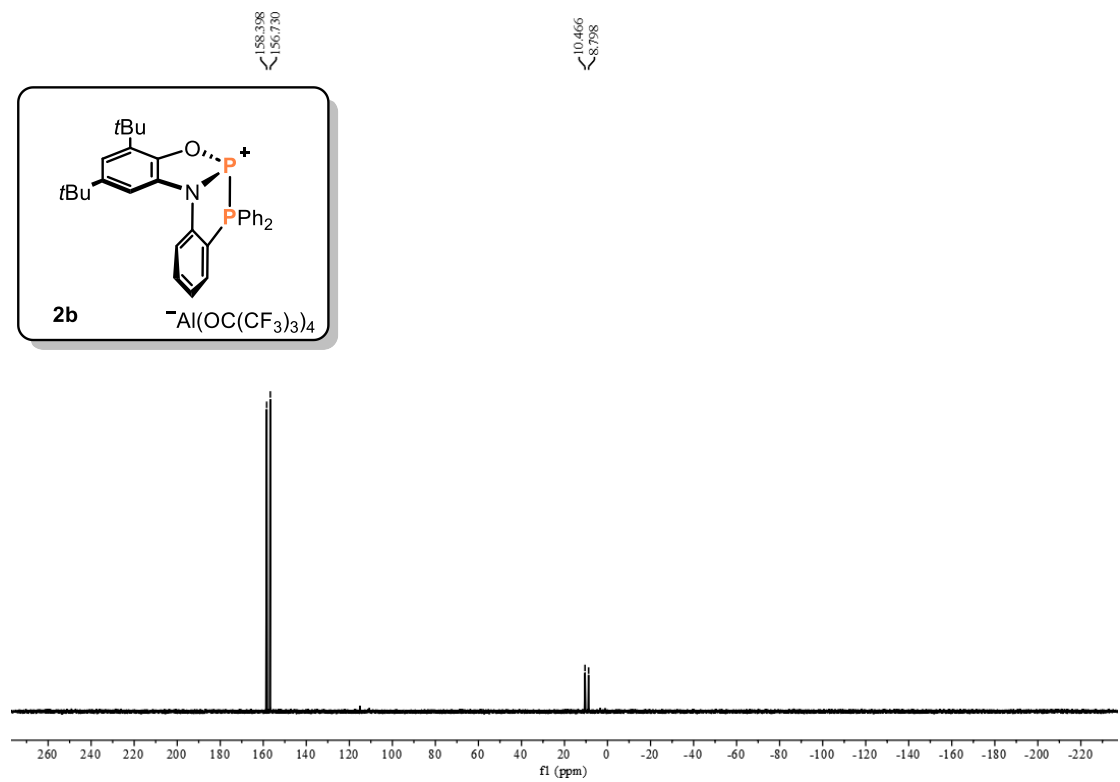

Figure S12:  $^{31}\text{P}\{^1\text{H}\}$  NMR of **2b** (243 MHz,  $\text{CD}_2\text{Cl}_2$ ).

---

### 3. Phosphinophosphination of Alkynes

#### 3.1 Possible diastereomers for the reaction product

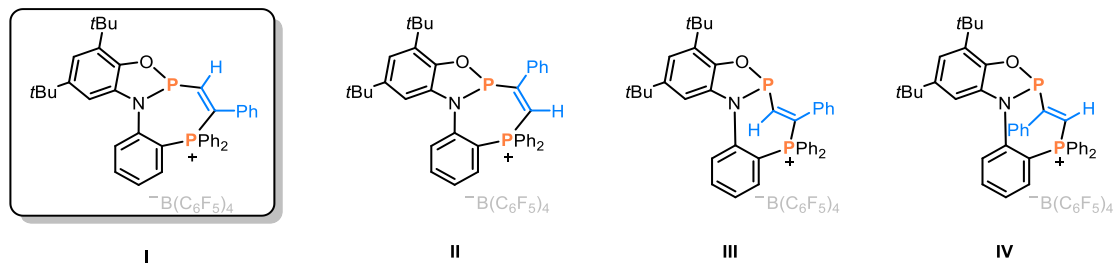

Four possible diastereomers can form for the reaction product of  $[\text{PNOP}][\text{B}(\text{C}_6\text{F}_5)_4]$  **2a** with phenylacetylene. Only the *cis*-addition isomer (**I**) with phenyl group and cationic P on the same side formed, which was confirmed by single crystals XRD.

## 3.2 Preparation of 3

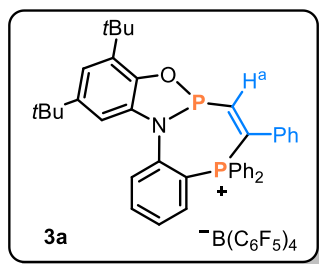

**2a** (300 mg, 252  $\mu\text{mol}$ , 1.0 equiv) was dissolved in 5 mL  $\text{CH}_2\text{Cl}_2$ , followed by the addition of phenylacetylene (25.7 mg, 252  $\mu\text{mol}$ , 1.0 equiv). The mixture was stirred at room temperature for 2 h. Removal of all volatiles *in vacuo* furnished the product **3a** as an orange solid (294 mg, 227  $\mu\text{mol}$ , 90 %).

Single crystals suitable for X-ray diffraction were grown by gas phase diffusion of pentane into the  $\text{CH}_2\text{Cl}_2$  solution.

**$^1\text{H}$  NMR** (600 MHz,  $\text{CD}_2\text{Cl}_2$ ):  $\delta$  8.03 (dd,  $J = 47.4, 25.2$  Hz,  $\text{C}=\text{CPH}^a$ ), 7.94 – 7.88 (m, 1H), 7.73 (dd,  $J = 8.1, 4.9$  Hz, 1H), 7.68 (tdd,  $J = 7.5, 2.2, 1.1$  Hz, 1H), 7.62 (td,  $J = 7.4, 1.7$  Hz, 1H), 7.52 (td,  $J = 7.8, 3.9$  Hz, 1H), 7.49 – 7.37 (m, 8H), 7.35 (ddd,  $J = 13.4, 8.0, 1.4$  Hz, 1H), 7.16 (td,  $J = 7.5, 1.3$  Hz, 1H), 7.07 (t,  $J = 7.7$  Hz, 2H), 6.93 (dt,  $J = 8.5, 1.4$  Hz, 1H), 6.87 (d,  $J = 2.0$  Hz, 1H), 5.58 (d,  $J = 2.0$  Hz, 1H), 1.42 (s, 9H), 1.06 (s, 9H).

**$^{11}\text{B}$  NMR** (193 MHz,  $\text{CD}_2\text{Cl}_2$ ):  $\delta$  -16.7.

**$^{13}\text{C}\{^1\text{H}\}$  NMR** (151 MHz,  $\text{CD}_2\text{Cl}_2$ ):  $\delta$  165.4 (dd,  $J = 66.9, 14.1$  Hz, 1C), 149.5 – 149.2 (m,  $\text{BArF}_{20}$ ), 147.9 – 147.6 (m,  $\text{BArF}_{20}$ ), 146.4 (s, 1C), 146.3 (d,  $J = 13.1$  Hz, 1C), 143.5 (dd,  $J = 19.0, 4.4$  Hz), 139.7 – 139.2 (m,  $\text{BArF}_{20}$ ), 138.7 (d,  $J = 2.8$  Hz, 1C), 138.0 – 137.7 (m,  $\text{BArF}_{20}$ ), 137.6 – 137.4 (m,  $\text{BArF}_{20}$ ), 137.2 (d,  $J = 13.4$  Hz, 1C), 136.7 (d,  $J = 1.8$  Hz, 1C), 136.3 (d,  $J = 9.5$  Hz, 1C), 136.0 – 135.8 (m,  $\text{BArF}_{20}$ ), 135.7 (d,  $J = 3.1$  Hz, 2C), 135.2 (d,  $J = 2.9$  Hz, 2C), 134.2 (d,  $J = 9.3$  Hz, 2C), 134.0 (d,  $J = 2.9$  Hz, 1C), 133.9 (d,  $J = 11.2$  Hz, 2C), 130.6 (dd,  $J = 20.4, 13.1$  Hz, 1C), 130.1 (d,  $J = 1.8$  Hz, 1C), 129.3 (s, 1C), 129.2 (s, 2C), 129.1 (dd,  $J = 4.5, 2.3$  Hz, 1C), 127.7 (d,  $J = 3.0$  Hz, 2C), 127.2 (d,  $J = 2.8$  Hz, 2C), 120.0 (dd,  $J = 88.6, 4.3$  Hz, 1C), 118.0 (s, 1C), 117.9 (d,  $J = 1.8$  Hz, 1C), 117.3 (d,  $J = 1.4$  Hz, 1C), 105.2 (s, 1C), 35.0 (s, 1C), 34.9 (s, 1C), 31.6 (s, 3C), 29.6 (s, 3C).

**$^{19}\text{F}$  NMR** (565 MHz,  $\text{CD}_2\text{Cl}_2$ ):  $\delta$  -133.0 – -133.1 (m), -163.6 (t,  $J = 20.3$  Hz), -167.5 (t,  $J = 19.4$  Hz).

**$^{31}\text{P}\{^1\text{H}\}$  NMR** (243 MHz,  $\text{CD}_2\text{Cl}_2$ ):  $\delta$  145.5 (d,  $J = 4.7$  Hz,  $\text{OPN}$ ), 24.5 (d,  $J = 4.7$  Hz,  $\text{PPh}_2$ ).

HRMS (ESI):  $[C_{40}H_{40}NOP_2]^+$ , calculated: 612.2580, found: 612.2585.

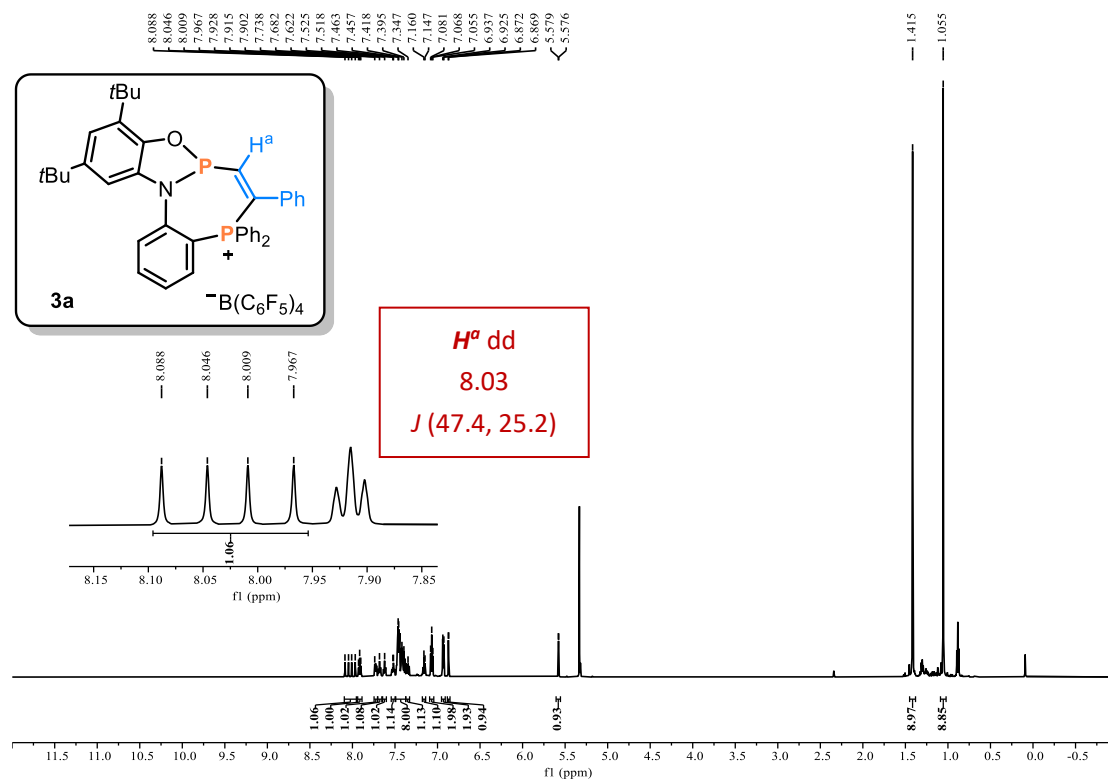

Figure S13:  $^1H$  NMR of **3a** (600 MHz,  $CD_2Cl_2$ ).

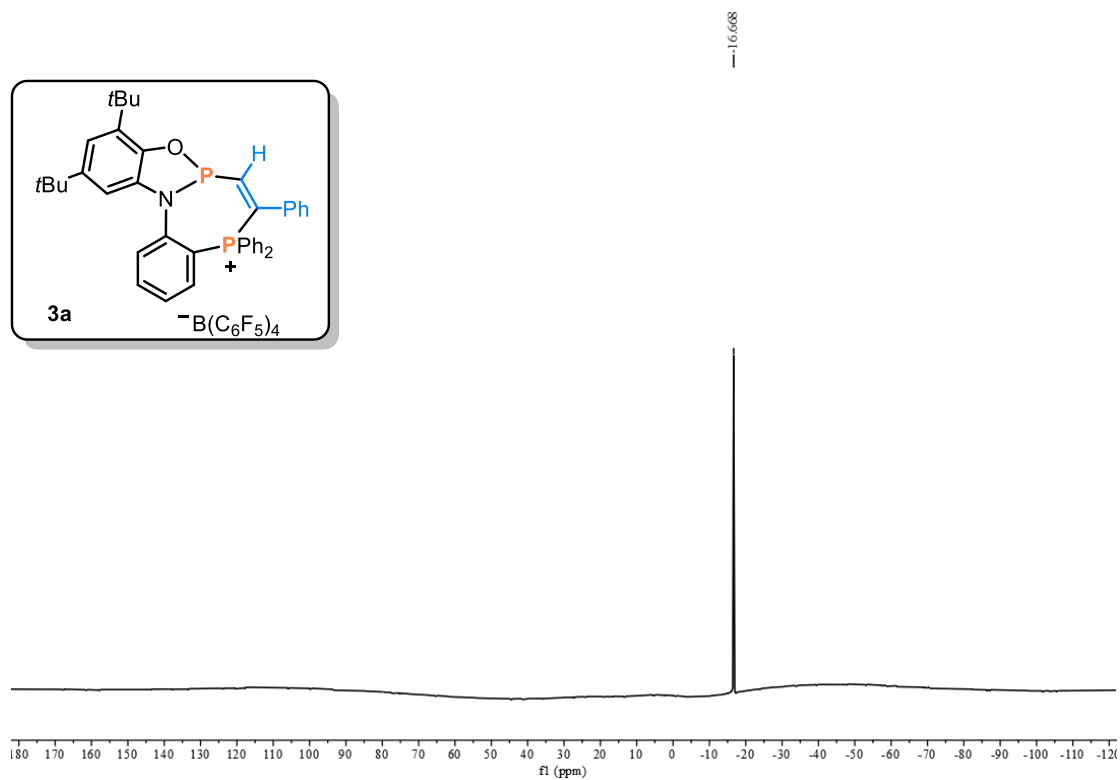

Figure S14:  $^{11}B$  NMR of **3a** (193 MHz,  $CD_2Cl_2$ ).



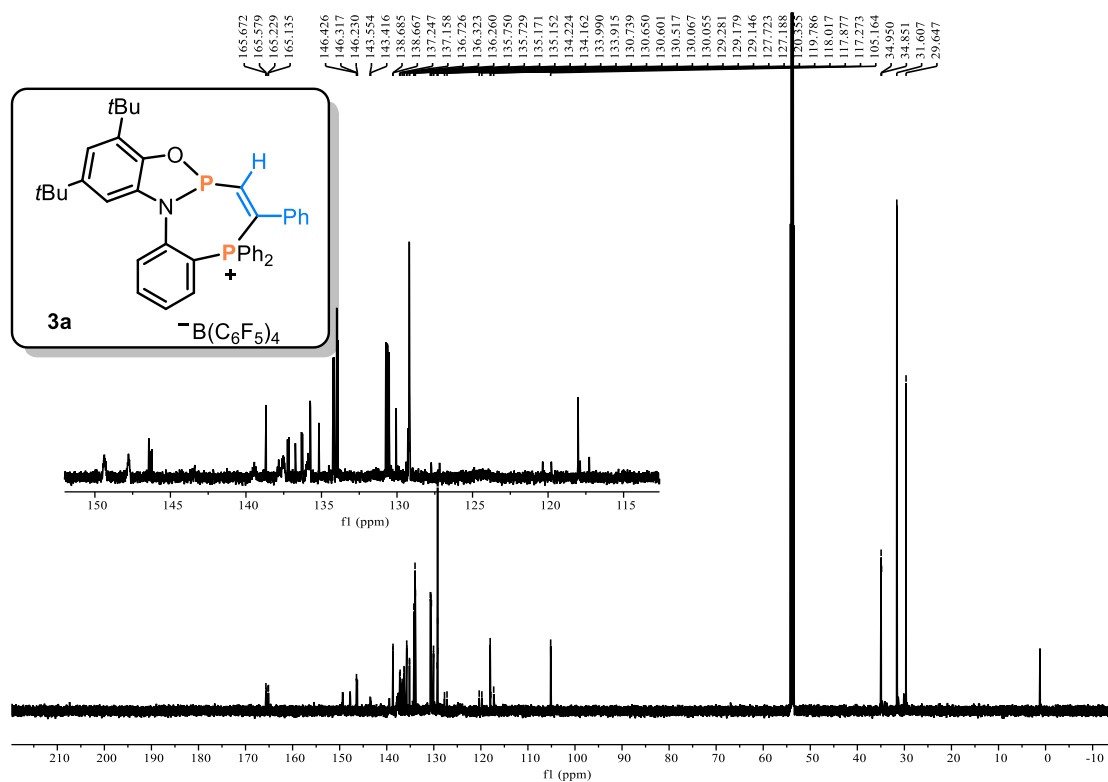

Figure S15:  $^{13}\text{C}$  NMR of **3a** (151 MHz,  $\text{CD}_2\text{Cl}_2$ ).

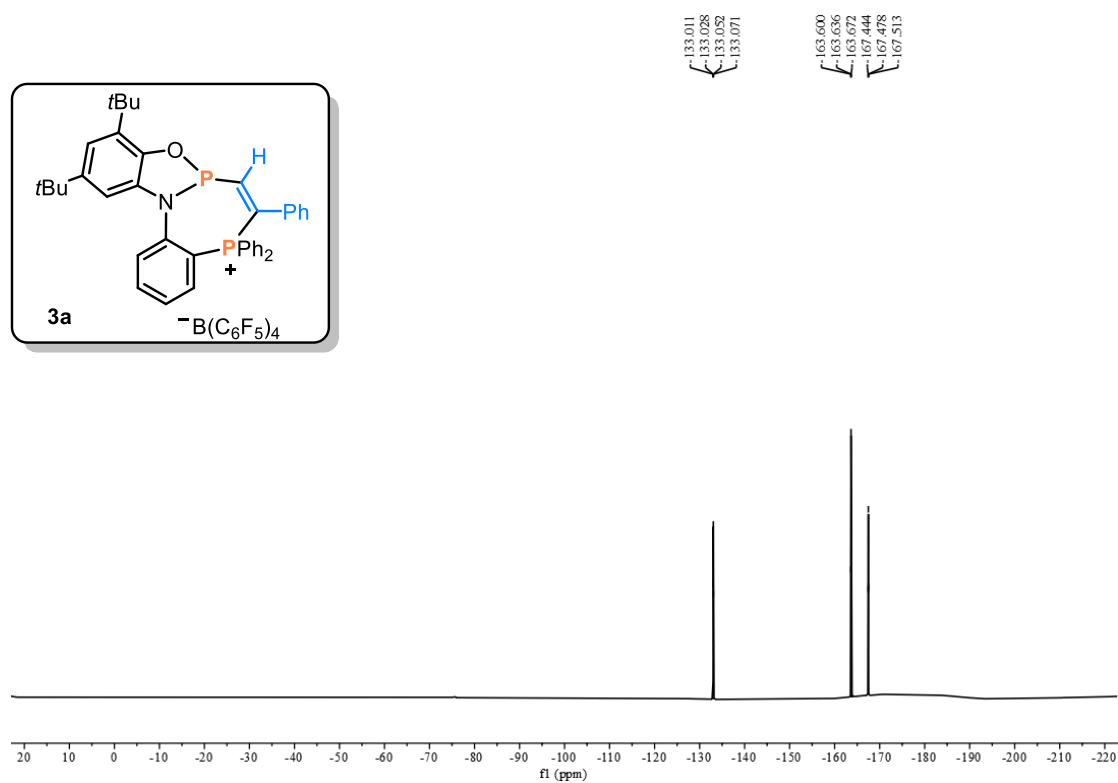

Figure S16:  $^{19}\text{F}$  NMR of **3a** (565 MHz,  $\text{CD}_2\text{Cl}_2$ ).

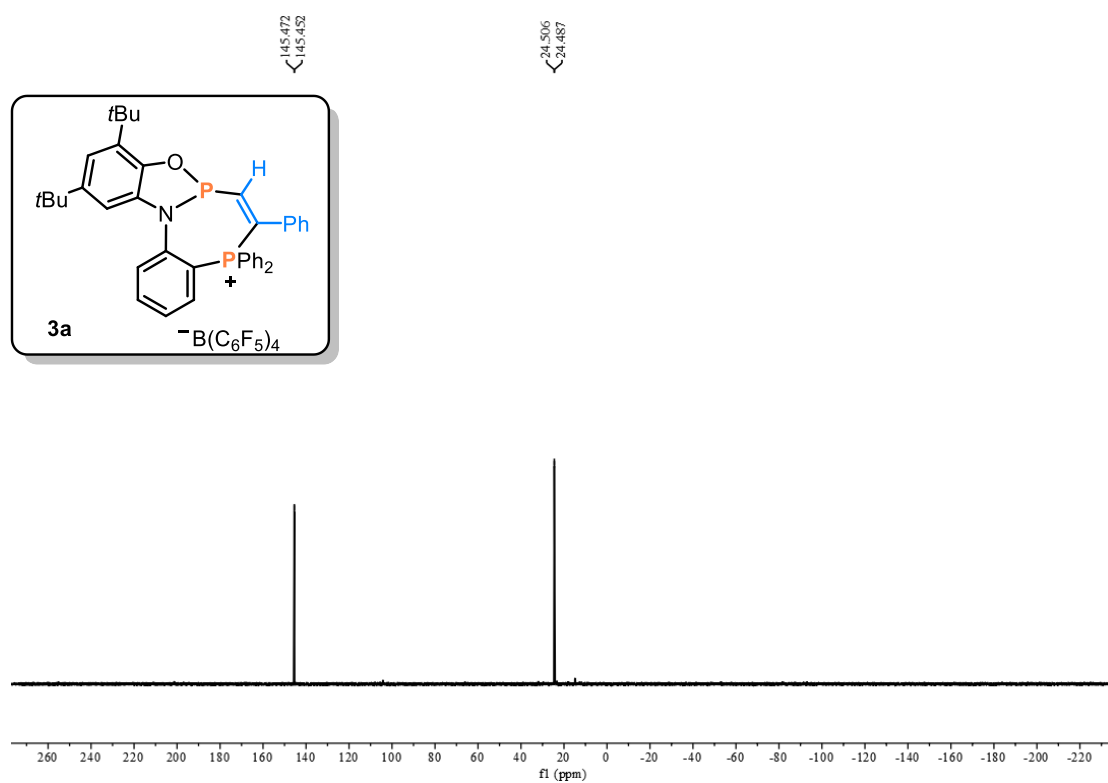

Figure S17:  $^{31}\text{P}\{^1\text{H}\}$  NMR of **3a** (243 MHz,  $\text{CD}_2\text{Cl}_2$ ).

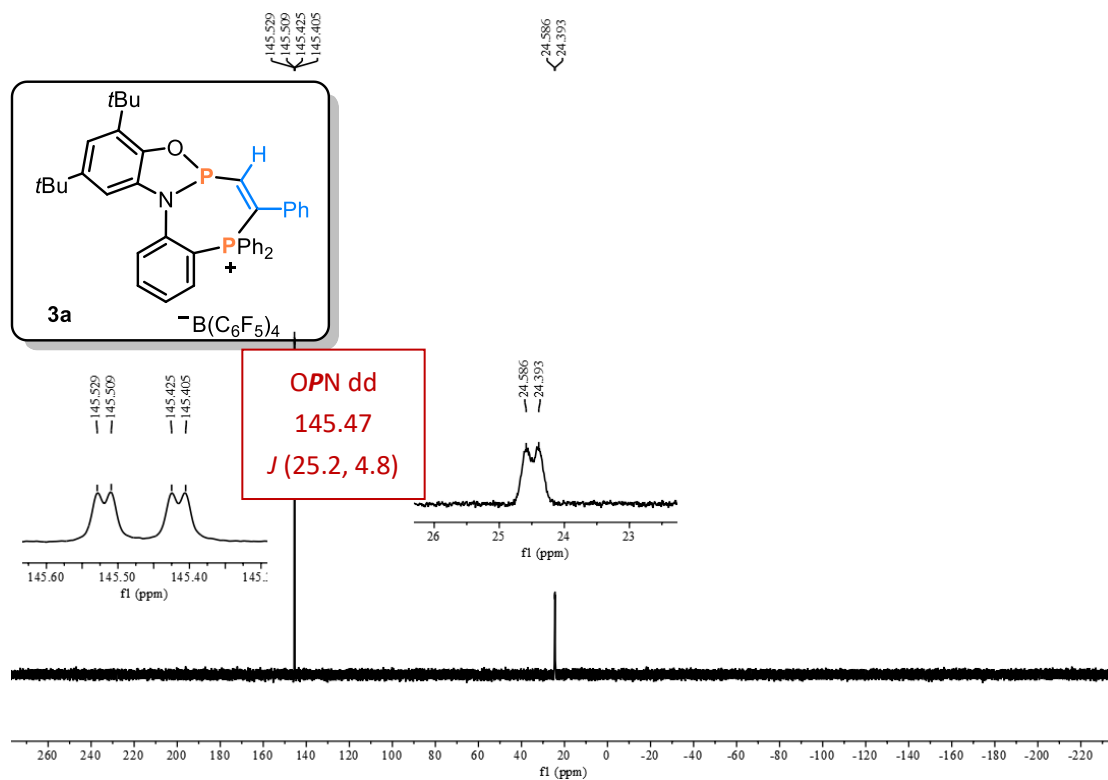

Figure S18:  $^{31}\text{P}$  NMR of **3a** (243 MHz,  $\text{CD}_2\text{Cl}_2$ ).

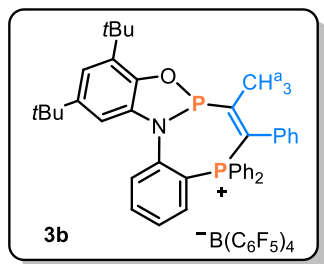

**2a** (100 mg, 84  $\mu\text{mol}$ , 1.0 equiv) was dissolved in 2 mL  $\text{CH}_2\text{Cl}_2$ , followed by the addition of 1-phenyl-1-propyne (9.8 mg, 84  $\mu\text{mol}$ , 1.0 equiv). The mixture was stirred at 60  $^\circ\text{C}$  for 16 h. The solvent was then removed under reduced pressure and the solid was washed with pentane and dried *in vacuo* to give the

product **3b** as an orange solid (91.5 mg, 70  $\mu\text{mol}$ , 83 %). Single crystals suitable for X-ray diffraction were grown by gas phase diffusion of pentane into the  $\text{CH}_2\text{Cl}_2$  solution.

$^1\text{H NMR}$  (400 MHz,  $\text{CD}_2\text{Cl}_2$ ):  $\delta$  7.91 – 7.81 (m, 1H), 7.75 – 7.61 (m, 3H), 7.60 – 7.50 (m, 2H), 7.49 – 7.37 (m, 6H), 7.37 – 7.28 (m, 2H), 7.14 – 7.06 (m, 1H), 7.03 (td,  $J = 7.5, 1.5$  Hz, 2H), 6.97 (d,  $J = 2.0$  Hz, 1H), 6.64 (s, 2H), 5.76 (d,  $J = 2.0$  Hz, 1H), 2.18 (dd,  $J = 6.8, 3.2$  Hz, 3H,  $\text{C}=\text{CPC}H^a_3$ ), 1.46 (s, 9H), 1.10 (s, 9H).

$^{11}\text{B NMR}$  (128 MHz,  $\text{CD}_2\text{Cl}_2$ ):  $\delta$  -16.7.

$^{13}\text{C}\{^1\text{H}\}$  NMR (101 MHz,  $\text{CD}_2\text{Cl}_2$ ):  $\delta$  176.3 (dd,  $J = 61.2, 14.1$  Hz, 1C), 149.9 – 149.4 (m,  $\text{BArF}_{20}$ ), 147.5 – 147.1 (m,  $\text{BArF}_{20}$ ), 146.6 (s, 1C), 146.2 (d,  $J = 13.0$  Hz, 1C), 143.9 (dd,  $J = 19.7, 6.4$  Hz, 1C), 140.0 – 139.6 (m,  $\text{BArF}_{20}$ ), 138.1 (d,  $J = 2.6$  Hz, 1C), 138.1 – 137.7 (m,  $\text{BArF}_{20}$ ), 137.6 – 137.2 (m,  $\text{BArF}_{20}$ ), 136.7 (s, 1C), 135.7 (d,  $J = 8.3$  Hz, 2C), 135.6 – 135.3 (m,  $\text{BArF}_{20}$ ), 135.2 (d,  $J = 3.1$  Hz, 2C), 135.0 (d,  $J = 2.9$  Hz, 2C), 134.4 (d,  $J = 9.1$  Hz, 2C), 134.1 (d,  $J = 13.5$  Hz, 1C), 133.9 (d,  $J = 11.0$  Hz, 2C), 133.8 (d,  $J = 3.0$  Hz, 1C), 130.4 (dd,  $J = 15.2, 13.0$  Hz, 1C), 129.5 (s, 1C), 129.4 (d,  $J = 2.7$  Hz, 1C), 129.2 (d,  $J = 12.1$  Hz, 1C), 127.8 (dd,  $J = 8.3, 2.5$  Hz, 1C), 127.3 (d,  $J = 4.4$  Hz, 1C), 126.5 (d,  $J = 4.4$  Hz, 1C), 123.0 (dd,  $J = 77.3, 16.1$  Hz, 1C), 120.8 (d,  $J = 3.3$  Hz, 1C), 119.9 (d,  $J = 3.0$  Hz, 1C), 118.5 (d,  $J = 2.1$  Hz, 1C), 118.5 (s, 1C), 117.6 (d,  $J = 2.1$  Hz, 1C), 106.3 (s, 1C), 35.0 (s, 1C), 35.0 (s, 1C), 31.6 (s, 3C), 29.8 (s, 3C), 18.7 (dd,  $J = 18.7, 14.5$  Hz, 1C).

$^{19}\text{F NMR}$  (376 MHz,  $\text{CD}_2\text{Cl}_2$ ):  $\delta$  -132.9 – -133.1 (m), -163.6 (t,  $J = 20.4$  Hz), -167.5 (t,  $J = 19.6$  Hz).

$^{31}\text{P}\{^1\text{H}\}$  NMR (162 MHz,  $\text{CD}_2\text{Cl}_2$ ):  $\delta$  137.5 (d,  $J = 2.9$  Hz,  $\text{OPN}$ ), 23.4 (d,  $J = 2.9$  Hz,  $\text{PPh}_2$ ).

**HRMS** (ESI):  $[\text{C}_{41}\text{H}_{42}\text{NOP}_2]^+$ , calculated: 626.2736, found: 626.2741.

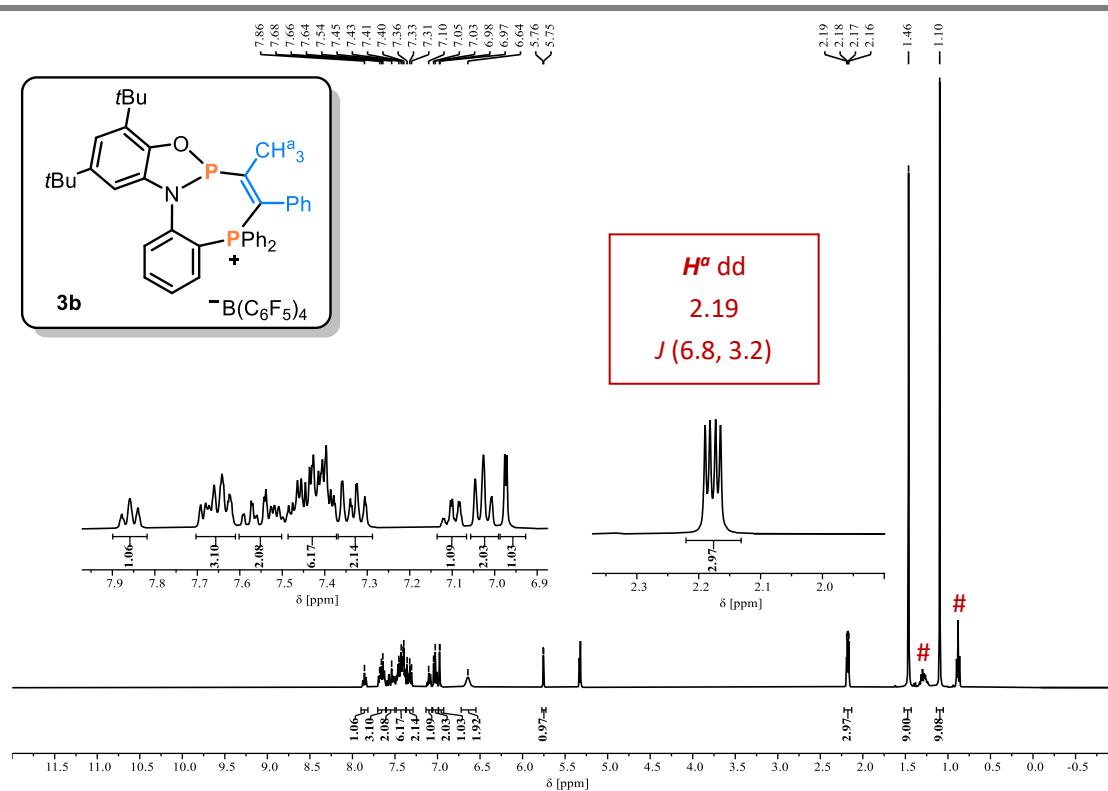

Figure S19:  $^1\text{H}$  NMR of **3b** (400 MHz,  $\text{CD}_2\text{Cl}_2$ ). # denotes pentane.

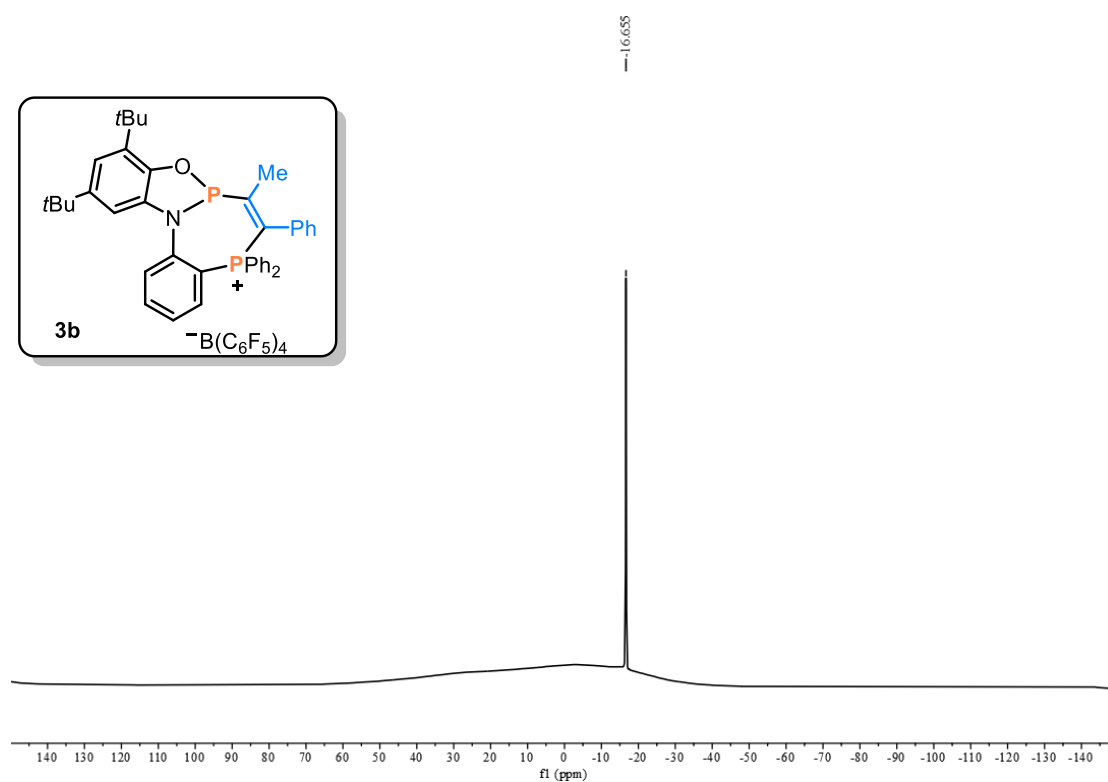

Figure S20:  $^{11}\text{B}$  NMR of **3b** (128 MHz,  $\text{CD}_2\text{Cl}_2$ ).

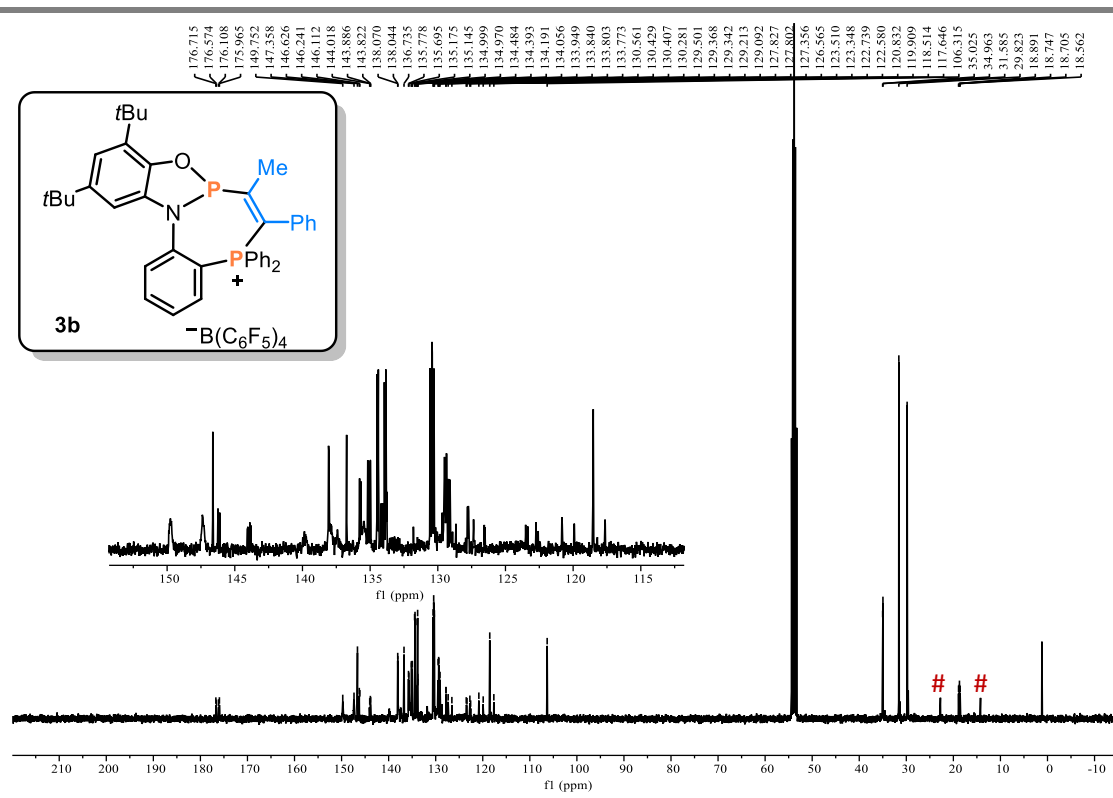

Figure S21:  $^{13}\text{C}\{^1\text{H}\}$  NMR of **3b** (101 MHz,  $\text{CD}_2\text{Cl}_2$ ). # denotes pentane.

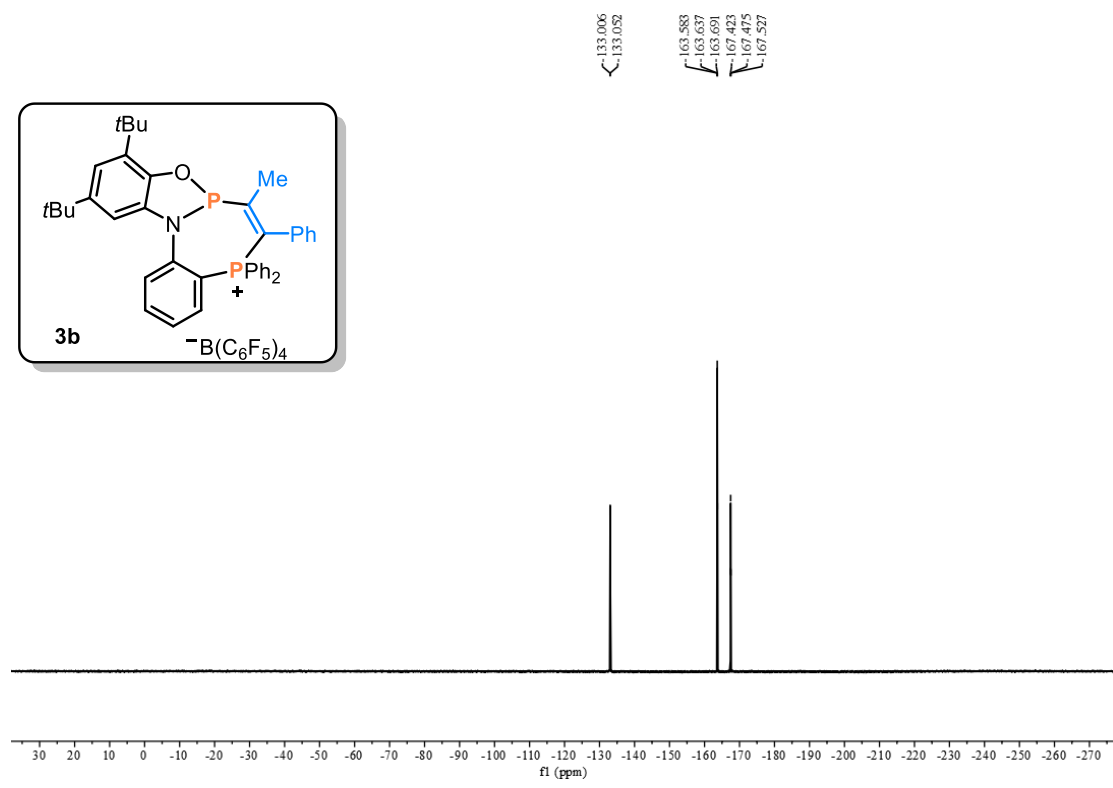

Figure S22:  $^{19}\text{F}$  NMR of **3b** (376 MHz,  $\text{CD}_2\text{Cl}_2$ ).

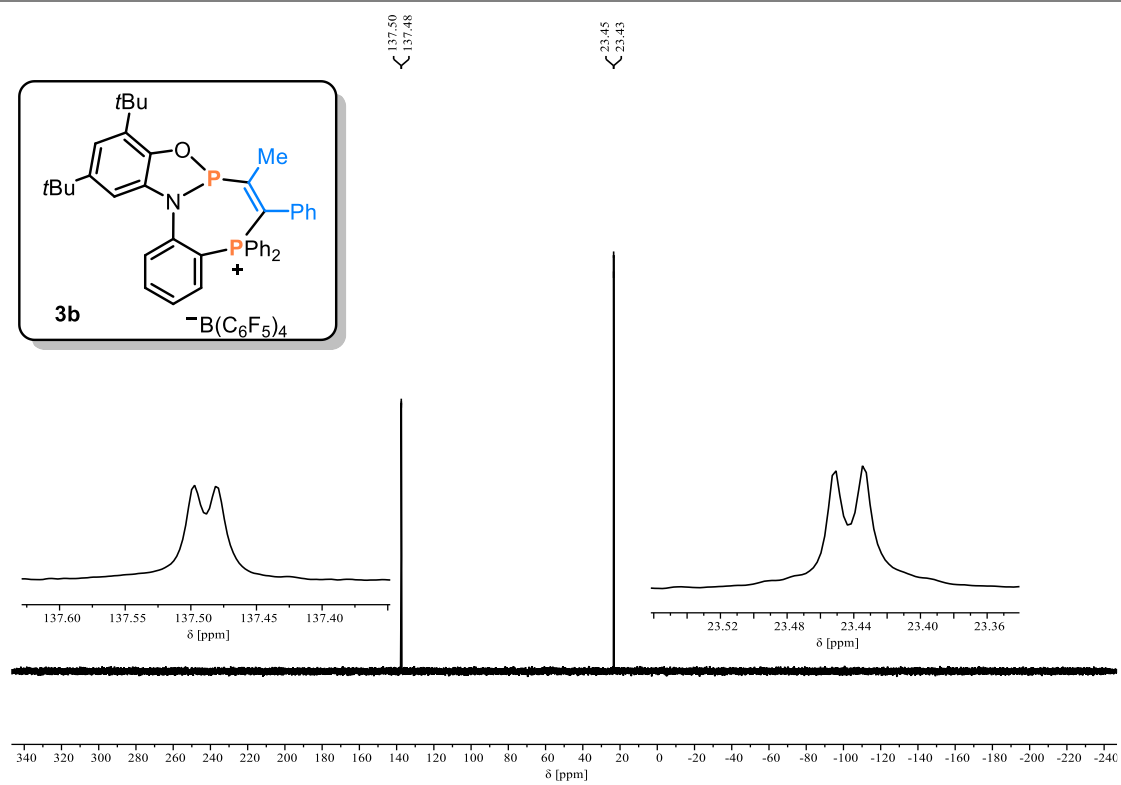

Figure S23:  $^{31}\text{P}\{^1\text{H}\}$  NMR of **3b** (162 MHz,  $\text{CD}_2\text{Cl}_2$ ).

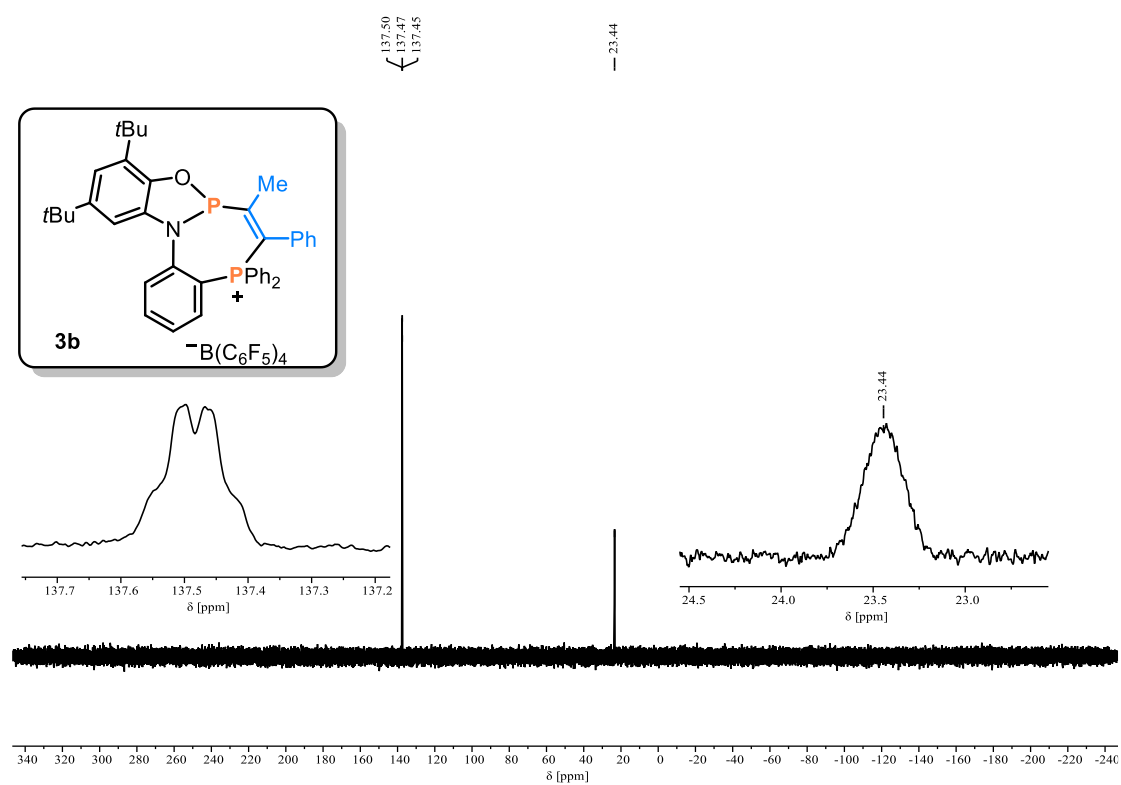

Figure S24:  $^{31}\text{P}$  NMR of **3b** (162 MHz,  $\text{CD}_2\text{Cl}_2$ ).

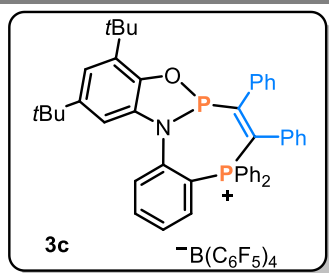

**2a** (100 mg, 84  $\mu\text{mol}$ , 1.0 equiv) was dissolved in 2 mL toluene, followed by the addition of diphenylacetylene (15 mg, 84  $\mu\text{mol}$ , 1.0 equiv). The mixture was stirred at 110  $^{\circ}\text{C}$  for 48 h. The solvent was then removed under reduced pressure and the solid was washed with pentane and dried *in vacuo* to give the product

**3c** as an orange solid (78.8 mg, 58  $\mu\text{mol}$ , 69 %).

**$^1\text{H}$  NMR** (400 MHz,  $\text{CD}_2\text{Cl}_2$ ):  $\delta$  7.97 – 7.85 (m, 1H), 7.75 – 7.65 (m, 2H), 7.59 – 7.48 (m, 8H), 7.45 – 7.36 (m, 5H), 7.31 (ddd,  $J = 4.5, 3.1, 1.9$  Hz, 3H), 7.23 (dd,  $J = 7.5, 2.2$  Hz, 2H), 6.92 – 6.85 (m, 2H), 6.84 – 6.77 (m, 2H), 5.60 (d,  $J = 2.0$  Hz, 1H), 1.10 (s, 9H), 1.07 (s, 9H).

**$^{11}\text{B}$  NMR** (128 MHz,  $\text{CD}_2\text{Cl}_2$ ):  $\delta$  -16.6.

**$^{13}\text{C}\{^1\text{H}\}$  NMR** (101 MHz,  $\text{CD}_2\text{Cl}_2$ ):  $\delta$  177.9 (dd,  $J = 69.1, 15.2$  Hz, 1C), 149.9 – 149.5 (m, BArF<sub>20</sub>), 147.4 – 147.1 (m, BArF<sub>20</sub>), 146.4 (s, 1C), 145.5 (d,  $J = 13.7$  Hz, 1C), 143.5 (dd,  $J = 19.3, 6.2$  Hz, 1C), 140.0 – 139.7 (m, BArF<sub>20</sub>), 138.4 (d,  $J = 2.8$  Hz, 1C), 138.1 – 137.7 (m, BArF<sub>20</sub>), 137.6 – 137.2 (m, BArF<sub>20</sub>), 136.7 (s, 1C), 136.0 (d,  $J = 8.4$  Hz, 1C), 135.8 (s, 1C), 135.6 (d,  $J = 4.3$  Hz, 2C), 135.5 (d,  $J = 3.1$  Hz, 2C), 135.5 – 135.2 (m, BArF<sub>20</sub>), 134.9 (d,  $J = 13.4$  Hz, 2C), 134.8 (d,  $J = 3.4$  Hz, 2C), 134.2 (dd,  $J = 44.4, 9.0$  Hz, 1C), 134.1 (d,  $J = 3.0$  Hz, 2C), 131.9 (s, 1C), 130.5 (dd,  $J = 49.9, 13.1$  Hz, 1C), 129.6 (s, 2C), 129.5 (s, 2C), 129.3 (s, 1C), 128.9 (d,  $J = 2.4$  Hz, 2C), 128.8 (dd,  $J = 5.3, 2.2$  Hz, 1C), 128.4 (dd,  $J = 8.4, 2.5$  Hz, 1C), 128.3 (d,  $J = 6.3$  Hz, 1C), 123.6 (dd,  $J = 78.1, 17.7$  Hz, 1C), 121.3 (d,  $J = 3.8$  Hz, 1C), 120.4 (d,  $J = 4.0$  Hz, 1C), 118.5 (s, 1C), 118.1 (d,  $J = 1.7$  Hz, 1C), 117.2 (d,  $J = 1.7$  Hz, 1C), 105.7 (s, 1C), 35.0 (s, 1C), 34.6 (s, 1C), 31.6 (s, 3C), 29.3 (s, 3C).

**$^{19}\text{F}$  NMR** (376 MHz,  $\text{CD}_2\text{Cl}_2$ ):  $\delta$  -132.9 – -133.1 (m), -163.6 (t,  $J = 20.4$  Hz), -167.5 (t,  $J = 19.5$  Hz).

**$^{31}\text{P}\{^1\text{H}\}$  NMR** (162 MHz,  $\text{CD}_2\text{Cl}_2$ ):  $\delta$  137.9 (d,  $J = 9.0$  Hz, OPN), 23.6 (d,  $J = 9.0$  Hz, PPh<sub>2</sub>).

**HRMS** (ESI):  $[\text{C}_{46}\text{H}_{44}\text{NOP}_2]^+$ , calculated: 688.2893, found: 688.2894.

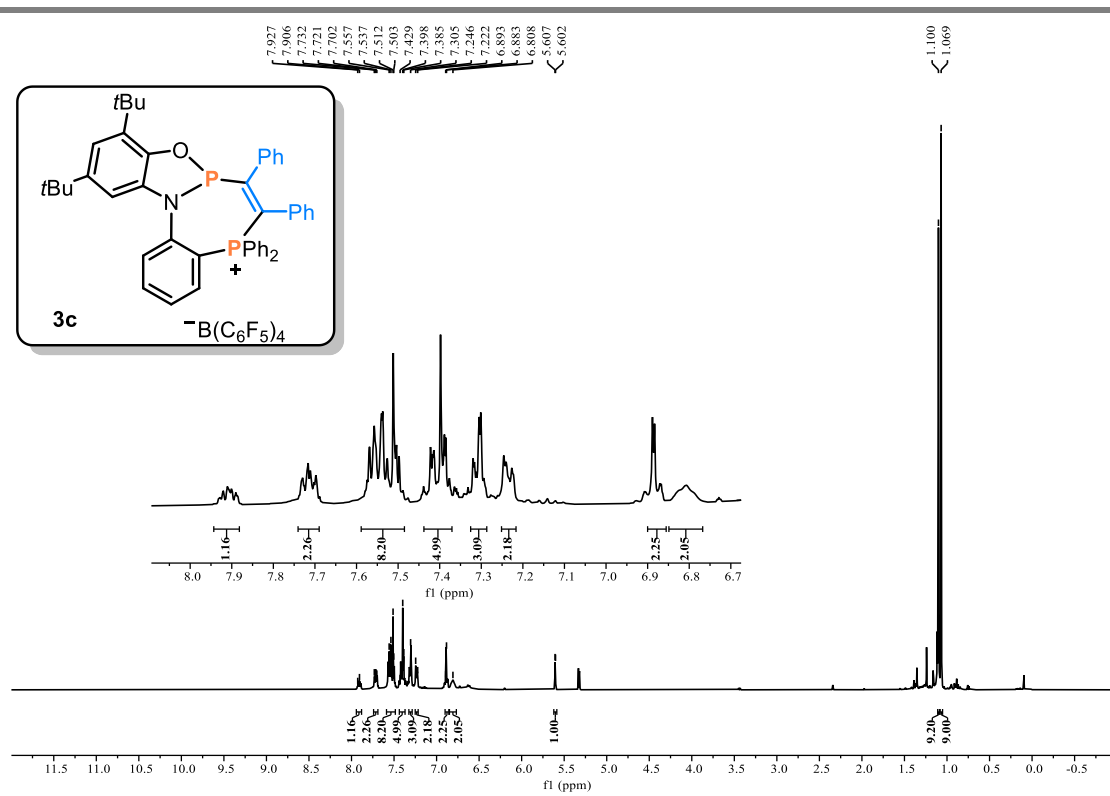

Figure S25:  $^1\text{H}$  NMR of **3c** (400 MHz,  $\text{CD}_2\text{Cl}_2$ ).

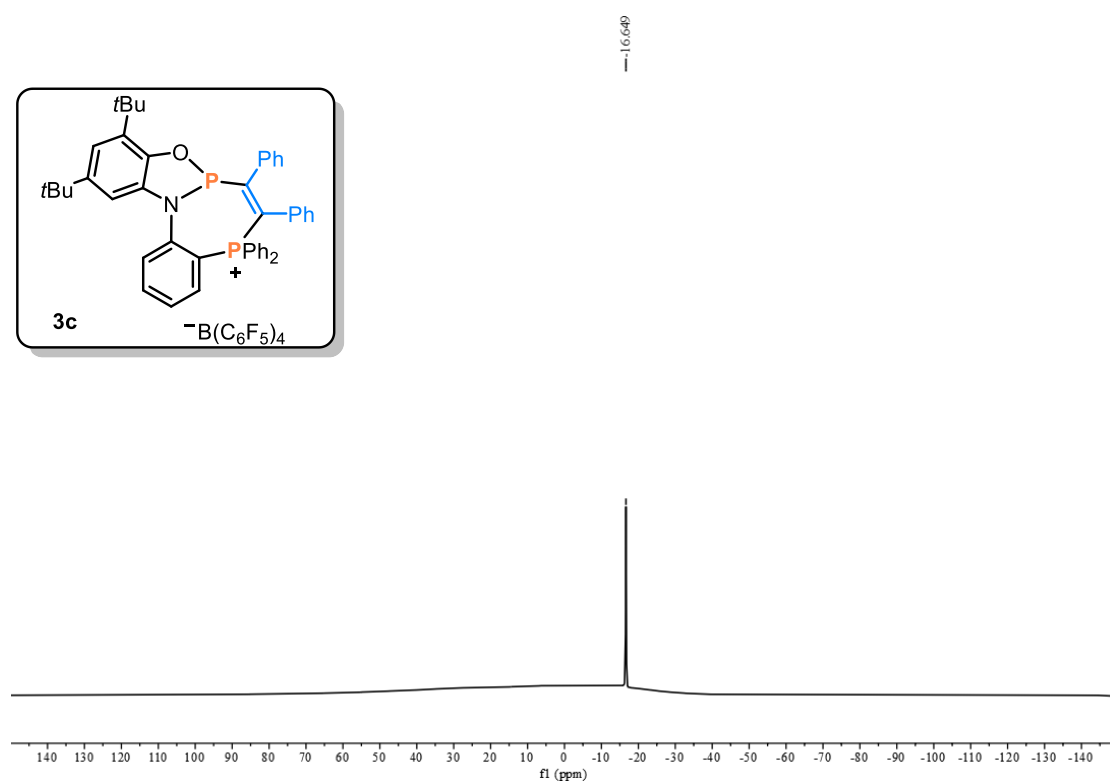

Figure S26:  $^{11}\text{B}$  NMR of **3c** (128 MHz,  $\text{CD}_2\text{Cl}_2$ ).



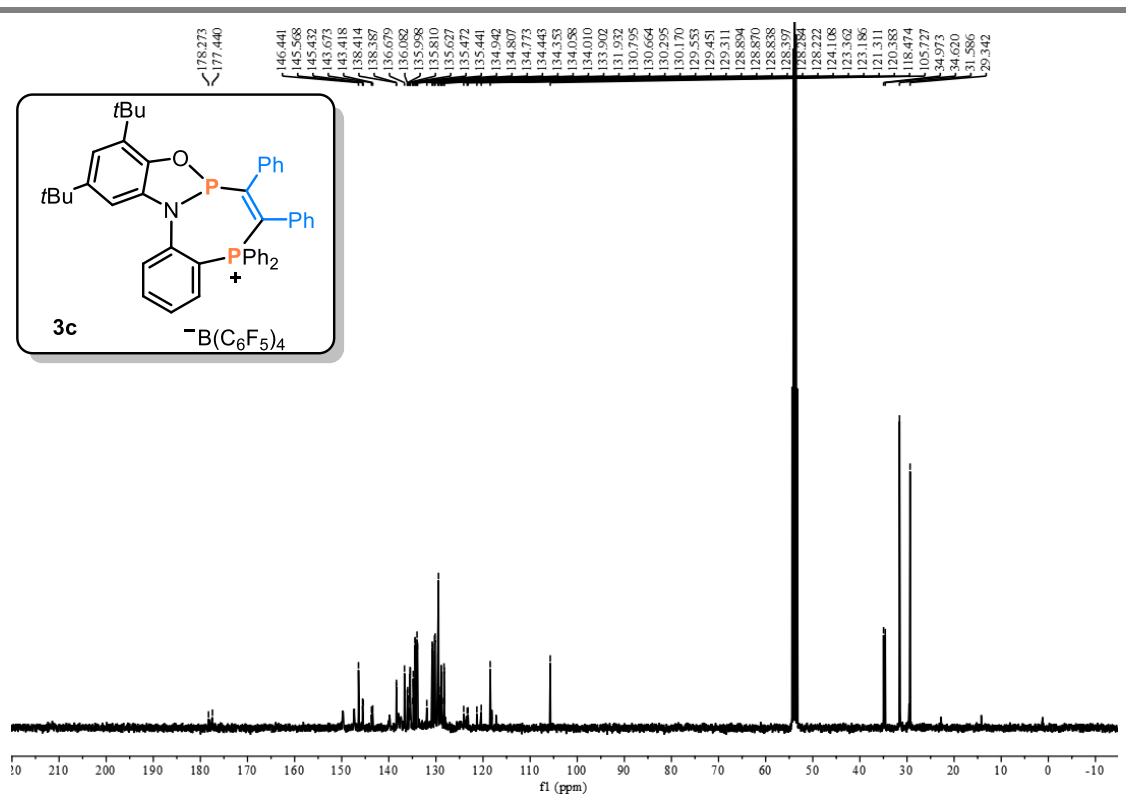

Figure S27:  $^{13}\text{C}\{^1\text{H}\}$  NMR of **3c** (101 MHz,  $\text{CD}_2\text{Cl}_2$ ).

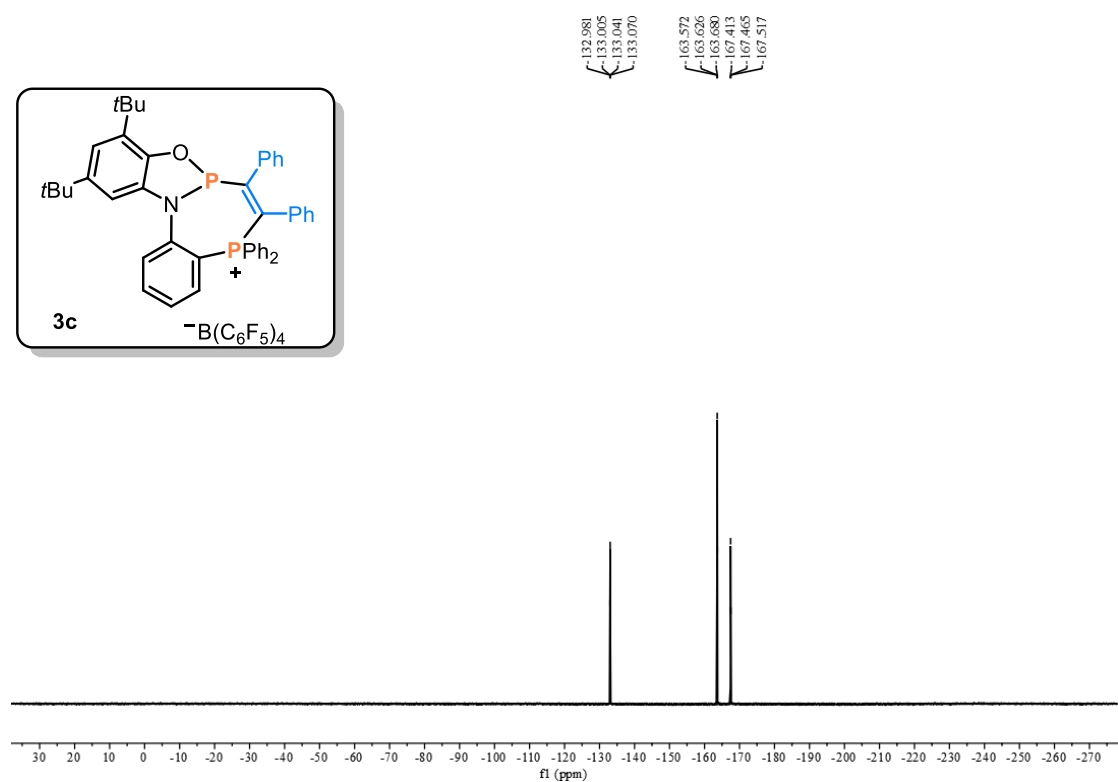

Figure S28:  $^{19}\text{F}$  NMR of **3c** (376 MHz,  $\text{CD}_2\text{Cl}_2$ ).

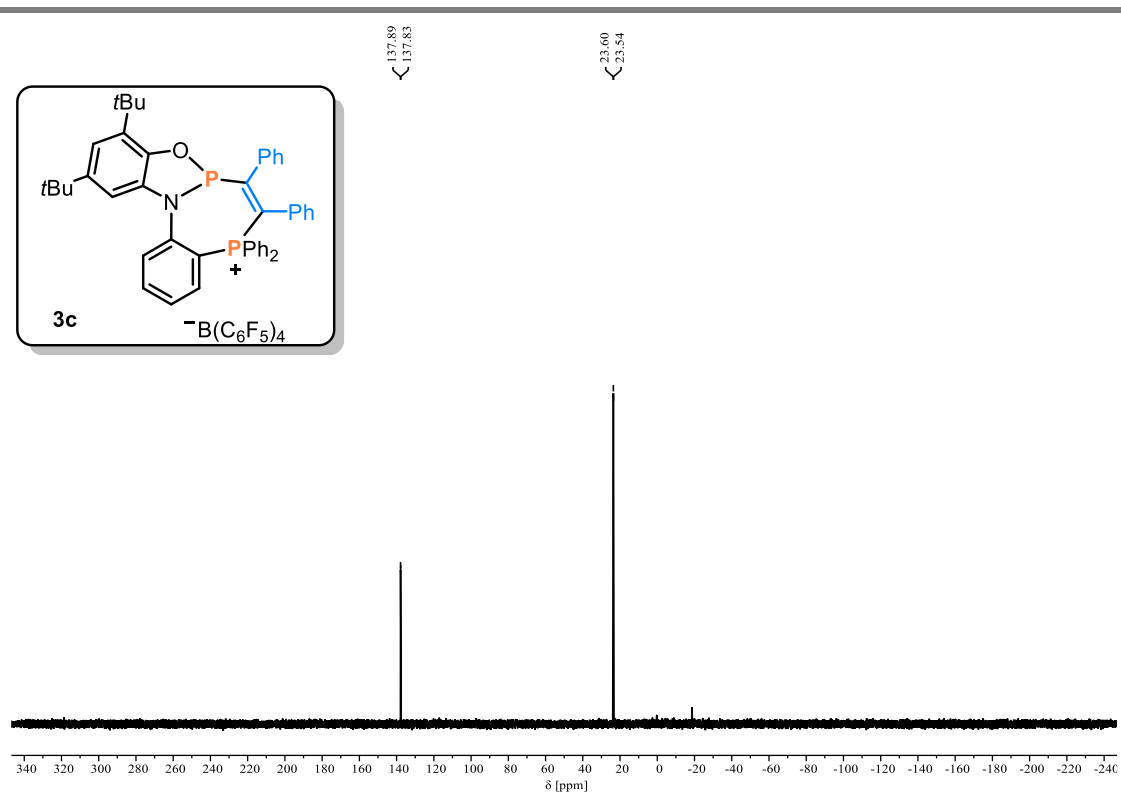

Figure S29:  $^{31}\text{P}\{^1\text{H}\}$  NMR of **3c** (162 MHz,  $\text{CD}_2\text{Cl}_2$ ).

## 4. Phosphinophosphination of Alkenes

### 4.1 Reaction development

#### 4.1.1 Styrene

The yellow phosphonium salt **2a** (15 mg, 12.6  $\mu\text{mol}$ , 1.0 equiv) and styrene (2.6 mg, 25.2  $\mu\text{mol}$ , 2.0 equiv) were weighed into a J. Young type NMR tube, followed by the addition of  $\text{CD}_2\text{Cl}_2$  (0.5 mL). The multinuclear NMR data revealed four doublets corresponding to a set of diastereomers in a 4:1 ratio. The major one has two doublets at 160.4 and 29.0 ppm ( $^3J_{\text{PP}} = 14.1$  Hz) while the minor one has two doublets at 153.7 and 32.4 ppm (Scheme S1). Single crystals XRD confirmed the structure of the major diastereomer.

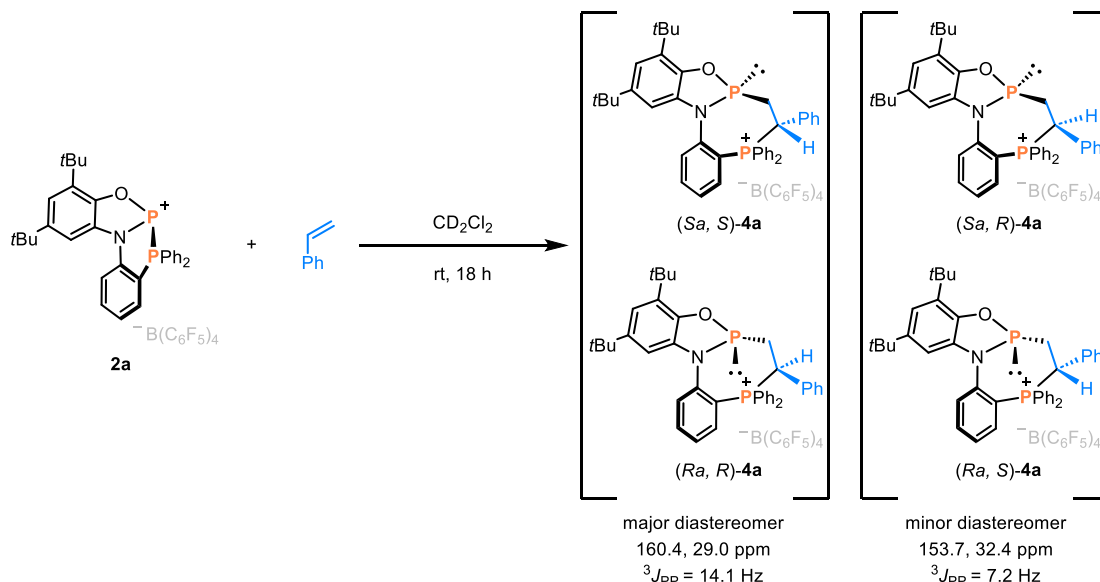

**Scheme S1:** 4 stereoisomers for the likely product of **2a** with styrene.

#### 4.1.2 *cis*-Stilbene and *trans*-stilbene

Further, *cis*-stilbene and *trans*-stilbene were investigated. In such case, there should be 8 stereoisomers in total for the product (Scheme S2).

**General procedure:** The yellow phosphonium salt **2a** (15 mg, 12.6  $\mu\text{mol}$ , 1.0 equiv) and stilbene (2.3 mg, 12.6  $\mu\text{mol}$ , 1.0 equiv) were weighed into a J. Young type NMR tube. Then 0.5 mL  $\text{CD}_2\text{Cl}_2$  was added and the tube was subjected into heating plate at 60  $^\circ\text{C}$  for 48 h. The solutions probed by  $^1\text{H}$  and  $^{31}\text{P}$  NMR.

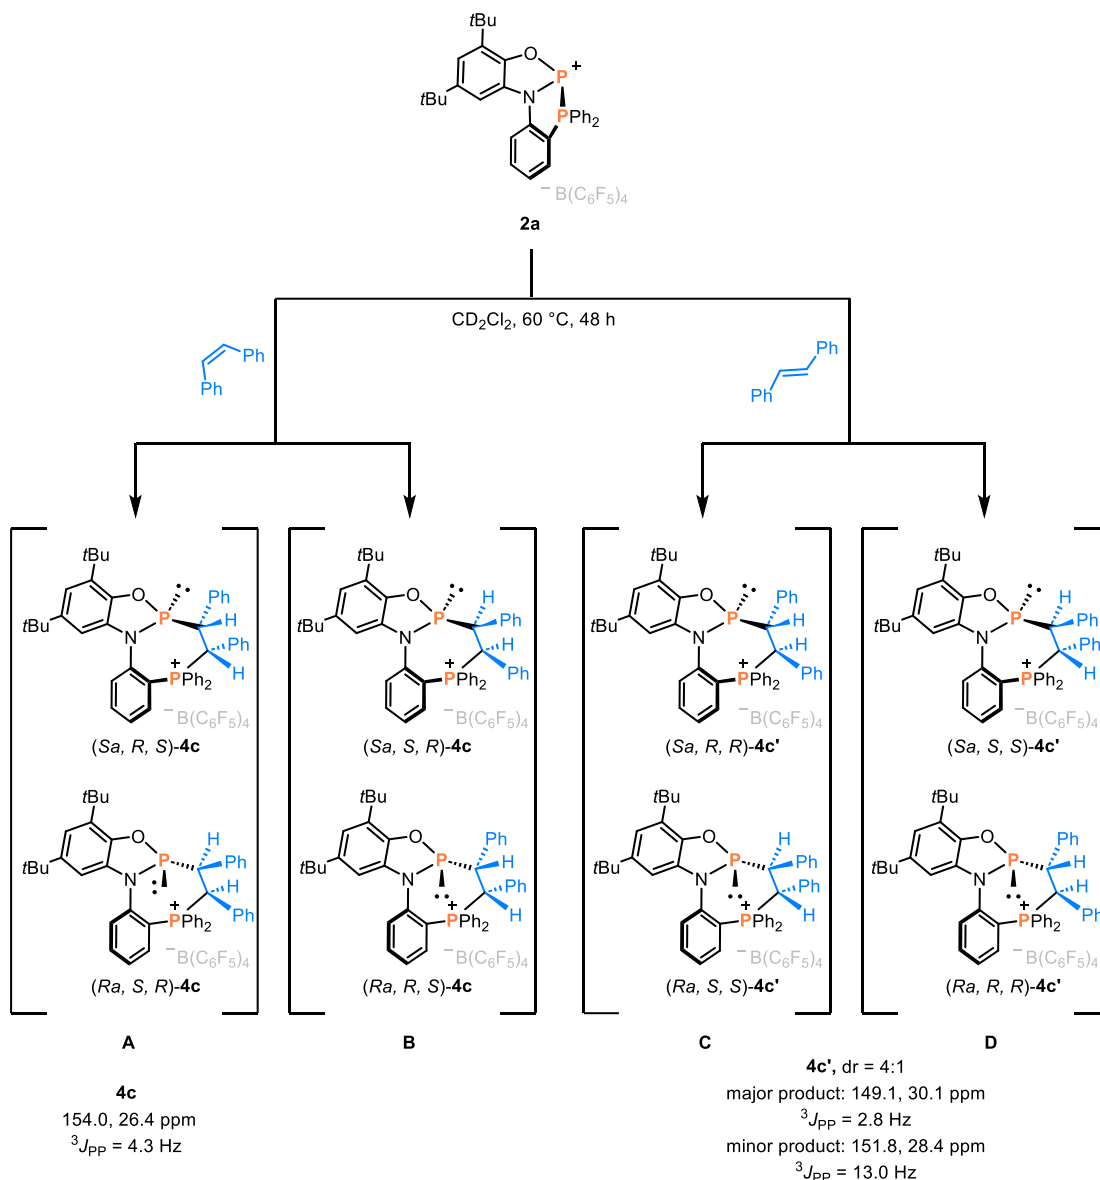

**Scheme S2:** 8 stereoisomers for the likely product of **2a** with stilbene.

For the reaction of **2a** with *cis*-stilbene, no starting materials remained and in  $^{31}\text{P}$  NMR, two doublets appeared at 154.0 and 26.4 ppm ( $^3J_{\text{PP}} = 4.3$  Hz). Single crystals XRD confirmed the structure as racemate **A**. Under the analogous conditions the recovery yield of **2a** was 33% while the yields of the two products were 53% and 14%, in an approximate ratio of 4:1 (Figure S30). In the  $^{31}\text{P}$  NMR, the major product has two resonances at 149.1 and 30.1 ppm ( $^3J_{\text{PP}} = 2.8$  Hz) and the minor product has two doublets at 151.8 and 28.4 ppm ( $^3J_{\text{PP}} = 13.0$  Hz), which are the mixture of racemates **C** and **D** (Scheme S2 and Figure S31).

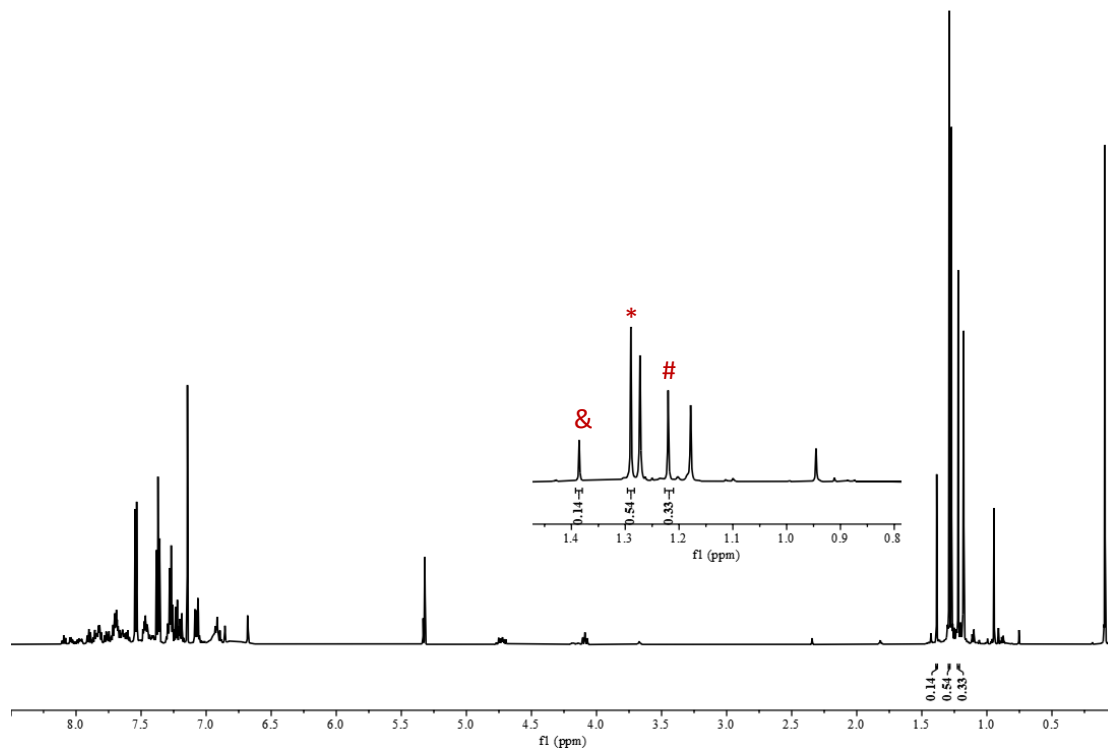

**Figure S30:**  $^1\text{H}$  NMR of **2a** with *trans*-stilbene. & denotes signals of minor diastereomer. \* denotes signals of major diastereomer. # denotes signals of phosphonium cation **2a**.

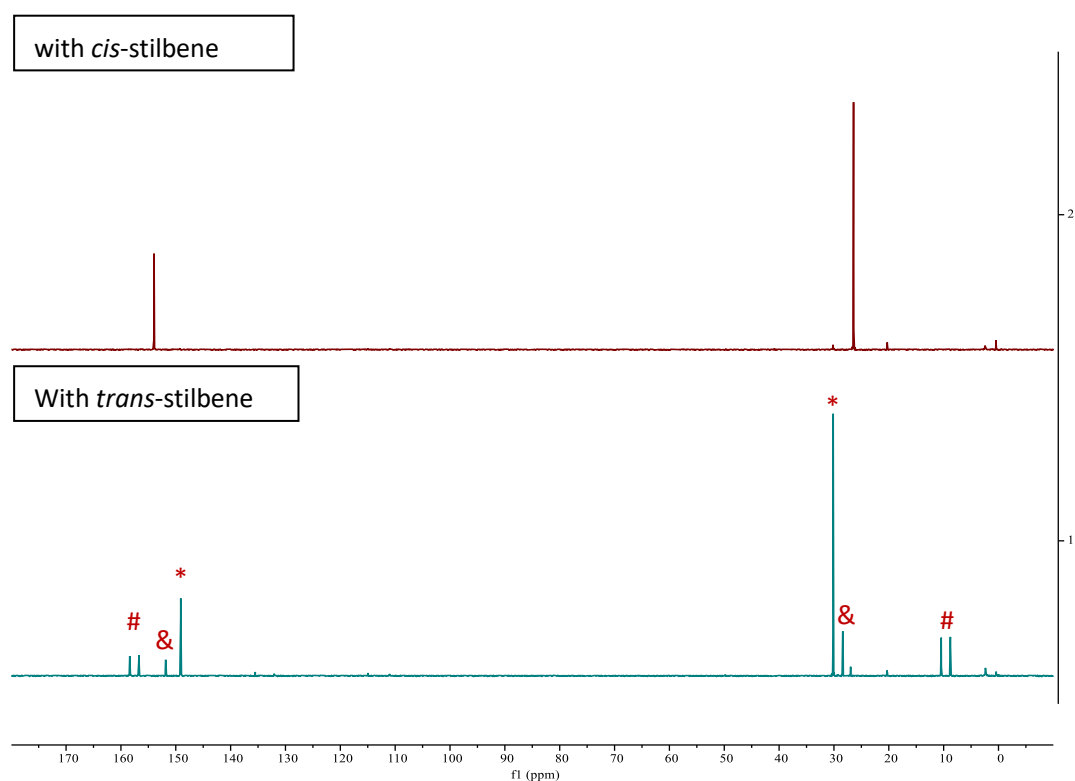

**Figure S31:** Stacked  $^{31}\text{P}\{^1\text{H}\}$  NMR of **2a** with *cis*-stilbene (top) and *trans*-stilbene (bottom). # denotes signals of phosphonium cation **2a**. & denotes signals of minor diastereomer. \* denotes signals of major diastereomer.

## 4.2 Preparation of 4

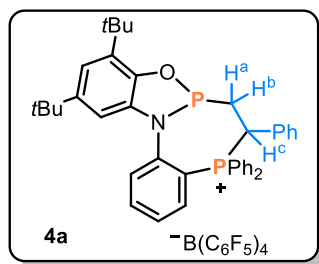

**2a** (100 mg, 84  $\mu\text{mol}$ , 1.0 equiv) was dissolved in 2 mL  $\text{CH}_2\text{Cl}_2$ , followed by the addition of styrene (15 mg, 168  $\mu\text{mol}$ , 2.0 equiv). The mixture was stirred at room temperature for 18 h. The solvent was then removed under reduced pressure and the solid was washed with pentane and dried *in vacuo* to give a set of diastereomers of product **4a** in a 4:1 ratio as a yellow solid (101.6 mg, 93% yield). Single crystals for major diastereomer suitable for X-ray diffraction were grown by gas phase diffusion of pentane into the  $\text{CH}_2\text{Cl}_2$  solution.

$^1\text{H}$  NMR (400 MHz,  $\text{CD}_2\text{Cl}_2$ ) *major diastereomer*:  $\delta$  7.99 (ddt,  $J = 8.7, 7.5, 1.6$  Hz, 1H), 7.86 (dd,  $J = 8.2, 5.1$  Hz, 1H), 7.75 – 7.63 (m, 2H), 7.57 (dtdd,  $J = 14.9, 7.4, 3.5, 1.2$  Hz, 3H), 7.52 – 7.45 (m, 2H), 7.40 – 7.30 (m, 6H), 7.27 (t,  $J = 10.4$  Hz, 2H), 6.88 (d,  $J = 2.0$  Hz, 1H), 6.75 (ddd,  $J = 11.9, 8.4, 1.3$  Hz, 2H), 6.16 (d,  $J = 2.0$  Hz, 1H), 4.40 (ddt,  $J = 20.1, 14.3, 5.0$  Hz, 1H,  $\text{PCH}^a\text{H}$ ), 2.76 (ddd,  $J = 12.8, 7.1, 5.3$  Hz, 1H,  $\text{PCH}^b\text{H}$ ), 2.58 (dtd,  $J = 37.4, 13.8, 4.7$  Hz, 1H,  $\text{CH}^c\text{Ph}$ ), 1.34 (s, 9H), 1.14 (s, 9H). *minor diastereomer*:  $\delta$  4.71 – 4.54 (m, 1H), 3.03 – 2.91 (m, 1H), 2.48 – 2.29 (m, 1H), 1.40 (s, 9H), 1.28 (s, 9H). The aromatic region protons of minor diastereomer could not be reliably assigned due to low intensity and an overlap of signals.

$^{11}\text{B}$  NMR (128 MHz,  $\text{CD}_2\text{Cl}_2$ ):  $\delta$  -16.7.

$^{13}\text{C}\{^1\text{H}\}$  NMR (101 MHz,  $\text{CD}_2\text{Cl}_2$ ) *major diastereomer*:  $\delta$  150.0 – 149.5 (m,  $\text{BArF}_{20}$ ), 147.6 – 147.1 (m,  $\text{BArF}_{20}$ ), 146.4 (s, 1C), 146.1 (d,  $J = 12.1$  Hz, 1C), 145.9 (dd,  $J = 24.4, 6.6$  Hz, 1C), 140.0 – 139.6 (m,  $\text{BArF}_{20}$ ), 138.4 (d,  $J = 2.7$  Hz, 1C), 138.2 (d,  $J = 8.2$  Hz, 1C), 138.1 – 137.7 (m,  $\text{BArF}_{20}$ ), 137.6 – 137.2 (m,  $\text{BArF}_{20}$ ), 136.9 (s, 1C), 135.6 (dd,  $J = 9.5, 3.0$  Hz, 1C), 135.5 – 135.2 (m,  $\text{BArF}_{20}$ ), 134.4 (d,  $J = 9.1$  Hz, 2C), 133.8 (d,  $J = 2.3$  Hz, 2C), 132.8 (d,  $J = 9.2$  Hz, 2C), 131.5 (dd,  $J = 11.3, 6.7$  Hz, 1C), 131.2 (d,  $J = 12.5$  Hz, 1C), 130.4 (d,  $J = 2.8$  Hz, 1C), 130.2 (s, 1C), 130.1 (d,  $J = 11.1$  Hz, 2C), 129.5 (d,  $J = 2.9$  Hz, 2C), 129.4 (dd,  $J = 2.1, 7.9$  Hz, 1C), 128.7 (d,  $J = 12.0$  Hz, 1C), 120.0 (d,  $J = 3.6$  Hz, 1C), 119.2 (d,  $J = 3.5$  Hz, 1C), 118.9 (s, 1C), 118.4 (s, 1C), 118.1 (s, 1C), 117.6 (s, 1C), 106.8 (s, 1C), 39.6 (dd,  $J = 44.8, 5.3$  Hz, 1C), 39.4 (d,  $J = 45.8$  Hz, 1C), 35.0 (s, 1C), 34.8 (s, 1C), 31.7 (s, 3C), 29.5 (s, 3C). The minor

diastereomer signals could not be reliably assigned due to low intensity and an overlap of signals.

$^{19}\text{F}$  NMR (376 MHz,  $\text{CD}_2\text{Cl}_2$ ):  $\delta$  -133.0 – -133.2 (m), -163.7 (t,  $J = 20.2$  Hz), -167.5 (t,  $J = 19.1$  Hz).

$^{31}\text{P}\{^1\text{H}\}$  NMR (162 MHz,  $\text{CD}_2\text{Cl}_2$ ):  $\delta$  160.4 (d,  $J = 14.1$  Hz, major diastereomer, *OPN*), 153.7 (d,  $J = 7.2$  Hz, minor diastereomer, *OPN*), 32.4 (d,  $J = 7.2$  Hz, minor diastereomer, *PPh*<sub>2</sub>), 29.0 (d,  $J = 14.1$  Hz, major diastereomer, *PPh*<sub>2</sub>).

HRMS (ESI):  $[\text{C}_{40}\text{H}_{42}\text{NOP}_2]^+$ , calculated: 614.2736, found: 614.2738.

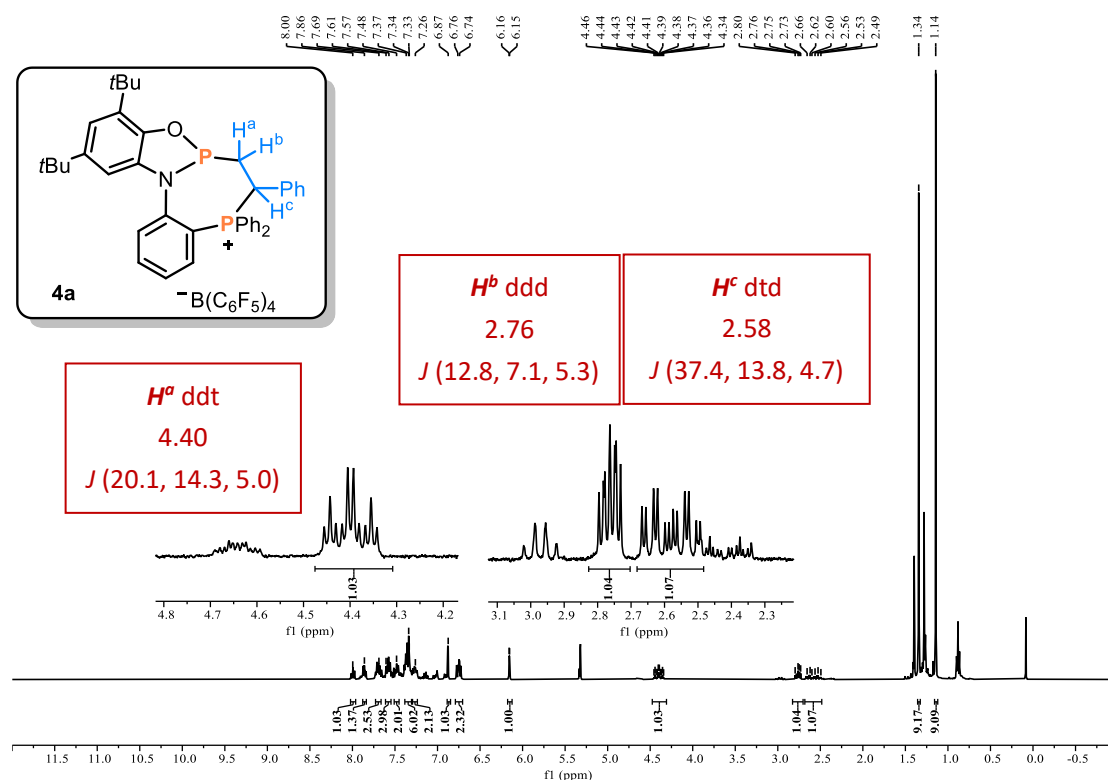

Figure S32:  $^1\text{H}$  NMR of **4a** (400 MHz,  $\text{CD}_2\text{Cl}_2$ ), Only peaks for major diastereomer are labeled and integrated.

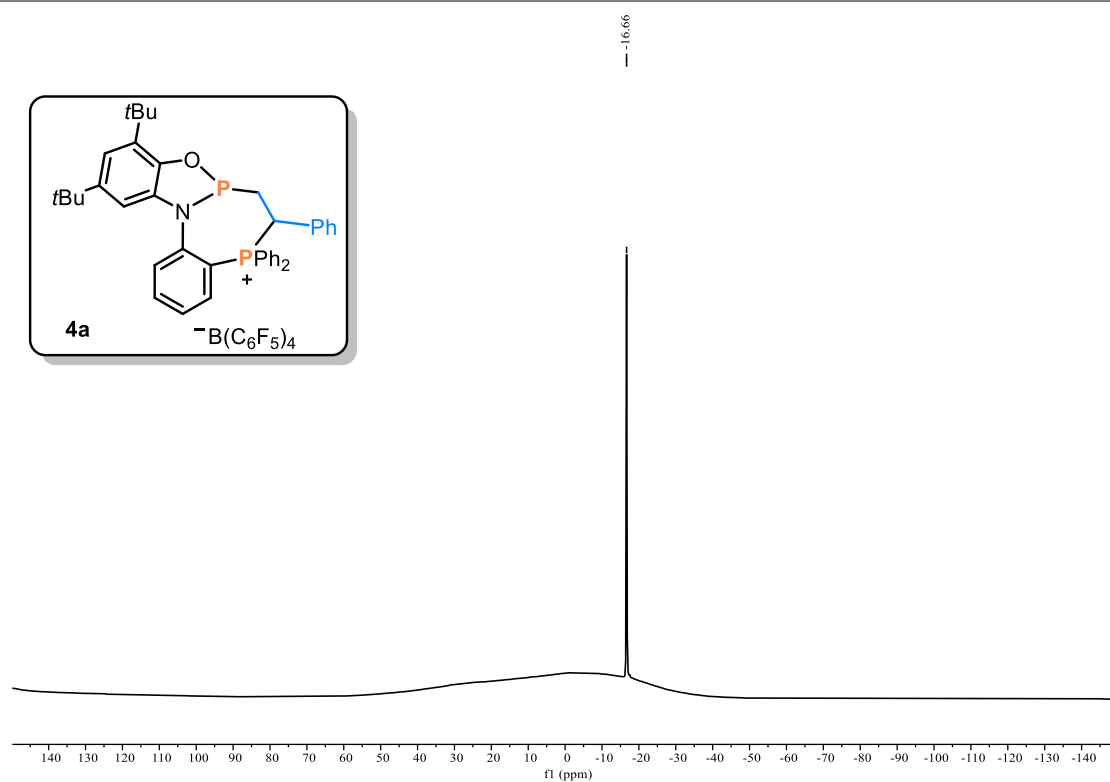

Figure S33:  $^{11}B$  NMR of **4a** (128 MHz,  $CD_2Cl_2$ ).

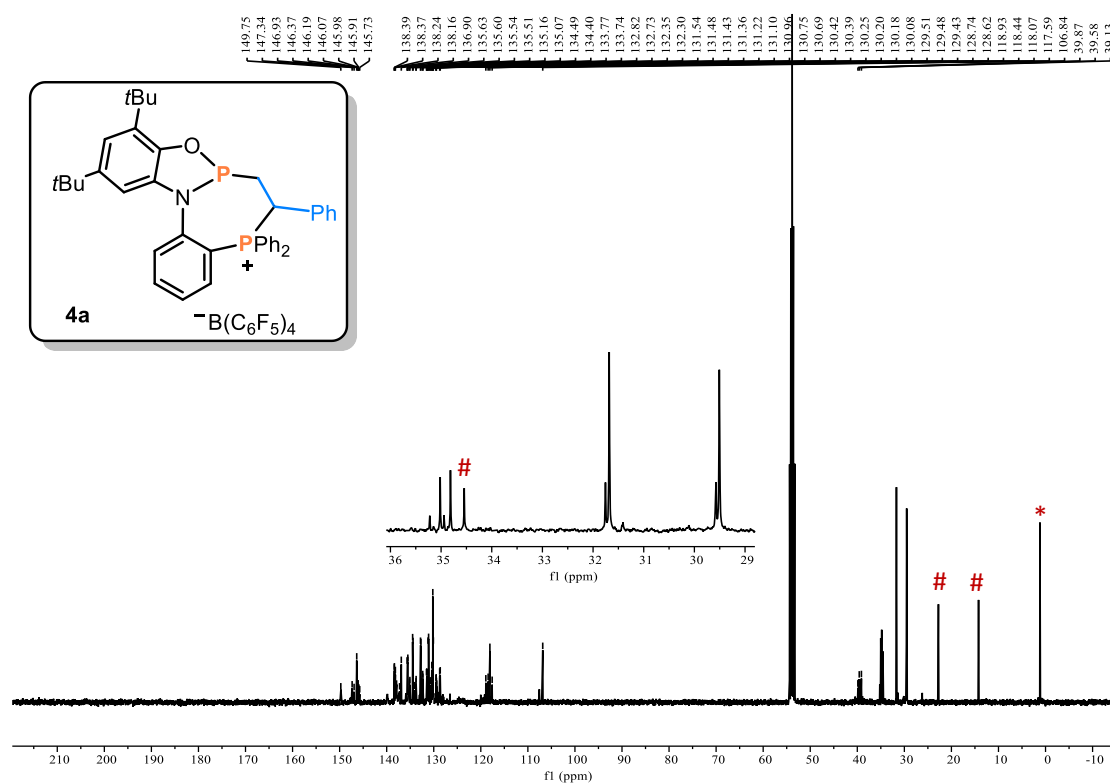

Figure S34:  $^{13}C\{^1H\}$  NMR of **4a** (101 MHz,  $CD_2Cl_2$ ), # denotes pentane and \* denotes silicone grease.



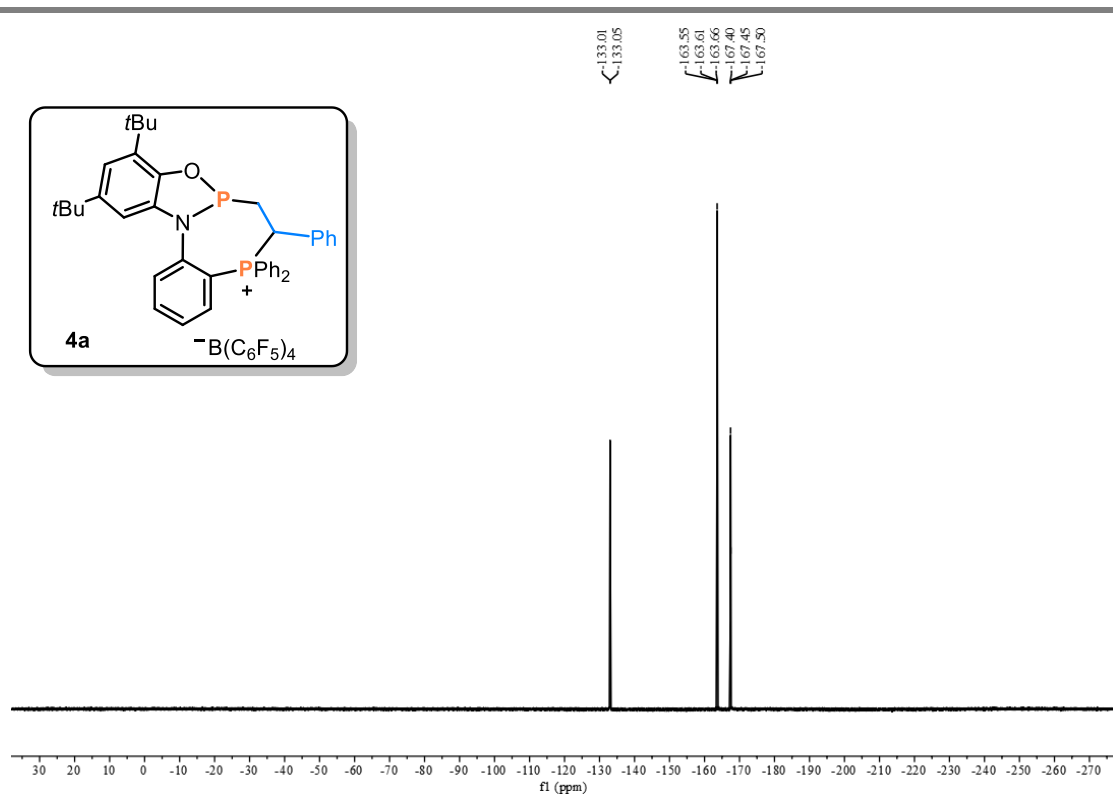

Figure S35:  $^{19}F$  NMR of **4a** (376 MHz,  $CD_2Cl_2$ ).

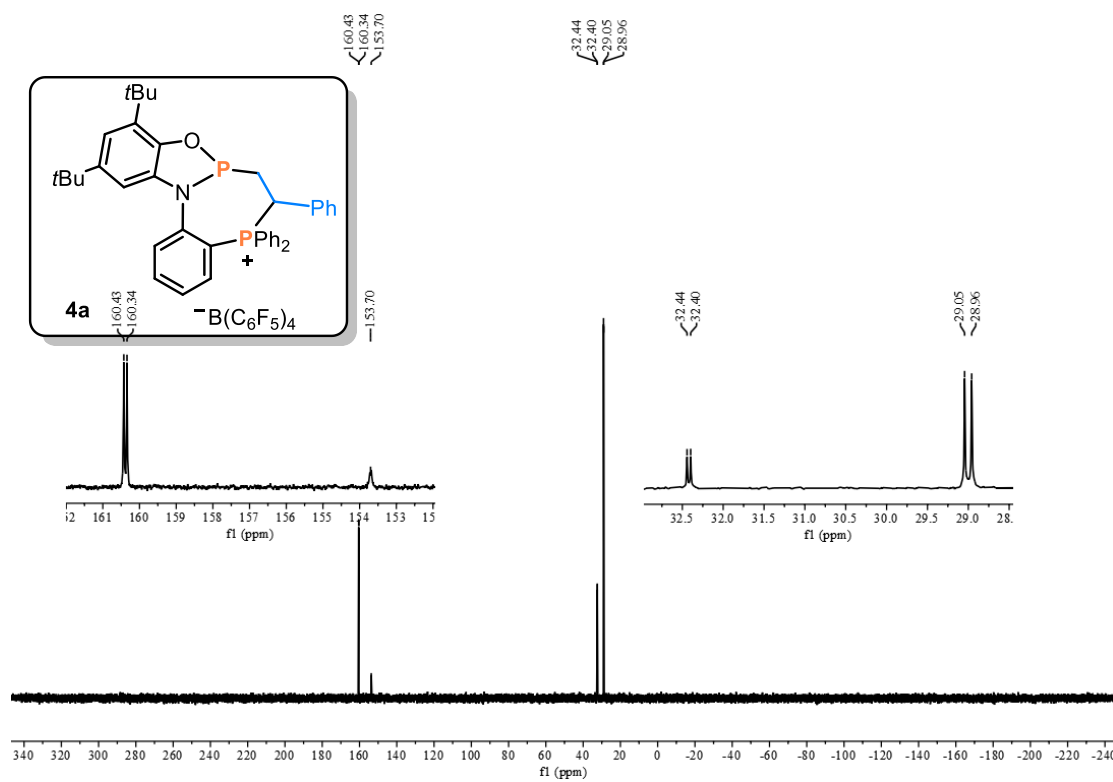

Figure S36:  $^{31}P\{^1H\}$  NMR of **4a** (162 MHz,  $CD_2Cl_2$ ).

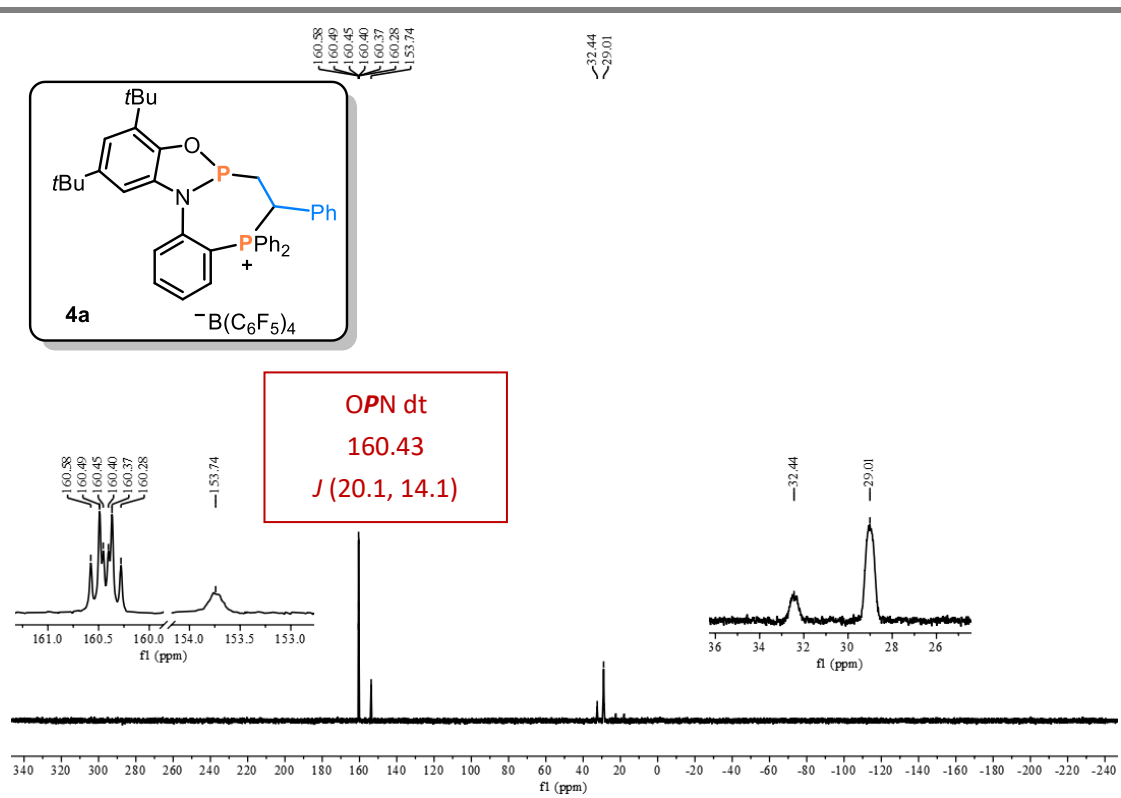

Figure S37:  $^{31}\text{P}$  NMR of **4a** (162 MHz,  $\text{CD}_2\text{Cl}_2$ ).

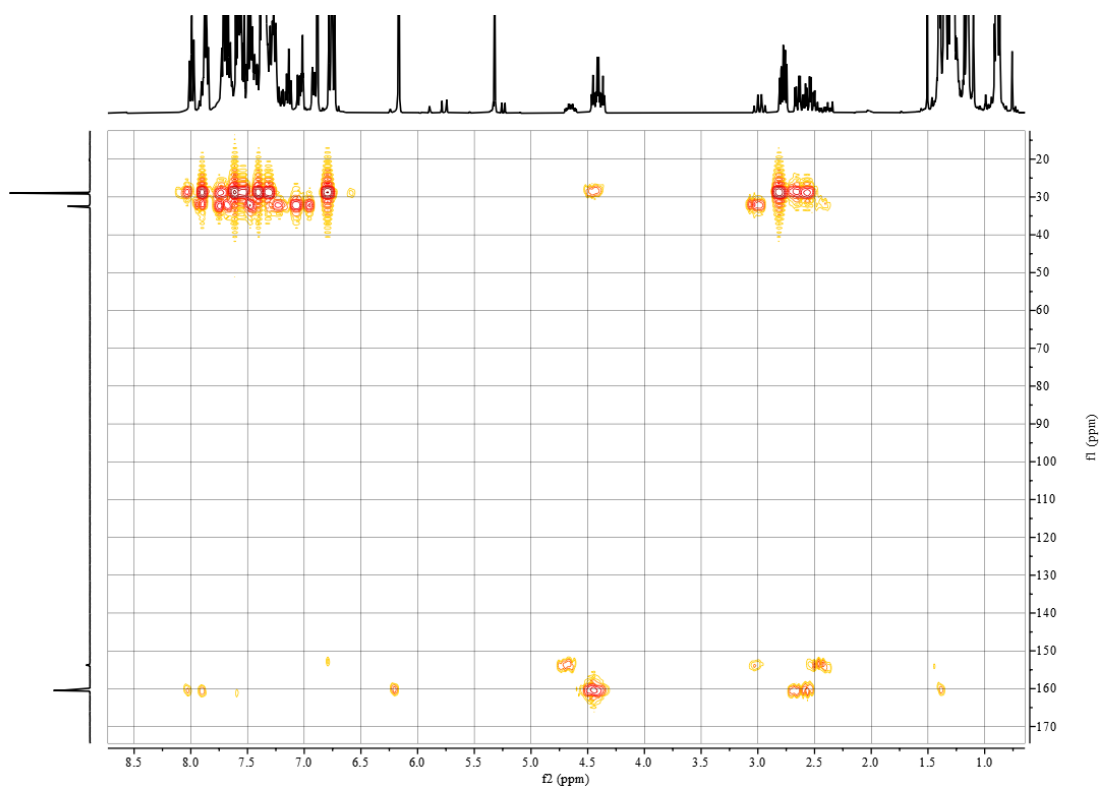

Figure S38:  $^1\text{H}$ - $^{31}\text{P}$  HMBC NMR of **4a** (162 MHz,  $\text{CD}_2\text{Cl}_2$ ).

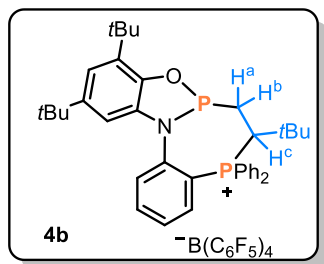

**2a** (200 mg, 168  $\mu\text{mol}$ , 1.0 equiv) was dissolved in 4 mL  $\text{CH}_2\text{Cl}_2$ , followed by the addition of 3,3-dimethyl-1-butene (42.4 mg, 504  $\mu\text{mol}$ , 3.0 equiv). The mixture was stirred at room temperature for 48 h. The solvent was then removed under reduced pressure and the solid was washed with pentane and

dried *in vacuo* to give the product **4b** as a yellow solid (180.8 mg, 84% yield). Single crystals suitable for X-ray diffraction were grown by gas phase diffusion of pentane into the  $\text{CH}_2\text{Cl}_2$  solution.

$^1\text{H NMR}$  (400 MHz,  $\text{CD}_2\text{Cl}_2$ ):  $\delta$  7.96 (ddq,  $J = 8.9, 7.2, 1.4$  Hz, 1H), 7.90 – 7.77 (m, 5H), 7.72 (dd,  $J = 7.8, 5.2$  Hz, 1H), 7.66 (tdd,  $J = 7.4, 3.4, 1.6$  Hz, 1H), 7.56 – 7.49 (m, 2H), 7.47 (ddd,  $J = 9.3, 5.1, 2.1$  Hz, 3H), 7.43 – 7.39 (m, 1H), 6.87 (d,  $J = 2.0$  Hz, 1H), 6.01 (d,  $J = 2.0$  Hz, 1H), 3.81 – 3.55 (m, 1H,  $\text{PCH}^a\text{H}$ ), 2.92 – 2.43 (m, 2H,  $\text{H}^b$  &  $\text{H}^c$ ), 1.46 (s, 9H), 1.14 (s, 9H), 0.80 (s, 9H).

$^{11}\text{B NMR}$  (128 MHz,  $\text{CD}_2\text{Cl}_2$ ):  $\delta$  -16.7.

$^{13}\text{C}\{^1\text{H}\}$  NMR (151 MHz,  $\text{CD}_2\text{Cl}_2$ ):  $\delta$  149.5 – 149.2 (m,  $\text{BArF}_{20}$ ), 147.9 – 147.6 (m,  $\text{BArF}_{20}$ ), 146.8 (d,  $J = 10.4$  Hz, 1C), 146.4 (s, 1C), 139.6 – 139.3 (m,  $\text{BArF}_{20}$ ), 138.0 – 137.7 (m,  $\text{BArF}_{20}$ ), 137.6 – 137.4 (m,  $\text{BArF}_{20}$ ), 137.5 (d,  $J = 2.5$  Hz, 2C), 136.6 (d,  $J = 3.1$  Hz, 1C), 136.3 (s, 1C), 136.0 – 135.9 (m,  $\text{BArF}_{20}$ ), 135.9 (d,  $J = 9.7$  Hz, 1C), 135.8 (d,  $J = 9.4$  Hz, 2C), 135.1 (d,  $J = 3.1$  Hz, 2C), 132.8 (d,  $J = 9.2$  Hz, 2C), 132.3 (dd,  $J = 7.4, 1.5$  Hz, 1C), 131.1 (d,  $J = 12.1$  Hz, 2C), 130.7 (d,  $J = 12.3$  Hz, 2C), 130.2 (d,  $J = 11.8$  Hz, 1C), 121.1 (s, 1C), 120.6 (s, 1C), 116.3 (s, 1C), 104.2 (s, 1C), 37.1 (s, 1C), 37.1 (d,  $J = 2.2$  Hz, 1C), 36.8 (s, 1C), 35.1 (s, 1C), 34.9 (s, 1C), 31.7 (s, 3C), 29.8 (s, 3C), 29.7 (d,  $J = 6.3$  Hz, 3C).

$^{19}\text{F NMR}$  (565 MHz,  $\text{CD}_2\text{Cl}_2$ ):  $\delta$  -130.3 – -136.2 (m), -163.6 (t,  $J = 20.4$  Hz), -167.5 (t,  $J = 19.2$  Hz).

$^{31}\text{P}\{^1\text{H}\}$  NMR (162 MHz,  $\text{CD}_2\text{Cl}_2$ ):  $\delta$  190.5 (br,  $\text{OPN}$ ), 31.4 (s,  $\text{PPh}_2$ ).

**HRMS** (ESI):  $[\text{C}_{38}\text{H}_{46}\text{NOP}_2]^+$ , calculated: 594.3049, found: 594.3053.

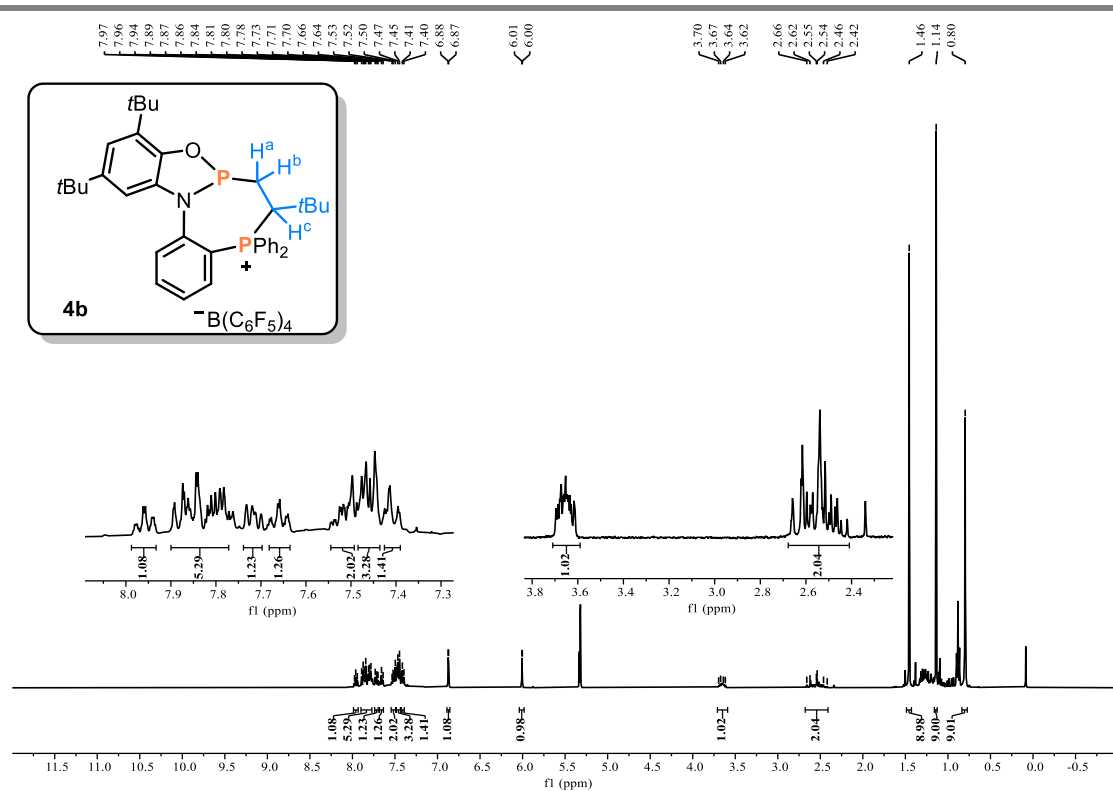

Figure S39:  $^1\text{H}$  NMR of **4b** (400 MHz,  $\text{CD}_2\text{Cl}_2$ ).

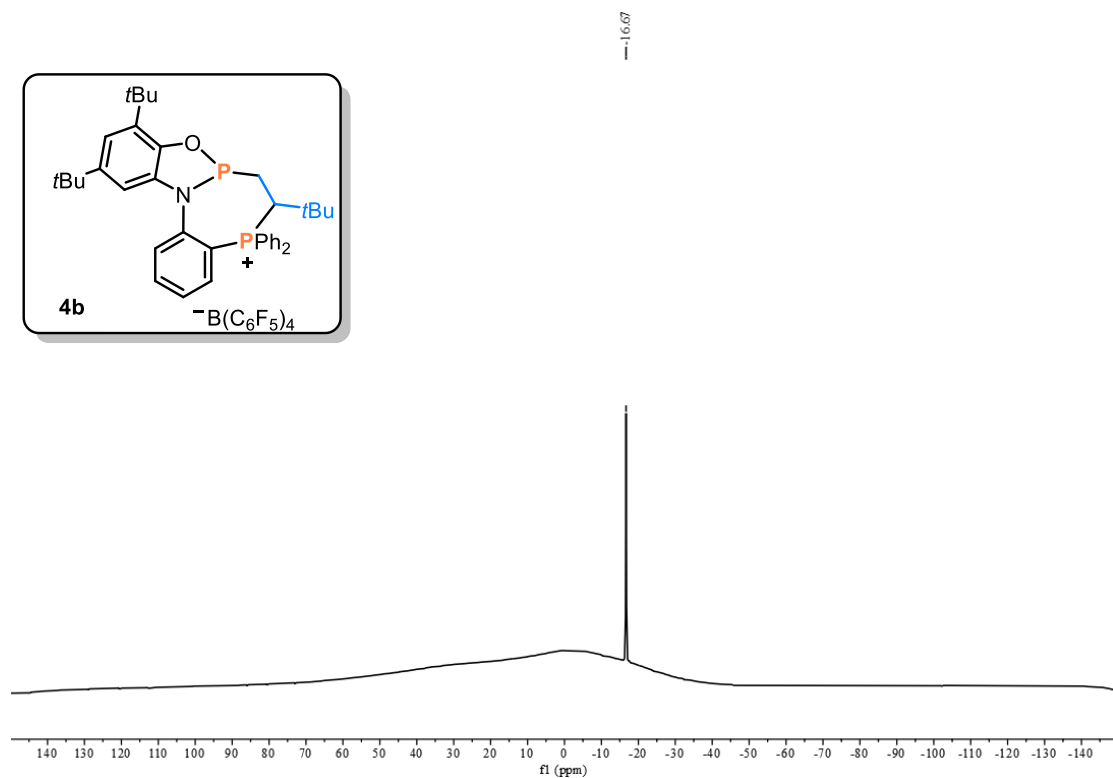

Figure S40:  $^{11}\text{B}$  NMR of **4b** (128 MHz,  $\text{CD}_2\text{Cl}_2$ ).

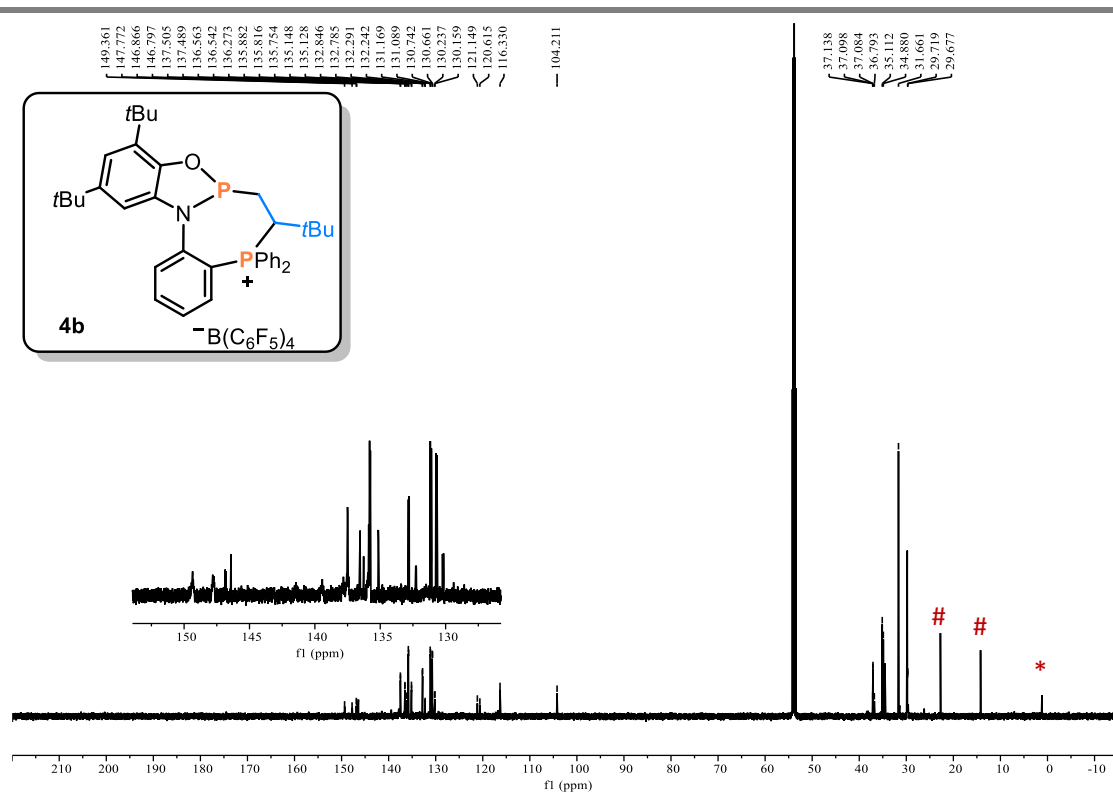

Figure S41: <sup>13</sup>C{<sup>1</sup>H} NMR of **4b** (151 MHz, CD<sub>2</sub>Cl<sub>2</sub>). # denotes pentane and \* denotes silicone grease.

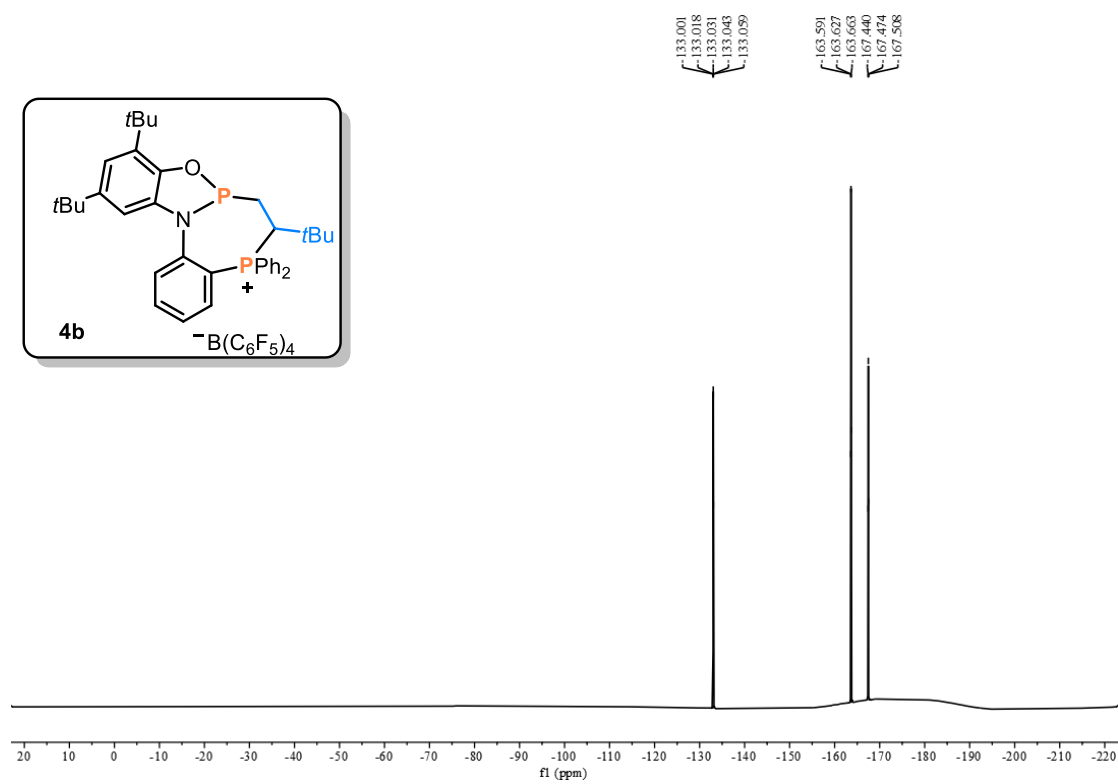

Figure S42: <sup>19</sup>F NMR of **4b** (565 MHz, CD<sub>2</sub>Cl<sub>2</sub>).

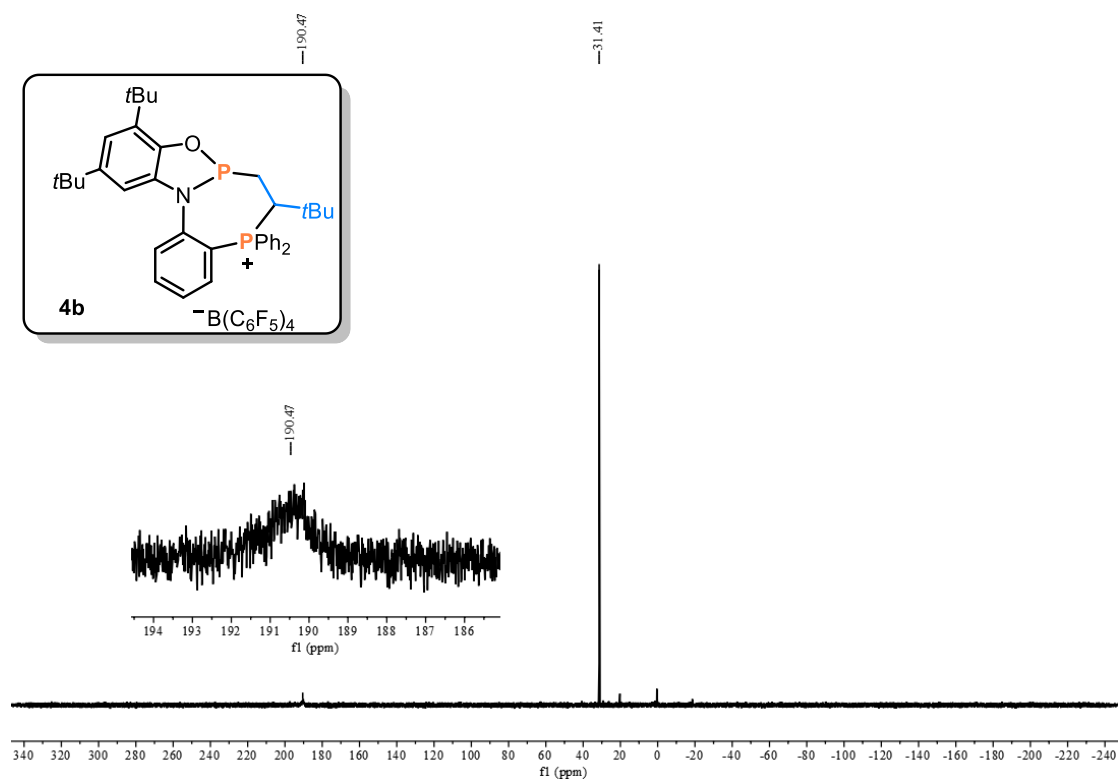

Figure S43:  $^{31}P\{^1H\}$  NMR of **4b** (162 MHz,  $CD_2Cl_2$ ).

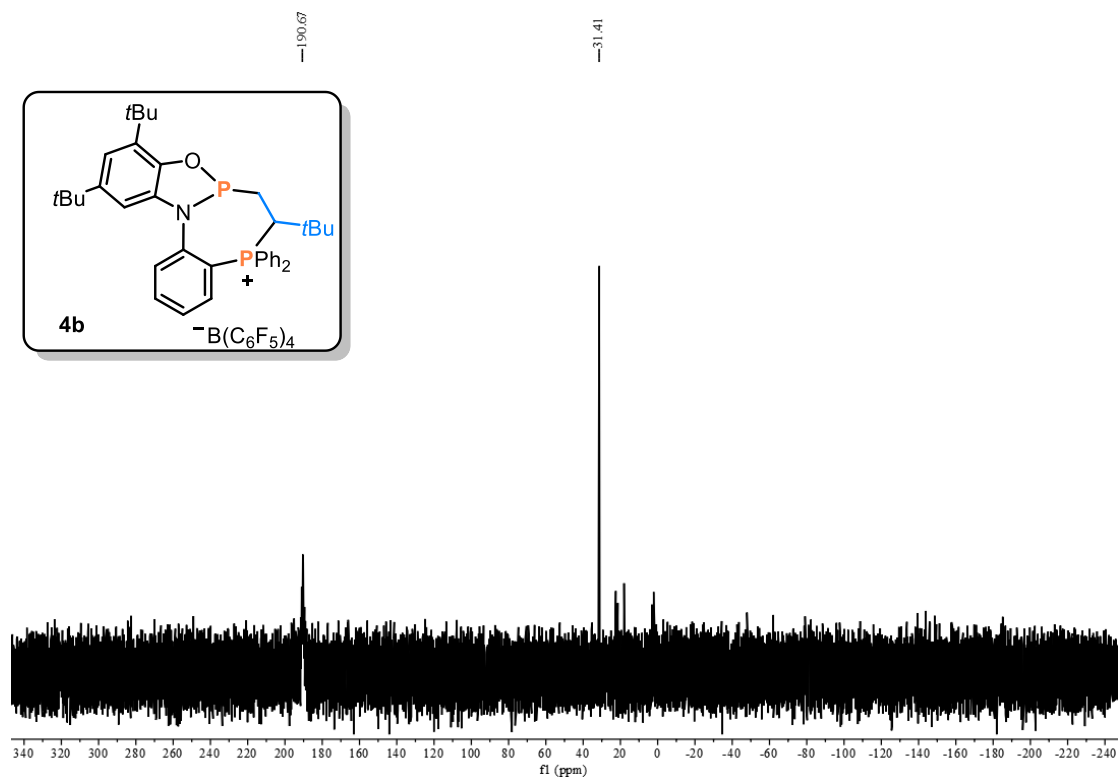

Figure S44:  $^{31}P$  NMR of **4b** (162 MHz,  $CD_2Cl_2$ ).

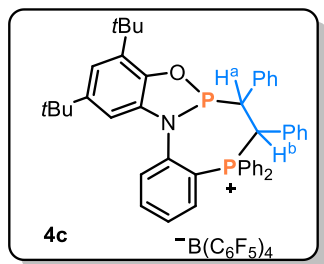

**2a** (300 mg, 252  $\mu\text{mol}$ , 1.0 equiv) was dissolved in 5 mL  $\text{CH}_2\text{Cl}_2$ , followed by the addition of *cis*-stilbene (45.5 mg, 252  $\mu\text{mol}$ , 1.0 equiv). The mixture was stirred at 60  $^\circ\text{C}$  for 48 h. The solvent was then removed under reduced pressure and the solid was washed with pentane and dried *in vacuo* to give product **4c** as a

yellow solid (301 mg, 87% yield). Single crystals suitable for X-ray diffraction were grown by gas phase diffusion of pentane into the solution of toluene and  $\text{CH}_2\text{Cl}_2$  (1:1).

**$^1\text{H}$  NMR** (400 MHz,  $\text{CD}_2\text{Cl}_2$ ):  $\delta$  8.13 – 8.02 (m, 1H), 7.98 – 7.86 (m, 1H), 7.82 – 7.74 (m, 1H), 7.72 – 7.49 (m, 8H), 7.47 – 7.35 (m, 3H), 7.30 – 7.23 (m, 3H), 7.23 – 7.11 (m, 3H), 6.88 – 6.75 (m, 3H), 6.54 (ddd,  $J = 11.8, 8.6, 1.3$  Hz, 2H), 6.11 (d,  $J = 2.0$  Hz, 1H), 4.36 (ddd,  $J = 19.8, 16.0, 4.2$  Hz, 1H,  $\text{PCH}^a\text{Ph}$ ), 3.90 (t,  $J = 4.2$  Hz, 1H,  $\text{PPh}_2\text{CH}^b\text{Ph}$ ), 1.13 (s, 9H), 1.08 (s, 9H).

**$^{11}\text{B}$  NMR** (128 MHz,  $\text{CD}_2\text{Cl}_2$ ):  $\delta$  -16.7.

**$^{13}\text{C}\{^1\text{H}\}$  NMR** (101 MHz,  $\text{CD}_2\text{Cl}_2$ ):  $\delta$  150.0 – 149.5 (m,  $\text{BArF}_{20}$ ), 147.5 – 147.2 (m,  $\text{BArF}_{20}$ ), 146.2 (s, 1C), 145.5 (dd,  $J = 16.5, 6.0$  Hz, 1C), 144.9 (d,  $J = 12.4$  Hz, 1C), 140.0 – 139.6 (m,  $\text{BArF}_{20}$ ), 138.8 (d,  $J = 2.6$  Hz, 1C), 138.5 (d,  $J = 8.3$  Hz, 1C), 138.1 – 137.7 (m,  $\text{BArF}_{20}$ ), 137.6 – 137.1 (m,  $\text{BArF}_{20}$ ), 136.8 (s, 1C), 135.6 (dd,  $J = 43.3, 3.1$  Hz, 1C), 135.6 – 135.2 (m,  $\text{BArF}_{20}$ ), 134.3 (d,  $J = 2.6$  Hz, 1C), 134.2 (d,  $J = 8.9$  Hz, 2C), 133.5 (dd,  $J = 16.2, 9.3$  Hz, 1C), 132.7 (d,  $J = 9.0$  Hz, 2C), 131.5 (d,  $J = 12.3$  Hz, 2C), 130.8 (d,  $J = 2.5$  Hz, 1C), 130.7 (dd,  $J = 8.0, 1.8$  Hz, 1C), 130.2 (d,  $J = 7.2$  Hz, 2C), 130.0 (d,  $J = 12.2$  Hz, 2C), 129.4 (s, 2C), 129.3 (dd,  $J = 11.3, 3.4$  Hz, 1C), 129.2 (d,  $J = 11.9$  Hz, 1C), 128.8 (s, 2C), 120.6 (d,  $J = 2.8$  Hz, 1C), 119.8 (d,  $J = 2.8$  Hz, 1C), 118.6 (s, 1C), 118.1 (d,  $J = 5.5$  Hz, 1C), 118.1 (s, 2C), 117.8 (s, 1C), 117.3 (s, 1C), 106.6 (s, 1C), 47.0 (d,  $J = 14.5$  Hz, 1C), 46.6 (d,  $J = 14.5$  Hz, 1C), 35.0 (s, 1C), 34.6 (s, 1C), 31.7 (s, 3C), 29.4 (s, 3C).

**$^{19}\text{F}$  NMR** (376 MHz,  $\text{CD}_2\text{Cl}_2$ ):  $\delta$  -129.3 – -136.9 (m), -163.6 (t,  $J = 20.4$  Hz), -167.4 (t,  $J = 19.4$  Hz).

**$^{31}\text{P}\{^1\text{H}\}$  NMR** (162 MHz,  $\text{CD}_2\text{Cl}_2$ ):  $\delta$  154.0 (d,  $J = 4.4$  Hz,  $\text{OPN}$ ), 26.4 (d,  $J = 4.3$  Hz,  $\text{PPh}_2$ ).

**HRMS** (ESI):  $[\text{C}_{46}\text{H}_{46}\text{ClNOP}_2]^+$ , calculated: 690.3049, found: 690.3054.

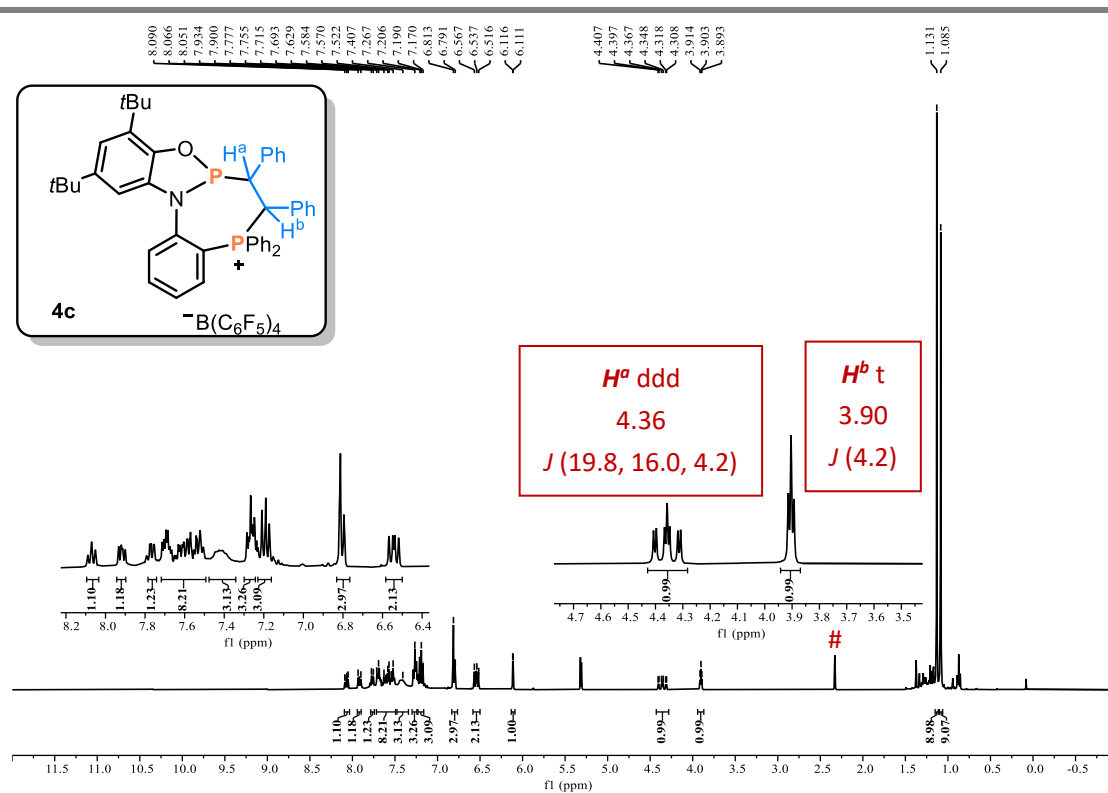

Figure S45: <sup>1</sup>H NMR of **4c** (400 MHz, CD<sub>2</sub>Cl<sub>2</sub>), # denotes toluene.

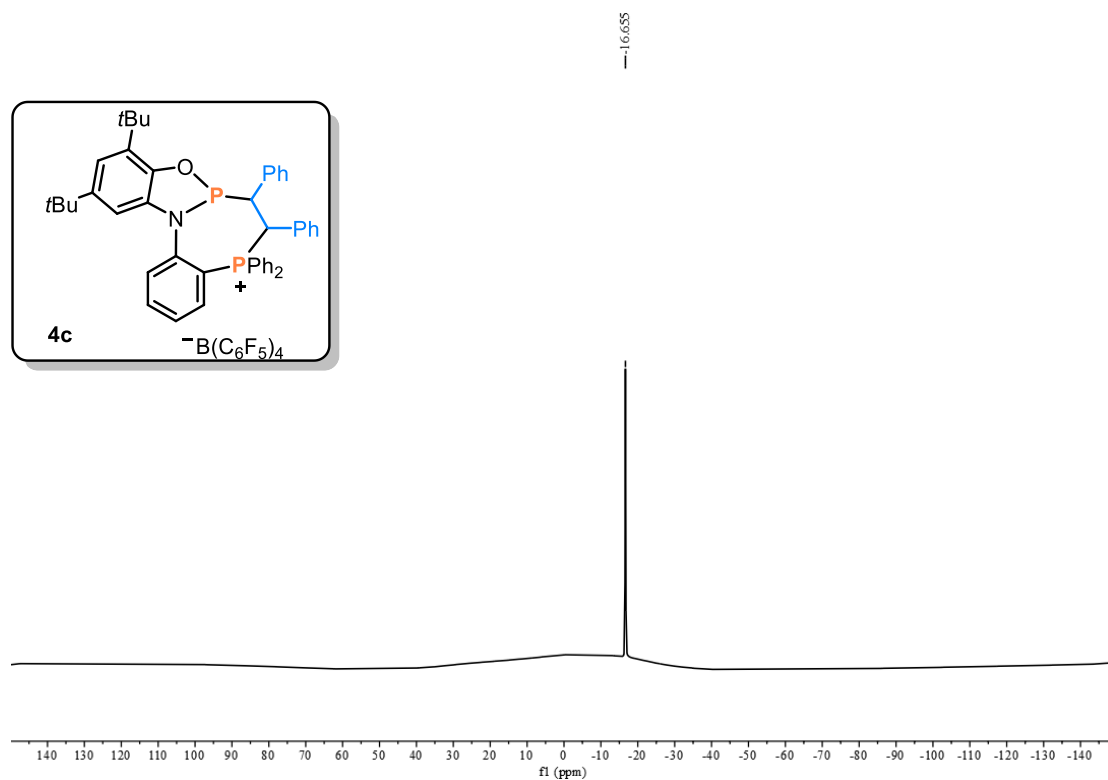

Figure S46: <sup>11</sup>B NMR of **4c** (128 MHz, CD<sub>2</sub>Cl<sub>2</sub>).



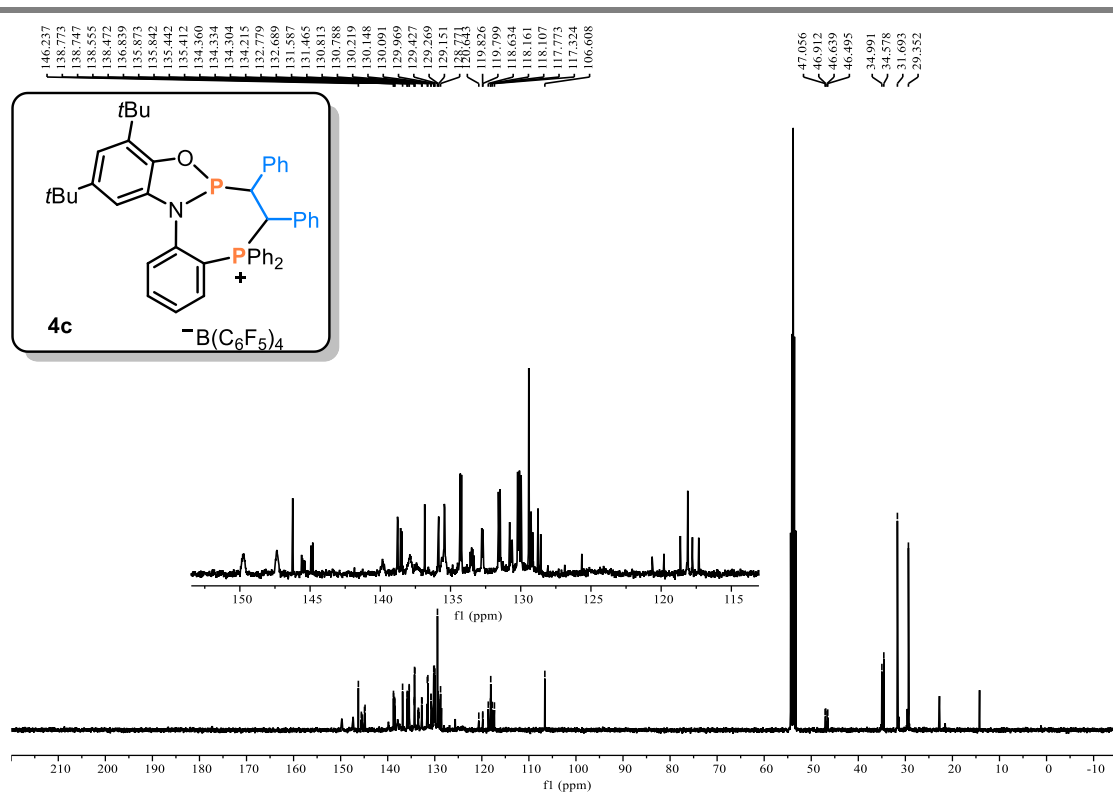

Figure S47:  $^{13}\text{C}\{^1\text{H}\}$  NMR of **4c** (101 MHz,  $\text{CD}_2\text{Cl}_2$ ).

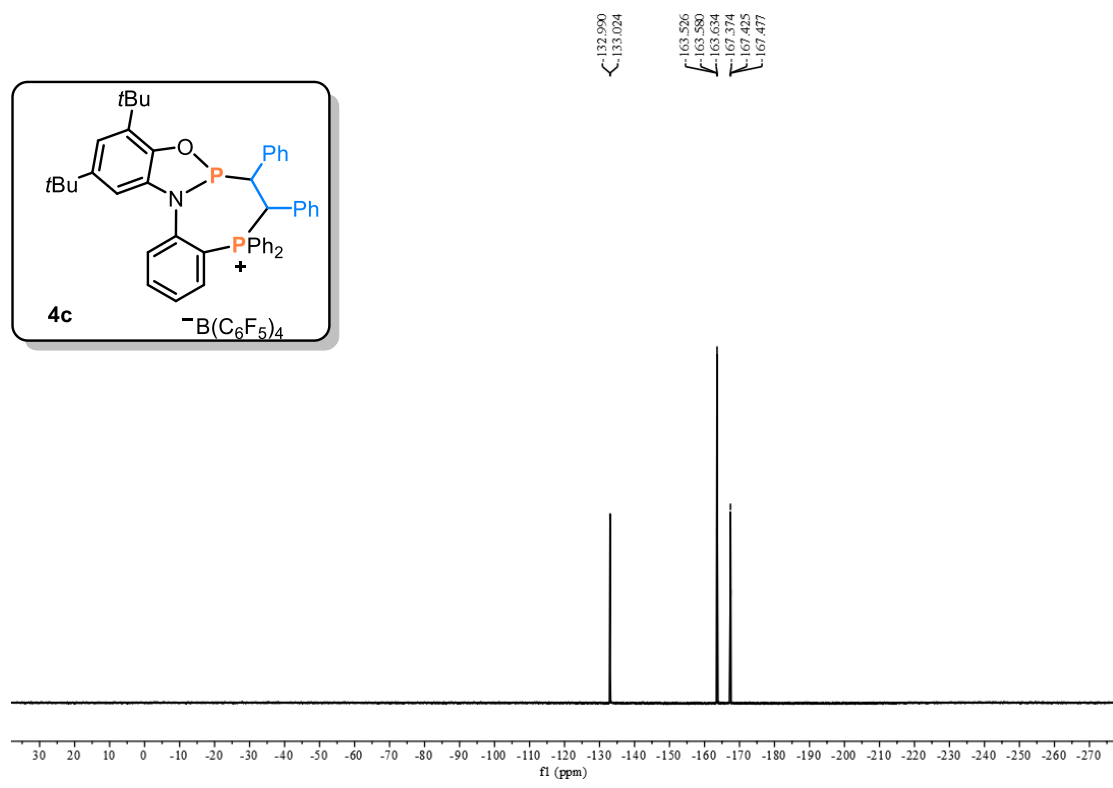

Figure S48:  $^{19}\text{F}$  NMR of **4c** (376 MHz,  $\text{CD}_2\text{Cl}_2$ ).

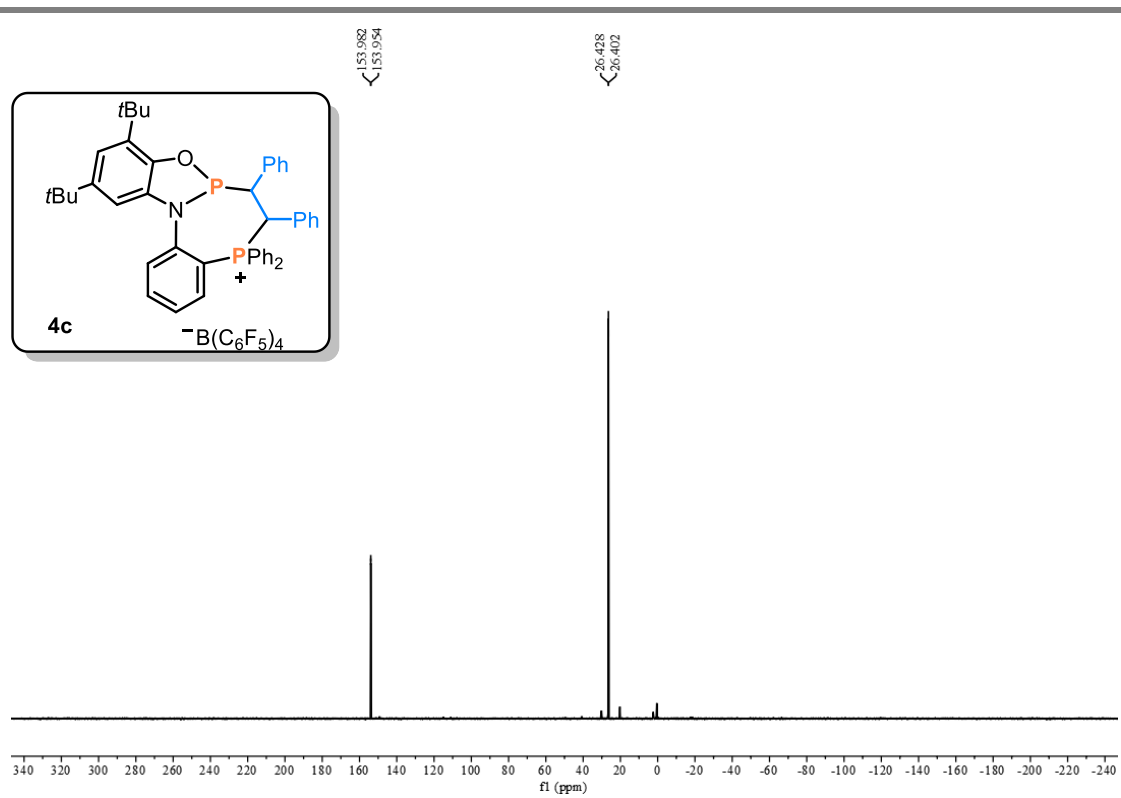

Figure S49:  $^{31}\text{P}\{^1\text{H}\}$  NMR of **4c** (162 MHz,  $\text{CD}_2\text{Cl}_2$ ).

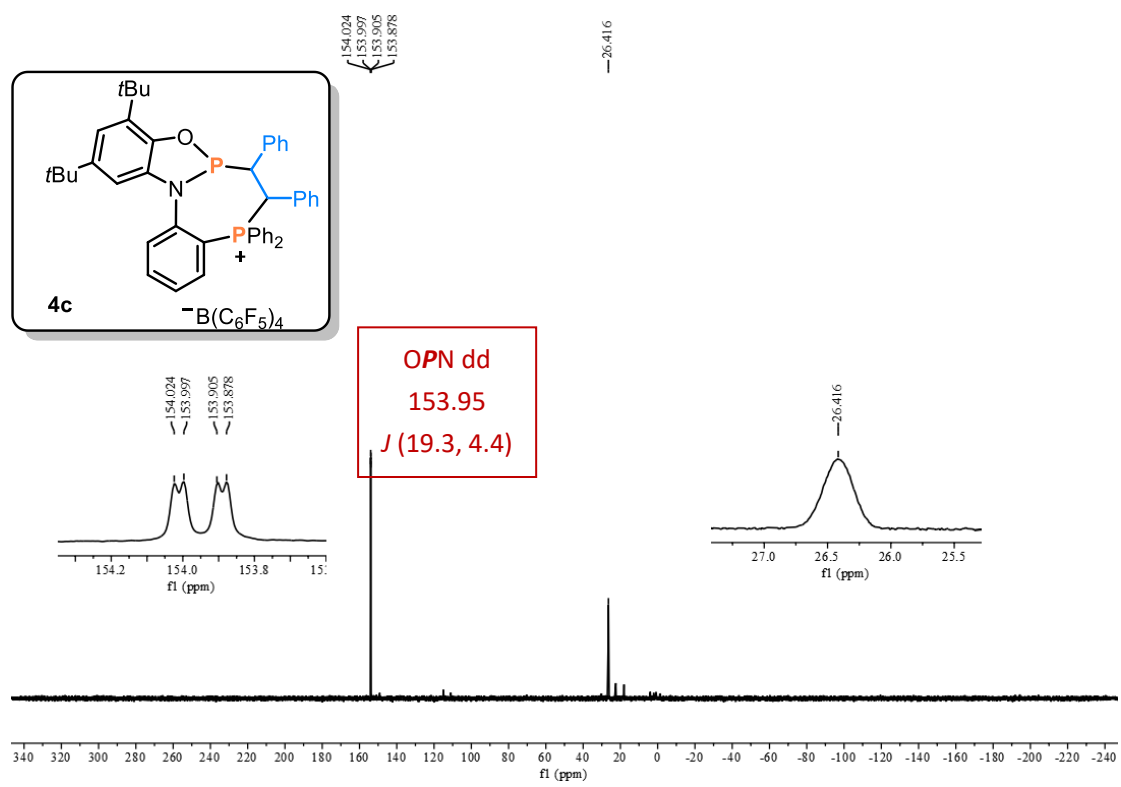

Figure S50:  $^{31}\text{P}$  NMR of **4c** (162 MHz,  $\text{CD}_2\text{Cl}_2$ ).

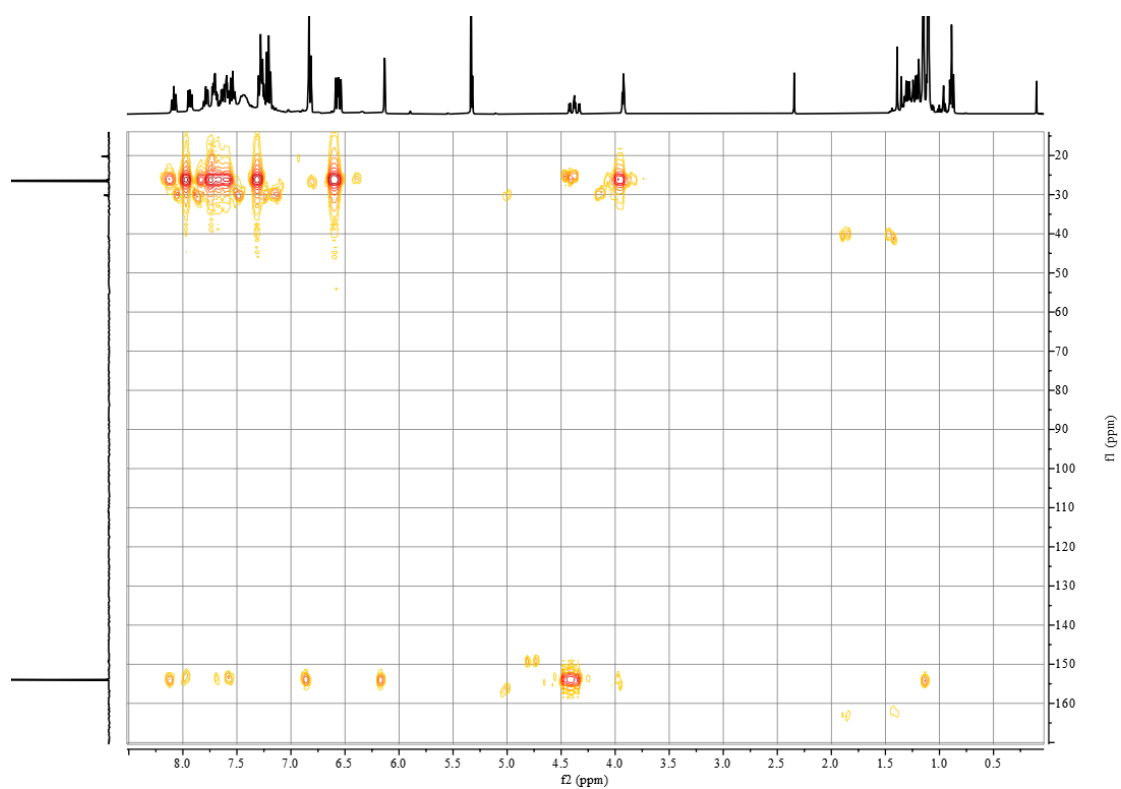

Figure S51:  $^1\text{H}$ - $^{31}\text{P}$  HMBC NMR of **4c** (162 MHz,  $\text{CD}_2\text{Cl}_2$ ).

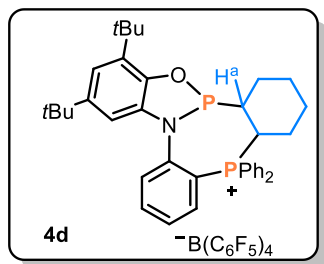

**2a** (100 mg, 84  $\mu\text{mol}$ , 1.0 equiv) was dissolved in 2 mL  $\text{CH}_2\text{Cl}_2$ , followed by the addition of cyclohexene (8.3 mg, 101  $\mu\text{mol}$ , 1.2 equiv). The mixture was stirred at room temperature for 18 h. The solvent was then removed under reduced pressure and the solid was washed with pentane and dried *in vacuo* to give product

**4d** as a yellow solid (90.7 mg, 85% yield).

$^1\text{H NMR}$  (400 MHz,  $\text{CD}_2\text{Cl}_2$ ):  $\delta$  7.98 – 7.89 (m, 1H), 7.86 – 7.78 (m, 1H), 7.78 – 7.63 (m, 5H), 7.57 (tdd,  $J = 7.6, 3.3, 1.7$  Hz, 3H), 7.42 – 7.35 (m, 2H), 7.23 – 7.07 (m, 2H), 6.86 (d,  $J = 2.0$  Hz, 1H), 6.03 (d,  $J = 1.9$  Hz, 1H), 3.17 (dtt,  $J = 19.4, 12.9, 3.4$  Hz, 1H, ONPCH<sup>a</sup>), 2.67 – 2.43 (m, 2H), 2.41 – 2.18 (m, 3H), 2.17 – 2.06 (m, 1H), 1.94 – 1.72 (m, 2H), 1.56 – 1.47 (m, 1H), 1.38 (s, 9H), 1.09 (s, 9H).

$^{11}\text{B NMR}$  (128 MHz,  $\text{CD}_2\text{Cl}_2$ ):  $\delta$  -16.7.

$^{13}\text{C}\{^1\text{H}\}$  NMR (101 MHz,  $\text{CD}_2\text{Cl}_2$ ):  $\delta$  149.9 – 149.5 (m, BArF<sub>20</sub>), 147.5 – 147.2 (m, BArF<sub>20</sub>), 147.0 (dd,  $J = 18.7, 6.3$  Hz, 1C), 146.5 (d,  $J = 12.0$  Hz, 1C), 146.3 (s, 1C), 140.0 – 139.6 (m, BArF<sub>20</sub>), 138.4 (d,  $J = 7.9$  Hz, 1C), 138.2 (d,  $J = 2.5$  Hz, 1C), 138.0 – 137.7 (m, BArF<sub>20</sub>), 137.6 – 137.2 (m, BArF<sub>20</sub>), 136.7 (s, 1C), 135.5 (dd,  $J = 8.2, 2.9$  Hz, 1C), 135.5 – 135.2 (m, BArF<sub>20</sub>), 134.8 (d,  $J = 9.0$  Hz, 2C), 133.5 (d,  $J = 2.2$  Hz, 1C), 132.7 (d,  $J = 9.1$  Hz, 2C), 131.2 (d,  $J = 12.3$  Hz, 2C), 130.6 (d,  $J = 12.0$  Hz, 2C), 128.6 (dd,  $J = 7.7, 2.2$  Hz, 1C), 128.3 (d,  $J = 12.0$  Hz, 1C), 118.4 (s, 1C), 118.2 (d,  $J = 6.7$  Hz, 1C), 118.1 (s, 1C), 117.4 (d,  $J = 17.1$  Hz, 1C), 117.3 (d,  $J = 4.5$  Hz, 1C), 107.3 (s, 1C), 42.6 (dd,  $J = 37.4, 3.1$  Hz, 1C), 36.6 (dd,  $J = 44.6, 16.0$  Hz, 1C), 34.9 (s, 1C), 34.8 (s, 1C), 31.6 (s, 3C), 29.7 (s, 3C), 27.7 (d,  $J = 13.5$  Hz, 1C), 26.0 (dd,  $J = 12.7, 10.1$  Hz, 1C), 22.2 (dd,  $J = 11.8, 3.4$  Hz, 1C), 21.7 (dd,  $J = 6.8, 1.7$  Hz, 1C).

$^{19}\text{F NMR}$  (376 MHz,  $\text{CD}_2\text{Cl}_2$ ):  $\delta$  -132.9 – -133.2 (m), -163.6 (t,  $J = 20.4$  Hz), -167.5 (t,  $J = 19.3$  Hz).

$^{31}\text{P}\{^1\text{H}\}$  NMR (162 MHz,  $\text{CD}_2\text{Cl}_2$ ):  $\delta$  163.9 (d,  $J = 4.3$  Hz, OPN), 28.2 (d,  $J = 4.2$  Hz, PPh<sub>2</sub>).

HRMS (ESI):  $[\text{C}_{38}\text{H}_{44}\text{NOP}_2]^+$ , calculated: 592.2893, found: 592.2894.

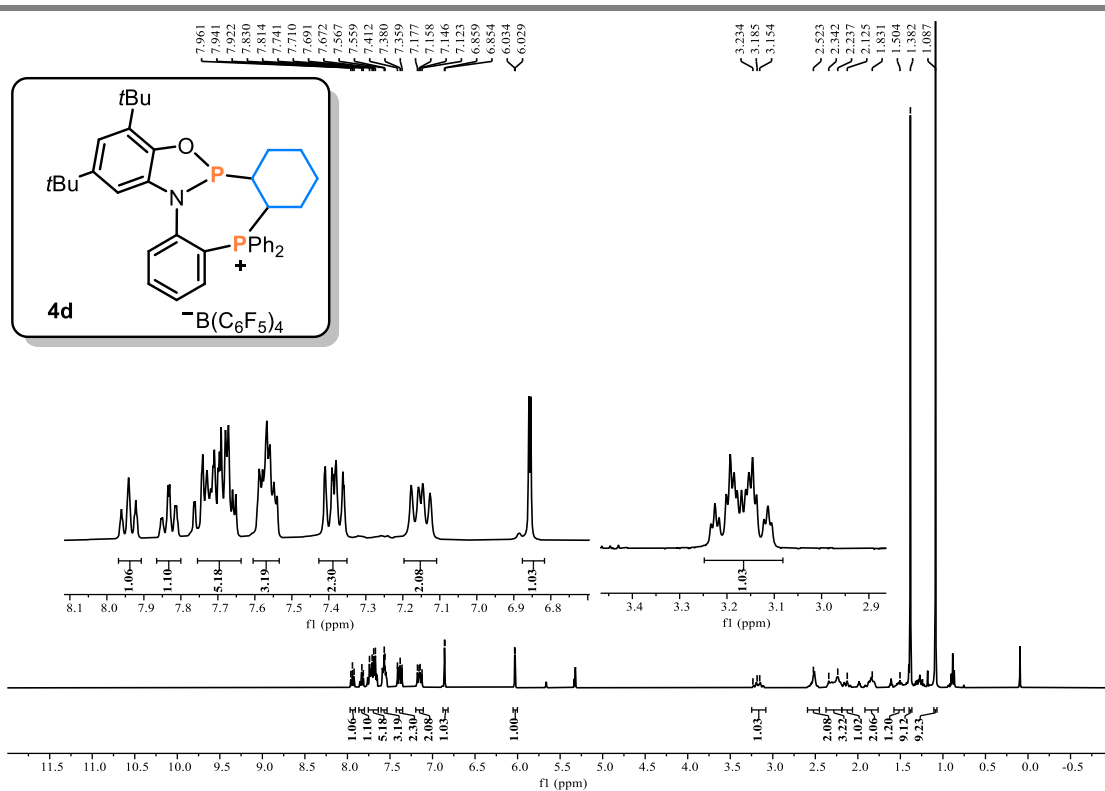

Figure S52:  $^1H$  NMR of **4d** (400 MHz,  $CD_2Cl_2$ ).

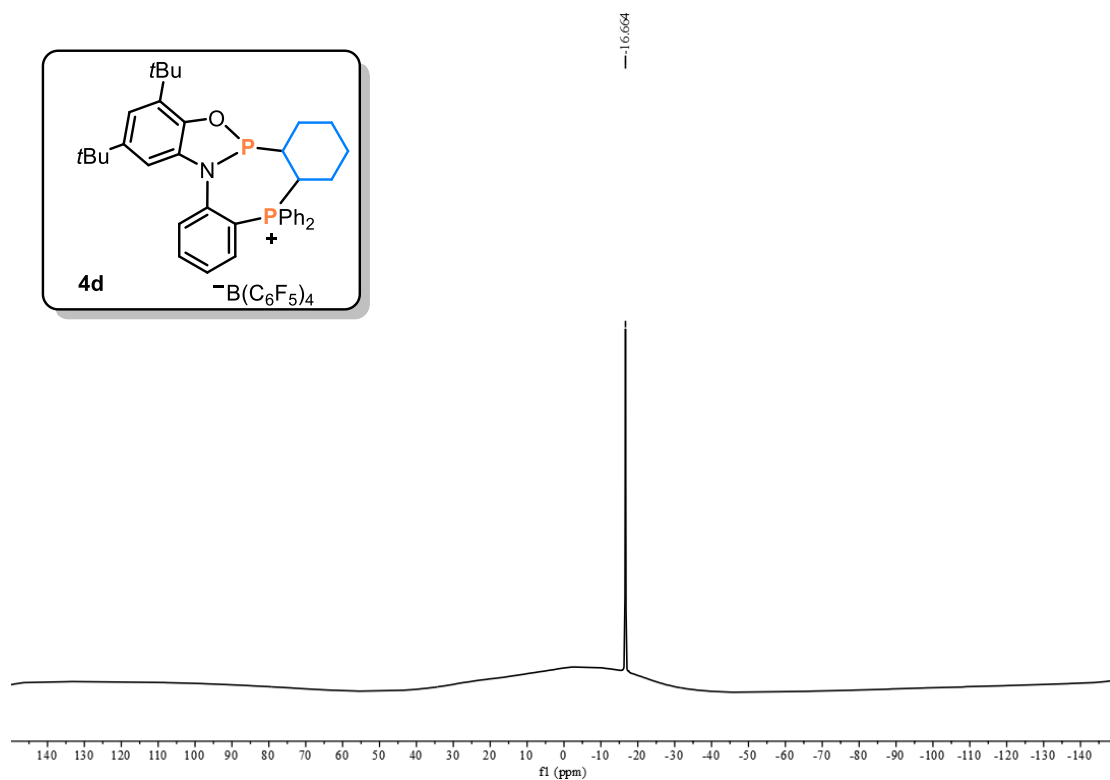

Figure S53:  $^{11}B$  NMR of **4d** (128 MHz,  $CD_2Cl_2$ ).

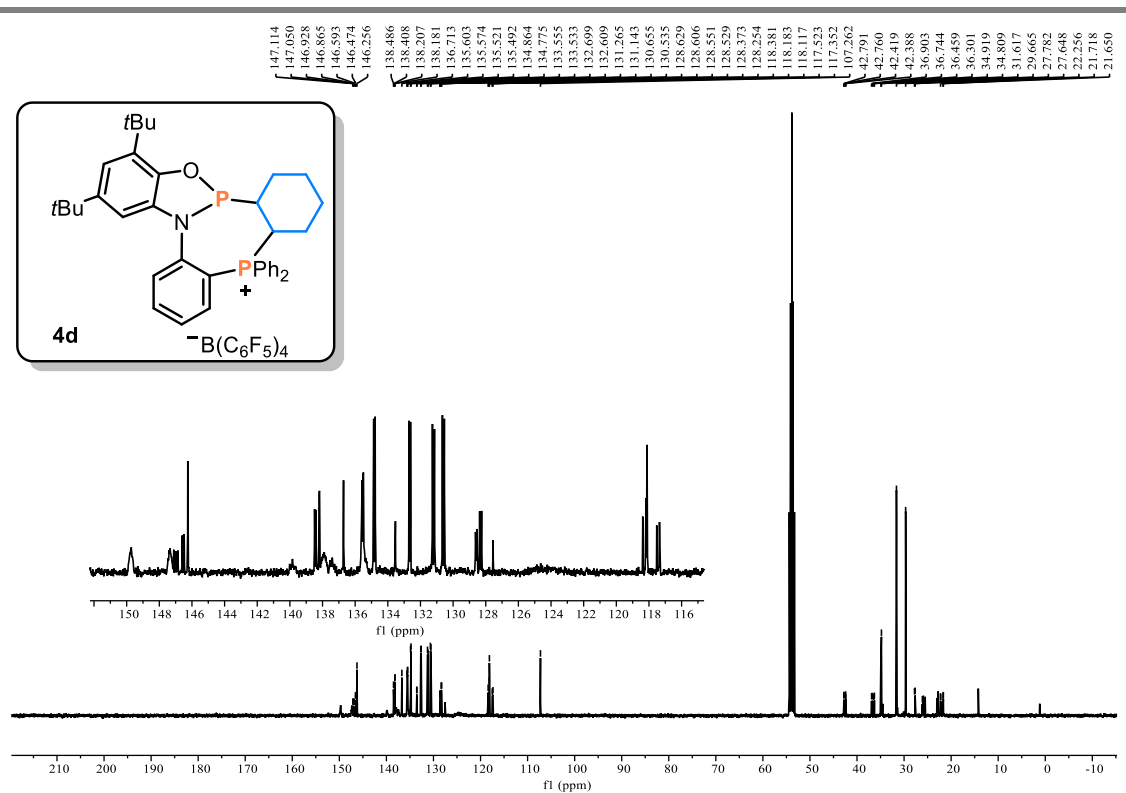

Figure S54:  $^{13}\text{C}\{^1\text{H}\}$  NMR of **4d** (101 MHz,  $\text{CD}_2\text{Cl}_2$ ).

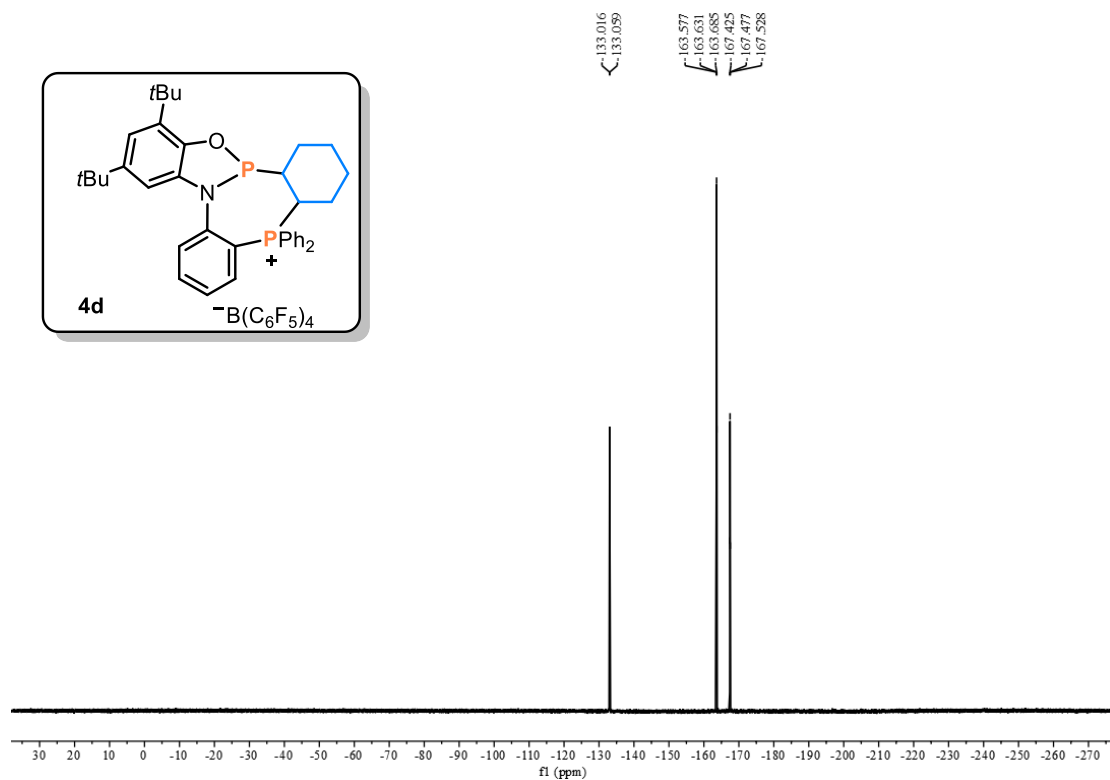

Figure S55:  $^{19}\text{F}$  NMR of **4d** (376 MHz,  $\text{CD}_2\text{Cl}_2$ ).

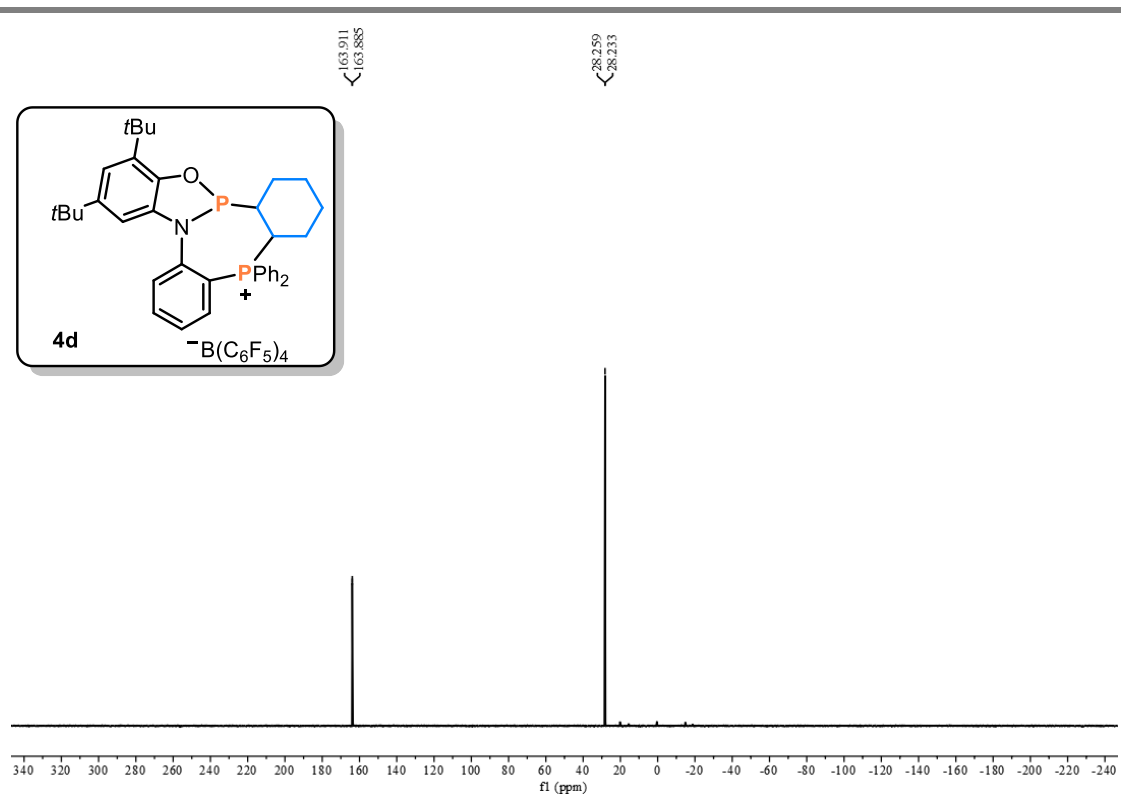

Figure S56:  $^{31}P\{^1H\}$  NMR of **4d** (162 MHz,  $CD_2Cl_2$ ).

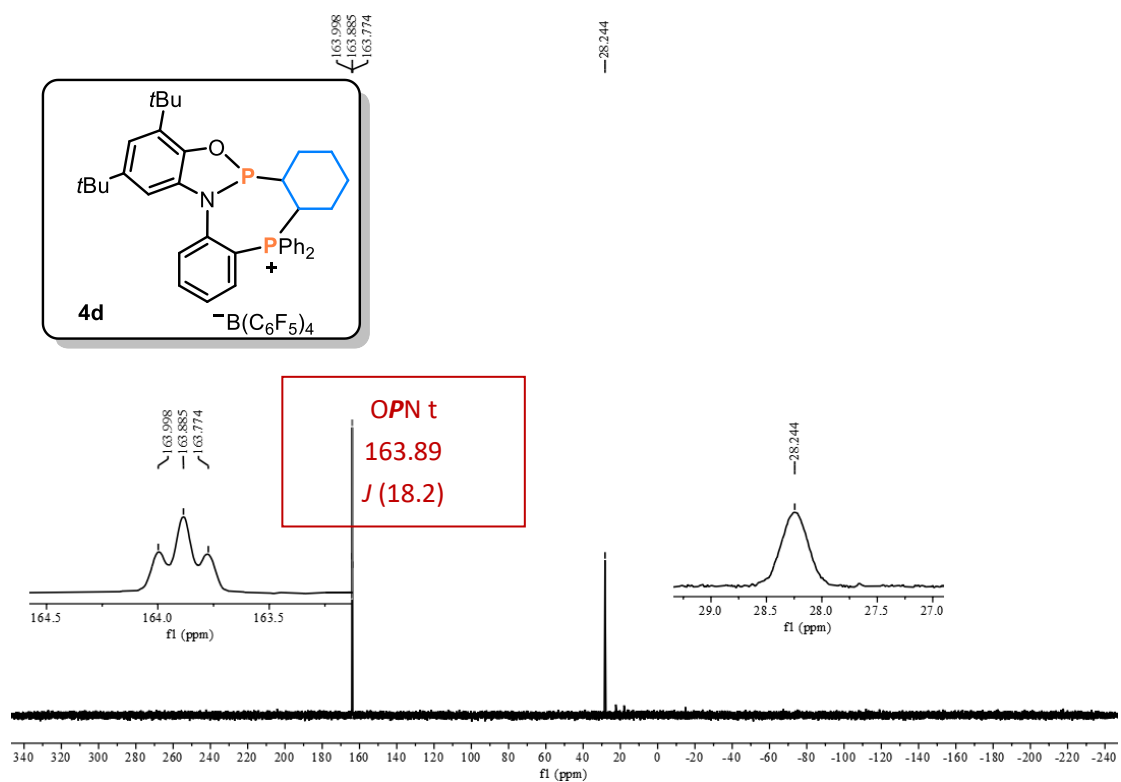

Figure S57:  $^{31}P$  NMR of **4d** (162 MHz,  $CD_2Cl_2$ ).

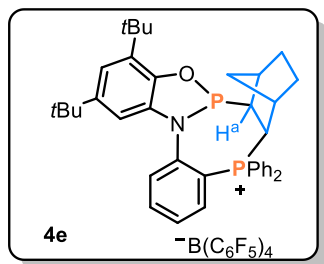

**2a** (100 mg, 84  $\mu\text{mol}$ , 1.0 equiv) was dissolved in 2 mL  $\text{CH}_2\text{Cl}_2$ , followed by the addition of 2-norbornene (15.8 mg, 168  $\mu\text{mol}$ , 2.0 equiv). The mixture was stirred at room temperature for 18 h. The solvent was then removed under reduced pressure and the solid was washed with pentane and dried *in vacuo* to give product

**4e** as an off-white solid (60.6 mg, 56% yield).

**$^1\text{H}$  NMR** (600 MHz,  $\text{CD}_2\text{Cl}_2$ ):  $\delta$  7.90 – 7.81 (m, 3H), 7.79 – 7.64 (m, 9H), 7.31 – 7.25 (m, 1H), 7.17 (dddd,  $J = 8.2, 7.2, 2.3, 1.1$  Hz, 1H), 7.10 (d,  $J = 2.0$  Hz, 1H), 6.97 (ddd,  $J = 14.9, 8.3, 1.5$  Hz, 1H), 3.20 (q,  $J = 9.9$  Hz, 1H, ONPC $H^a$ ), 2.90 – 2.67 (m, 2H), 2.47 (d,  $J = 5.1$  Hz, 1H), 1.79 (dtd,  $J = 13.8, 9.0, 4.4$  Hz, 1H), 1.69 (dq,  $J = 11.5, 3.9$  Hz, 1H), 1.40 (s, 9H), 1.35 – 1.30 (m, 11H), 1.25 (d,  $J = 11.9$  Hz, 2H).

**$^{11}\text{B}$  NMR** (193 MHz,  $\text{CD}_2\text{Cl}_2$ ):  $\delta$  -16.7.

**$^{13}\text{C}\{^1\text{H}\}$  NMR** (151 MHz,  $\text{CD}_2\text{Cl}_2$ ):  $\delta$  149.5 – 149.2 (m, BArF $_{20}$ ), 147.9 – 147.6 (m, BArF $_{20}$ ), 146.9 (dd,  $J = 12.6, 6.8$  Hz, 1C), 146.9 (s, 1C), 146.3 (d,  $J = 11.0$  Hz, 1C), 139.6 – 139.3 (m, BArF $_{20}$ ), 137.9 (s, 1C), 137.9 – 137.7 (m, BArF $_{20}$ ), 137.7 – 137.4 (m, BArF $_{20}$ ), 137.0 (d,  $J = 8.0$  Hz, 1C), 136.7 (dd,  $J = 10.2, 5.1$  Hz, 1C), 136.1 (d,  $J = 2.5$  Hz, 1C), 136.0 – 135.7 (m, BArF $_{20}$ ), 135.7 (d,  $J = 3.3$  Hz, 1C), 135.4 (d,  $J = 2.9$  Hz, 1C), 133.3 (d,  $J = 8.8$  Hz, 2C), 131.3 (s, 1C), 131.1 (d,  $J = 12.2$  Hz, 2C), 130.2 (d,  $J = 12.7$  Hz, 2C), 125.9 (d,  $J = 11.7$  Hz, 1C), 124.0 (d,  $J = 2.8$  Hz, 1C), 123.4 (d,  $J = 2.8$  Hz, 1C), 123.2 (dd,  $J = 9.2, 2.8$  Hz, 1C), 121.7 (d,  $J = 4.9$  Hz, 1C), 121.2 (d,  $J = 5.1$  Hz, 1C), 118.8 (s, 1C), 109.6 (s, 1C), 42.8 (dd,  $J = 37.0, 13.5$  Hz, 1C), 41.7 (s, 1C), 37.0 (d,  $J = 1.0$  Hz, 1C), 36.4 (dd,  $J = 12.3, 1.6$  Hz, 1C), 35.4 (s, 1C), 35.0 (s, 1C), 34.5 (s, 1C), 32.0 (d,  $J = 14.2$  Hz, 1C), 31.7 (s, 3C), 30.8 (d,  $J = 4.8$  Hz, 1C), 29.6 (s, 3C).

**$^{19}\text{F}$  NMR** (565 MHz,  $\text{CD}_2\text{Cl}_2$ ):  $\delta$  -133.0 – -133.2 (m), -163.7 (t,  $J = 20.5$  Hz), -167.6 (t,  $J = 19.3$  Hz).

**$^{31}\text{P}\{^1\text{H}\}$  NMR** (243 MHz,  $\text{CD}_2\text{Cl}_2$ ):  $\delta$  127.9 (d,  $J = 43.7$  Hz, OPN), 31.1 (d,  $J = 43.5$  Hz, PPh $_2$ ).

**HRMS** (ESI):  $[\text{C}_{39}\text{H}_{44}\text{ClNOP}_2]^+$ , calculated: 604.2893, found: 604.2895.



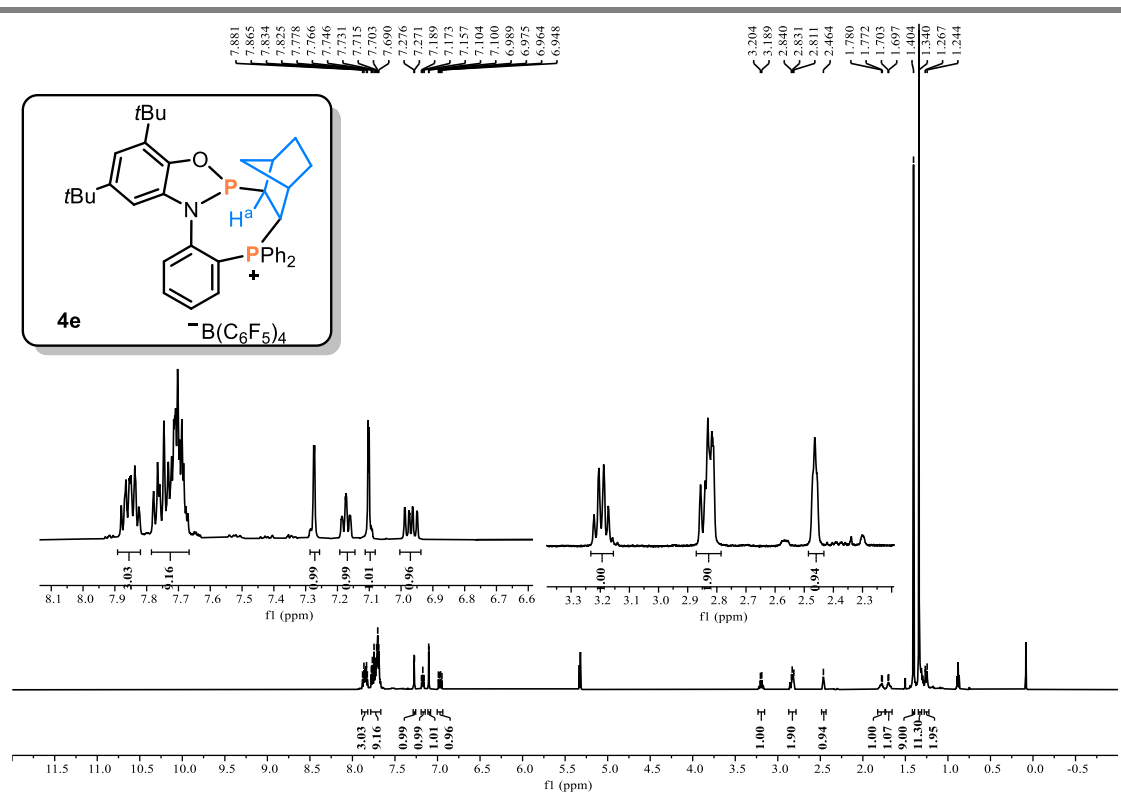

Figure S58: <sup>1</sup>H NMR of 4e (600 MHz, CD<sub>2</sub>Cl<sub>2</sub>).

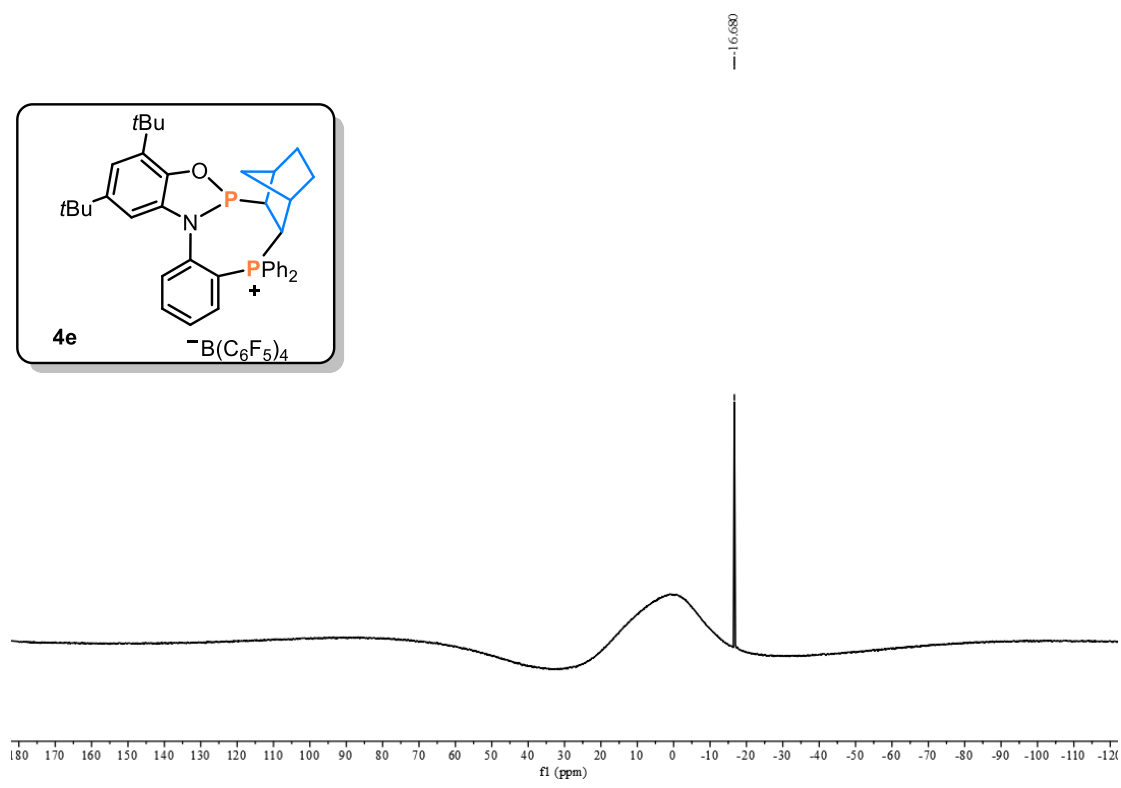

Figure S59: <sup>11</sup>B NMR of 4e (193 MHz, CD<sub>2</sub>Cl<sub>2</sub>).

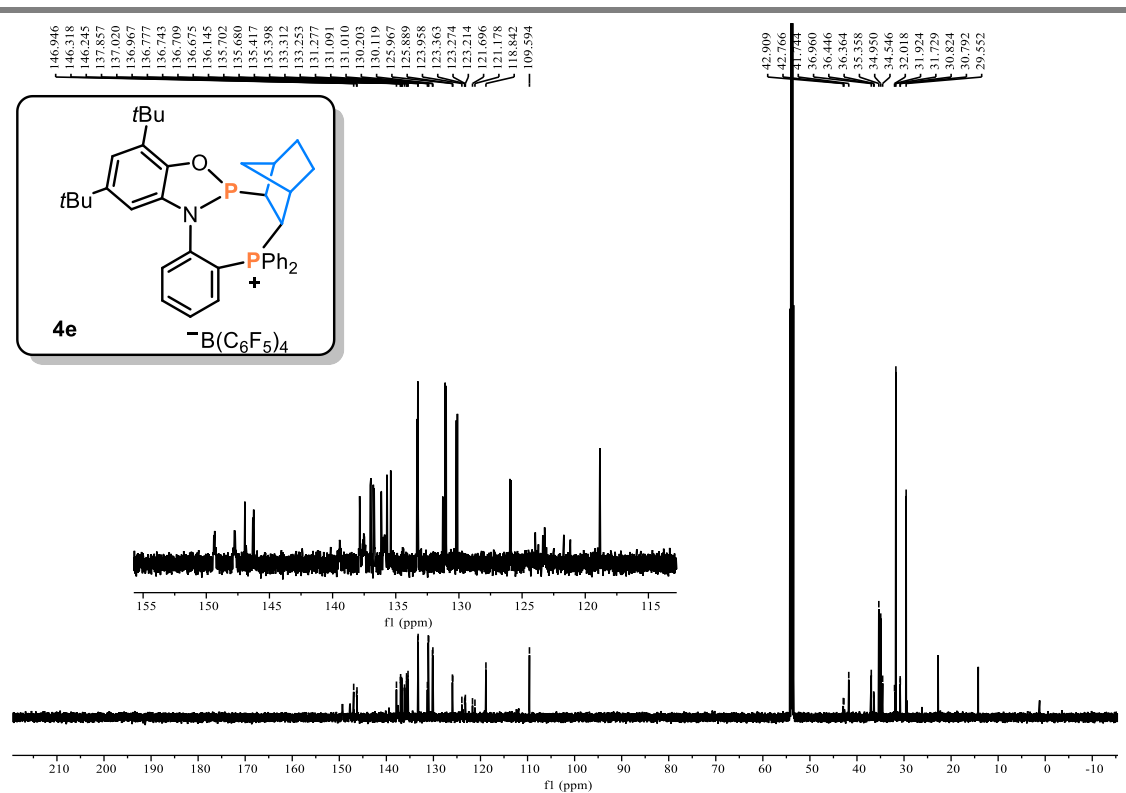

Figure S60:  $^{13}\text{C}\{^1\text{H}\}$  NMR of **4e** (151 MHz,  $\text{CD}_2\text{Cl}_2$ ).

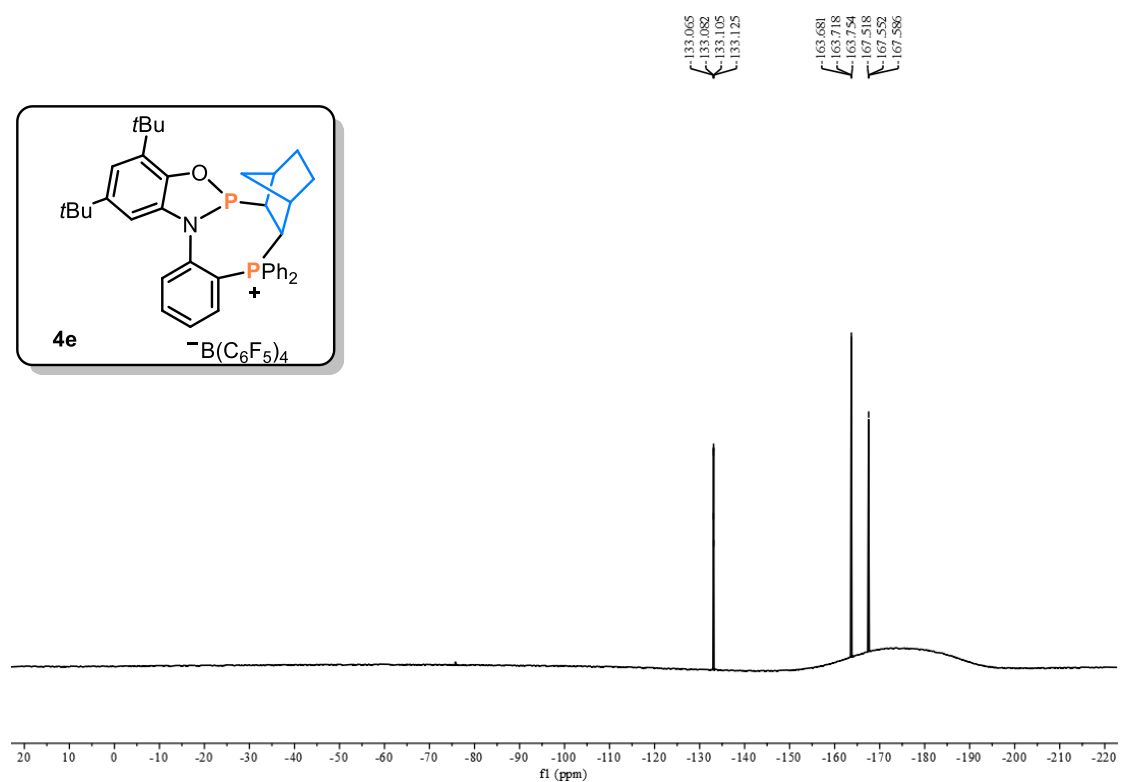

Figure S61:  $^{19}\text{F}$  NMR of **4e** (565 MHz,  $\text{CD}_2\text{Cl}_2$ ).

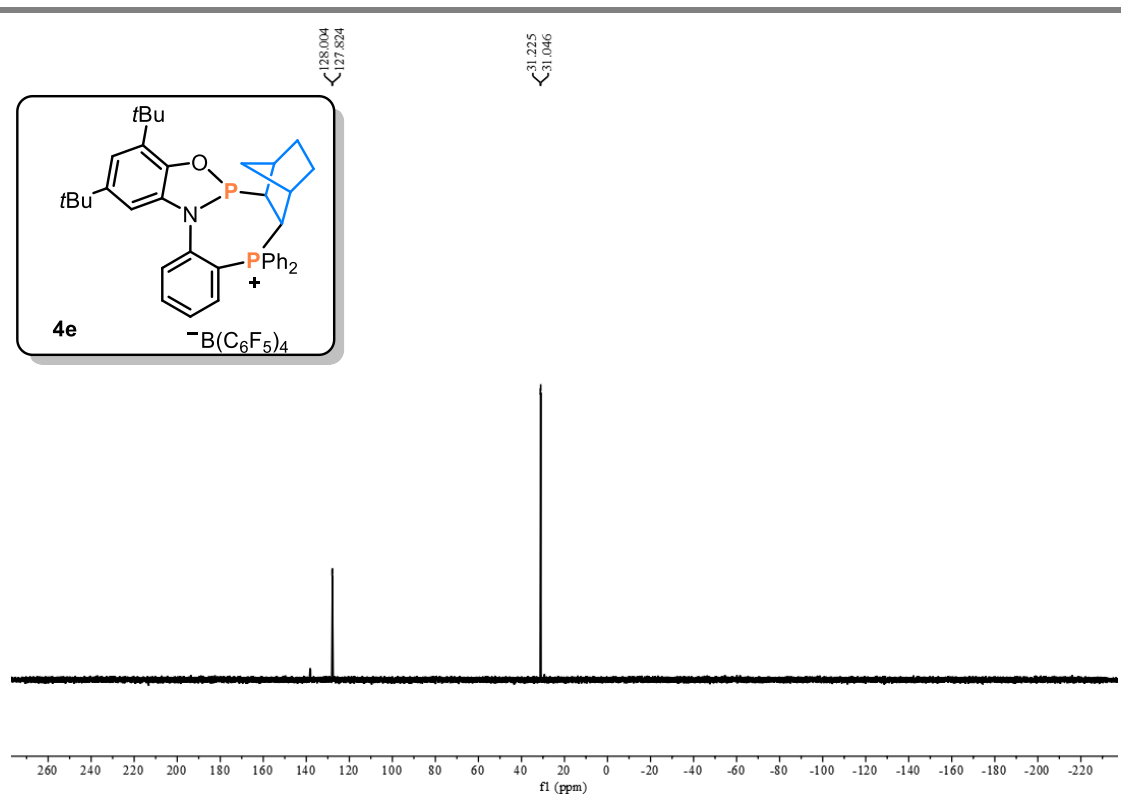

Figure S62:  $^{31}\text{P}\{^1\text{H}\}$  NMR of **4e** (243 MHz,  $\text{CD}_2\text{Cl}_2$ ).

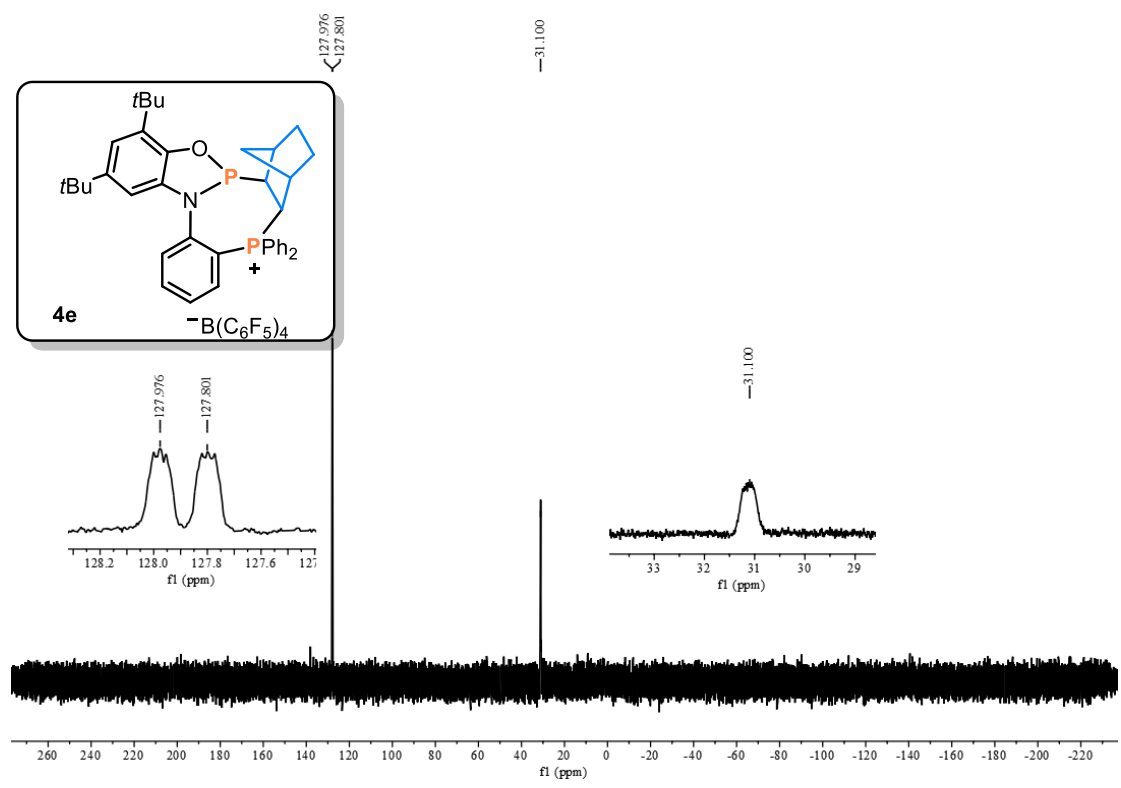

Figure S63:  $^{31}\text{P}$  NMR of **4e** (243 MHz,  $\text{CD}_2\text{Cl}_2$ ).

## 5. Phosphinophosphination of Benzaldehyde

### 5.1 Reaction development

The yellow phosphonium salt **2a** (15 mg, 12.6  $\mu\text{mol}$ , 1.0 equiv) and benzaldehyde (2.0 mg, 18.9  $\mu\text{mol}$ , 1.5 equiv) were weighed into a J. Young type NMR tube. A colorless solution was obtained after adding  $\text{CD}_2\text{Cl}_2$  (0.5 mL), indicating full conversion of the starting material. Two diastereomeric addition products were formed after 5 hours as suggested by the multinuclear NMR data. The major one has two doublets at 126.0 and 30.3 ppm ( $^3J_{\text{PP}} = 5.3$  Hz) while the minor one has two singlets at 116.4 and 29.3 ppm (Figure S64). The  $^1\text{H}$  NMR spectrum showed resonances at 6.53 ppm (t,  $J = 4.2$  Hz) for major diastereomer and 5.77 ppm (d,  $J = 9.9$  Hz) for minor diastereomer (Figure S65).

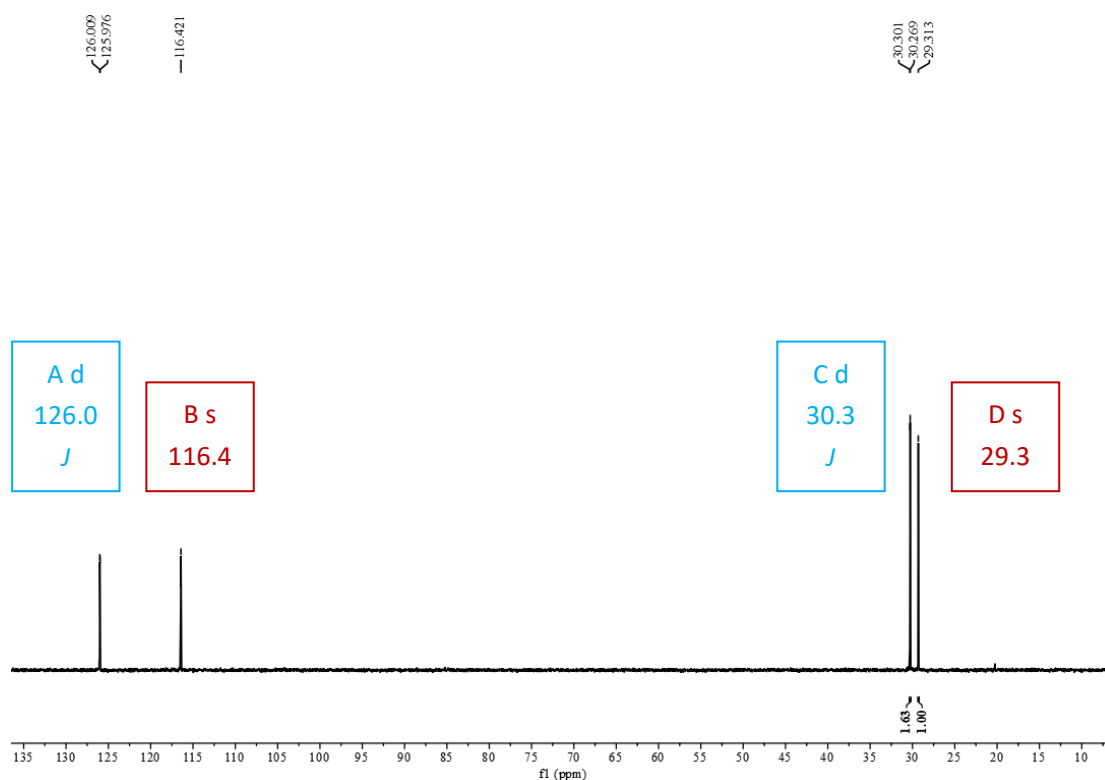

**Figure S64:**  $^{31}\text{P}\{^1\text{H}\}$  NMR (400 MHz) spectra of  $[\text{PNOP}][\text{B}(\text{C}_6\text{F}_5)_4]$  with benzaldehyde in  $\text{CD}_2\text{Cl}_2$  at room temperature after 5 h.

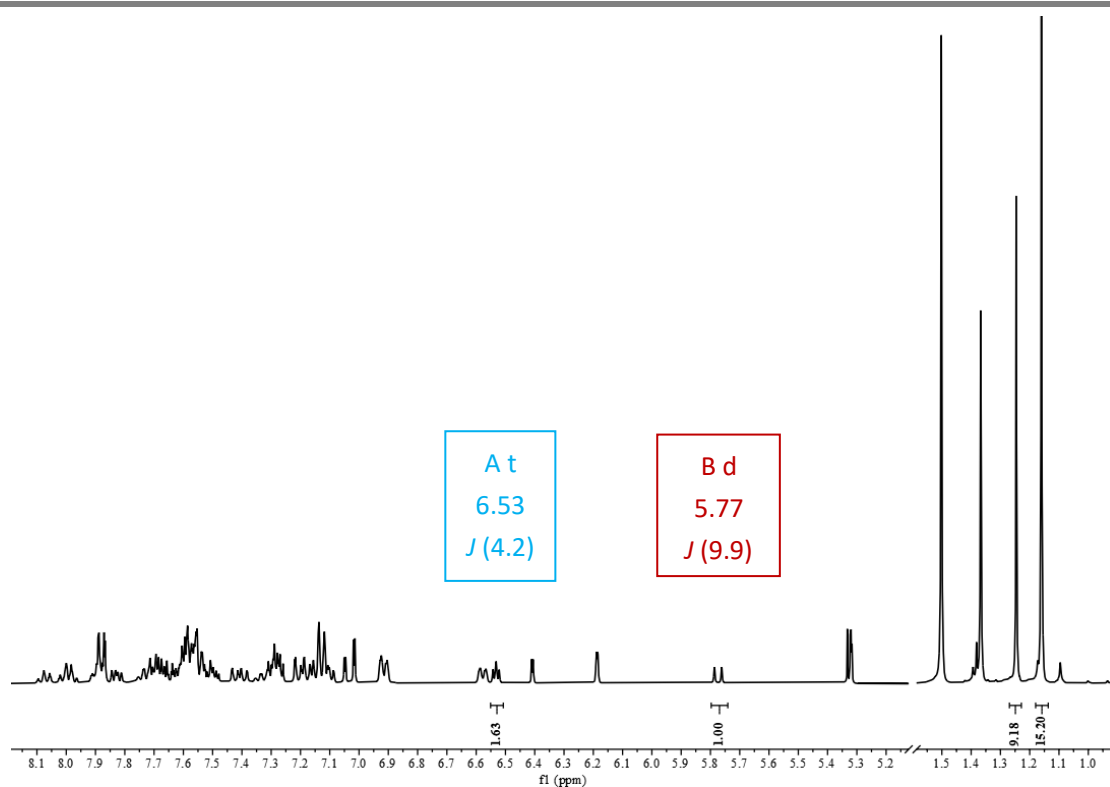

**Figure S65:**  $^1\text{H}$  NMR (400 MHz) spectra of  $[\text{PNOP}][\text{B}(\text{C}_6\text{F}_5)_4]$  with benzaldehyde in  $\text{CD}_2\text{Cl}_2$  at room temperature after 5 h.

The solution was probed by  $^1\text{H}$  and  $^{31}\text{P}\{^1\text{H}\}$  NMR over time. The combined, multinuclear spectral data indicated the conversion from one diastereomer to the other one (Scheme S3 and Figure S66-S68). Only the diastereomer with two singlets at 116.4 and 29.3 ppm was observed finally.

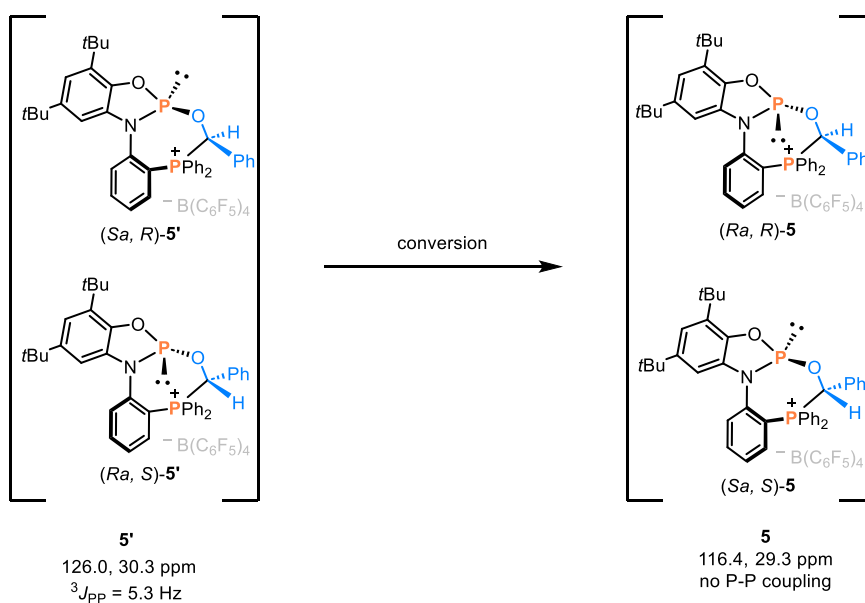

**Scheme S3:** The conversion from one racemate **5'** to the more stable racemate **5**.

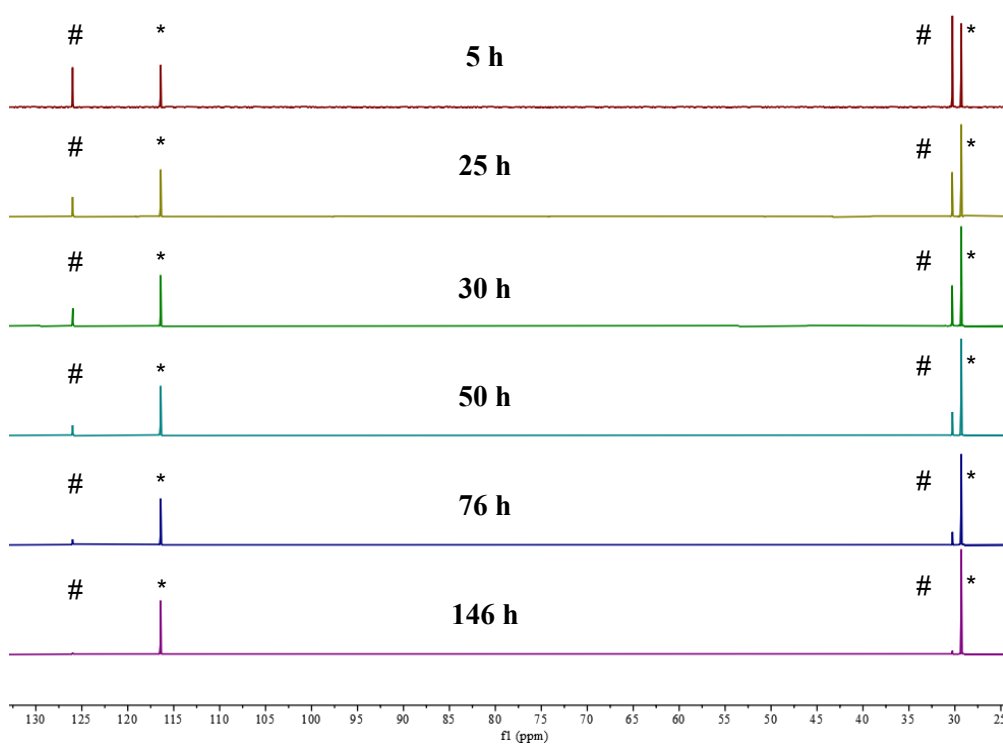

**Figure S66:** Stacked  $^{31}\text{P}\{^1\text{H}\}$  NMR (162 MHz) spectra of **2a** with benzaldehyde in  $\text{CD}_2\text{Cl}_2$  over time. # denotes signals of **5'**, \* denotes signals of more stable product **5**.

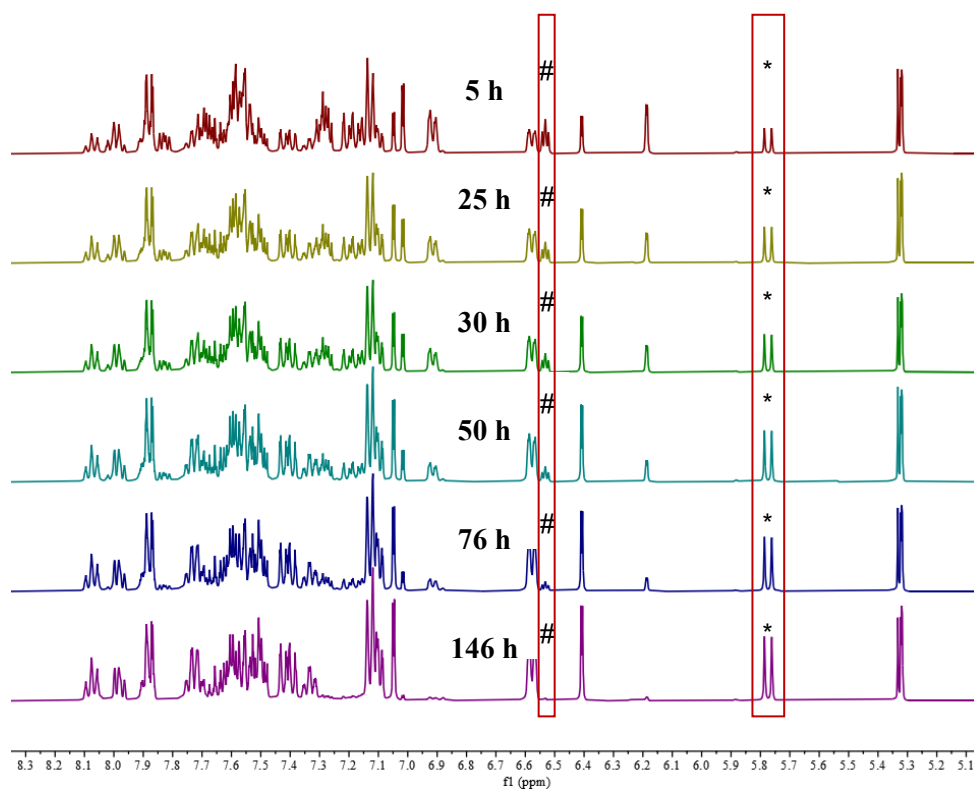

**Figure S67:** Stacked  $^1\text{H}$  NMR (400 MHz) spectra of **2a** with benzaldehyde in  $\text{CD}_2\text{Cl}_2$  at over time. # denotes protons of **5'**, \* denotes protons of more stable product **5**.

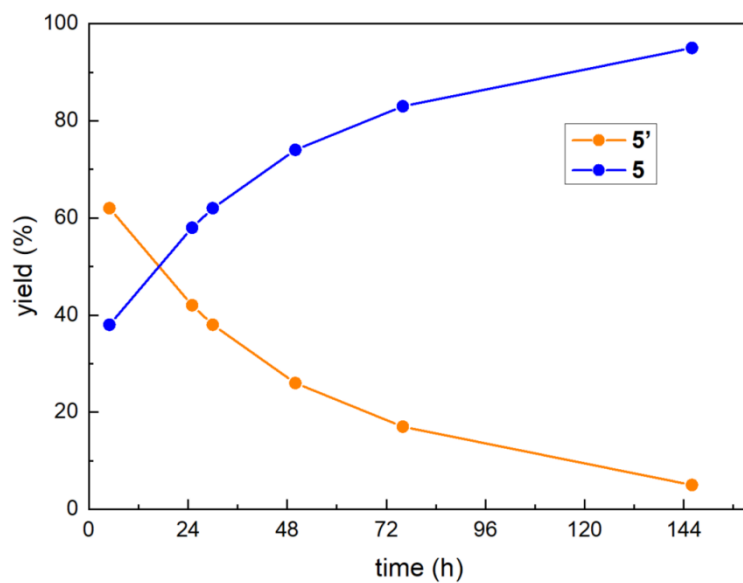

**Figure S68:** The yields of racemates 5' and 5 over time. Yields were calculated based on the integration area of *tert*-butyl group protons from  $^1\text{H}$  NMR spectra.

## 5.2 Preparation of 5

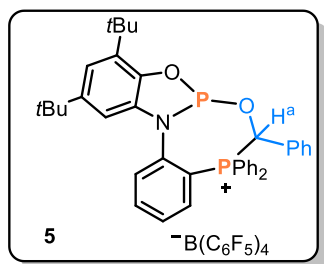

**2a** (100 mg, 84  $\mu\text{mol}$ , 1.0 equiv) was dissolved in  $\text{CH}_2\text{Cl}_2$  (2 mL), followed by the addition of benzaldehyde (10.7 mg, 101  $\mu\text{mol}$ , 1.2 equiv). The mixture was stirred over a week, after which the volatiles were removed under reduced pressure and washed with pentane, then dried *in vacuo* to give the product **5** as a white solid

(106.8 mg, 98% yield). Single crystals suitable for X-ray diffraction were grown by gas phase diffusion of pentane into the  $\text{CH}_2\text{Cl}_2$  solution.

**$^1\text{H}$  NMR** (600 MHz,  $\text{CD}_2\text{Cl}_2$ ):  $\delta$  8.08 (tt,  $J = 7.8, 1.6$  Hz, 1H), 8.02 – 7.95 (m, 1H), 7.89 (tdt,  $J = 7.6, 2.1, 1.2$  Hz, 1H), 7.76 – 7.70 (m, 2H), 7.65 – 7.57 (m, 2H), 7.56 – 7.47 (m, 3H), 7.43 – 7.38 (m, 2H), 7.34 (tdt,  $J = 7.4, 2.4, 1.2$  Hz, 1H), 7.16 – 7.08 (m, 4H), 7.04 (d,  $J = 2.0$  Hz, 1H), 6.62 – 6.52 (m, 2H), 6.40 (d,  $J = 2.0$  Hz, 1H), 5.77 (d,  $J = 9.9$  Hz, 1H,  $\text{OCH}^a\text{Ph}$ ), 1.36 (s, 9H), 1.24 (s, 9H).

**$^{11}\text{B}$  NMR** (128 MHz,  $\text{CD}_2\text{Cl}_2$ ):  $\delta$  -16.7.

**$^{13}\text{C}\{^1\text{H}\}$  NMR** (101 MHz,  $\text{CD}_2\text{Cl}_2$ ):  $\delta$  149.9 – 149.5 (m,  $\text{BArF}_{20}$ ), 148.1 (s, 1C), 147.6 – 147.1 (m,  $\text{BArF}_{20}$ ), 144.8 (d,  $J = 13.7$  Hz, 1C), 140.7 (dd,  $J = 6.7, 5.6$  Hz, 1C), 140.1 – 139.6 (m,  $\text{BArF}_{20}$ ), 138.0 (d,  $J = 2.7$  Hz, 1C), 138.0 – 137.7 (m,  $\text{BArF}_{20}$ ), 137.5 (d,  $J = 8.3$  Hz, 1C), 137.5 – 137.2 (m,  $\text{BArF}_{20}$ ), 136.8 (d,  $J = 3.2$  Hz, 1C), 136.3 (d,  $J = 3.0$  Hz, 1C), 136.1 (d,  $J = 19.9$  Hz, 1C), 135.8 (d,  $J = 9.1$  Hz, 2C), 135.7 – 135.2 (m,  $\text{BArF}_{20}$ ), 134.4 (dd,  $J = 7.8, 3.3$  Hz, 1C), 133.4 (d,  $J = 9.1$  Hz, 2C), 131.5 (dd,  $J = 2.1, 1.8$  Hz, 1C), 131.4 (s, 1C), 131.0 (d,  $J = 12.3$  Hz, 2C), 130.5 (d,  $J = 12.7$  Hz, 2C), 129.3 (d,  $J = 2.9$  Hz, 1C), 128.6 (d,  $J = 5.4$  Hz, 1C), 128.6 (d,  $J = 1.0$  Hz, 1C), 121.1 (dd,  $J = 81.6, 6.3$  Hz, 1C), 117.4 (s, 1C), 116.8 (s, 2C), 116.6 (s, 1C), 114.1 (s, 1C), 113.2 (s, 1C), 104.2 (s, 1C), 73.1 (dd,  $J = 56.9, 5.2$  Hz, 1C), 35.4 (s, 1C), 34.9 (s, 1C), 31.7 (s, 3C), 29.5 (s, 3C).

**$^{19}\text{F}$  NMR** (376 MHz,  $\text{CD}_2\text{Cl}_2$ ):  $\delta$  -133.0 – -133.2 (m), -163.7 (t,  $J = 20.4$  Hz), -167.6 (t,  $J = 19.3$  Hz).

**$^{31}\text{P}\{^1\text{H}\}$  NMR** (243 MHz,  $\text{CD}_2\text{Cl}_2$ ):  $\delta$  116.4 (s,  $\text{OPN}$ ), 29.3 (s,  $\text{PPh}_2$ ).



HRMS (ESI):  $[C_{39}H_{40}NO_2P_2]^+$ , calculated: 616.2529, found: 616.2531.

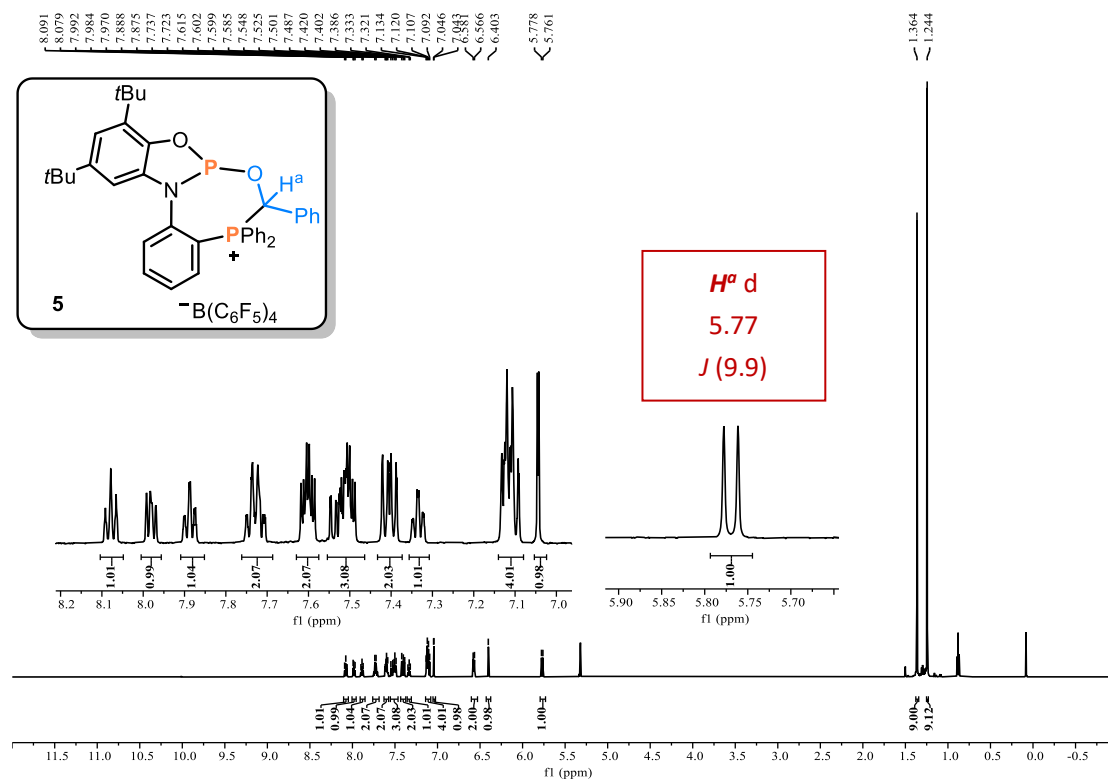

Figure S69:  $^1H$  NMR of 5 (600 MHz,  $CD_2Cl_2$ ).

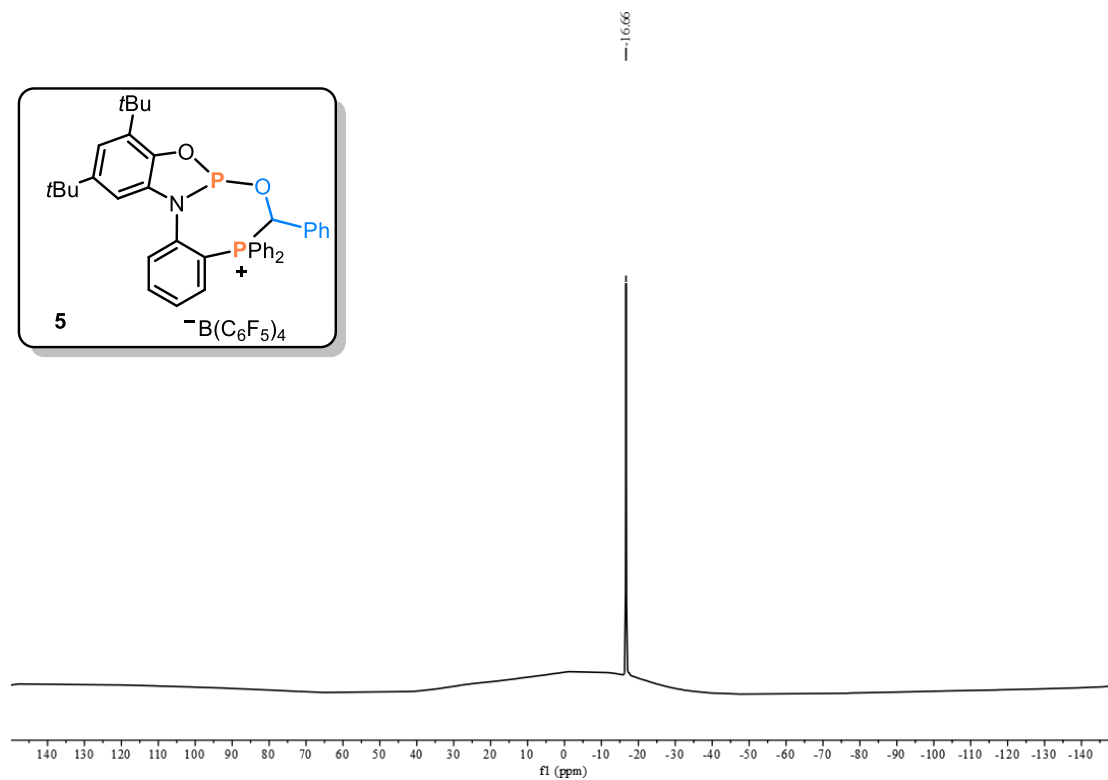

Figure S70:  $^{11}B$  NMR of 5 (128 MHz,  $CD_2Cl_2$ ).

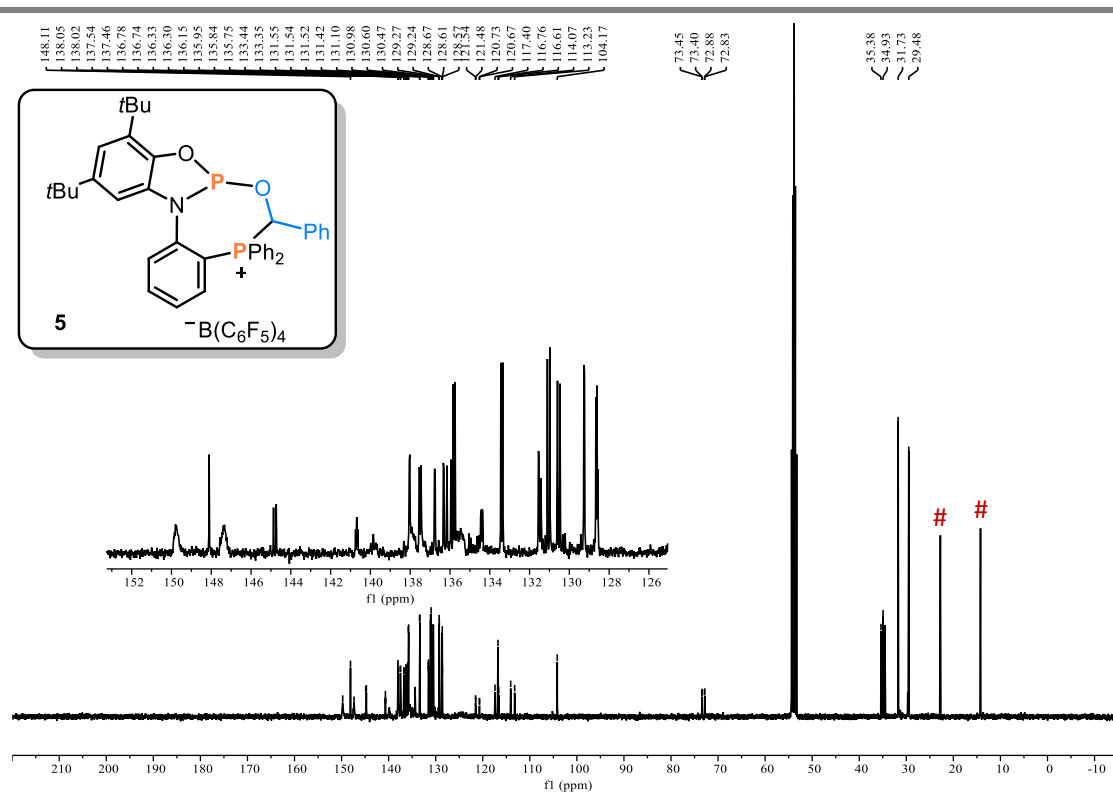

Figure S71:  $^{13}\text{C}\{^1\text{H}\}$  NMR of **5** (101MHz,  $\text{CD}_2\text{Cl}_2$ ). # denotes pentane.

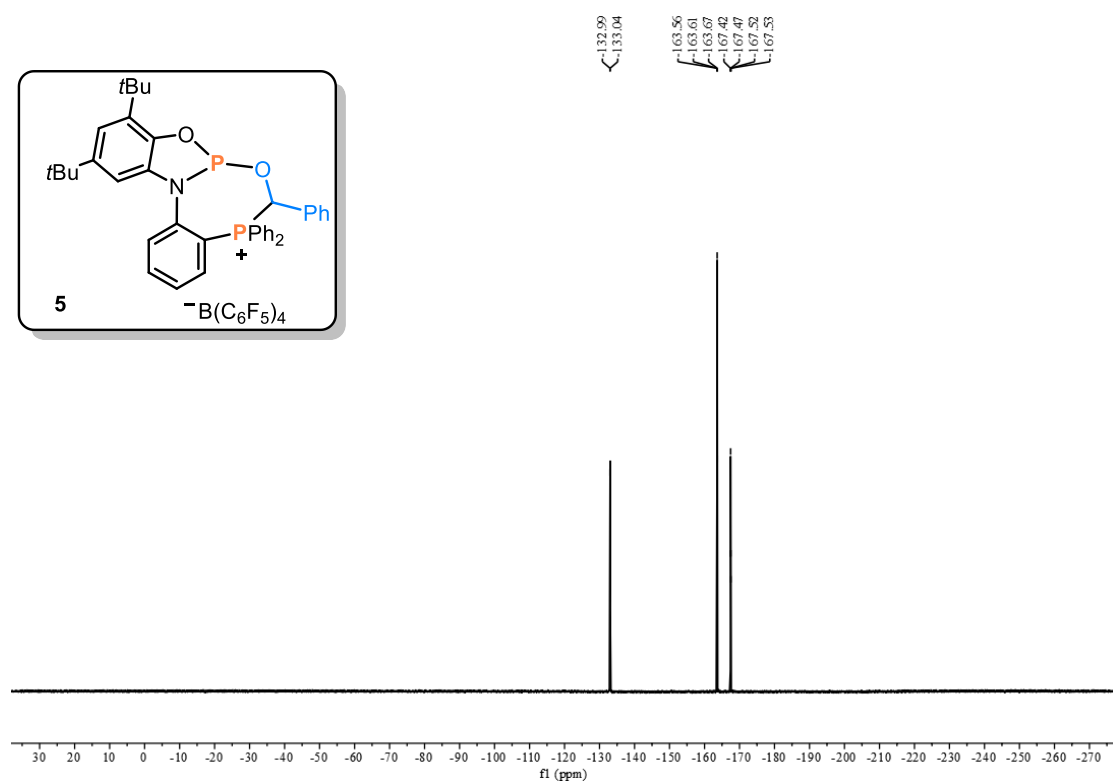

Figure S72:  $^{19}\text{F}$  NMR of **5** (376 MHz,  $\text{CD}_2\text{Cl}_2$ ).

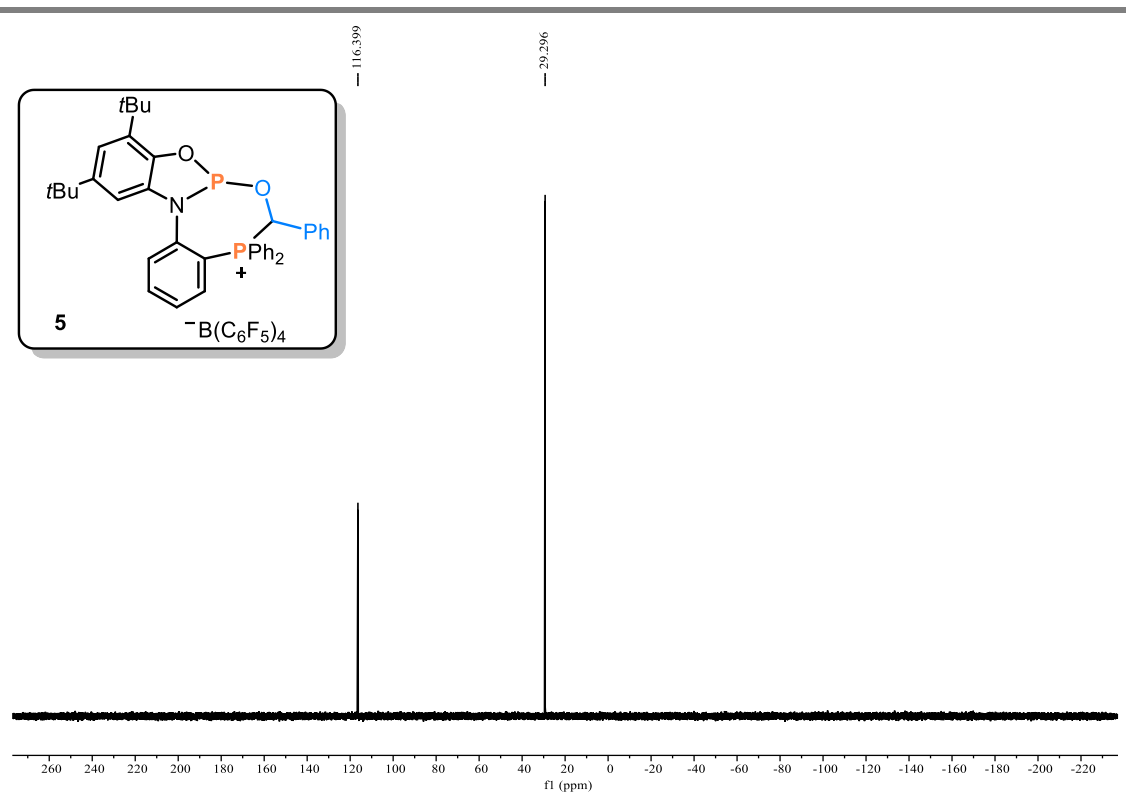

Figure S73:  $^{31}\text{P}\{^1\text{H}\}$  NMR of **5** (243 MHz,  $\text{CD}_2\text{Cl}_2$ ).

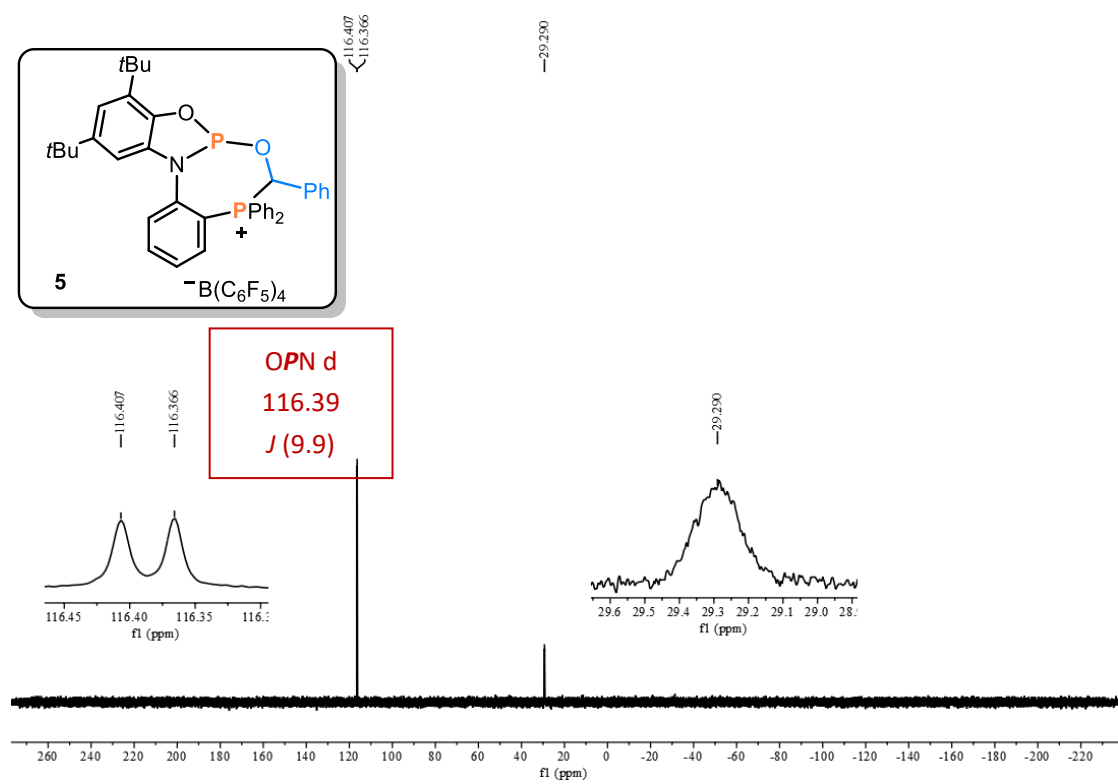

Figure S74:  $^{31}\text{P}$  NMR of **5** (243 MHz,  $\text{CD}_2\text{Cl}_2$ ).

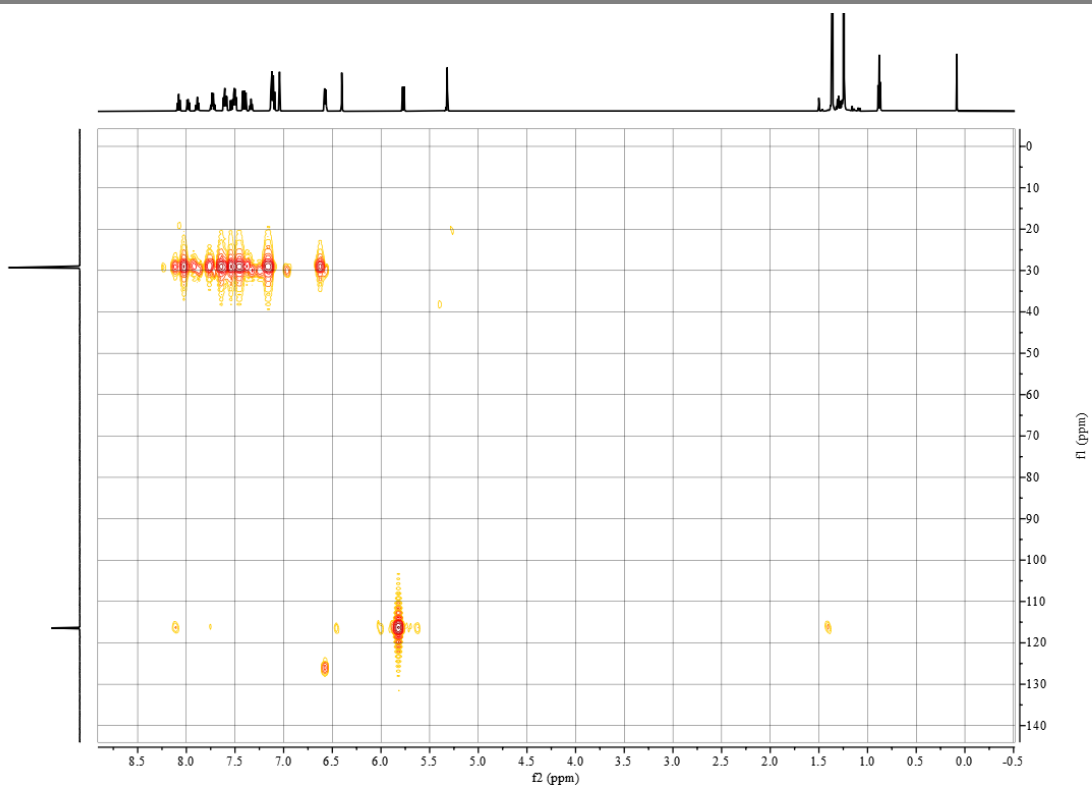

Figure S75:  $^1\text{H}$ - $^{31}\text{P}$  HMBC NMR of **5** (162 MHz,  $\text{CD}_2\text{Cl}_2$ ).

## 6. Phosphinophosphination of Ketones

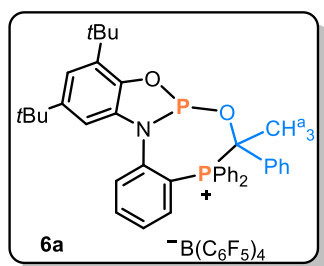

**2a** (100 mg, 84  $\mu\text{mol}$ , 1.0 equiv) was dissolved in  $\text{CH}_2\text{Cl}_2$  (2 mL), followed by the addition of acetophenone (40.4 mg, 336  $\mu\text{mol}$ , 4.0 equiv). The mixture was stirred over a week, after which the volatiles were removed under reduced pressure and washed with pentane, then dried *in vacuo* to give a set of diastereomers of product **6a** in a 4:1 ratio as a white solid (87.5 mg, 79% yield). Single crystals of major diastereomer suitable for X-ray diffraction were grown by gas phase diffusion of pentane into the  $\text{CH}_2\text{Cl}_2$  solution.

**$^1\text{H}$  NMR** (600 MHz,  $\text{CD}_2\text{Cl}_2$ ) *major diastereomer*:  $\delta$  8.09 (ddd,  $J = 12.4, 8.2, 1.4$  Hz, 1H), 8.04 – 7.96 (m, 2H), 7.80 – 7.68 (m, 4H), 7.61 – 7.55 (m, 2H), 7.37 (tt,  $J = 6.2, 1.3$  Hz, 1H), 7.29 – 7.24 (m, 1H), 7.21 (ddd,  $J = 11.9, 8.5, 1.4$  Hz, 2H), 7.14 (t,  $J = 7.7$  Hz, 2H), 7.09 (ddd,  $J = 8.1, 6.8, 3.9$  Hz, 2H), 6.90 (d,  $J = 2.0$  Hz, 1H), 6.81 – 6.75 (m, 2H), 5.65 (d,  $J = 2.0$  Hz, 1H), 2.62 (dd,  $J = 16.4, 3.9$  Hz, 3H,  $\text{OCC}H^a_3\text{Ph}$ ), 1.56 (s, 9H), 1.05 (s, 9H). *minor diastereomer*:  $\delta$  1.81 (d,  $J = 16.1$  Hz, 3H,  $\text{OCC}H^a_3\text{Ph}$ ), 1.41 (s, 9H), 1.32 (s, 9H). The aromatic region protons of minor diastereomer could not be reliably assigned due to low intensity and an overlap of signals.

**$^{11}\text{B}$  NMR** (193 MHz,  $\text{CD}_2\text{Cl}_2$ ):  $\delta$  -16.7.

**$^{13}\text{C}\{^1\text{H}\}$  NMR** (151 MHz,  $\text{CD}_2\text{Cl}_2$ ): The signals could not be reliably assigned due to low intensity and an overlap of signals.

**$^{19}\text{F}$  NMR** (376 MHz,  $\text{CD}_2\text{Cl}_2$ ):  $\delta$  -132.8 – -133.2 (m), -163.5 (t,  $J = 20.4$  Hz), -167.4 (t,  $J = 19.8$  Hz).

**$^{31}\text{P}\{^1\text{H}\}$  NMR** (243 MHz,  $\text{CD}_2\text{Cl}_2$ ):  $\delta$  125.3 (d,  $J = 10.9$  Hz, major product,  $\text{OPN}$ ), 119.4 (d,  $J = 6.5$  Hz, minor product,  $\text{OPN}$ ), 36.9 (d,  $J = 6.3$  Hz, minor product,  $\text{PPh}_2$ ), 34.2 (d,  $J = 10.9$  Hz, major product,  $\text{PPh}_2$ ).

**HRMS** (ESI):  $[\text{C}_{40}\text{H}_{42}\text{NO}_2\text{P}_2]^+$ , calculated: 630.2685, found: 630.2692.



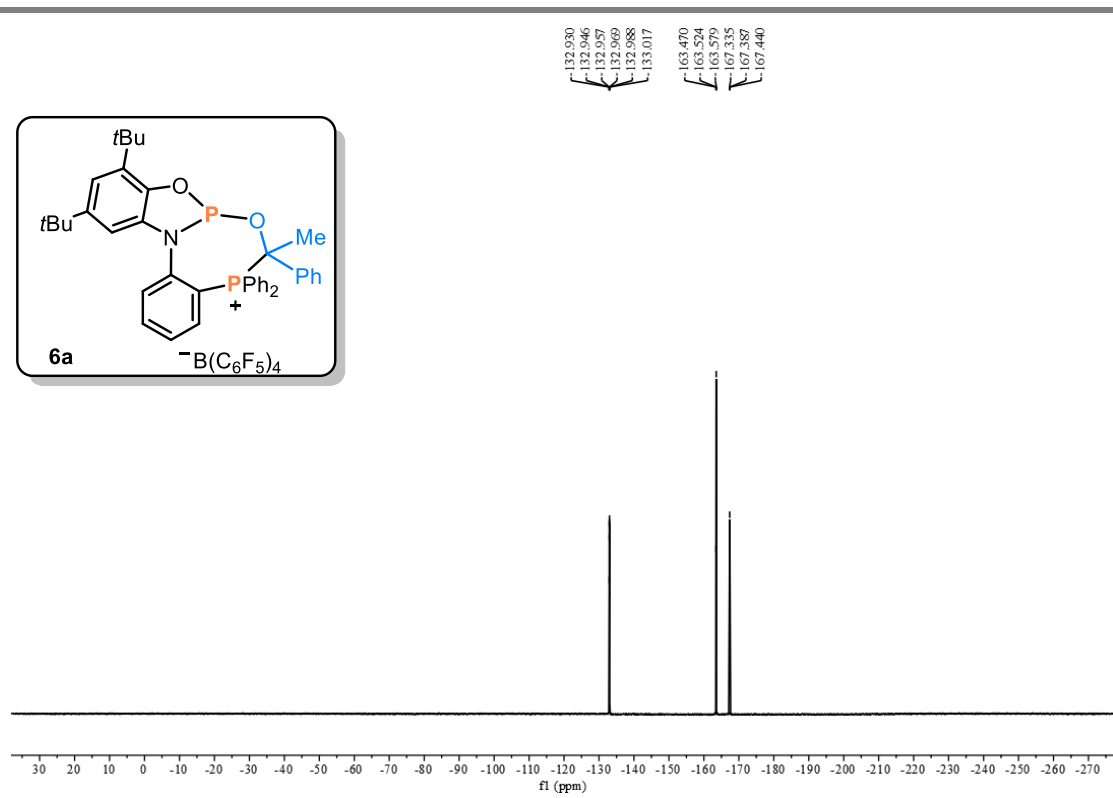

Figure S78: <sup>19</sup>F NMR of **6a** (376 MHz, CD<sub>2</sub>Cl<sub>2</sub>).

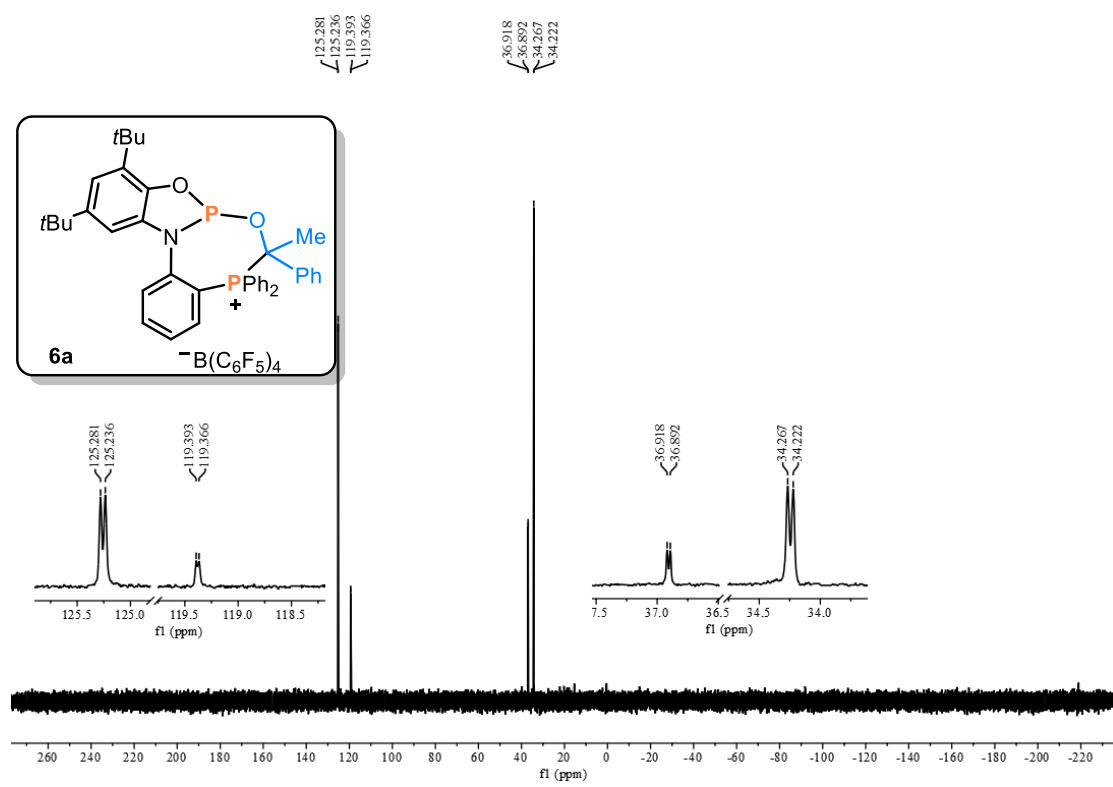

Figure S79: <sup>31</sup>P{<sup>1</sup>H} NMR of **6a** (243 MHz, CD<sub>2</sub>Cl<sub>2</sub>).

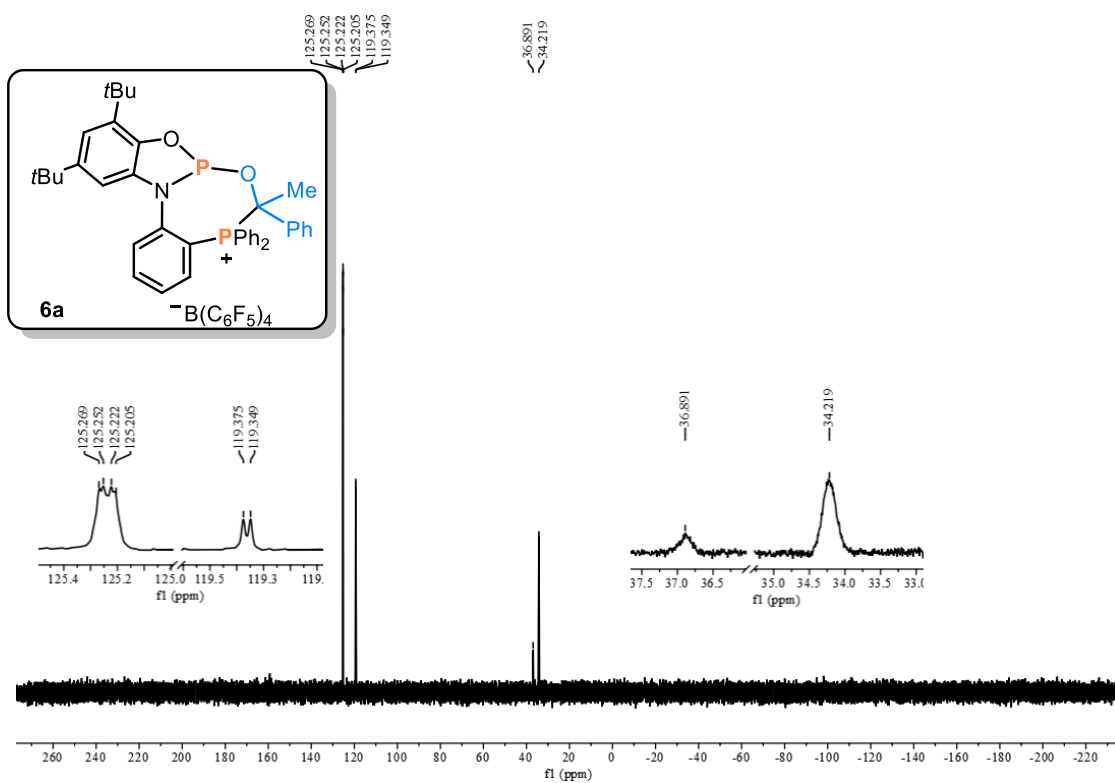

Figure S80:  $^{31}\text{P}$  NMR of **6a** (243 MHz,  $\text{CD}_2\text{Cl}_2$ ).



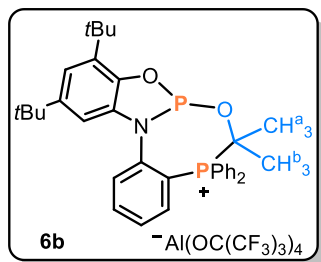

**2b** (50 mg, 33.8  $\mu\text{mol}$ , 1.0 equiv) was dissolved in  $\text{CH}_2\text{Cl}_2$  (2 mL), followed by the addition of acetone (7.9 mg, 135.3  $\mu\text{mol}$ , 4.0 equiv). A colorless solution was obtained. The volatiles were removed under reduced pressure and washed with pentane, then dried *in vacuo* to give **6b** as a white solid with containing small amount of unknown impurities (49.1 mg, 94% yield).

$^1\text{H NMR}$  (600 MHz,  $\text{CD}_2\text{Cl}_2$ ):  $\delta$  8.01 – 7.90 (m, 3H), 7.76 (tdd,  $J = 7.6, 3.4, 1.1$  Hz, 2H), 7.70 (ddt,  $J = 8.9, 7.9, 3.3$  Hz, 2H), 7.62 (t,  $J = 9.8$  Hz, 2H), 7.51 – 7.43 (m, 3H), 7.22 (ddd,  $J = 8.6, 7.4, 3.9$  Hz, 2H), 6.86 (d,  $J = 1.9$  Hz, 1H), 5.50 (d,  $J = 1.4$  Hz, 1H), 2.18 (dd,  $J = 16.0, 3.7$  Hz, 3H,  $\text{OCCH}^b\text{CH}_3$ ), 1.54 (d,  $J = 16.7$  Hz, 3H,  $\text{OCCH}_3\text{CH}^a$ ), 1.47 (s, 9H), 1.02 (s, 9H).

$^{13}\text{C}\{^1\text{H}\}$  NMR (151 MHz,  $\text{CD}_2\text{Cl}_2$ ):  $\delta$  147.0 (s, 1C), 144.7 (d,  $J = 14.1$  Hz, 1C), 142.0 (dd,  $J = 13.5, 6.6$  Hz, 1C), 138.2 (d,  $J = 2.7$  Hz, 1C), 136.5 (d,  $J = 6.9$  Hz, 1C), 136.4 (d,  $J = 3.1$  Hz, 1C), 136.2 (s, 1C), 135.4 (d,  $J = 3.0$  Hz, 1C), 134.9 (d,  $J = 9.0$  Hz, 2C), 134.8 (d,  $J = 8.8$  Hz, 2C), 133.0 (s, 1C), 132.2 (dd,  $J = 8.9, 3.2$  Hz, 1C), 131.2 (d,  $J = 11.8$  Hz, 2C), 130.2 (d,  $J = 12.2$  Hz, 2C), 129.9 (d,  $J = 11.1$  Hz, 1C), 121.7 (q,  $J = 292.4$  Hz,  $\text{OC}(\text{CF}_3)_4$ ), 117.0 (s, 1C), 116.6 (s, 1C), 116.1 (d,  $J = 3.3$  Hz, 1C), 115.6 (s, 1C), 104.1 (s, 1C), 75.0 (d,  $J = 50.1$  Hz, 1C), 34.9 (s, 1C), 34.9 (s, 1C), 31.6 (s, 3C), 29.7 (s, 3C), 27.8 (dd,  $J = 7.3, 2.1$  Hz, 1C), 26.8 (dd,  $J = 16.7, 8.4$  Hz, 1C).

$^{19}\text{F NMR}$  (376 MHz,  $\text{CD}_2\text{Cl}_2$ ):  $\delta$  -75.7.

$^{31}\text{P}\{^1\text{H}\}$  NMR (243 MHz,  $\text{CD}_2\text{Cl}_2$ ):  $\delta$  127.0 (d,  $J = 11.3$  Hz,  $\text{OPN}$ ), 34.6 (d,  $J = 11.3$  Hz,  $\text{PPh}_2$ ).

**HRMS** (ESI):  $[\text{C}_{35}\text{H}_{40}\text{NO}_2\text{P}_2]^+$ , calculated: 568.2529, found: 568.2530.

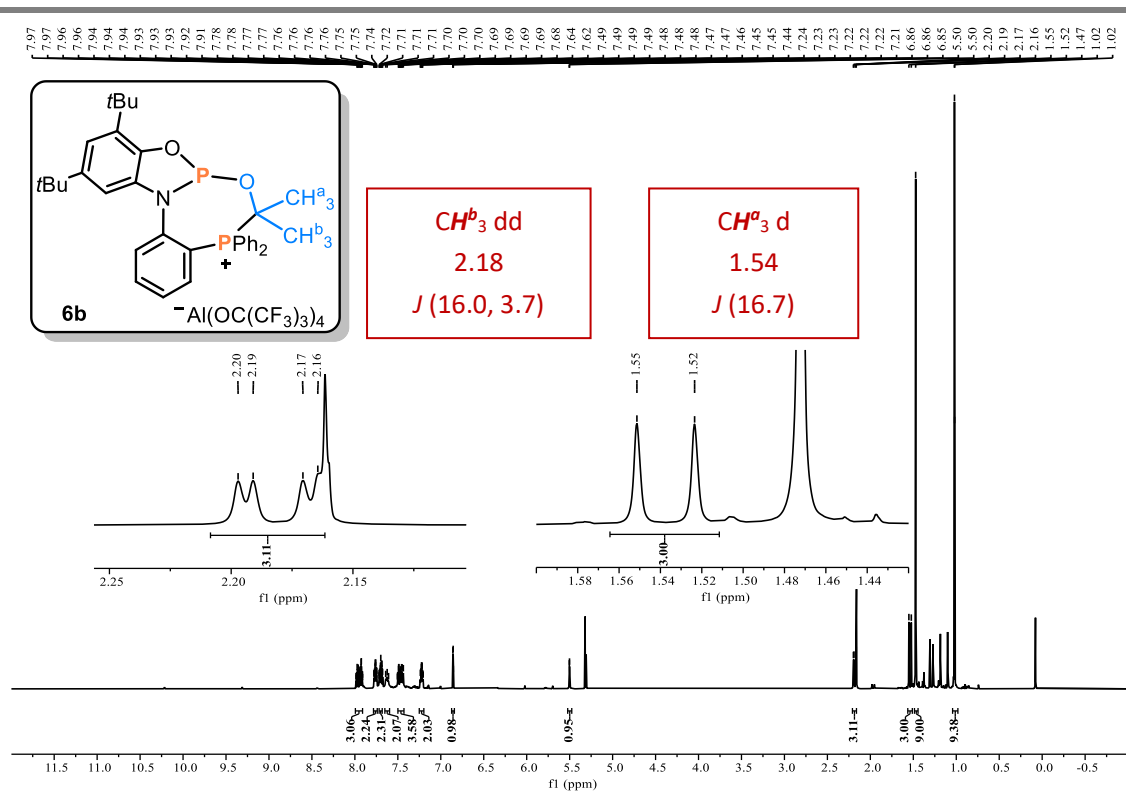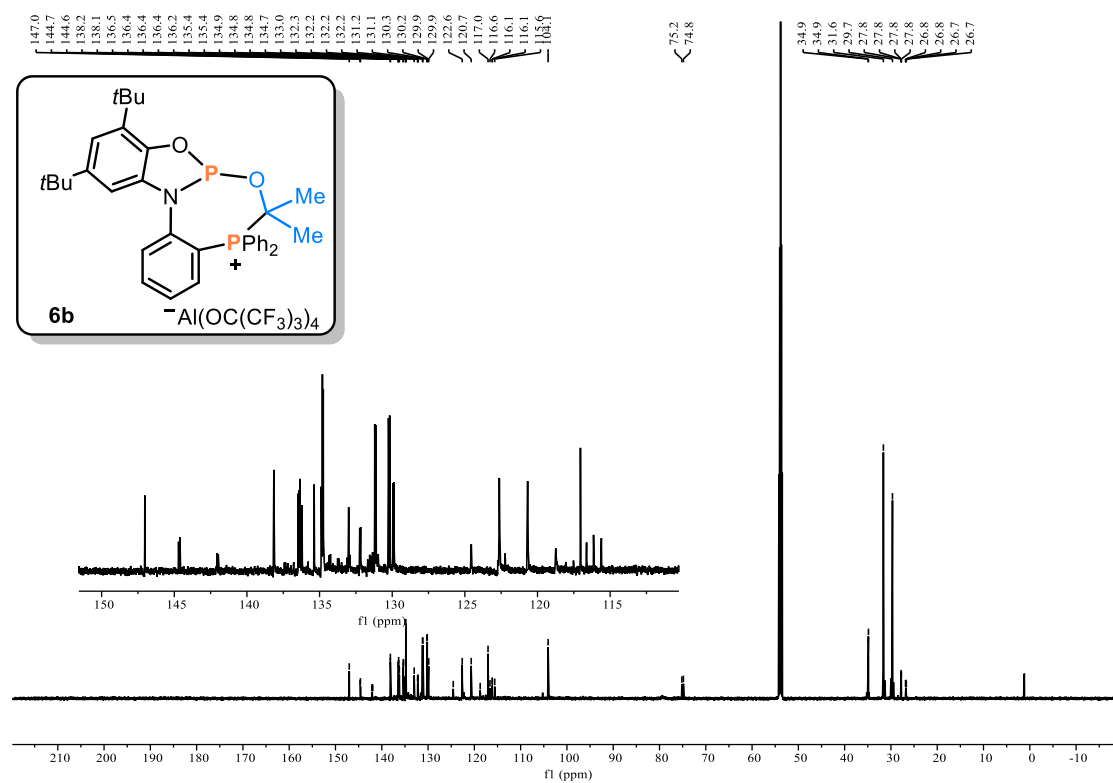

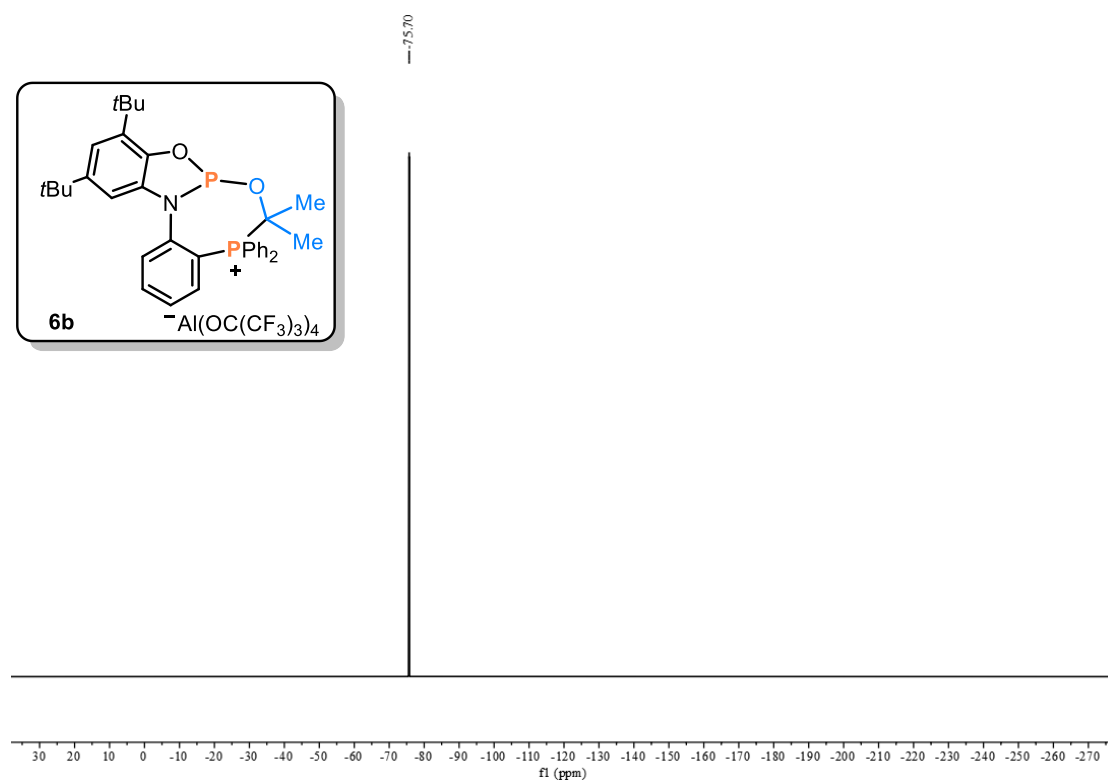

Figure S83:  $^{19}\text{F}$  NMR of **6b** (376 MHz,  $\text{CD}_2\text{Cl}_2$ ).

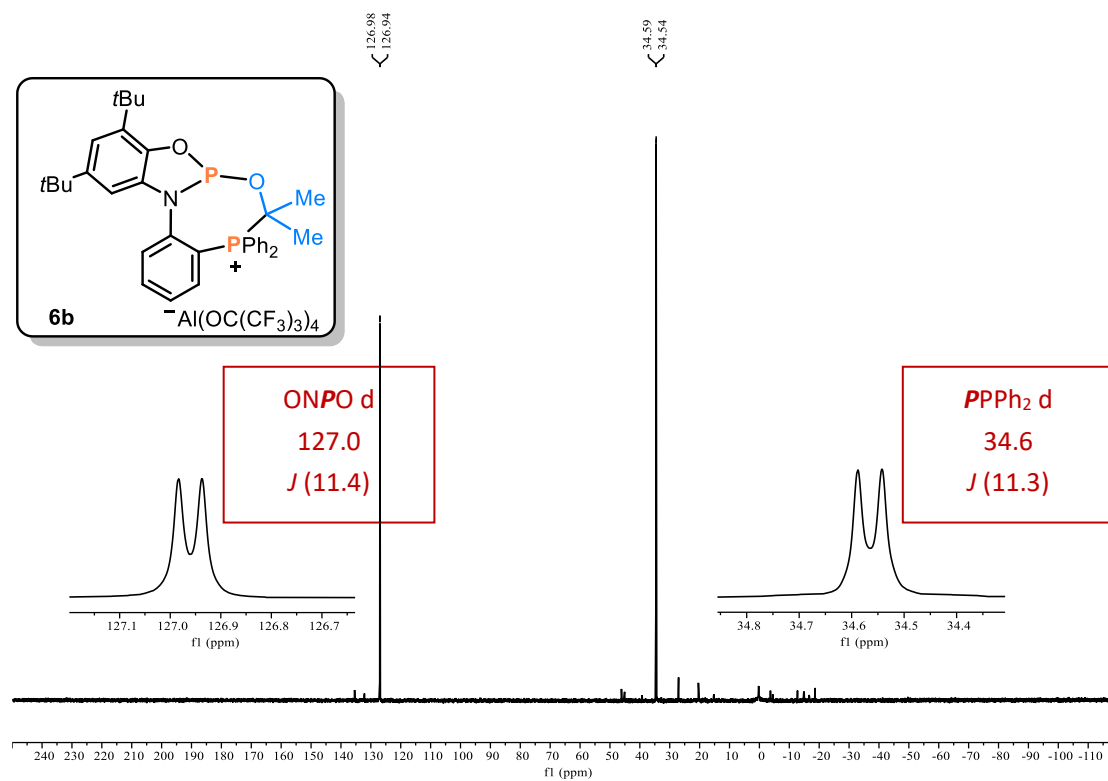

Figure S84:  $^{31}\text{P}\{^1\text{H}\}$  NMR of **6b** (243 MHz,  $\text{CD}_2\text{Cl}_2$ ).

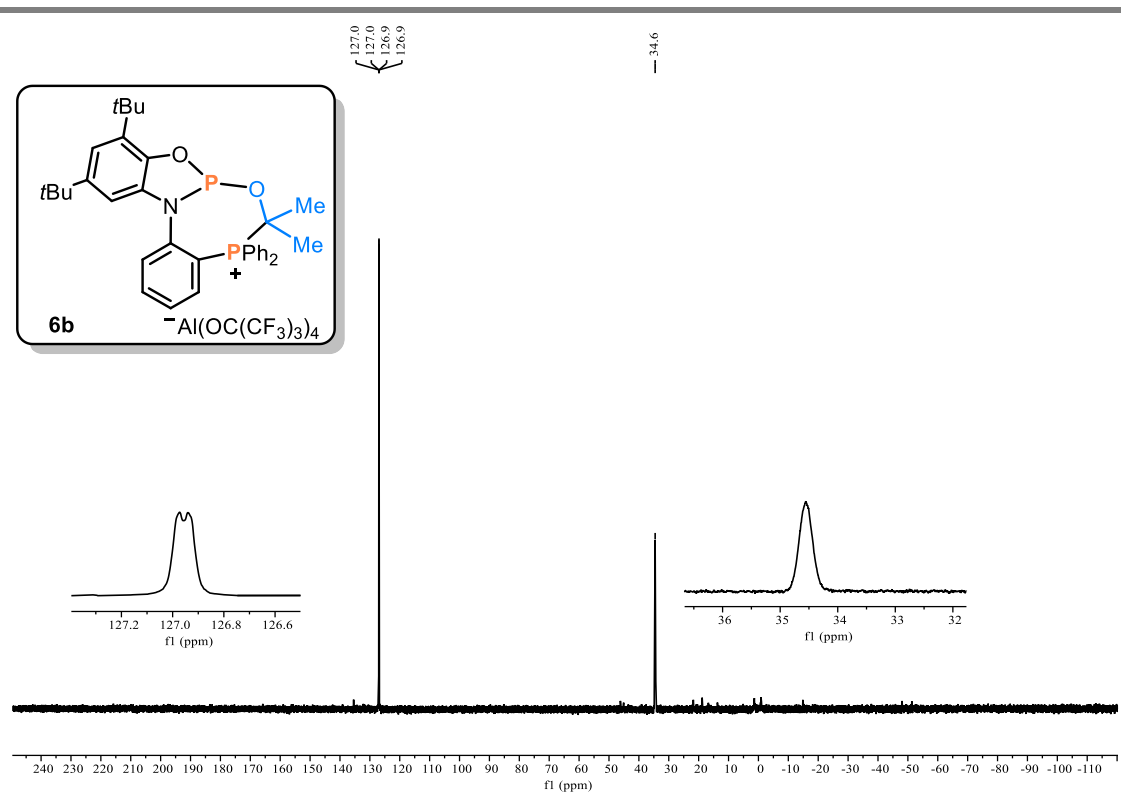

Figure S85:  $^{31}\text{P}$  NMR of **6b** (243 MHz,  $\text{CD}_2\text{Cl}_2$ ).

---

## 7. Coordination Chemistry

### 7.1 Steric profiles

Steric maps of crystallized compounds (**3a**,**3b**,**4a**,**4b**,**4c**,**5**,**6a**) are reported below, which were obtained using the SambVca 2.1 web application with a sphere radius of 3.5Å.<sup>4</sup>

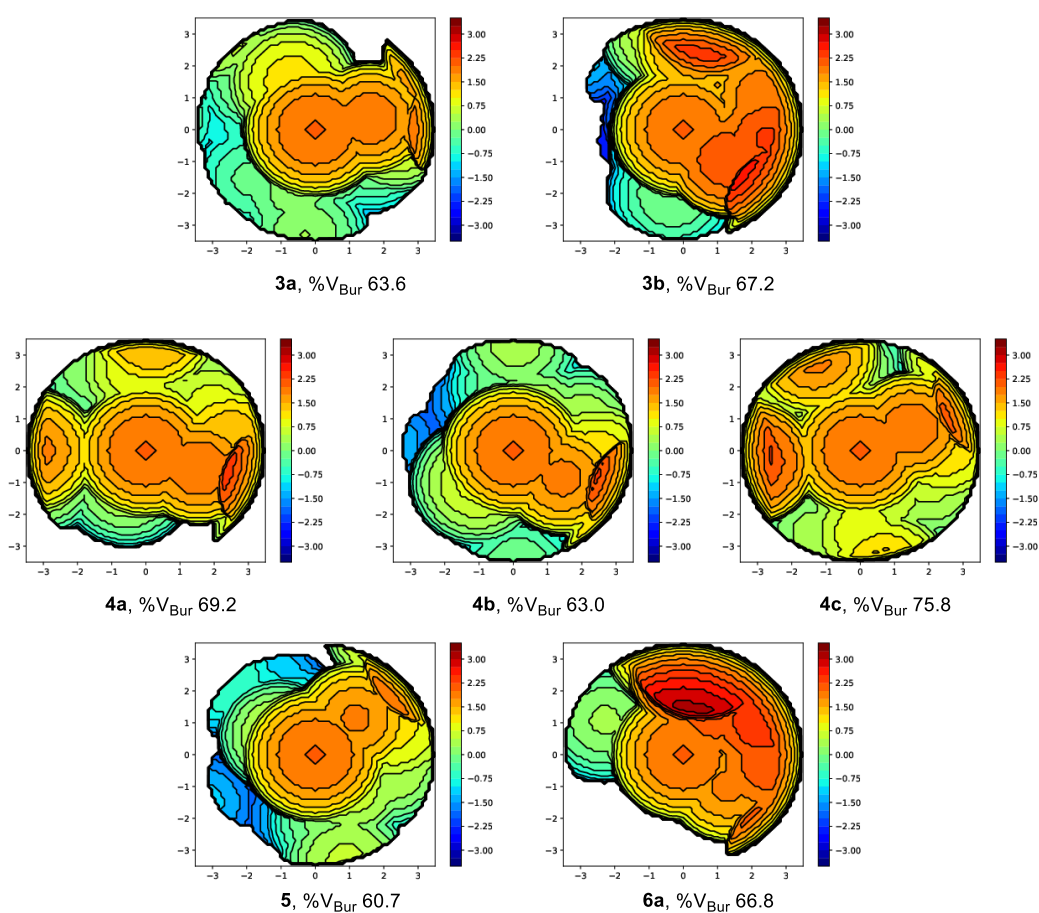

**Figure S86:** Steric maps of the crystallized compounds (**3a**,**3b**,**4a**,**4b**,**4c**,**5**,**6a**).

## 7.2 Reaction development

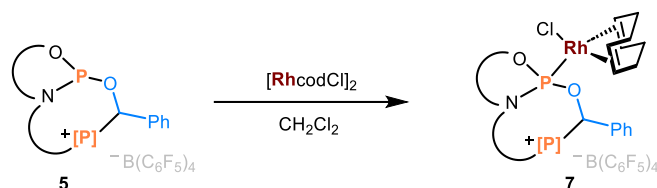

The colorless solid **5** (17 mg, 13.1  $\mu\text{mol}$ , 1.0 equiv) and  $[\text{RhcodCl}]_2$  (3.2 mg, 6.6  $\mu\text{mol}$ , 0.5 equiv) were weighed into a J. Young type NMR tube. An orange solution was obtained after adding  $\text{CD}_2\text{Cl}_2$  (0.5 mL), then probed by the multinuclear NMR data.

$^1\text{H}$  NMR (600 MHz,  $\text{CD}_2\text{Cl}_2$ ):  $\delta$  8.13 – 8.09 (m, 1H), 8.05 (dd,  $J = 8.1, 5.4$  Hz, 1H), 7.88 (tdd,  $J = 7.6, 2.4, 1.3$  Hz, 1H), 7.83 (ddd,  $J = 12.7, 8.4, 1.3$  Hz, 2H), 7.75 – 7.69 (m, 2H), 7.63 – 7.57 (m, 2H), 7.51 – 7.45 (m, 3H), 7.38 (tt,  $J = 7.5, 1.5$  Hz, 1H), 7.19 – 7.12 (m, 2H), 7.08 – 7.00 (m, 3H), 6.66 (dd,  $J = 7.7, 2.0$  Hz, 2H), 6.45 (d,  $J = 2.0$  Hz, 1H), 5.79 – 5.68 (m, 3H), 4.26 (d,  $J = 19.6$  Hz, 2H), 2.63 – 2.28 (m, 8H), 1.31 (s, 9H), 1.23 (s, 9H).

$^{11}\text{B}$  NMR (128 MHz,  $\text{CD}_2\text{Cl}_2$ ):  $\delta$  -16.7.

$^{13}\text{C}\{^1\text{H}\}$  NMR (151 MHz,  $\text{CD}_2\text{Cl}_2$ ): 149.5 – 149.2 (m,  $\text{BArF}_{20}$ ), 148.3, 147.8 – 147.6 (m,  $\text{BArF}_{20}$ ), 143.6 (d,  $J = 12.6$  Hz), 139.6 – 139.2 (m,  $\text{BArF}_{20}$ ), 137.9 – 137.6 (m,  $\text{BArF}_{20}$ ), 137.8 (d,  $J = 2.6$  Hz), 137.6 – 137.3 (m,  $\text{BArF}_{20}$ ), 137.5 (d,  $J = 8.5$  Hz), 136.7 (d,  $J = 3.2$  Hz), 136.6 (d,  $J = 10.1$  Hz), 136.3 (d,  $J = 3.1$  Hz), 136.0 – 135.7 (m,  $\text{BArF}_{20}$ ), 135.5 (d,  $J = 2.7$  Hz), 134.7 (dd,  $J = 7.7, 3.8$  Hz), 133.4 (d,  $J = 9.1$  Hz), 131.9 (d,  $J = 3.4$  Hz), 131.3 (d,  $J = 11.8$  Hz), 131.0 (d,  $J = 12.2$  Hz), 130.5 (d,  $J = 13.2$  Hz), 129.3 (d,  $J = 2.6$  Hz), 129.1 (d,  $J = 5.5$  Hz), 128.0 (d,  $J = 3.9$  Hz), 120.8 (dd,  $J = 82.6, 1.6$  Hz), 117.7 (dd,  $J = 16.4, 4.5$  Hz), 117.2, 117.0 (dd,  $J = 16.7, 5.5$  Hz), 116.5, 113.7, 113.1, 104.6 (d,  $J = 4.3$  Hz), 79.0 (d,  $J = 14.0$  Hz), 74.5 (dd,  $J = 58.7, 13.1$  Hz), 73.9 (d,  $J = 12.8$  Hz), 72.5 (d,  $J = 12.1$  Hz), 35.4, 34.9, 34.0, 33.0, 31.6, 29.5, 29.1 (d,  $J = 1.5$  Hz), 28.2 (d,  $J = 1.9$  Hz).

$^{19}\text{F}$  NMR (376 MHz,  $\text{CD}_2\text{Cl}_2$ ):  $\delta$  -133.1 (q,  $J = 9.8$  Hz), -163.7 (t,  $J = 20.4$  Hz), -165.07 – -171.96 (m).

$^{31}\text{P}\{^1\text{H}\}$  NMR (243 MHz,  $\text{CD}_2\text{Cl}_2$ ):  $\delta$  120.7 (d,  $^1J_{\text{RhP}} = 275.9$  Hz,  $\text{OPN}$ ), 27.2 (s,  $\text{PPh}_2$ ).

HRMS (ESI):  $[\text{C}_{47}\text{H}_{52}\text{ClNO}_2\text{P}_2\text{Rh}]^+$ , calculated: 862.2211, found: 862.2231.

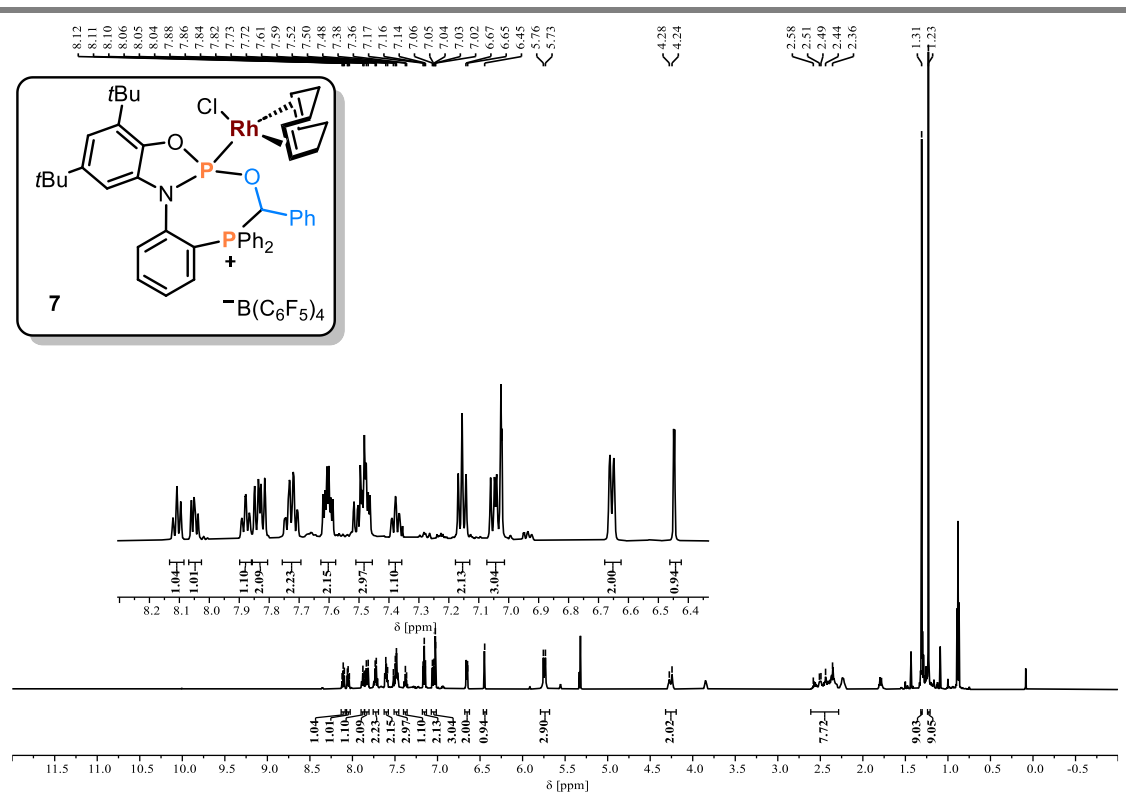

Figure S87: <sup>1</sup>H NMR of **7** (600 MHz, CD<sub>2</sub>Cl<sub>2</sub>).

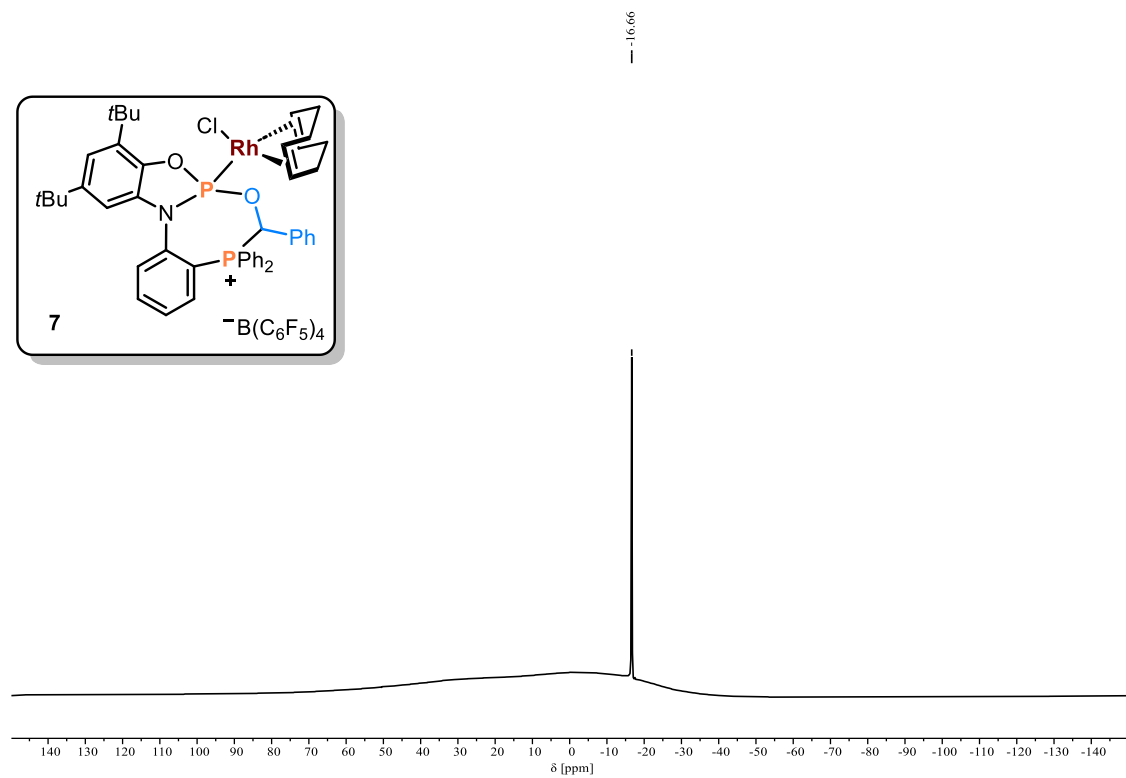

Figure S88: <sup>11</sup>B NMR of **7** (128 MHz, CD<sub>2</sub>Cl<sub>2</sub>).

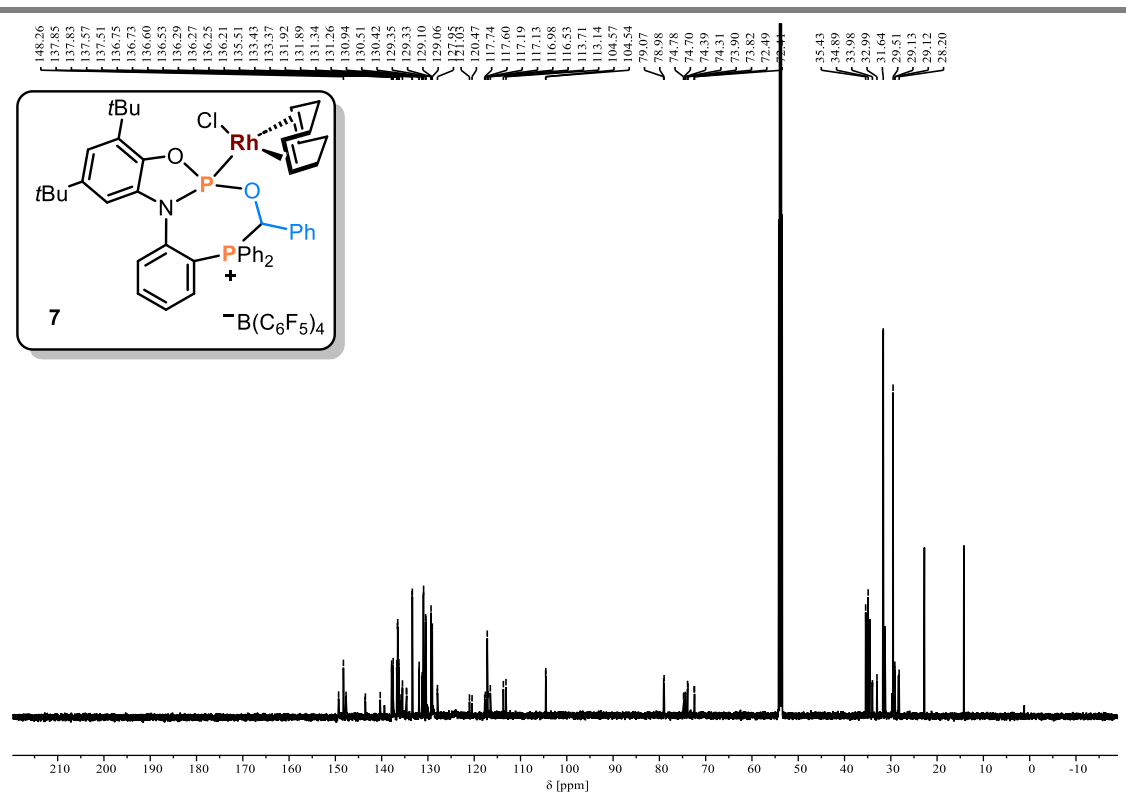

Figure S89:  $^{13}\text{C}$  NMR of 7 (151 MHz,  $\text{CD}_2\text{Cl}_2$ ).

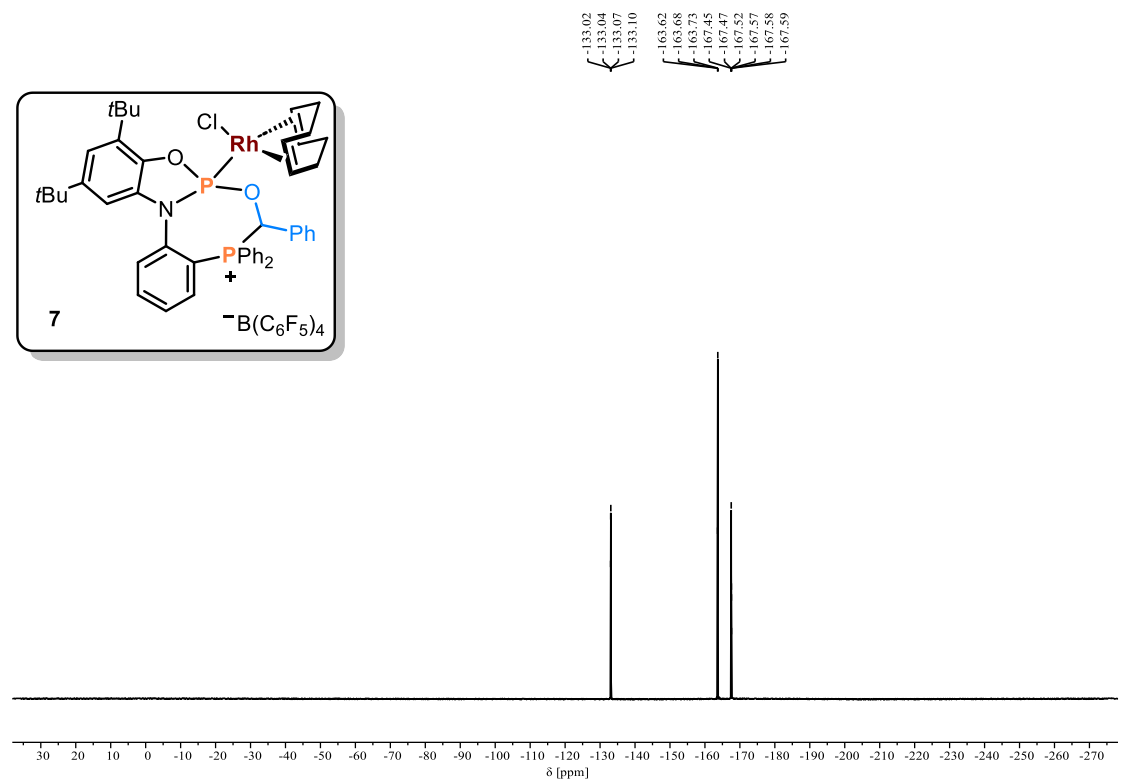

Figure S90:  $^{19}\text{F}$  NMR of 7 (376 MHz,  $\text{CD}_2\text{Cl}_2$ ).



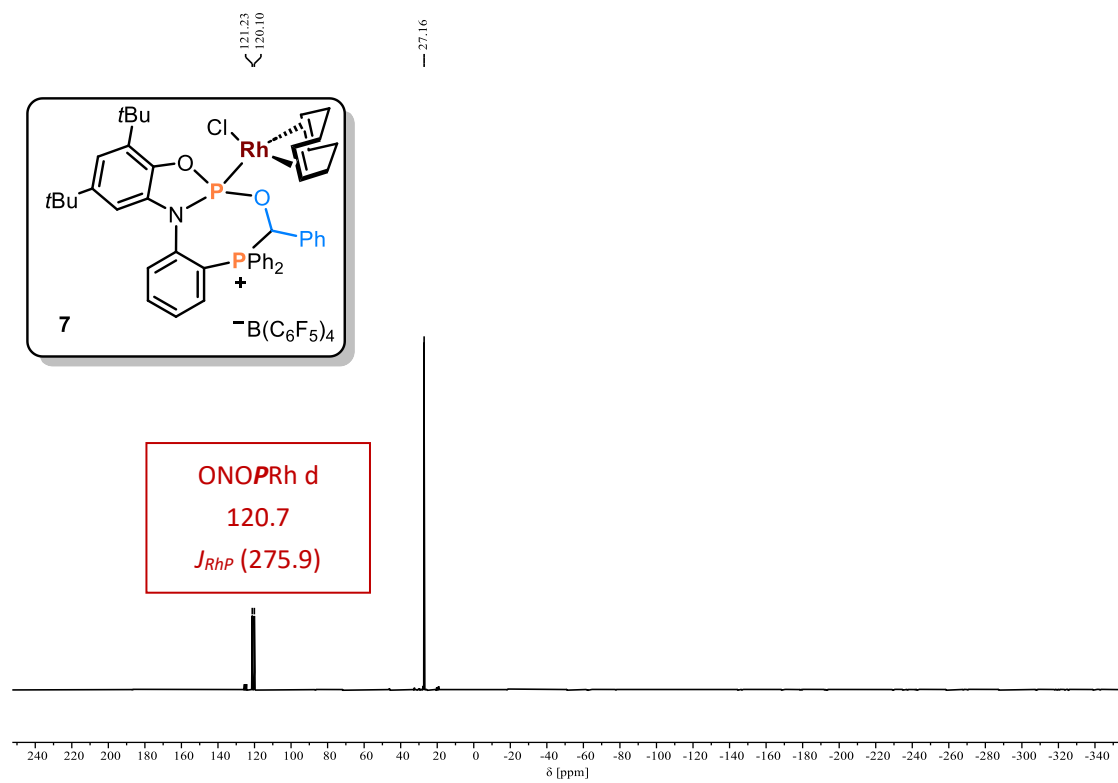

Figure S91:  $^{31}\text{P}\{^1\text{H}\}$  NMR of 7 (243 MHz,  $\text{CD}_2\text{Cl}_2$ ).

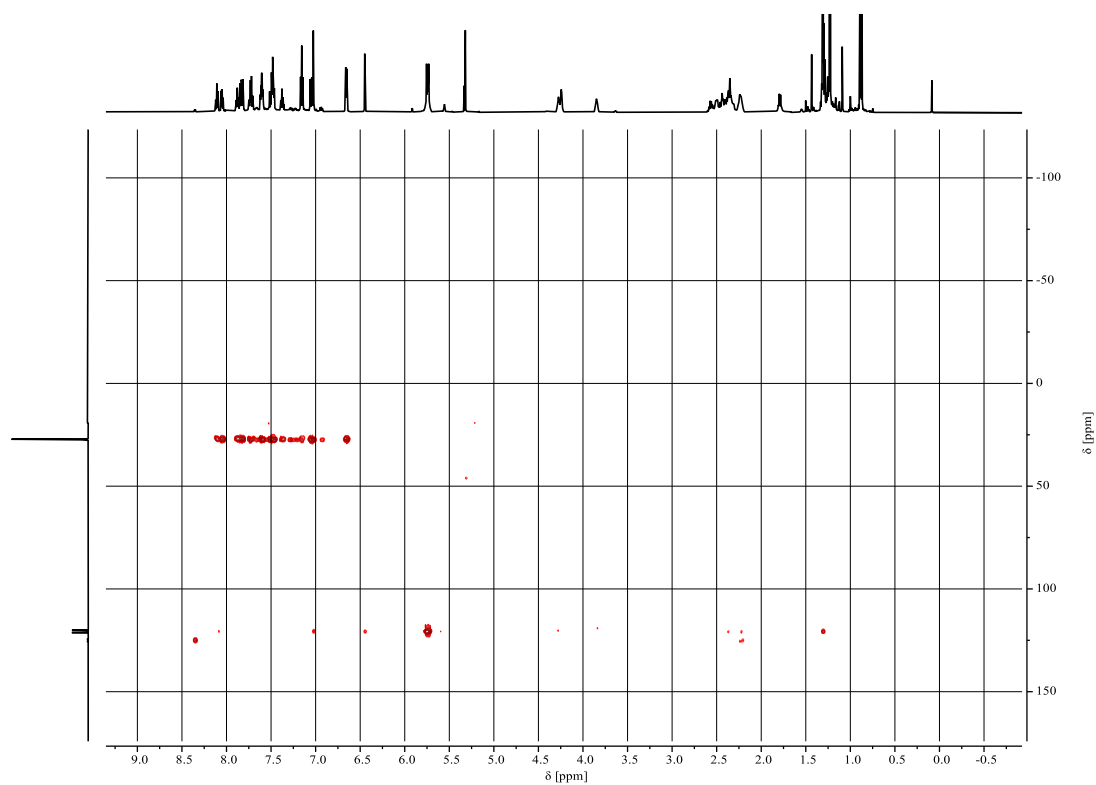

Figure S92:  $^1\text{H}-^{31}\text{P}$  HMBC NMR of 7 (243MHz,  $\text{CD}_2\text{Cl}_2$ ).

## 8. Optical Properties of Select Compounds

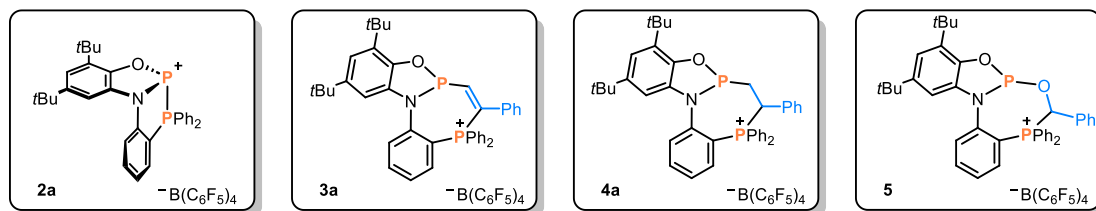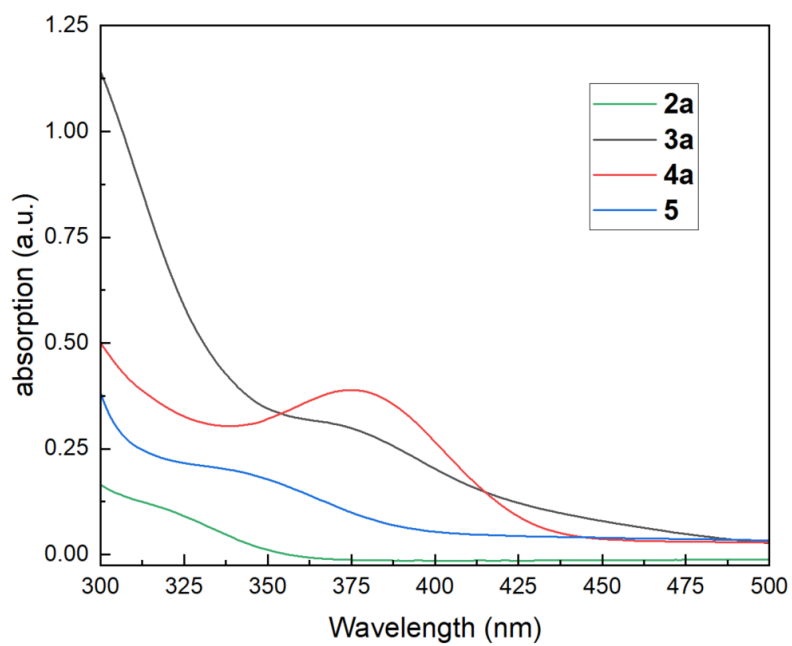

**Figure S93:** Absorption spectra of selected compounds (**2a**, **3a**, **4a**, and **5**) in  $\text{CH}_2\text{Cl}_2$  ( $1.0 \times 10^{-4}$  mol  $\text{L}^{-1}$ ).

---

## 9. X-Ray Diffraction

Suitable crystals were taken directly from the mother liquor, immersed in a perfluorinated ether oil and fixed on a cryo loop. The diffraction data were collected from a shock-cooled single crystal at 100 K on a Bruker D8 VENTURE dual wavelength Mo/Cu three-circle diffractometer with a microfocus sealed X-ray tube using mirror optics as monochromator and a Bruker PHOTON III detector. The diffractometer was equipped with an Oxford Cryostream 800 low temperature device and used MoK $\alpha$  radiation ( $\lambda = 0.71073 \text{ \AA}$ ). All data were integrated with SAINT and a multi-scan absorption correction using SADABS was applied.<sup>5</sup> The structures were solved by direct methods using SHELXT and refined by full-matrix least-squares methods against  $F^2$  by SHELXL-2018/3.<sup>6,7</sup> All non-hydrogen atoms were refined with anisotropic displacement parameters. The hydrogen atoms were refined isotropically on calculated positions using a riding model. Crystallographic data for the structures reported in this paper have been deposited with the Cambridge Crystallographic Data Centre.<sup>8</sup> CCDC 2357323-2357331 contain the supplementary crystallographic data for this paper. These data can be obtained free of charge from The Cambridge Crystallographic Data Centre via [www.ccdc.cam.ac.uk/structures](http://www.ccdc.cam.ac.uk/structures). This report and the CIF file were generated using FinalCif.<sup>9</sup>

## 9.1 Bond angles profile

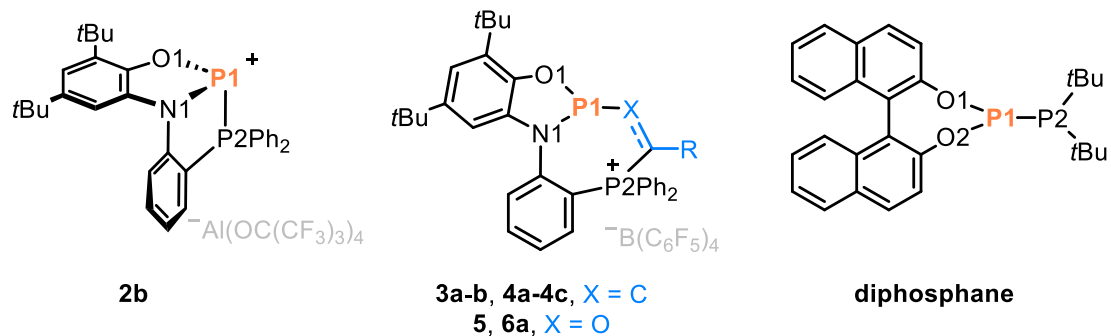

The bond angles around the central phosphorus (**P1**) are listed below.

| Compounds                       | $\angle \text{O1P1N1}$ | $\angle \text{O1P1P2}$ | $\angle \text{N1P1P2}$ |
|---------------------------------|------------------------|------------------------|------------------------|
| <b>2b</b>                       | 94.18(7)               | 104.53(5)              | 87.39(5)               |
|                                 | $\angle \text{O1P1N1}$ | $\angle \text{O1P1C}$  | $\angle \text{N1P1C}$  |
| <b>3a</b>                       | 93.09(11)              | 103.61(13)             | 99.06(13)              |
| <b>3b</b>                       | 92.82(11)              | 101.54(11)             | 100.65(11)             |
| <b>4a</b>                       | 92.66(6)               | 101.11(7)              | 98.24(7)               |
| <b>4b</b>                       | 91.29(12)              | 104.21(13)             | 98.48(13)              |
| <b>4c</b>                       | 92.51(7)               | 101.54(7)              | 96.42(8)               |
|                                 | $\angle \text{O1P1N1}$ | $\angle \text{O1P1O2}$ | $\angle \text{N1P1O2}$ |
| <b>5</b>                        | 90.22(6)               | 104.22(5)              | 100.76(5)              |
| <b>6a</b>                       | 92.17(5)               | 96.92(5)               | 99.81(5)               |
|                                 | $\angle \text{O1P1O2}$ | $\angle \text{O1P1P2}$ | $\angle \text{O2P1P2}$ |
| <b>Diphosphane<sup>10</sup></b> | 98.94(9)               | 98.78                  | 101.26(6)              |

---

## 9.2 X-ray crystallography

The structure **1** (PNOPCl) contains two crystallographically independent molecules and selected bond distances (Å) and angles (deg):  $d(\text{P1-O1}) = 1.6292(13)$ ,  $d(\text{P1-N1}) = 1.6815(14)$ ,  $\angle\text{O1-P1-N1} = 92.18(7)$  and  $d(\text{P3-O2}) = 1.6317(13)$ ,  $d(\text{P3-N2}) = 1.6859(14)$ ,  $\angle\text{O2-P3-N2} = 92.10(7)$ .

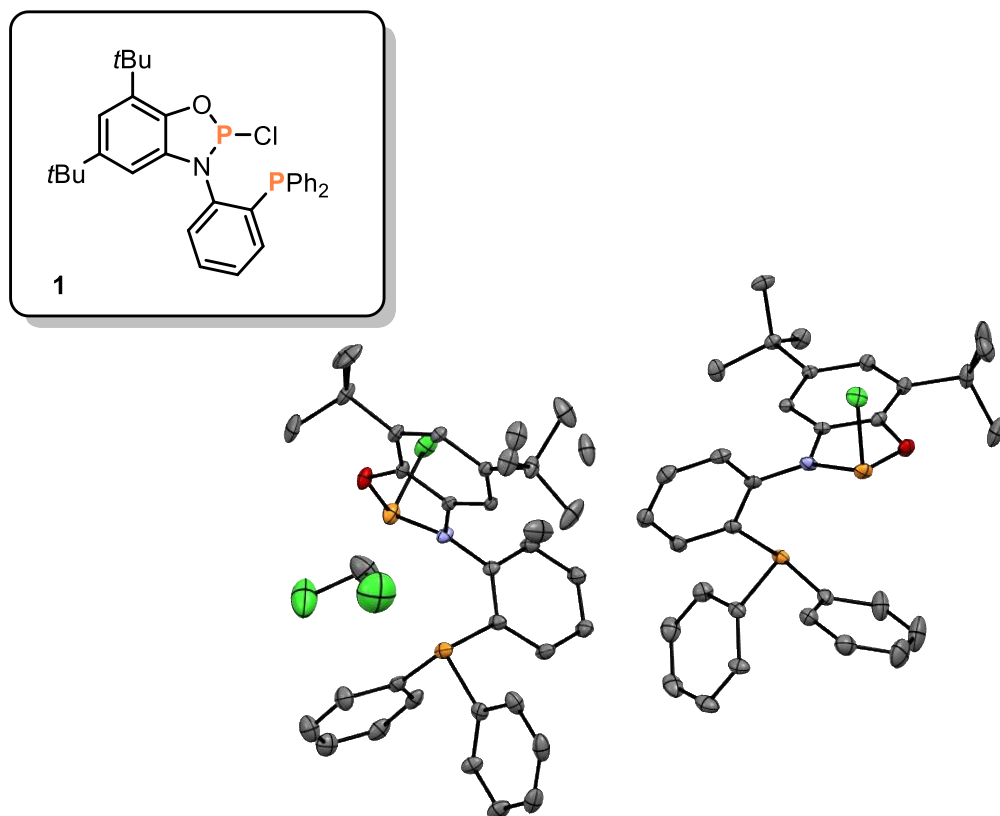

**Figure S94:** Thermal ellipsoid plot of **1** at 50 % probability. All carbon-based hydrogen atoms were omitted for clarity.

**Table S1.** Crystallographic data and structure refinement for compound **1**.

|                                                                   |                                                                     |
|-------------------------------------------------------------------|---------------------------------------------------------------------|
| CCDC number                                                       | 2357326                                                             |
| Empirical formula                                                 | C <sub>32.50</sub> H <sub>34</sub> Cl <sub>2</sub> NOP <sub>2</sub> |
| Formula weight                                                    | 587.45                                                              |
| Temperature [K]                                                   | 100(2)                                                              |
| Crystal system                                                    | triclinic                                                           |
| Space group (number)                                              | $P\bar{1}$ (2)                                                      |
| <i>a</i> [Å]                                                      | 12.944(5)                                                           |
| <i>b</i> [Å]                                                      | 13.582(4)                                                           |
| <i>c</i> [Å]                                                      | 19.223(7)                                                           |
| $\alpha$ [°]                                                      | 103.948(13)                                                         |
| $\beta$ [°]                                                       | 103.841(14)                                                         |
| $\gamma$ [°]                                                      | 97.750(13)                                                          |
| Volume [Å <sup>3</sup> ]                                          | 3117.4(18)                                                          |
| <i>Z</i>                                                          | 4                                                                   |
| $\rho_{\text{calc}}$ [gcm <sup>-3</sup> ]                         | 1.252                                                               |
| $\mu$ [mm <sup>-1</sup> ]                                         | 0.337                                                               |
| <i>F</i> (000)                                                    | 1232                                                                |
| Crystal size [mm <sup>3</sup> ]                                   | 0.376×0.343×0.210                                                   |
| Crystal colour                                                    | colourless                                                          |
| Crystal shape                                                     | block                                                               |
| Radiation                                                         | MoK $\alpha$ ( $\lambda$ =0.71073 Å)                                |
| 2 $\theta$ range [°]                                              | 4.08 to 61.79 (0.69 Å)                                              |
| Index ranges                                                      | -18 ≤ <i>h</i> ≤ 18<br>-19 ≤ <i>k</i> ≤ 19<br>-27 ≤ <i>l</i> ≤ 27   |
| Reflections collected                                             | 151734                                                              |
| Independent reflections                                           | 19305<br>$R_{\text{int}} = 0.0971$<br>$R_{\text{sigma}} = 0.0565$   |
| Completeness to<br>$\theta = 25.242^\circ$                        | 99.9 %                                                              |
| Data / Restraints / Parameters                                    | 19305/154/738                                                       |
| Absorption correction<br>$T_{\text{min}}/T_{\text{max}}$ (method) | 0.6612/0.7461<br>(multi-scan)                                       |
| Goodness-of-fit on $F^2$                                          | 1.089                                                               |
| Final <i>R</i> indexes<br>[ $I \geq 2\sigma(I)$ ]                 | $R_1 = 0.0565$<br>$wR_2 = 0.1423$                                   |
| Final <i>R</i> indexes<br>[all data]                              | $R_1 = 0.0684$<br>$wR_2 = 0.1546$                                   |
| Largest peak/hole [eÅ <sup>-3</sup> ]                             | 1.36/-1.43                                                          |

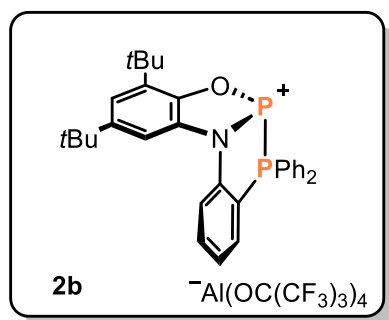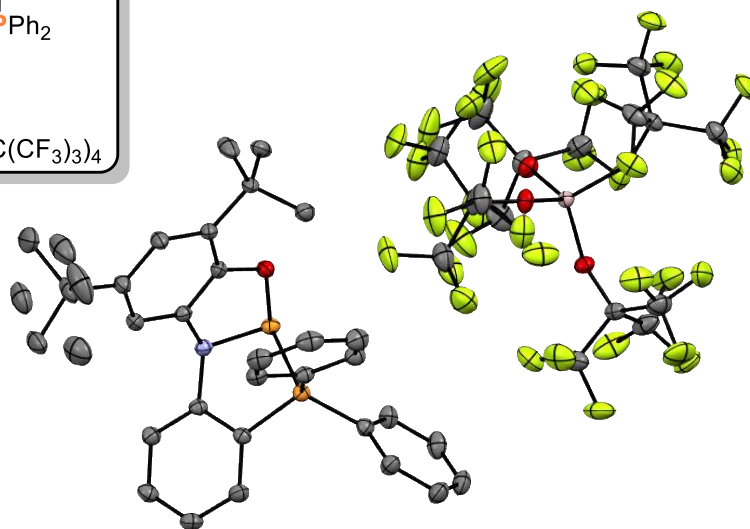

**Figure S95:** Thermal ellipsoid plot of **2b** at 50 % probability. All carbon-based hydrogen atoms were omitted for clarity.

**Table S2.** Crystallographic data and structure refinement for compound **2b**.

|                                                                                     |                                                                                  |
|-------------------------------------------------------------------------------------|----------------------------------------------------------------------------------|
| CCDC number                                                                         | 2357328                                                                          |
| Empirical formula                                                                   | C <sub>48</sub> H <sub>34</sub> AlF <sub>36</sub> NO <sub>5</sub> P <sub>2</sub> |
| Formula weight                                                                      | 1477.68                                                                          |
| Temperature [K]                                                                     | 120(2)                                                                           |
| Crystal system                                                                      | orthorhombic                                                                     |
| Space group (number)                                                                | <i>Pbca</i> (61)                                                                 |
| <i>a</i> [Å]                                                                        | 20.836(13)                                                                       |
| <i>b</i> [Å]                                                                        | 18.713(9)                                                                        |
| <i>c</i> [Å]                                                                        | 29.740(14)                                                                       |
| $\alpha$ [°]                                                                        | 90                                                                               |
| $\beta$ [°]                                                                         | 90                                                                               |
| $\gamma$ [°]                                                                        | 90                                                                               |
| Volume [Å <sup>3</sup> ]                                                            | 11595(10)                                                                        |
| <i>Z</i>                                                                            | 8                                                                                |
| $\rho_{\text{calc}}$ [gcm <sup>-3</sup> ]                                           | 1.693                                                                            |
| $\mu$ [mm <sup>-1</sup> ]                                                           | 0.252                                                                            |
| <i>F</i> (000)                                                                      | 5888                                                                             |
| Crystal size [mm <sup>3</sup> ]                                                     | 0.209×0.200×0.160                                                                |
| Crystal colour                                                                      | yellow                                                                           |
| Crystal shape                                                                       | block                                                                            |
| Radiation                                                                           | MoK $\alpha$ ( $\lambda$ =0.71073 Å)                                             |
| 2 $\theta$ range [°]                                                                | 3.91 to 59.08 (0.72 Å)                                                           |
| Index ranges                                                                        | -28 ≤ <i>h</i> ≤ 28<br>-25 ≤ <i>k</i> ≤ 25<br>-40 ≤ <i>l</i> ≤ 40                |
| Reflections collected                                                               | 262857                                                                           |
| Independent reflections                                                             | 15702<br><i>R</i> <sub>int</sub> = 0.0831<br><i>R</i> <sub>sigma</sub> = 0.0343  |
| Completeness to<br>$\theta = 25.242^\circ$                                          | 99.8 %                                                                           |
| Data / Restraints / Parameters                                                      | 15702/2994/875                                                                   |
| Absorption correction<br><i>T</i> <sub>min</sub> / <i>T</i> <sub>max</sub> (method) | 0.6129/0.7458<br>(multi-scan)                                                    |
| Goodness-of-fit on <i>F</i> <sup>2</sup>                                            | 1.018                                                                            |
| Final <i>R</i> indexes<br>[ <i>I</i> ≥ 2 $\sigma$ ( <i>I</i> )]                     | <i>R</i> <sub>1</sub> = 0.0445<br><i>wR</i> <sub>2</sub> = 0.1137                |
| Final <i>R</i> indexes<br>[all data]                                                | <i>R</i> <sub>1</sub> = 0.0659<br><i>wR</i> <sub>2</sub> = 0.1326                |
| Largest peak/hole [eÅ <sup>-3</sup> ]                                               | 0.59/-0.40                                                                       |



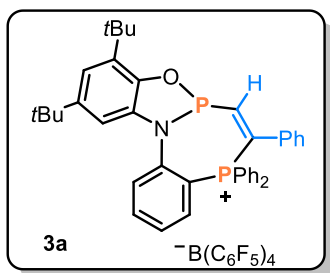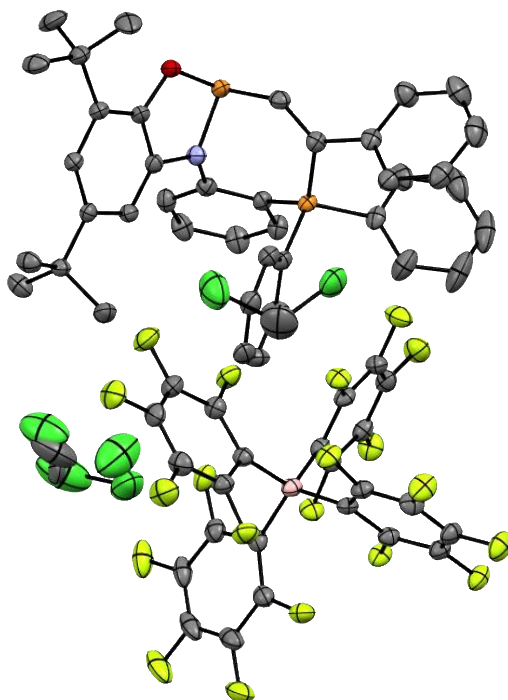

**Figure S96:** Thermal ellipsoid plot of **3a** at 50 % probability. All carbon-based hydrogen atoms were omitted for clarity.

**Table S3.** Crystallographic data and structure refinement for compound **3a**.

|                                                                                     |                                                                                   |
|-------------------------------------------------------------------------------------|-----------------------------------------------------------------------------------|
| CCDC number                                                                         | 2357323                                                                           |
| Empirical formula                                                                   | C <sub>66</sub> H <sub>44</sub> BCl <sub>4</sub> F <sub>20</sub> NOP <sub>2</sub> |
| Formula weight                                                                      | 1461.57                                                                           |
| Temperature [K]                                                                     | 120(2)                                                                            |
| Crystal system                                                                      | triclinic                                                                         |
| Space group (number)                                                                | $P\bar{1}$ (2)                                                                    |
| <i>a</i> [Å]                                                                        | 13.370(6)                                                                         |
| <i>b</i> [Å]                                                                        | 15.247(8)                                                                         |
| <i>c</i> [Å]                                                                        | 16.300(6)                                                                         |
| $\alpha$ [°]                                                                        | 87.59(2)                                                                          |
| $\beta$ [°]                                                                         | 75.11(2)                                                                          |
| $\gamma$ [°]                                                                        | 79.81(2)                                                                          |
| Volume [Å <sup>3</sup> ]                                                            | 3161(2)                                                                           |
| <i>Z</i>                                                                            | 2                                                                                 |
| $\rho_{\text{calc}}$ [gcm <sup>-3</sup> ]                                           | 1.536                                                                             |
| $\mu$ [mm <sup>-1</sup> ]                                                           | 0.342                                                                             |
| <i>F</i> (000)                                                                      | 1476                                                                              |
| Crystal size [mm <sup>3</sup> ]                                                     | 0.40×0.24×0.22                                                                    |
| Crystal colour                                                                      | orange                                                                            |
| Crystal shape                                                                       | block                                                                             |
| Radiation                                                                           | MoK $\alpha$ ( $\lambda$ =0.71073 Å)                                              |
| 2 $\theta$ range [°]                                                                | 3.74 to 52.05 (0.81 Å)                                                            |
| Index ranges                                                                        | -15 ≤ <i>h</i> ≤ 16<br>-18 ≤ <i>k</i> ≤ 18<br>0 ≤ <i>l</i> ≤ 19                   |
| Reflections collected                                                               | 12120                                                                             |
| Independent reflections                                                             | 12120<br><i>R</i> <sub>int</sub> = 0.1014<br><i>R</i> <sub>sigma</sub> = 0.0390   |
| Completeness to<br>$\theta = 25.242^\circ$                                          | 99.6 %                                                                            |
| Data / Restraints / Parameters                                                      | 12120/71/890                                                                      |
| Absorption correction<br><i>T</i> <sub>min</sub> / <i>T</i> <sub>max</sub> (method) | 0.593959/0.745263<br>(multi-scan)                                                 |
| Goodness-of-fit on <i>F</i> <sup>2</sup>                                            | 1.023                                                                             |
| Final <i>R</i> indexes<br>[ <i>I</i> ≥ 2 $\sigma$ ( <i>I</i> )]                     | <i>R</i> <sub>1</sub> = 0.0590<br><i>wR</i> <sub>2</sub> = 0.1533                 |
| Final <i>R</i> indexes<br>[all data]                                                | <i>R</i> <sub>1</sub> = 0.0714<br><i>wR</i> <sub>2</sub> = 0.1614                 |
| Largest peak/hole [eÅ <sup>-3</sup> ]                                               | 0.83/-0.70                                                                        |

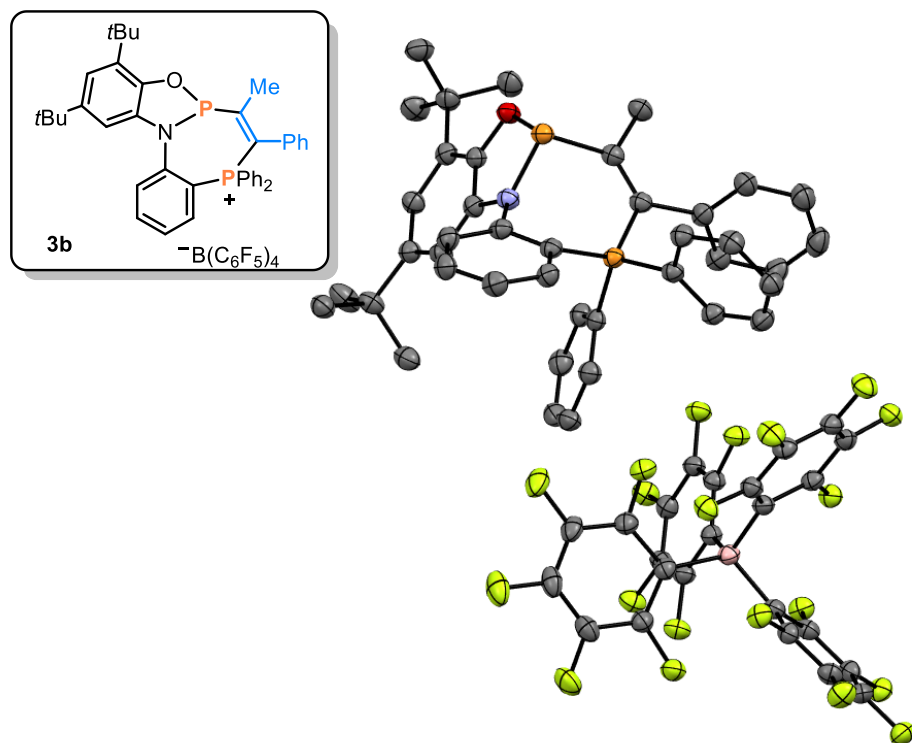

**Figure S97:** Thermal ellipsoid plot of **3b** at 50 % probability. All carbon-based hydrogen atoms were omitted for clarity.

**Table S4.** Crystallographic data and structure refinement for compound **3b**.

|                                                                                     |                                                                   |
|-------------------------------------------------------------------------------------|-------------------------------------------------------------------|
| CCDC number                                                                         | 2357325                                                           |
| Empirical formula                                                                   | C <sub>65</sub> H <sub>42</sub> BF <sub>20</sub> NOP <sub>2</sub> |
| Formula weight                                                                      | 1305.74                                                           |
| Temperature [K]                                                                     | 100(2)                                                            |
| Crystal system                                                                      | triclinic                                                         |
| Space group (number)                                                                | $P\bar{1}$ (2)                                                    |
| <i>a</i> [Å]                                                                        | 13.124(8)                                                         |
| <i>b</i> [Å]                                                                        | 16.183(14)                                                        |
| <i>c</i> [Å]                                                                        | 17.493(13)                                                        |
| $\alpha$ [°]                                                                        | 110.67(3)                                                         |
| $\beta$ [°]                                                                         | 95.58(2)                                                          |
| $\gamma$ [°]                                                                        | 113.696(18)                                                       |
| Volume [Å <sup>3</sup> ]                                                            | 3056(4)                                                           |
| <i>Z</i>                                                                            | 2                                                                 |
| $\rho_{\text{calc}}$ [gcm <sup>-3</sup> ]                                           | 1.419                                                             |
| $\mu$ [mm <sup>-1</sup> ]                                                           | 0.176                                                             |
| <i>F</i> (000)                                                                      | 1324                                                              |
| Crystal size [mm <sup>3</sup> ]                                                     | 0.147×0.139×0.076                                                 |
| Crystal colour                                                                      | orange                                                            |
| Crystal shape                                                                       | block                                                             |
| Radiation                                                                           | MoK $\alpha$ ( $\lambda$ =0.71073 Å)                              |
| 2 $\theta$ range [°]                                                                | 3.75 to 53.87 (0.78 Å)                                            |
| Index ranges                                                                        | -16 ≤ <i>h</i> ≤ 16<br>-20 ≤ <i>k</i> ≤ 20<br>-22 ≤ <i>l</i> ≤ 22 |
| Reflections collected                                                               | 118125                                                            |
| Independent reflections                                                             | 13150<br>$R_{\text{int}} = 0.1178$<br>$R_{\text{sigma}} = 0.0718$ |
| Completeness to<br>$\theta = 25.242^\circ$                                          | 99.9 %                                                            |
| Data / Restraints / Parameters                                                      | 13150/0/820                                                       |
| Absorption correction<br><i>T</i> <sub>min</sub> / <i>T</i> <sub>max</sub> (method) | 0.646/0.7454<br>(multi-scan)                                      |
| Goodness-of-fit on <i>F</i> <sup>2</sup>                                            | 1.015                                                             |
| Final <i>R</i> indexes<br>[ $I \geq 2\sigma(I)$ ]                                   | $R_1 = 0.0512$<br>$wR_2 = 0.1253$                                 |
| Final <i>R</i> indexes<br>[all data]                                                | $R_1 = 0.0862$<br>$wR_2 = 0.1461$                                 |
| Largest peak/hole [eÅ <sup>-3</sup> ]                                               | 0.35/-0.35                                                        |
| Extinction coefficient                                                              | 0.0152(9)                                                         |

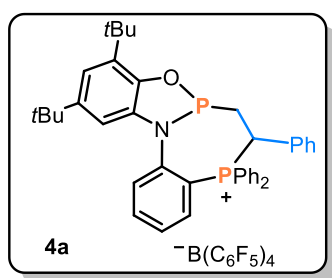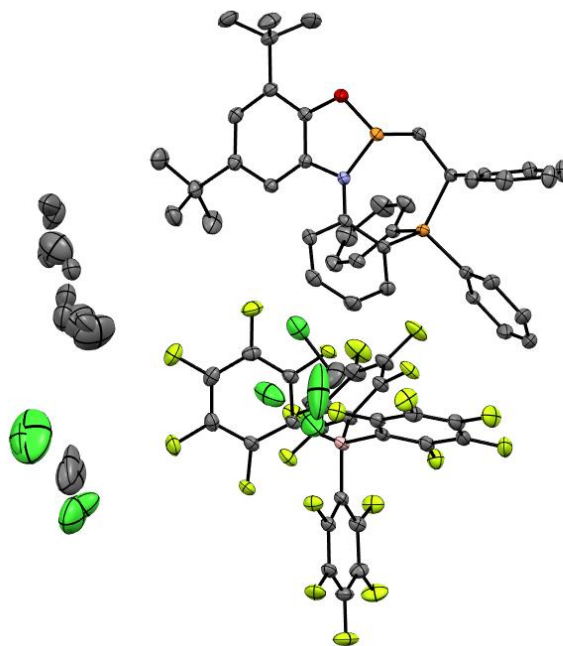

**Figure S98:** Thermal ellipsoid plot of **4a** at 50 % probability. All carbon-based hydrogen atoms were omitted for clarity.

**Table S5.** Crystallographic data and structure refinement for compound **4a**.

|                                                                                     |                                                                                   |
|-------------------------------------------------------------------------------------|-----------------------------------------------------------------------------------|
| CCDC number                                                                         | 2357331                                                                           |
| Empirical formula                                                                   | C <sub>71</sub> H <sub>58</sub> BCl <sub>4</sub> F <sub>20</sub> NOP <sub>2</sub> |
| Formula weight                                                                      | 1535.73                                                                           |
| Temperature [K]                                                                     | 120(2)                                                                            |
| Crystal system                                                                      | triclinic                                                                         |
| Space group (number)                                                                | $P\bar{1}$ (2)                                                                    |
| <i>a</i> [Å]                                                                        | 13.127(4)                                                                         |
| <i>b</i> [Å]                                                                        | 16.617(4)                                                                         |
| <i>c</i> [Å]                                                                        | 17.814(6)                                                                         |
| $\alpha$ [°]                                                                        | 114.495(14)                                                                       |
| $\beta$ [°]                                                                         | 98.862(18)                                                                        |
| $\gamma$ [°]                                                                        | 91.899(18)                                                                        |
| Volume [Å <sup>3</sup> ]                                                            | 3473.5(18)                                                                        |
| <i>Z</i>                                                                            | 2                                                                                 |
| $\rho_{\text{calc}}$ [gcm <sup>-3</sup> ]                                           | 1.468                                                                             |
| $\mu$ [mm <sup>-1</sup> ]                                                           | 0.315                                                                             |
| <i>F</i> (000)                                                                      | 1564                                                                              |
| Crystal size [mm <sup>3</sup> ]                                                     | 0.343×0.329×0.319                                                                 |
| Crystal colour                                                                      | yellow                                                                            |
| Crystal shape                                                                       | block                                                                             |
| Radiation                                                                           | MoK $\alpha$ ( $\lambda$ =0.71073 Å)                                              |
| 2 $\theta$ range [°]                                                                | 3.68 to 61.02 (0.70 Å)                                                            |
| Index ranges                                                                        | -18 ≤ <i>h</i> ≤ 18<br>-23 ≤ <i>k</i> ≤ 23<br>-25 ≤ <i>l</i> ≤ 25                 |
| Reflections collected                                                               | 216120                                                                            |
| Independent reflections                                                             | 20898<br><i>R</i> <sub>int</sub> = 0.0849<br><i>R</i> <sub>sigma</sub> = 0.0509   |
| Completeness to<br>$\theta = 25.242^\circ$                                          | 99.8 %                                                                            |
| Data / Restraints / Parameters                                                      | 20898/291/1013                                                                    |
| Absorption correction<br><i>T</i> <sub>min</sub> / <i>T</i> <sub>max</sub> (method) | 0.6779/0.7225<br>(multi-scan)                                                     |
| Goodness-of-fit on <i>F</i> <sup>2</sup>                                            | 1.032                                                                             |
| Final <i>R</i> indexes<br>[ <i>I</i> ≥ 2 $\sigma$ ( <i>I</i> )]                     | <i>R</i> <sub>1</sub> = 0.0509<br><i>wR</i> <sub>2</sub> = 0.1314                 |
| Final <i>R</i> indexes<br>[all data]                                                | <i>R</i> <sub>1</sub> = 0.0624<br><i>wR</i> <sub>2</sub> = 0.1416                 |
| Largest peak/hole [eÅ <sup>-3</sup> ]                                               | 0.65/-0.51                                                                        |

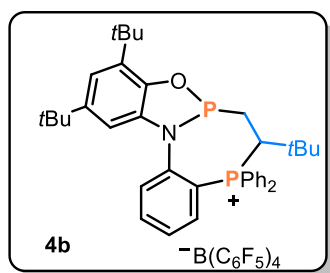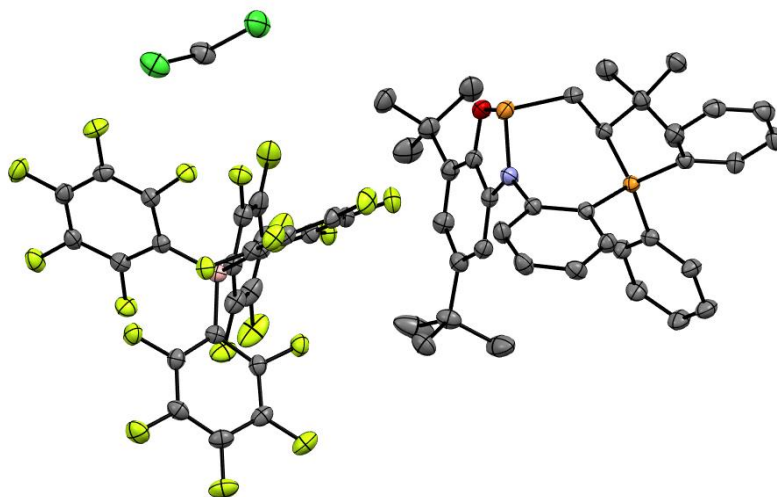

**Figure S99:** Thermal ellipsoid plot of **4b** at 50 % probability. All carbon-based hydrogen atoms were omitted for clarity.

**Table S6.** Crystallographic data and structure refinement for compound **4b**.

|                                                                                     |                                                                                   |
|-------------------------------------------------------------------------------------|-----------------------------------------------------------------------------------|
| CCDC number                                                                         | 2357324                                                                           |
| Empirical formula                                                                   | C <sub>63</sub> H <sub>48</sub> BCl <sub>2</sub> F <sub>20</sub> NOP <sub>2</sub> |
| Formula weight                                                                      | 1358.67                                                                           |
| Temperature [K]                                                                     | 120(2)                                                                            |
| Crystal system                                                                      | monoclinic                                                                        |
| Space group (number)                                                                | <i>Cc</i> (9)                                                                     |
| <i>a</i> [Å]                                                                        | 10.1018(13)                                                                       |
| <i>b</i> [Å]                                                                        | 31.870(6)                                                                         |
| <i>c</i> [Å]                                                                        | 18.321(3)                                                                         |
| $\alpha$ [°]                                                                        | 90                                                                                |
| $\beta$ [°]                                                                         | 92.637(15)                                                                        |
| $\gamma$ [°]                                                                        | 90                                                                                |
| Volume [Å <sup>3</sup> ]                                                            | 5892.2(16)                                                                        |
| <i>Z</i>                                                                            | 4                                                                                 |
| $\rho_{\text{calc}}$ [gcm <sup>-3</sup> ]                                           | 1.532                                                                             |
| $\mu$ [mm <sup>-1</sup> ]                                                           | 0.273                                                                             |
| <i>F</i> (000)                                                                      | 2760                                                                              |
| Crystal size [mm <sup>3</sup> ]                                                     | 0.202×0.192×0.084                                                                 |
| Crystal colour                                                                      | yellow                                                                            |
| Crystal shape                                                                       | block                                                                             |
| Radiation                                                                           | MoK $\alpha$ ( $\lambda$ =0.71073 Å)                                              |
| 2 $\theta$ range [°]                                                                | 4.23 to 66.49 (0.65 Å)                                                            |
| Index ranges                                                                        | -15 ≤ <i>h</i> ≤ 15<br>-48 ≤ <i>k</i> ≤ 48<br>-28 ≤ <i>l</i> ≤ 26                 |
| Reflections collected                                                               | 119817                                                                            |
| Independent reflections                                                             | 19847<br><i>R</i> <sub>int</sub> = 0.0988<br><i>R</i> <sub>sigma</sub> = 0.0719   |
| Completeness to<br>$\theta = 25.242^\circ$                                          | 99.9 %                                                                            |
| Data / Restraints / Parameters                                                      | 19847/24/820                                                                      |
| Absorption correction<br><i>T</i> <sub>min</sub> / <i>T</i> <sub>max</sub> (method) | 0.6951/0.7466<br>(multi-scan)                                                     |
| Goodness-of-fit on <i>F</i> <sup>2</sup>                                            | 1.068                                                                             |
| Final <i>R</i> indexes<br>[ <i>I</i> ≥ 2 $\sigma$ ( <i>I</i> )]                     | <i>R</i> <sub>1</sub> = 0.0422<br><i>wR</i> <sub>2</sub> = 0.0886                 |
| Final <i>R</i> indexes<br>[all data]                                                | <i>R</i> <sub>1</sub> = 0.0812<br><i>wR</i> <sub>2</sub> = 0.1055                 |
| Largest peak/hole [eÅ <sup>-3</sup> ]                                               | 0.55/-0.49                                                                        |
| Flack <i>X</i> parameter                                                            | -0.01(3)                                                                          |



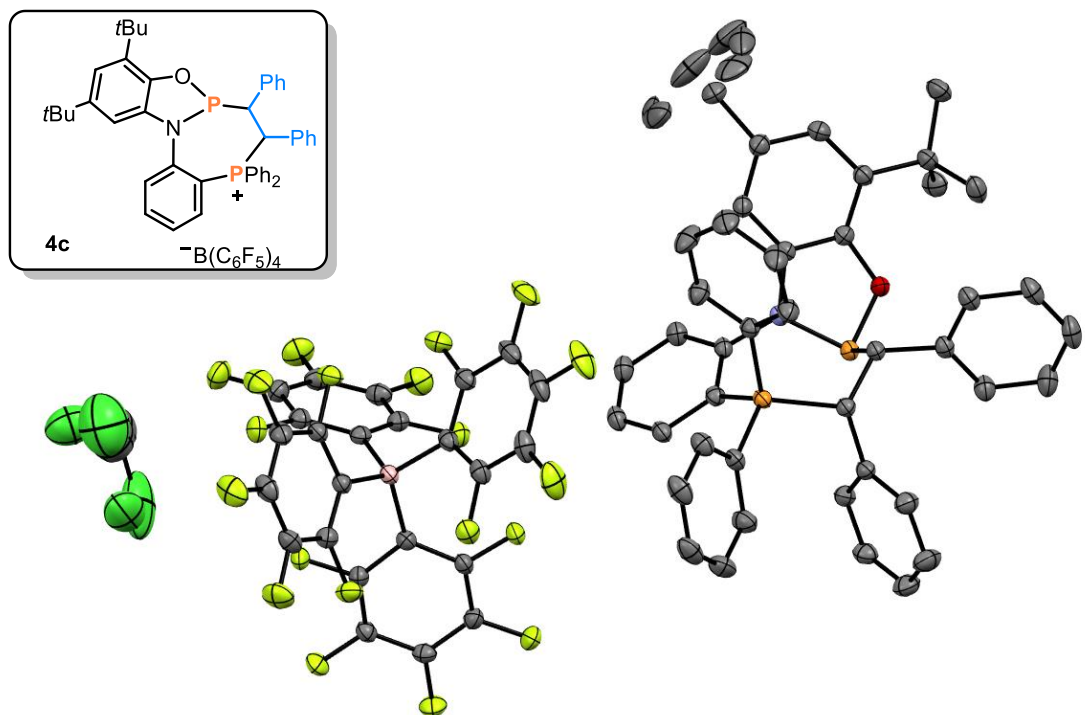

**Figure S100:** Thermal ellipsoid plot of **4c** at 50 % probability. All carbon-based hydrogen atoms were omitted for clarity.

**Table S7.** crystallographic data and structure refinement for compound **4c**.

|                                                                                     |                                                                                   |
|-------------------------------------------------------------------------------------|-----------------------------------------------------------------------------------|
| CCDC number                                                                         | 2357327                                                                           |
| Empirical formula                                                                   | C <sub>71</sub> H <sub>48</sub> BCl <sub>2</sub> F <sub>20</sub> NOP <sub>2</sub> |
| Formula weight                                                                      | 1454.75                                                                           |
| Temperature [K]                                                                     | 120(2)                                                                            |
| Crystal system                                                                      | triclinic                                                                         |
| Space group (number)                                                                | $P\bar{1}$ (2)                                                                    |
| <i>a</i> [Å]                                                                        | 14.195(7)                                                                         |
| <i>b</i> [Å]                                                                        | 15.574(7)                                                                         |
| <i>c</i> [Å]                                                                        | 16.591(8)                                                                         |
| $\alpha$ [°]                                                                        | 82.59(2)                                                                          |
| $\beta$ [°]                                                                         | 77.118(18)                                                                        |
| $\gamma$ [°]                                                                        | 64.527(16)                                                                        |
| Volume [Å <sup>3</sup> ]                                                            | 3226(3)                                                                           |
| <i>Z</i>                                                                            | 2                                                                                 |
| $\rho_{\text{calc}}$ [gcm <sup>-3</sup> ]                                           | 1.498                                                                             |
| $\mu$ [mm <sup>-1</sup> ]                                                           | 0.255                                                                             |
| <i>F</i> (000)                                                                      | 1476                                                                              |
| Crystal size [mm <sup>3</sup> ]                                                     | 0.168×0.105×0.063                                                                 |
| Crystal colour                                                                      | yellow                                                                            |
| Crystal shape                                                                       | block                                                                             |
| Radiation                                                                           | MoK $\alpha$ ( $\lambda$ =0.71073 Å)                                              |
| 2 $\theta$ range [°]                                                                | 3.91 to 60.09 (0.71 Å)                                                            |
| Index ranges                                                                        | -19 ≤ <i>h</i> ≤ 19<br>-21 ≤ <i>k</i> ≤ 21<br>-23 ≤ <i>l</i> ≤ 23                 |
| Reflections collected                                                               | 196656                                                                            |
| Independent reflections                                                             | 18332<br><i>R</i> <sub>int</sub> = 0.0807<br><i>R</i> <sub>sigma</sub> = 0.0384   |
| Completeness to<br>$\theta = 25.242^\circ$                                          | 99.9 %                                                                            |
| Data / Restraints / Parameters                                                      | 18332/179/948                                                                     |
| Absorption correction<br><i>T</i> <sub>min</sub> / <i>T</i> <sub>max</sub> (method) | 0.7005/0.7438<br>(multi-scan)                                                     |
| Goodness-of-fit on <i>F</i> <sup>2</sup>                                            | 1.056                                                                             |
| Final <i>R</i> indexes<br>[ <i>I</i> ≥ 2 $\sigma$ ( <i>I</i> )]                     | <i>R</i> <sub>1</sub> = 0.0494<br><i>wR</i> <sub>2</sub> = 0.1215                 |
| Final <i>R</i> indexes<br>[all data]                                                | <i>R</i> <sub>1</sub> = 0.0700<br><i>wR</i> <sub>2</sub> = 0.1345                 |
| Largest peak/hole [eÅ <sup>-3</sup> ]                                               | 0.76/-1.09                                                                        |

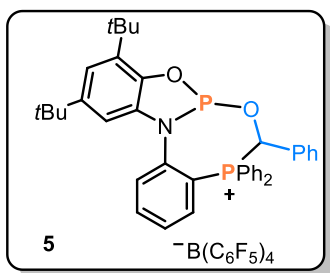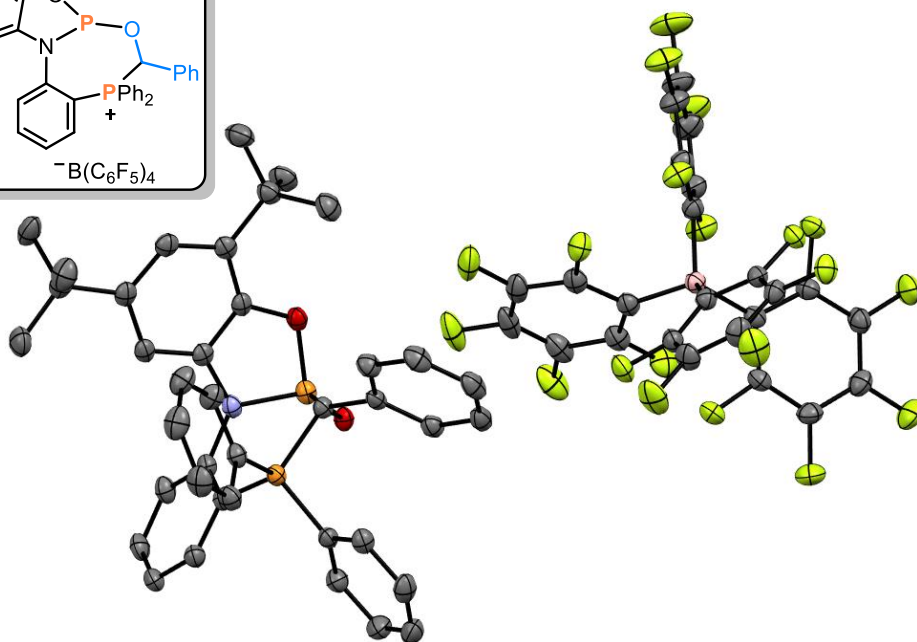

**Figure S101:** Thermal ellipsoid plot of **5** at 50 % probability. All carbon-based hydrogen atoms were omitted for clarity.

**Table S8.** Crystallographic data and structure refinement for compound 5.

|                                                                                     |                                                                                 |
|-------------------------------------------------------------------------------------|---------------------------------------------------------------------------------|
| CCDC number                                                                         | 2357329                                                                         |
| Empirical formula                                                                   | C <sub>63</sub> H <sub>40</sub> BF <sub>20</sub> NO <sub>2</sub> P <sub>2</sub> |
| Formula weight                                                                      | 1295.71                                                                         |
| Temperature [K]                                                                     | 120(2)                                                                          |
| Crystal system                                                                      | monoclinic                                                                      |
| Space group (number)                                                                | <i>P</i> 2 <sub>1</sub> / <i>c</i> (14)                                         |
| <i>a</i> [Å]                                                                        | 11.884(3)                                                                       |
| <i>b</i> [Å]                                                                        | 16.729(4)                                                                       |
| <i>c</i> [Å]                                                                        | 31.882(7)                                                                       |
| $\alpha$ [°]                                                                        | 90                                                                              |
| $\beta$ [°]                                                                         | 96.442(9)                                                                       |
| $\gamma$ [°]                                                                        | 90                                                                              |
| Volume [Å <sup>3</sup> ]                                                            | 6298(3)                                                                         |
| <i>Z</i>                                                                            | 4                                                                               |
| $\rho_{\text{calc}}$ [gcm <sup>-3</sup> ]                                           | 1.366                                                                           |
| $\mu$ [mm <sup>-1</sup> ]                                                           | 0.171                                                                           |
| <i>F</i> (000)                                                                      | 2624                                                                            |
| Crystal size [mm <sup>3</sup> ]                                                     | 0.178×0.144×0.129                                                               |
| Crystal colour                                                                      | colourless                                                                      |
| Crystal shape                                                                       | block                                                                           |
| Radiation                                                                           | MoK $\alpha$ ( $\lambda$ =0.71073 Å)                                            |
| 2 $\theta$ range [°]                                                                | 4.06 to 53.69 (0.79 Å)                                                          |
| Index ranges                                                                        | -15 ≤ <i>h</i> ≤ 15<br>-21 ≤ <i>k</i> ≤ 21<br>-40 ≤ <i>l</i> ≤ 40               |
| Reflections collected                                                               | 284303                                                                          |
| Independent reflections                                                             | 13459<br><i>R</i> <sub>int</sub> = 0.0602<br><i>R</i> <sub>sigma</sub> = 0.0259 |
| Completeness to<br>$\theta = 25.242^\circ$                                          | 99.9 %                                                                          |
| Data / Restraints / Parameters                                                      | 13459/2148/809                                                                  |
| Absorption correction<br><i>T</i> <sub>min</sub> / <i>T</i> <sub>max</sub> (method) | 0.7072/0.7433<br>(multi-scan)                                                   |
| Goodness-of-fit on <i>F</i> <sup>2</sup>                                            | 1.032                                                                           |
| Final <i>R</i> indexes<br>[ <i>I</i> ≥ 2 $\sigma$ ( <i>I</i> )]                     | <i>R</i> <sub>1</sub> = 0.0384<br><i>wR</i> <sub>2</sub> = 0.1020               |
| Final <i>R</i> indexes<br>[all data]                                                | <i>R</i> <sub>1</sub> = 0.0432<br><i>wR</i> <sub>2</sub> = 0.1066               |
| Largest peak/hole [eÅ <sup>-3</sup> ]                                               | 0.74/-0.54                                                                      |

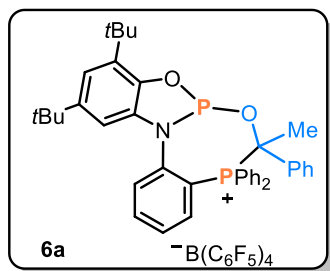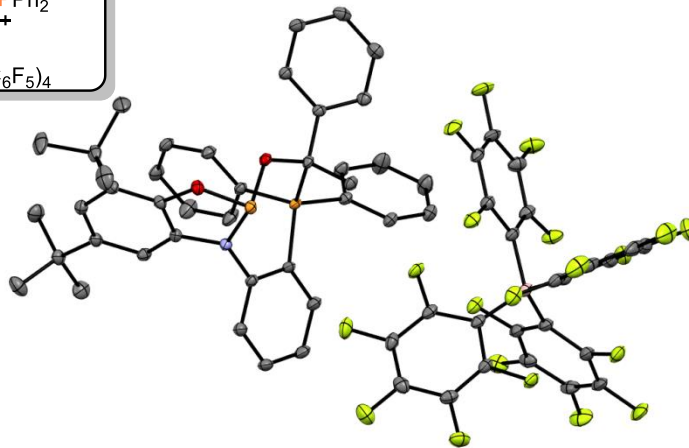

**Figure S102:** Thermal ellipsoid plot of **6a** at 50 % probability. All carbon-based hydrogen atoms were omitted for clarity.

**Table S9.** Crystallographic data and structure refinement for compound **6a**.

|                                                                                     |                                                                                 |
|-------------------------------------------------------------------------------------|---------------------------------------------------------------------------------|
| CCDC number                                                                         | 2357330                                                                         |
| Empirical formula                                                                   | C <sub>64</sub> H <sub>42</sub> BF <sub>20</sub> NO <sub>2</sub> P <sub>2</sub> |
| Formula weight                                                                      | 1309.73                                                                         |
| Temperature [K]                                                                     | 100(2)                                                                          |
| Crystal system                                                                      | monoclinic                                                                      |
| Space group (number)                                                                | <i>C</i> 2/ <i>c</i> (15)                                                       |
| <i>a</i> [Å]                                                                        | 50.046(15)                                                                      |
| <i>b</i> [Å]                                                                        | 10.705(4)                                                                       |
| <i>c</i> [Å]                                                                        | 27.527(8)                                                                       |
| $\alpha$ [°]                                                                        | 90                                                                              |
| $\beta$ [°]                                                                         | 123.266(7)                                                                      |
| $\gamma$ [°]                                                                        | 90                                                                              |
| Volume [Å <sup>3</sup> ]                                                            | 12331(7)                                                                        |
| <i>Z</i>                                                                            | 8                                                                               |
| $\rho_{\text{calc}}$ [gcm <sup>-3</sup> ]                                           | 1.411                                                                           |
| $\mu$ [mm <sup>-1</sup> ]                                                           | 0.175                                                                           |
| <i>F</i> (000)                                                                      | 5312                                                                            |
| Crystal size [mm <sup>3</sup> ]                                                     | 0.352×0.342×0.194                                                               |
| Crystal colour                                                                      | colourless                                                                      |
| Crystal shape                                                                       | block                                                                           |
| Radiation                                                                           | MoK $\alpha$ ( $\lambda$ =0.71073 Å)                                            |
| 2 $\theta$ range [°]                                                                | 3.93 to 58.52 (0.73 Å)                                                          |
| Index ranges                                                                        | -68 ≤ <i>h</i> ≤ 68<br>-14 ≤ <i>k</i> ≤ 14<br>-37 ≤ <i>l</i> ≤ 37               |
| Reflections collected                                                               | 418640                                                                          |
| Independent reflections                                                             | 16732<br><i>R</i> <sub>int</sub> = 0.0795<br><i>R</i> <sub>sigma</sub> = 0.0253 |
| Completeness to<br>$\theta = 25.242^\circ$                                          | 99.9 %                                                                          |
| Data / Restraints / Parameters                                                      | 16732/0/818                                                                     |
| Absorption correction<br><i>T</i> <sub>min</sub> / <i>T</i> <sub>max</sub> (method) | 0.6939/0.7458<br>(multi-scan)                                                   |
| Goodness-of-fit on <i>F</i> <sup>2</sup>                                            | 1.037                                                                           |
| Final <i>R</i> indexes<br>[ <i>I</i> ≥ 2 $\sigma$ ( <i>I</i> )]                     | <i>R</i> <sub>1</sub> = 0.0394<br><i>wR</i> <sub>2</sub> = 0.0989               |
| Final <i>R</i> indexes<br>[all data]                                                | <i>R</i> <sub>1</sub> = 0.0487<br><i>wR</i> <sub>2</sub> = 0.1066               |
| Largest peak/hole [eÅ <sup>-3</sup> ]                                               | 0.50/-0.41                                                                      |

---

## 10. Computational Details

### General Information

All structure optimizations and single point energies were calculated using the Orca 5.0.4 program package.<sup>11,12</sup> For the Coulomb Integral, the RI approximation (RIJCOSX) was applied along with the corresponding auxiliary basis sets.<sup>13-15</sup> Computed molecular structures were visualized with CYLview20.<sup>16</sup>

### Reaction Profiles

The composite method  $r^2$ -SCAN-3c with the implicit solvation accounted for by the CPCM model with dichloromethane as the solvent was applied for structure optimizations.<sup>17</sup> Frequency calculations were carried out in all cases to ensure the correct nature of the stationary points, with zero imaginary frequencies for ground states and one imaginary frequency corresponding to transition states. Thermochemistry data to obtain Gibbs free energies under standard conditions (298.15 K and 1 atm) were obtained using the rigid-rotor harmonic oscillator (RRHO) approximation and the Quasi-RRHO approach by Grimme for low frequencies as implemented in the default settings of Orca 5.0.4.<sup>18</sup> Additional corrections by  $+1.89 \text{ kcal}\cdot\text{mol}^{-1}$  were made to account for the higher reference solution concentration of  $1 \text{ mol}\cdot\text{L}^{-1}$  typically used in solution. The conformational space was searched with the conformer-rotamer ensemble sampling tool (Crest) for the xtb program package and the lowest-energy conformer reoptimized as described above.<sup>19,20</sup> For transition state structures, IRC calculations were conducted when necessary to ensure that they connect to the correct minimum structures. Single point energies were refined at the PW6B95-D4/def2-QZVPP level of theory applying the SMD solvent model using dichloromethane as solvent.<sup>21-23</sup> Natural population analyses were done at the same level of theory using the NBO6 program interfaced with Orca 5.0.4.<sup>24</sup>

## 10.1 Free energy reaction profiles

### 10.1.1. Reaction with diphenylacetylene

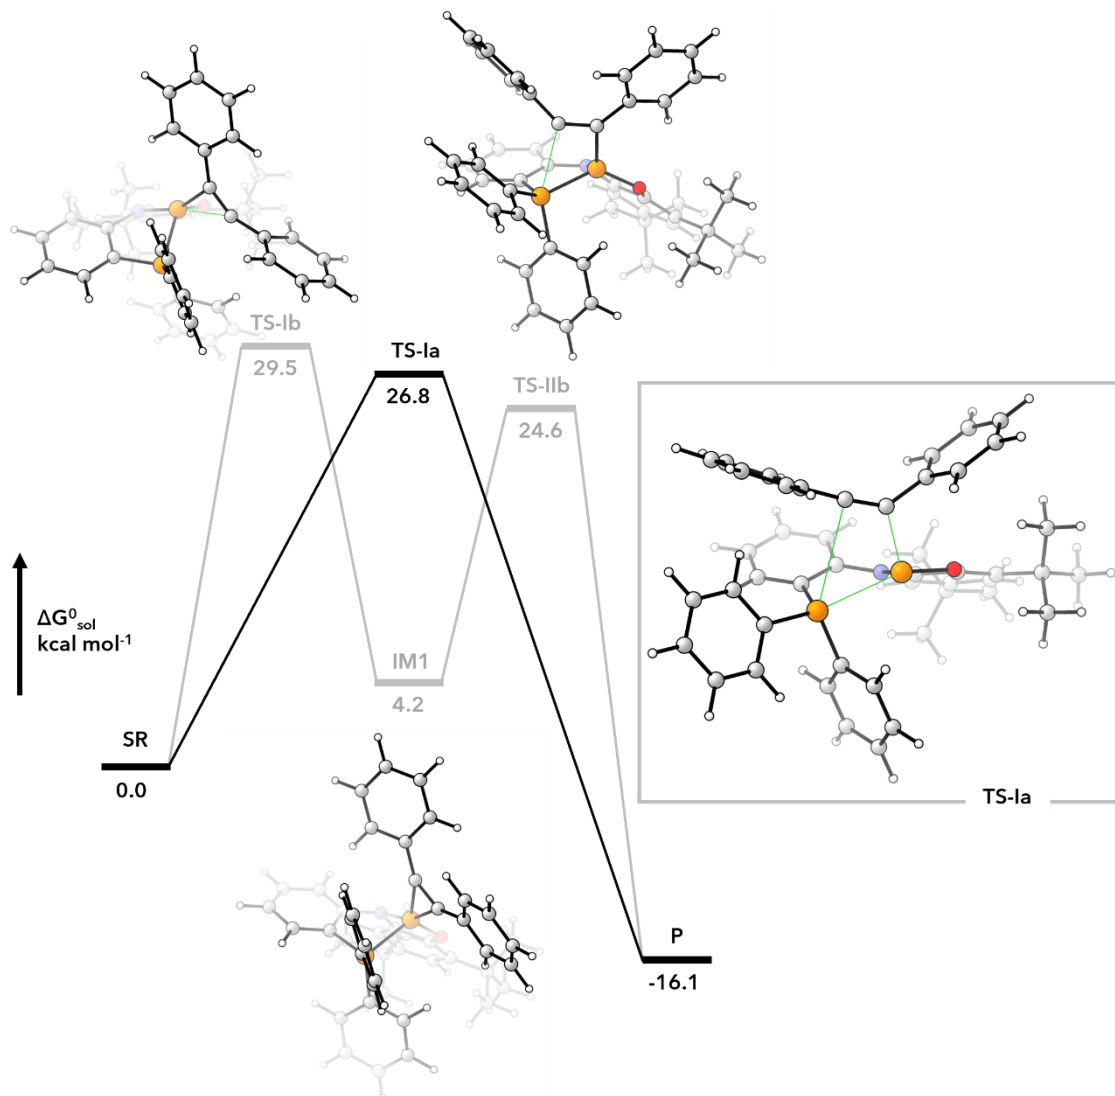

**Figure S103:** Computed free energy profile for the addition of diphenylacetylene to the phosphonium cation **2a** (SR = separated reactants). The path proceeding through the intermediate formation of a phosphirane intermediate is shown in grey.



### 10.1.2. Reaction with styrene

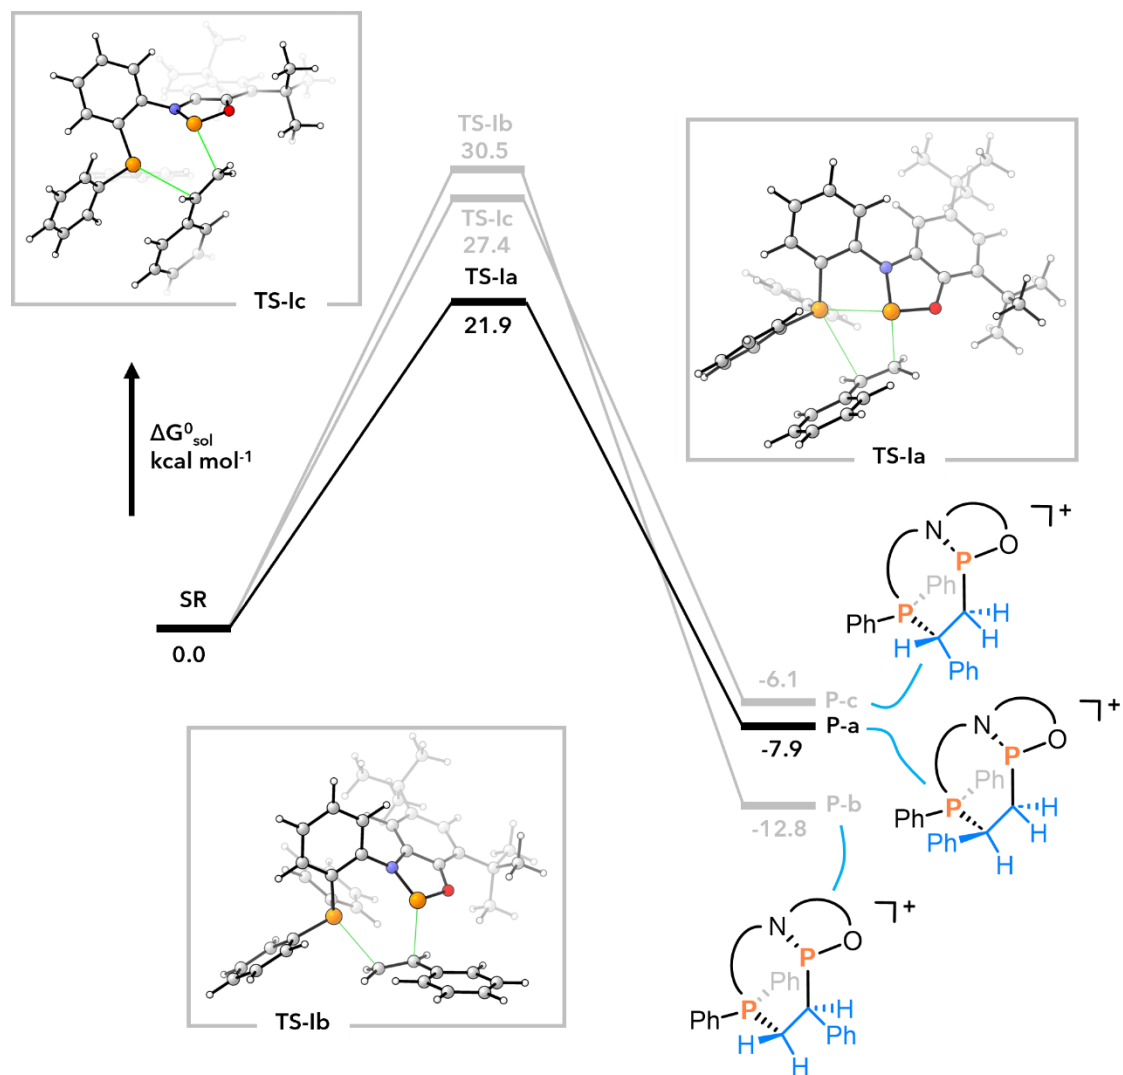

**Figure S104:** Computed free energy profile for the addition of styrene to the phosphonium cation **2a** (SR = separated reactants). The Product P-a was also experimentally identified by SCXRD.

### 10.1.3. Reaction with benzaldehyde

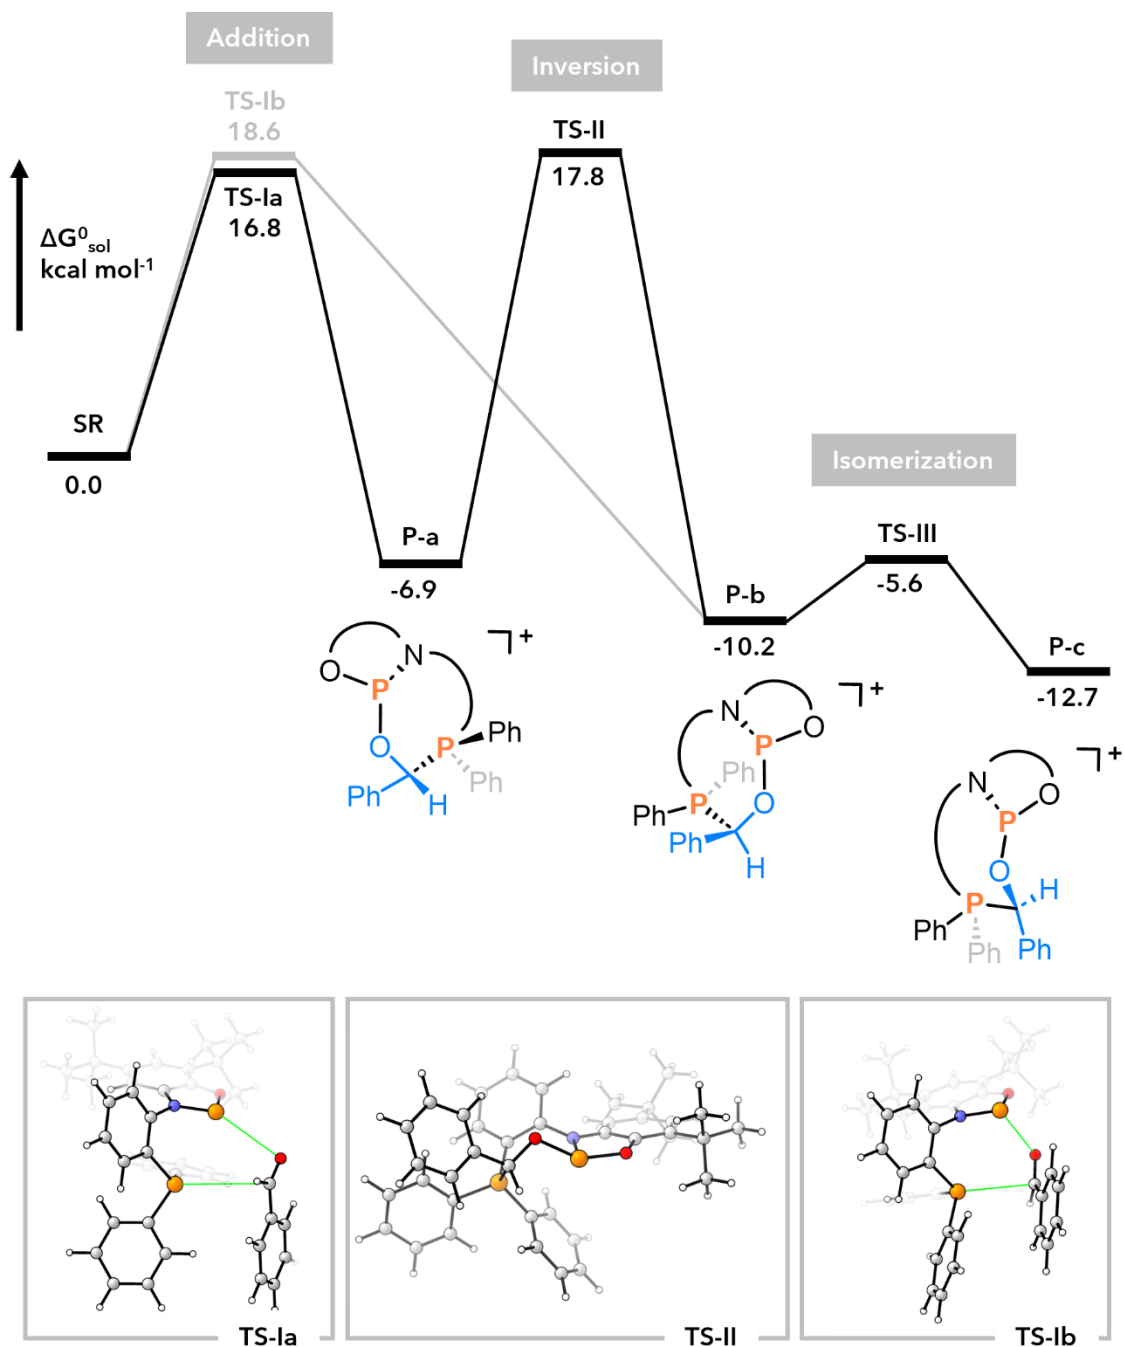

**Figure S105:** Computed free energy profile for the addition of benzaldehyde to the phosphonium cation **2a** (SR = separated reactants). The grey path shows the direct formation of the isomer P-b, which is also accessible by P-edge inversion of P-a. Quick isomerization finally yields the most stable conformer P-c, whose structure was confirmed by SCXRD.

---

## 10.2 xyz coordinates

### Diphenylacetylene

E[a.u.] (r<sup>2</sup>-SCAN-3c-CPCM(CH<sub>2</sub>Cl<sub>2</sub>): -539.3293468

Gibbs free energy correction (kcal mol<sup>-1</sup>): 126.41

E[a.u.] (PW6B95-D4/def2-QZVPP-SMD(CH<sub>2</sub>Cl<sub>2</sub>): -540.44628

|   |                   |                   |                   |
|---|-------------------|-------------------|-------------------|
| C | -4.09268950333864 | 0.61400307262467  | 0.17028432087092  |
| C | -3.12819157906533 | 1.61973487607761  | 0.11168915985341  |
| C | -2.35120203538245 | -1.05792716556168 | 0.21964180258075  |
| C | -1.37097113259031 | -0.04899623064458 | 0.16081720273885  |
| C | -1.77773770048312 | 1.29779259230322  | 0.10689799741027  |
| C | -3.69842298834044 | -0.72270901379227 | 0.22380042277778  |
| H | -4.44642544783722 | -1.50924226936762 | 0.26926768464583  |
| C | 5.28132047903928  | -1.67451842285117 | 0.08723621990764  |
| H | -5.14799846025040 | 0.87103683779475  | 0.17392895652633  |
| H | -3.43096239943958 | 2.66223023440047  | 0.06967996445635  |
| H | -1.02396024636173 | 2.07808225991168  | 0.06164336696344  |
| H | -2.04044885157962 | -2.09756325914089 | 0.26146498594186  |
| C | 2.56057707443106  | -1.00866876689509 | 0.12745547629314  |
| C | 4.31644440006502  | -2.67931947127575 | 0.15493675859324  |
| H | 3.23113248232743  | 1.03937049250117  | 0.02329630968842  |
| C | 3.54119488218172  | -0.00067033217044 | 0.05988207665040  |
| H | 2.21240436497810  | -3.13550962180493 | 0.22767741790598  |
| C | 4.88792863438591  | -0.33730707896176 | 0.04024491336384  |
| H | 5.63623206812493  | 0.44850692022135  | -0.01216262368917 |
| C | 2.96647621000377  | -2.35595801449733 | 0.17520905492068  |
| H | 4.61853803801827  | -3.72219851704934 | 0.19201136001771  |
| H | 6.33624782947520  | -1.93266388298888 | 0.07153323365083  |
| C | 0.00468280029799  | -0.38413466507742 | 0.15625789985003  |
| C | 1.18535108134012  | -0.67227057375580 | 0.14621603808145  |

### Phenylacetylene

E[a.u.] (r<sup>2</sup>-SCAN-3c-CPCM(CH<sub>2</sub>Cl<sub>2</sub>): -308.317334

Gibbs free energy correction (kcal mol<sup>-1</sup>): 72.32

E[a.u.] (PW6B95-D4/def2-QZVPP-SMD(CH<sub>2</sub>Cl<sub>2</sub>): -308.95787

|   |                   |                   |                   |
|---|-------------------|-------------------|-------------------|
| C | -2.34683476676508 | 0.40524644302643  | 0.00363066270354  |
| C | -3.45744254267482 | -0.42888525730602 | 0.00075227778068  |
| C | -3.29735290148897 | -1.81384166511040 | -0.00115163252167 |
| C | -2.01686505053626 | -2.36526854208992 | -0.00016578908561 |
| C | -0.89873140694828 | -1.54133792939232 | 0.00270484007863  |
| C | -1.05325002159324 | -0.14434754411034 | 0.00465229899860  |
| C | 0.08827336370034  | 0.70374151838003  | 0.00764107461923  |

---

|   |                   |                   |                   |
|---|-------------------|-------------------|-------------------|
| C | 1.05986483936931  | 1.42319502893217  | 0.01049676704504  |
| H | 1.91812638731705  | 2.05588400009440  | 0.01310399559611  |
| H | -2.46594424604175 | 1.48447620099246  | 0.00512157691068  |
| H | -4.45365251238863 | 0.00418214975351  | -0.00001405144373 |
| H | -4.16878859498511 | -2.46222261821667 | -0.00340040652544 |
| H | -1.88835724086495 | -3.44393258717496 | -0.00164525765426 |
| H | 0.10072469390038  | -1.96557919777837 | 0.00348364349823  |

### Styrene

E[a.u.] (r<sup>2</sup>-SCAN-3c-CPCM(CH<sub>2</sub>Cl<sub>2</sub>): -309.5674339

Gibbs free energy correction (kcal mol<sup>-1</sup>): 87.46

E[a.u.] (PW6B95-D4/def2-QZVPP-SMD(CH<sub>2</sub>Cl<sub>2</sub>): -310.21135

|   |                   |                   |                   |
|---|-------------------|-------------------|-------------------|
| H | 5.38226055945223  | 0.40149853698804  | -0.69125222886330 |
| C | 4.73594143698589  | -0.39872597875993 | -0.34071400010360 |
| C | 0.38915276539679  | 0.15100991738799  | 0.32518722432125  |
| C | 4.43426931050629  | -2.68147708658597 | 0.36624287853493  |
| C | 3.38217832798745  | -0.15478050805879 | -0.15312622475328 |
| H | 6.33031869844658  | -1.84842841554002 | -0.23076635815222 |
| H | 4.83849098278657  | -3.66914668898494 | 0.57064566710618  |
| C | 5.27028683687239  | -1.66263466517316 | -0.08237234457004 |
| C | 3.07720210254470  | -2.43741765116716 | 0.55455791128806  |
| H | 2.42815111491711  | -3.23675584171876 | 0.90551266749636  |
| H | 2.98819743857536  | 0.83609643326542  | -0.36031694554886 |
| C | 1.08819128812066  | -0.97340463325544 | 0.51562712729473  |
| C | 2.52584449938707  | -1.17263323756290 | 0.29916007023802  |
| H | 0.84253793017468  | 1.07383856800895  | -0.02686461138176 |
| H | -0.67813088322014 | 0.17476223051643  | 0.52180966341505  |
| H | 0.55625759106631  | -1.85660997935974 | 0.87098950367848  |

### Benzaldehyde

E[a.u.] (r<sup>2</sup>-SCAN-3c-CPCM(CH<sub>2</sub>Cl<sub>2</sub>): -345.5053871

Gibbs free energy correction (kcal mol<sup>-1</sup>): 72.51

E[a.u.] (PW6B95-D4/def2-QZVPP-SMD(CH<sub>2</sub>Cl<sub>2</sub>): -346.18817

|   |                  |                   |                   |
|---|------------------|-------------------|-------------------|
| H | 5.55182150325894 | 0.45199990802741  | -0.43930651175742 |
| C | 4.83682897752116 | -0.32079362286404 | -0.17207242342469 |
| O | 0.76633822947759 | 0.47425931234337  | 0.88450171367905  |
| C | 4.32426716811602 | -2.66277806195476 | 0.17855626955343  |
| C | 3.53483945996028 | 0.02127776589503  | 0.15883328583648  |
| H | 6.25329909288419 | -1.92462823580864 | -0.42285135442182 |
| H | 4.63684716744587 | -3.70280637665579 | 0.18433893492583  |
| C | 5.23165257099322 | -1.66174028429012 | -0.16247291104541 |
| C | 3.01758934498739 | -2.32376572128344 | 0.51098702862629  |

---

|   |                  |                   |                  |
|---|------------------|-------------------|------------------|
| H | 2.29888417572088 | -3.09531228274160 | 0.77901522574578 |
| H | 3.20931132269556 | 1.05761655722133  | 0.15705412572621 |
| C | 1.22949725721681 | -0.65481007517618 | 0.85682639966983 |
| C | 2.61820037629207 | -0.98234257032881 | 0.50216549773992 |
| H | 0.59538335342999 | -1.53192631238372 | 1.10964471914651 |

### Phosphenium ion 2a

E[a.u.] (r<sup>2</sup>-SCAN-3c-CPCM(CH<sub>2</sub>Cl<sub>2</sub>): -2052.101666

Gibbs free energy correction (kcal mol<sup>-1</sup>): 383.15

E[a.u.] (PW6B95-D4/def2-QZVPP-SMD(CH<sub>2</sub>Cl<sub>2</sub>): -2055.576132

|   |                   |                   |                   |
|---|-------------------|-------------------|-------------------|
| C | -3.30937728938862 | -0.89423260783197 | -0.11533851397494 |
| C | -2.19221482331003 | -1.52915912737892 | 0.42793990768086  |
| H | 3.24811886970107  | -2.35403968872777 | -1.18743527958990 |
| C | -1.27763951849136 | -0.75668404802678 | 1.12804569495094  |
| H | -2.01723498066338 | -2.59126782243696 | 0.30557495134342  |
| C | -2.57243952914629 | 1.28939607606370  | 0.79305103319888  |
| C | -2.78341923648866 | 2.78670768714032  | 1.01589007444881  |
| C | -4.36376741185921 | -1.66259357290720 | -0.91556378480421 |
| C | -3.47325416485377 | 0.48640975534871  | 0.08473116471436  |
| H | -4.35202559445645 | 0.96101039768697  | -0.33358629690574 |
| N | -0.08288276356389 | -1.21707382187846 | 1.75550830706352  |
| C | -1.46266094917348 | 0.61018264077572  | 1.28973838753350  |
| O | -0.42552360061693 | 1.20696444480675  | 2.02271623066834  |
| C | 1.69035278108865  | -1.77131899430422 | 0.18651460150076  |
| C | 1.16099059346971  | 2.08428580816968  | -1.57557435803080 |
| P | 0.83762122828980  | 0.17690572399614  | 2.24999756074055  |
| P | 1.90140576864828  | 0.02265521635587  | 0.11209121095013  |
| C | -0.40433181006685 | 1.84974949427175  | -3.39571142040183 |
| C | 1.02769977770276  | 0.71609427457828  | -1.30330280458987 |
| H | 1.81589132368912  | 2.70742282772794  | -0.97189016722532 |
| C | 4.41998031686853  | 0.33199288031205  | 1.21757000592367  |
| C | 3.65383165962689  | 0.44446962942816  | 0.04995633144494  |
| H | 3.66004485630209  | 0.92417946544778  | -2.06119747800414 |
| C | 5.77813060259928  | 0.62189689597677  | 1.17572277314909  |
| C | 0.16814587688384  | -0.08151057344534 | -2.06683908945177 |
| C | -0.54447565396832 | 0.49246474095981  | -3.11312249071413 |
| H | 0.55413354900590  | 3.70060695185842  | -2.84654475773826 |
| C | 0.44887084701960  | 2.64180065921635  | -2.62962399450653 |
| H | -0.96355438580744 | 2.29253843471749  | -4.21478452899976 |
| H | 0.05619300886609  | -1.13971121863291 | -1.84838824772069 |
| H | -1.20740540171470 | -0.12488107701002 | -3.71153711353431 |
| C | 4.24889835964933  | 0.84297335725027  | -1.15265352964644 |
| C | 6.37207455256556  | 1.02383394164093  | -0.01943340237871 |

|   |                   |                   |                   |
|---|-------------------|-------------------|-------------------|
| H | -5.67999809348894 | -1.93520520082729 | 0.80448038484941  |
| C | 5.60922883632933  | 1.13138547189760  | -1.17945586572122 |
| H | 6.37268081923794  | 0.53789790418850  | 2.08033958427803  |
| C | 1.24704120911653  | -4.48595116886153 | 0.55379319587208  |
| C | 2.23531299519456  | -4.05365519653809 | -0.32924623822364 |
| C | 2.46789186870719  | -2.69424768660265 | -0.51188700926735 |
| H | 2.83581767612462  | -4.77887427907218 | -0.86941110787117 |
| C | 0.69439460250380  | -2.21476182555716 | 1.07716831287531  |
| H | 3.96544332055478  | 0.01730253772223  | 2.15310197312925  |
| H | 1.08092929629865  | -5.54926819158299 | 0.69845047337956  |
| C | 0.47708866883468  | -3.57130852023039 | 1.26952473387463  |
| H | -0.28225793439608 | -3.90127649443199 | 1.97164005022203  |
| H | -4.09736211312438 | 3.12867859783717  | -0.70370677315401 |
| H | -4.96506747805036 | 2.77421227058019  | 0.81027764482333  |
| H | -4.19407035698445 | 4.34958488282139  | 0.57346932553374  |
| H | -3.07163191430029 | -3.31049234730277 | -1.55400618744037 |
| H | -3.97745901872324 | -3.64005004353821 | -0.05775493649368 |
| H | -4.80683885946728 | -3.65191126335167 | -1.62057957402550 |
| C | -4.09103855102168 | 3.27664762647144  | 0.38179678558214  |
| H | -1.91912076726334 | 2.81078766087003  | 3.03747491326000  |
| H | -3.03725235702067 | 4.14039056145774  | 2.69118473187216  |
| C | -2.85064657767891 | 3.07274302810162  | 2.52982074061514  |
| H | -3.66805484218536 | 2.50799279374670  | 2.99146271776860  |
| H | -1.78151082050084 | 4.64974703792628  | 0.54037711894909  |
| C | -1.62342138680453 | 3.57701462627522  | 0.38122827123092  |
| H | -0.65659298577979 | 3.30698565936790  | 0.81364637098329  |
| H | -1.58025959978715 | 3.39133244467715  | -0.69710735673896 |
| C | -4.02562771853012 | -3.15288881061538 | -1.03809174933622 |
| H | -4.74381718015503 | -0.01393952403507 | -2.31545413215931 |
| H | -3.49314397801489 | -1.15318598190732 | -2.85039054059346 |
| C | -4.45646168902741 | -1.06987015111304 | -2.33474610048028 |
| H | -5.20791779018125 | -1.61492455718046 | -2.91735325007766 |
| H | -6.05561001637197 | -0.48897749757764 | -0.15226575105199 |
| C | -5.72924180711371 | -1.53185130943514 | -0.21310192859723 |
| H | -6.48893211234183 | -2.09191599327626 | -0.77013556395152 |
| H | 6.07232415805809  | 1.43939101449521  | -2.11208738116020 |
| H | 7.43335488194623  | 1.25357864045150  | -0.04589701784933 |

**Phosphenium ion 2a + Diphenylacetylene TS-1a**

E[a.u.] (r<sup>2</sup>-SCAN-3c-CPCM(CH<sub>2</sub>Cl<sub>2</sub>): -2591.423254

Gibbs free energy correction (kcal mol<sup>-1</sup>): 510.5

E[a.u.] (PW6B95-D4/def2-QZVPP-SMD(CH<sub>2</sub>Cl<sub>2</sub>): -2596.001348

|   |                   |                  |                   |
|---|-------------------|------------------|-------------------|
| C | -4.38166350760615 | 0.43561368961320 | -0.38505032962151 |
|---|-------------------|------------------|-------------------|

|   |                   |                    |                   |
|---|-------------------|--------------------|-------------------|
| C | -4.91244315996142 | -0.82592739530052  | -0.10405753101026 |
| H | -5.51399803799145 | -3.98189477800247  | -4.44535365993947 |
| C | -4.06343144893214 | -1.80961892755774  | 0.38387209607119  |
| H | -6.37583584567817 | -1.80789534487674  | 1.83479962753707  |
| C | -2.11843924113075 | -0.32308724718676  | 0.25606947272594  |
| C | -0.61632317561548 | -0.08038093422503  | 0.39694664846609  |
| C | -5.32075177636717 | 1.52442266115811   | -0.91275850318230 |
| C | -3.01201026276838 | 0.66083875013424   | -0.18845113937560 |
| H | -5.95995018708936 | -1.04169810978602  | -0.27683597353209 |
| N | -4.36722808500495 | -3.14682894346983  | 0.68901687793615  |
| C | -2.69736542239722 | -1.55702636838865  | 0.53739158809868  |
| O | -2.00452704483473 | -2.68790255663882  | 0.90962850776888  |
| C | -6.03124534855224 | -4.92989364426140  | 0.50738532594081  |
| C | -5.15835118425790 | -4.86210802900521  | -2.51829685043467 |
| P | -2.92941649357091 | -4.08151517377920  | 1.02337711351173  |
| P | -4.63902815206715 | -5.99823162488090  | 0.02067109948843  |
| C | -3.47404560596552 | -4.64219362870402  | -4.23425462562552 |
| C | -4.21904687143632 | -5.46444571939507  | -1.67684448710437 |
| H | -1.51481002467926 | -5.38951437122662  | -3.73750447755405 |
| C | -5.09952978676931 | -8.42353642287508  | -1.32217253522241 |
| C | -5.28978316875006 | -7.69563274670158  | -0.14134385699503 |
| H | -6.77571910540268 | -10.10948088143883 | 1.73833518729050  |
| C | -5.51735147857382 | -9.74928348424993  | -1.39723079422545 |
| C | -2.90311961286522 | -5.64603115483003  | -2.11727955415205 |
| C | -2.53582315712560 | -5.24233062760714  | -3.39759853036864 |
| H | -3.18457527357745 | -4.31914337496863  | -5.23028445265255 |
| C | -4.78260545228011 | -4.45164134655685  | -3.79389422017611 |
| H | -6.17948110903637 | -4.71196037619192  | -2.17766632721927 |
| H | -6.03944004466909 | -7.77261410092761  | 1.88689558149680  |
| H | -2.16746483653810 | -6.10645487965850  | -1.46110556845988 |
| C | -5.88565433145091 | -8.32019618905190  | 0.96348316905496  |
| C | -6.12027507733882 | -10.36153330588263 | -0.30146285653133 |
| H | -5.16734721299513 | 0.85930126576673   | -2.98656749297595 |
| C | -6.30535116024581 | -9.64188541600778  | 0.87763852396728  |
| H | -4.63378723604735 | -7.95769663843329  | -2.18539085730106 |
| C | -7.95379211594319 | -3.25653110304711  | 1.65135127345271  |
| C | -8.30689609023964 | -4.53448494335265  | 1.23276827668965  |
| C | -7.34194545991189 | -5.37049276992630  | 0.67496479150065  |
| H | -8.68786823203149 | -2.61089854905603  | 2.12395609876753  |
| C | -5.69428052775939 | -3.61551421181554  | 0.88422358374142  |
| H | -8.13958496596053 | -6.79373017121863  | 4.52778866162594  |
| H | -7.61106520814366 | -6.37864238674908  | 0.37485533655168  |
| C | -6.65138354096584 | -2.79600299373551  | 1.48248059309958  |
| H | -9.32429136479783 | -4.89251539561037  | 1.35699790182678  |

|   |                   |                    |                   |
|---|-------------------|--------------------|-------------------|
| H | -0.47957280716064 | 1.61924489496296   | -0.98163743436169 |
| H | -0.73712692813620 | 2.08361576842157   | 0.71774726307185  |
| H | 0.84230146002398  | 1.48700047815544   | 0.18671701718454  |
| H | -4.15000603034184 | 3.25205983243288   | -0.24881058323828 |
| H | -3.80993784340667 | 2.74816638624534   | -1.92133774511068 |
| H | -5.31841793513943 | 3.58768036909456   | -1.53487999058493 |
| C | -0.23808660579463 | 1.36656890512209   | 0.05659874240863  |
| H | -0.39229144963652 | -1.38531058720417  | 2.15236864920339  |
| H | 0.89617293222153  | -0.18460593032334  | 1.94913779544088  |
| C | -0.18158211336100 | -0.35723412522632  | 1.84854764929195  |
| H | -0.70256664603580 | 0.31399506410438   | 2.53961224609617  |
| H | 1.22003382415936  | -0.81326292193002  | -0.49578977795525 |
| C | 0.14467018053688  | -1.01123502737221  | -0.56939837664781 |
| H | -0.02401784237357 | -2.06570773028444  | -0.33819753556635 |
| H | -0.16763402795422 | -0.82823007418314  | -1.60356726028086 |
| C | -4.59650813128692 | 2.85181228901999   | -1.16581059646064 |
| H | -7.03353986464606 | 0.87073503736523   | 0.29629112577216  |
| H | -6.01512400294081 | 2.09690354215188   | 1.07658779506453  |
| C | -6.43833775207261 | 1.77257440365251   | 0.11928164971673  |
| H | -7.11309858085516 | 2.55644227017090   | -0.24320500171787 |
| H | -6.53276862776856 | 0.13903806545145   | -2.11112893423533 |
| C | -5.94604990474054 | 1.05404443154055   | -2.24077295415925 |
| H | -6.61342398693687 | 1.82987058016742   | -2.63303817651740 |
| H | -6.44522193637481 | -11.39604392865868 | -0.36552143869699 |
| H | -5.37221318251919 | -10.30300686491055 | -2.32044414924367 |
| C | -3.23833814702066 | -4.31176737307475  | 3.02346214380347  |
| C | -4.01425323099107 | -5.25456194977448  | 3.33106645975442  |
| C | -2.53501086673806 | -3.25754133539578  | 3.78024477910207  |
| C | -4.86506437359636 | -6.26290934124899  | 3.75156525217742  |
| C | -6.56516564621790 | -8.25822347218016  | 4.69894578527983  |
| C | -6.24726444627799 | -5.99623617929353  | 3.92733140016795  |
| C | -4.35159622724087 | -7.54870577849782  | 4.05988871504770  |
| H | -4.81326495779833 | -9.51326416903705  | 4.77113619201779  |
| H | -6.63100789999998 | -5.00867350830338  | 3.69184176770517  |
| C | -7.08076623483499 | -6.99485488533510  | 4.39586646548238  |
| C | -5.20383598336219 | -8.52839054503168  | 4.53408860068932  |
| H | -3.29388778532741 | -7.74531520755570  | 3.91774472455819  |
| H | -4.19903116849932 | -1.89285200426791  | 3.67116775967777  |
| H | -7.22809703482502 | -9.03659378146374  | 5.06513954335815  |
| C | -1.23906431715098 | -1.27089190218475  | 5.23084245813917  |
| C | -1.22915756920649 | -3.46717090013440  | 4.22662624868627  |
| H | -0.72741813747335 | -4.40590454095591  | 4.01027251830831  |
| C | -3.18631775315964 | -2.04753893047457  | 4.03344735752751  |
| H | 0.42220780870179  | -2.63967830916326  | 5.31929693103717  |



---

|   |                   |                   |                   |
|---|-------------------|-------------------|-------------------|
| C | -0.58914237614465 | -2.47243409830293 | 4.95991093086758  |
| C | -2.53405089930271 | -1.05920021279992 | 4.76358083236845  |
| H | -3.04245036121719 | -0.12122008641979 | 4.96769967259128  |
| H | -0.73382814902283 | -0.49653685501328 | 5.80084011821982  |
| H | -2.61281501542738 | 1.63971713784836  | -0.41289034799193 |

**Phosphenium ion 2a + Diphenylacetylene TS-Ib**

E[a.u.] (r<sup>2</sup>-SCAN-3c-CPCM(CH<sub>2</sub>Cl<sub>2</sub>): -2591.412016

Gibbs free energy correction (kcal mol<sup>-1</sup>): 510.37

E[a.u.] (PW6B95-D4/def2-QZVPP-SMD(CH<sub>2</sub>Cl<sub>2</sub>): -2595.997763

|   |                   |                   |                   |
|---|-------------------|-------------------|-------------------|
| C | -4.61170154294540 | 0.26715017702895  | -0.17209584268343 |
| C | -3.58810236751481 | 1.18125929326642  | -0.43351077722896 |
| H | 0.51797364328639  | -2.51076271715642 | 3.90627372496316  |
| C | -2.31871907842723 | 0.68860047238950  | -0.70490855833543 |
| H | -2.34558871319484 | 3.76786900977714  | -1.59000799583013 |
| C | -3.04335354950202 | -1.62913116238971 | -0.43062649068206 |
| C | -2.73109345039986 | -3.12344944473893 | -0.35267182431311 |
| C | -6.04183308187945 | 0.72287077893967  | 0.13214003098628  |
| C | -4.31912883897537 | -1.10418113542876 | -0.18520402744107 |
| H | -3.76292654712094 | 2.24947935682428  | -0.42072828250769 |
| N | -1.13651592330799 | 1.40537704655760  | -0.94911939065807 |
| C | -2.06218412619591 | -0.67912635967140 | -0.69940390568636 |
| O | -0.72531862482881 | -0.98940205358956 | -0.94074937360489 |
| C | 0.20421640331799  | 2.80850201741844  | 0.46012079613796  |
| C | 0.78911521473673  | -0.84842870636302 | 2.58231947559089  |
| P | 0.28489772460768  | 0.32280084381428  | -1.05868479130520 |
| P | 1.05040152011559  | 1.25162015546966  | 0.78142916861242  |
| C | -1.02109106409892 | -1.02253670708535 | 4.16717545042100  |
| C | 0.29147543748323  | 0.39807870936478  | 2.17720791294850  |
| H | -2.41905241059004 | 0.61670582848196  | 4.20424239361400  |
| C | 3.54601113389053  | 1.92862673236943  | -0.17217005068931 |
| C | 2.82132825323404  | 1.47293603533941  | 0.93821305996775  |
| H | 5.33834322268474  | 1.19038564132909  | 3.19097511961962  |
| C | 4.91856629010305  | 2.1000006309562   | -0.06118098960138 |
| C | -0.86719511264675 | 0.92710344940584  | 2.75562193224759  |
| C | -1.51951774926125 | 0.20957512595154  | 3.75279626640500  |
| H | -1.53553948886821 | -1.58004600007456 | 4.94461362920047  |
| C | 0.13281502923943  | -1.54721251494142 | 3.58612672583224  |
| H | 1.67586278377320  | -1.27156700750078 | 2.11903667316805  |
| H | 2.89793645211362  | 0.86862393520037  | 3.01667712491212  |
| H | -1.25881178641324 | 1.88715572358924  | 2.43150740421554  |
| C | 3.46117855874784  | 1.20856320903647  | 2.15333975517472  |
| C | 5.56395829347887  | 1.82887313221142  | 1.14598662160191  |

|   |                   |                   |                   |
|---|-------------------|-------------------|-------------------|
| H | -8.02654681185298 | 0.45813011925463  | -0.71425615140081 |
| C | 4.83679529352735  | 1.39249409796201  | 2.24953397740837  |
| H | 3.04406126661347  | 2.14424700756817  | -1.11195626626441 |
| C | -1.18537023385815 | 5.07157949752563  | -0.31717802317262 |
| C | -0.12353134090588 | 5.18219673310224  | 0.58125737260176  |
| C | 0.58815176766183  | 4.05032263016757  | 0.96326445830794  |
| H | -1.72891305918363 | 5.96219392829910  | -0.61875353489276 |
| C | -0.86525500536592 | 2.69612892970073  | -0.45600363776488 |
| H | 5.51805698566768  | -2.61076658222065 | 1.71965507701445  |
| H | 1.42379847570982  | 4.12807458404934  | 1.65352512672044  |
| C | -1.54877277083418 | 3.84043267850789  | -0.85664693904482 |
| H | 0.15370314914523  | 6.15321062117987  | 0.97907426762971  |
| H | -4.48389784011213 | -3.70925794697703 | 0.82735856352744  |
| H | -4.71967370136765 | -3.83609236584954 | -0.93252142980075 |
| H | -3.71439872300084 | -5.01819687738940 | -0.07877398486088 |
| H | -5.93481327187153 | 2.66206314427052  | -0.87925869945818 |
| H | -7.22114263923563 | 2.51853397481554  | 0.32733921180061  |
| H | -5.54574719596717 | 2.72932020351820  | 0.85590840229990  |
| C | -3.99524569200331 | -3.96067251733505 | -0.11995882863557 |
| H | -1.12564314115634 | -3.11522748518336 | -1.85767107164264 |
| H | -1.90191971004732 | -4.68654599376981 | -1.60519042685422 |
| C | -2.08145308795104 | -3.60708358352450 | -1.66425533479849 |
| H | -2.74668583454791 | -3.41744232377404 | -2.51407697961327 |
| H | -0.85374964738119 | -2.78370347360370 | 0.73835749665062  |
| C | -1.77621372156940 | -3.36203767025570 | 0.83440199076120  |
| H | -2.25970002544470 | -3.07539955114256 | 1.77519639877062  |
| H | -1.51077194782632 | -4.42437821379562 | 0.89221780326442  |
| C | -6.18339767895545 | 2.24934131121631  | 0.10494231987025  |
| H | -6.42537793604091 | -0.86681540091291 | 1.59689223548722  |
| H | -5.76845108336922 | 0.62603858769961  | 2.29570955973347  |
| C | -6.44668076017422 | 0.22562111030833  | 1.53355567068645  |
| H | -7.46439816910931 | 0.55836297457616  | 1.76815093703825  |
| H | -6.72547648552922 | 0.46475487270473  | -1.92467948150643 |
| C | -7.00077638657607 | 0.13011001718306  | -0.91827378009570 |
| H | -6.98715100669641 | -0.96417617163991 | -0.90609488755260 |
| H | 6.63877023600928  | 1.96359093307475  | 1.22529936288257  |
| H | 5.48654111450849  | 2.44632231626984  | -0.91916489552377 |
| C | 1.72804211182595  | -0.49428384140179 | -1.94653322819920 |
| C | 2.02957711709751  | -1.13865602272113 | -0.88207223076026 |
| C | 2.06308822721216  | -0.29081523229717 | -3.34874807538751 |
| C | 2.68953282166715  | -2.13263068832172 | -0.11500082075126 |
| C | 3.93382833547973  | -4.05676390396171 | 1.50516269457013  |
| C | 3.94079468634651  | -1.86706589390234 | 0.47839800564791  |
| C | 2.07633969652623  | -3.38169999281625 | 0.11153092992145  |

|   |                   |                   |                   |
|---|-------------------|-------------------|-------------------|
| H | 2.21557167363412  | -5.28638911299637 | 1.07807278097336  |
| H | 4.42354821613513  | -0.91057029888727 | 0.30355979436883  |
| C | 4.55027627538719  | -2.82706260640515 | 1.27478809583024  |
| C | 2.69940788447034  | -4.32729101988326 | 0.91413953277088  |
| H | 1.11586858149840  | -3.59469637003985 | -0.34733709793975 |
| H | 0.54984207538754  | 1.19786201818540  | -3.72673316453169 |
| H | 4.41383121665169  | -4.80000839548322 | 2.13468990475057  |
| C | 2.78122354807459  | 0.05419747450765  | -6.02157519793375 |
| C | 3.12559503708839  | -1.02870225385847 | -3.89166922443816 |
| H | 3.66439157358814  | -1.73302233375858 | -3.26336699243538 |
| C | 1.36812166521694  | 0.61842241859431  | -4.14968261475823 |
| H | 4.30371963480478  | -1.42318468555529 | -5.63945047779341 |
| C | 3.47933857921170  | -0.85192008333861 | -5.22224520478407 |
| C | 1.72662945150422  | 0.78748894182528  | -5.48264118693042 |
| H | 1.18221252884354  | 1.49484513074191  | -6.10131527248987 |
| H | 3.06151290350637  | 0.18879752103696  | -7.06226386819784 |
| H | -5.12381672670936 | -1.79988681276501 | 0.01744407387229  |

#### Phosphenium ion 2a + Diphenylacetylene IM-I

E[a.u.] (r<sup>2</sup>-SCAN-3c-CPCM(CH<sub>2</sub>Cl<sub>2</sub>): -2591.448668

Gibbs free energy correction (kcal mol<sup>-1</sup>): 511.94

E[a.u.] (PW6B95-D4/def2-QZVPP-SMD(CH<sub>2</sub>Cl<sub>2</sub>): -2596.040673

|   |                   |                   |                   |
|---|-------------------|-------------------|-------------------|
| C | -4.61709928152018 | 0.04881370769184  | -0.31490305880158 |
| C | -3.51556444430700 | 0.85863713227319  | -0.60314982851321 |
| H | -0.62760688551789 | -2.15543297883415 | 4.41220127025463  |
| C | -2.25736663265922 | 0.27121593175491  | -0.66684800429343 |
| H | -2.07097086998051 | 3.05933080050807  | -2.15643593477291 |
| C | -3.15877638287567 | -1.93844095760769 | -0.12894813322746 |
| C | -2.95671223873591 | -3.42832577024142 | 0.15307174587674  |
| C | -6.03718808906998 | 0.61758741739652  | -0.23167359987755 |
| C | -4.41713788893071 | -1.32180985384226 | -0.09782936045149 |
| H | -3.62432329895065 | 1.92259406986339  | -0.77161736375282 |
| N | -1.02253590466932 | 0.87461489873980  | -0.93316744415150 |
| C | -2.09514104273596 | -1.09014690796184 | -0.41951802214840 |
| O | -0.76220775838192 | -1.49013861762814 | -0.44646066620360 |
| C | 0.25108830413772  | 2.52457188664030  | 0.27922267072533  |
| C | 0.07284669461327  | -0.74336894408016 | 2.95787559419462  |
| P | 0.35418725202870  | -0.27921499643979 | -0.66286755021990 |
| P | 0.93592017566728  | 1.05949725794146  | 1.04760023579381  |
| C | -1.42247530162342 | -0.18215922441912 | 4.76338071915989  |
| C | 0.03321224684940  | 0.59064704632214  | 2.53302225150233  |
| H | -2.07158323920985 | 1.86998379437829  | 4.86224898068559  |
| C | 3.49103925136690  | 1.70004106981555  | 0.24308782861216  |

|   |                   |                   |                   |
|---|-------------------|-------------------|-------------------|
| C | 2.71494388756721  | 1.12592419756681  | 1.26006630104790  |
| H | 5.18503597711780  | -0.06848206599968 | 3.25346383894508  |
| C | 4.87548335121802  | 1.62773908446316  | 0.32089654645425  |
| C | -0.74271060810971 | 1.53583835691168  | 3.21129757517103  |
| C | -1.46717900280265 | 1.14145566925326  | 4.33048238256829  |
| H | -1.99512798559983 | -0.48464825847058 | 5.63537033306493  |
| C | -0.65373968609494 | -1.12216273177596 | 4.07974034302727  |
| H | 0.66075549381475  | -1.48065725975553 | 2.41604852289503  |
| H | 2.72242909196999  | 0.04629793603652  | 3.13712039747095  |
| H | -0.78480549533209 | 2.56532630940910  | 2.86732045080182  |
| C | 3.32244035436951  | 0.48821662551873  | 2.34718384829616  |
| C | 5.48454249189300  | 0.98598962991116  | 1.39861032804429  |
| H | -7.94281512948211 | 0.33594391445801  | -1.24081064915414 |
| C | 4.70992208215351  | 0.42380096086721  | 2.41040984136067  |
| H | 3.01950162553488  | 2.19608724063930  | -0.60106797466414 |
| C | -0.96371330543189 | 4.58555348684850  | -1.10783333312518 |
| C | 0.02622705781323  | 4.87282898035009  | -0.16642252746794 |
| C | 0.64703489984986  | 3.83954271141781  | 0.52429609031759  |
| H | -1.43894384127044 | 5.39692636124983  | -1.65160162851912 |
| C | -0.73981826257271 | 2.22622906448447  | -0.68615159414436 |
| H | 6.12418180811311  | -2.90932943869130 | -0.93178309043426 |
| H | 1.42346621593499  | 4.04980462337897  | 1.25477213272888  |
| C | -1.33776251301529 | 3.27492060657783  | -1.38564000542563 |
| H | 0.31571379931284  | 5.90126790838445  | 0.02424350261523  |
| H | -4.80972884305649 | -3.74711944891466 | 1.28060892064655  |
| H | -4.95619635973411 | -4.08062791012566 | -0.46147703366953 |
| H | -4.08691922231561 | -5.20747464990006 | 0.59130592167462  |
| H | -5.70605338810550 | 2.38227399158640  | -1.48523147478851 |
| H | -7.10869772141991 | 2.48151679501215  | -0.41110033209891 |
| H | -5.48078108670923 | 2.67886439342895  | 0.25466472447529  |
| C | -4.28832663113182 | -4.14753867103033 | 0.40437061382068  |
| H | -1.28650147411305 | -3.68291910176160 | -1.25298989463938 |
| H | -2.16033029434491 | -5.17406737519644 | -0.86090612757074 |
| C | -2.27625962395879 | -4.10169738754832 | -1.05543117664170 |
| H | -2.88915673404149 | -3.98160702579434 | -1.95571961052817 |
| H | -1.09202725208070 | -3.15447002960212 | 1.28055427557876  |
| C | -2.08188947231236 | -3.59887327663489 | 1.41116599958053  |
| H | -2.55975648281631 | -3.12620256680284 | 2.27667193508946  |
| H | -1.95293444366743 | -4.66549126138844 | 1.62890053671214  |
| C | -6.07442138258207 | 2.12940013192210  | -0.48465096954050 |
| H | -6.66855436096736 | -0.72147271249453 | 1.38907799854970  |
| H | -5.98996487593382 | 0.82195446879109  | 1.94139258422496  |
| C | -6.61254827140883 | 0.34997162419231  | 1.17280745350686  |
| H | -7.62518033071578 | 0.76325455951158  | 1.24709466014358  |

---

|   |                   |                   |                   |
|---|-------------------|-------------------|-------------------|
| H | -6.53079159812647 | 0.10112502447345  | -2.29443085693497 |
| C | -6.92551975021873 | -0.06994387803773 | -1.28659001112176 |
| H | -6.98499008481393 | -1.15033984696066 | -1.12188756321413 |
| H | 6.56787540769762  | 0.92811811387737  | 1.45146021813045  |
| H | 5.47982004230344  | 2.07244332405747  | -0.46399597356746 |
| C | 1.57893153588029  | -0.18825890104796 | -1.90055093394108 |
| C | 1.83470239030250  | -1.18636155672485 | -1.00184859267679 |
| C | 2.07368887536274  | 0.41815572228147  | -3.12104789365002 |
| C | 2.81552022836408  | -2.17255112780002 | -0.62425946512768 |
| C | 4.71848359015671  | -4.01001956533284 | 0.27507274962632  |
| C | 4.14868761814128  | -2.08278451782250 | -1.06104759975591 |
| C | 2.45260376369590  | -3.18831375104701 | 0.27605404494226  |
| H | 3.10779524381619  | -4.89796983091651 | 1.39768322681818  |
| H | 4.44385271450550  | -1.28158036653486 | -1.73234593448489 |
| C | 5.09213404562958  | -2.99191295056618 | -0.60318281303677 |
| C | 3.39733554001526  | -4.10808194895932 | 0.71070663622219  |
| H | 1.42330723255031  | -3.24637342934842 | 0.62102528004061  |
| H | 1.03259561550076  | 2.27863101623447  | -2.79025492455666 |
| H | 5.45943757839177  | -4.72387154836817 | 0.62357820537973  |
| C | 3.01707436743018  | 1.61074317567253  | -5.46617424094409 |
| C | 2.91966751754694  | -0.29328097216679 | -3.98655935750944 |
| H | 3.19352969242191  | -1.31759865708280 | -3.75033259462141 |
| C | 1.69369458805212  | 1.72714854306511  | -3.45364837847905 |
| H | 4.03505547694115  | -0.25559507570019 | -5.81898796234824 |
| C | 3.38466829207574  | 0.30223172279723  | -5.15138711787605 |
| C | 2.17048979313457  | 2.32012892200764  | -4.61597821783762 |
| H | 1.87897868281018  | 3.33734780119716  | -4.86112154850542 |
| H | 3.38639909524704  | 2.07412951063916  | -6.37658289053742 |
| H | -5.28185880684516 | -1.93739831544130 | 0.11604157977559  |

---

**Phosphenium ion 2a + Diphenylacetylene TS-IIb**E[a.u.] (r<sup>2</sup>-SCAN-3c-CPCM(CH<sub>2</sub>Cl<sub>2</sub>): -2591.41642Gibbs free energy correction (kcal mol<sup>-1</sup>): 510.89E[a.u.] (PW6B95-D4/def2-QZVPP-SMD(CH<sub>2</sub>Cl<sub>2</sub>): -2596.008385

|   |                   |                   |                   |
|---|-------------------|-------------------|-------------------|
| C | -4.11070382842564 | -0.21444110587956 | -0.19212748885900 |
| C | -2.99499182945332 | 0.51060087206380  | -0.61847451765030 |
| H | -0.06584435176193 | -1.16009105814361 | 4.96053802214023  |
| C | -1.73800286789016 | -0.04846365287433 | -0.44005599069047 |
| H | -1.61586217944719 | 2.29326269315764  | -2.47318440683156 |
| C | -2.66937958178812 | -2.05364095312304 | 0.61088660170553  |
| C | -2.48377282141535 | -3.40962448353200 | 1.29306109816881  |
| C | -5.53221910433633 | 0.33266506878265  | -0.35124560792539 |
| C | -3.92498035128932 | -1.47262272440357 | 0.39672827352195  |
| H | -3.10161423448370 | 1.48923144923392  | -1.06496574017378 |
| N | -0.47582783973280 | 0.50909815859017  | -0.78319685378535 |
| C | -1.59311027600641 | -1.29107510381385 | 0.16991698967824  |
| O | -0.25294067165227 | -1.66342122762643 | 0.30444018463840  |
| C | 0.73787736914139  | 2.46184481796735  | -0.01547572837532 |
| C | 0.65217615011525  | -0.10527297478645 | 3.23348780531636  |
| P | 0.79824737085040  | -0.47136060459418 | -0.15241709879354 |
| P | 1.60661511615298  | 1.22601073209364  | 0.97786959091284  |
| C | -0.52326782441833 | 0.94419434978042  | 5.05671792933561  |
| C | 0.75894515753610  | 1.13418495427538  | 2.59442069211427  |
| H | -0.84749293342092 | 3.06667297560761  | 4.87604474383348  |
| C | 4.06892079247235  | 2.47490670413662  | 0.54144059021518  |
| C | 3.34054379762032  | 1.56634670190599  | 1.31929622846354  |
| H | 5.74921967607113  | 0.65319650141963  | 3.52886901045803  |
| C | 5.39538995568678  | 2.73468625354031  | 0.86300174733041  |
| C | 0.21652063576327  | 2.27941127005137  | 3.18665240503775  |
| C | -0.42233924125062 | 2.17881698330321  | 4.41749815971720  |
| H | -1.02723527073865 | 0.87126856435072  | 6.01618669621986  |
| C | 0.01494857754437  | -0.19637511721688 | 4.46675715847072  |
| H | 1.06781939609485  | -1.00199081922018 | 2.77771078795804  |
| H | 3.37818513434915  | 0.22170280860661  | 3.02003875518845  |
| H | 0.28474635249055  | 3.24392527250044  | 2.69140664662313  |
| C | 3.94329579632795  | 0.91447278163180  | 2.40408733390956  |
| C | 6.00235045090518  | 2.07728190637737  | 1.93024289290002  |
| H | -7.36928985171401 | -0.24348848437135 | -1.35920511119394 |
| C | 5.27832327648946  | 1.16453763987706  | 2.69487163821645  |
| H | 3.61207552075417  | 2.97602533855530  | -0.30428560379671 |
| C | -0.63975597457268 | 4.09075041916720  | -1.78702169181746 |
| C | 0.30270158730759  | 4.64335595364100  | -0.92669845359413 |
| C | 1.00330503369399  | 3.82693518118948  | -0.04046308907581 |

|   |                   |                   |                   |
|---|-------------------|-------------------|-------------------|
| H | -1.16414488426946 | 4.72417529075729  | -2.49602423512965 |
| C | -0.24100829865740 | 1.90760651979457  | -0.86663283741240 |
| H | 4.81887116586991  | -4.04618825222912 | -3.35928399664661 |
| H | 1.75032930785850  | 4.25546021367436  | 0.62117463635661  |
| C | -0.91106879534051 | 2.72306394651287  | -1.76950771755076 |
| H | 0.51029864796971  | 5.70825623329300  | -0.95282486056303 |
| H | -4.39897321477641 | -3.43615086707876 | 2.35887798479957  |
| H | -4.44598799418111 | -4.23019957896057 | 0.76623441448517  |
| H | -3.64108282339585 | -5.01838856506323 | 2.13139888894205  |
| H | -5.12318087264331 | 1.69563306797518  | -2.01622404438391 |
| H | -6.59008131664596 | 2.05771017524560  | -1.09596406554974 |
| H | -5.00853120528699 | 2.45855677005292  | -0.41193610047971 |
| C | -3.82944568277693 | -4.05141277891415 | 1.65390627284664  |
| H | -0.72836184255374 | -4.01735821648022 | 0.11805965605650  |
| H | -1.64710138465781 | -5.35537798073013 | 0.82541215178335  |
| C | -1.73544596395270 | -4.37232932128893 | 0.34936808317008  |
| H | -2.28508053601858 | -4.49494841859153 | -0.59058902032739 |
| H | -0.67856255497365 | -2.83208314173812 | 2.40369133075194  |
| C | -1.68077786861758 | -3.22261574412117 | 2.59600256837386  |
| H | -2.19801695386985 | -2.53070073402515 | 3.26996813317310  |
| H | -1.57848621902295 | -4.18757010204518 | 3.10548619894127  |
| C | -5.55302056348073 | 1.71777734768852  | -1.00842504162462 |
| H | -6.26197097064799 | -0.52615033654533 | 1.53292906829248  |
| H | -5.61811434755670 | 1.12067918353331  | 1.68323228356429  |
| C | -6.19184950022255 | 0.44691978780205  | 1.03695134807796  |
| H | -7.20673475884916 | 0.84793461890099  | 0.93471033572735  |
| H | -5.89472758013882 | -0.73635438613039 | -2.22003858385712 |
| C | -6.35242656077304 | -0.63158219963451 | -1.23005150449696 |
| H | -6.42551943110267 | -1.62647545756056 | -0.77974967490759 |
| H | 7.04216354769207  | 2.27981182787969  | 2.17013701309334  |
| H | 5.95677833243021  | 3.44905804222040  | 0.26843353928281  |
| C | 2.49799869958846  | 0.29240094270657  | -1.29233154657037 |
| C | 2.09680623599993  | -0.97858671673414 | -1.22567144225480 |
| C | 3.34428354329372  | 1.05818367334121  | -2.17352339531161 |
| C | 2.31084216350244  | -2.24302128775096 | -1.93557905153446 |
| C | 2.74419093636187  | -4.62652718678366 | -3.33465582595619 |
| C | 3.60257668639391  | -2.59473671886575 | -2.35212726369672 |
| C | 1.23963172052384  | -3.09892992858089 | -2.22606102930465 |
| H | 0.61976944194113  | -4.93391817021174 | -3.14764313356042 |
| H | 4.44103215828765  | -1.94881416616691 | -2.11533805101488 |
| C | 3.81298979336764  | -3.77981947094727 | -3.04732646107066 |
| C | 1.45844779753172  | -4.28098296863965 | -2.92343286155563 |
| H | 0.23119846664986  | -2.83503382445766 | -1.92123445821197 |
| H | 1.71527632634386  | 2.23553489378305  | -2.96457880830608 |

---

|   |                   |                   |                   |
|---|-------------------|-------------------|-------------------|
| H | 2.91329445811778  | -5.55348046482723 | -3.87497502774125 |
| C | 4.98805308397435  | 2.66034233878844  | -3.78919506116633 |
| C | 4.73813672668368  | 0.87369726061564  | -2.18094358088195 |
| H | 5.18535208849962  | 0.12876624477535  | -1.52953028437496 |
| C | 2.78918927102550  | 2.07136799012713  | -2.97598521903078 |
| H | 6.62260743655175  | 1.52128132294770  | -2.96908348119018 |
| C | 5.54654414361221  | 1.67242778601682  | -2.98119860151832 |
| C | 3.60650421674890  | 2.85149219942635  | -3.78385747377027 |
| H | 3.16062007725411  | 3.62046529377187  | -4.40883961464941 |
| H | 5.62382976060905  | 3.28026352792987  | -4.41434283196135 |
| H | -4.80148922384040 | -2.02264555667908 | 0.71537668033311  |

### Phosphenium ion 2a + Diphenylacetylene

E[a.u.] ( $r^2$ -SCAN-3c-CPCM( $\text{CH}_2\text{Cl}_2$ ): -2591.489934

Gibbs free energy correction ( $\text{kcal mol}^{-1}$ ): 511.85

E[a.u.] (PW6B95-D4/def2-QZVPP-SMD( $\text{CH}_2\text{Cl}_2$ ): -2596.074741

|   |                   |                   |                   |
|---|-------------------|-------------------|-------------------|
| C | 3.94682328411693  | 1.30102840286164  | -0.43766250360890 |
| C | 2.74630008649225  | 1.54514605288692  | 0.23413960857044  |
| H | -2.82221952417560 | 3.05508255956380  | 2.24315722979586  |
| C | 2.08179797722183  | 0.46759711345014  | 0.80166118171490  |
| H | 2.32318856802195  | 2.53980762632251  | 0.31878307761248  |
| C | 3.75597354516494  | -1.12514936192313 | 0.02134028956667  |
| C | 4.28379206216529  | -2.55541444918713 | -0.09510800625972 |
| C | 4.76864092541088  | 2.43100939687303  | -1.06511068750446 |
| C | 4.41097730574361  | -0.01863608008454 | -0.53741138116518 |
| H | 5.33490925790527  | -0.19519543303727 | -1.07424899635352 |
| N | 0.85263520519279  | 0.49553069107334  | 1.48975468772361  |
| C | 2.58125190652183  | -0.82812813670159 | 0.70651814223586  |
| O | 1.82225773972077  | -1.76544760315672 | 1.40628198750169  |
| C | -1.07645786289489 | 1.85128487881196  | 1.81330474554840  |
| C | -0.49803204398063 | 3.08876885812551  | -1.11395157715884 |
| P | 0.40502940130618  | -1.10838728408603 | 2.01102679490951  |
| P | -1.69677019368375 | 1.04220946426968  | 0.30953117051946  |
| C | 0.91715059039080  | 2.77070230492012  | -3.04053525354007 |
| C | -0.66590672094677 | 1.70087228729089  | -1.02412750594224 |
| H | -0.97782877552009 | 3.75222260578551  | -0.39839282058487 |
| C | -3.81292401321491 | 2.40140058755038  | -0.93528039134417 |
| C | -3.41075012668159 | 1.58419921649638  | 0.12130080587823  |
| H | -4.02936869010585 | 0.48818815599652  | 1.88420995808105  |
| C | -5.15049594740816 | 2.77074005231336  | -1.04413096354444 |
| C | -0.02264859500264 | 0.85020220653988  | -1.92554941610067 |
| C | 0.76816377735526  | 1.39141235038497  | -2.93417527791678 |
| H | 0.41576435929942  | 4.69340316042098  | -2.20390718085525 |



|   |                   |                   |                   |
|---|-------------------|-------------------|-------------------|
| C | 0.28863507546231  | 3.61763348327613  | -2.12881171539625 |
| H | 1.53436533463644  | 3.19000337717557  | -3.82998202748883 |
| H | -0.12177474657548 | -0.22751851548203 | -1.83663867214148 |
| H | 1.27309276068964  | 0.73009202149089  | -3.63177279613908 |
| C | -4.34135078426873 | 1.13291698660069  | 1.06541277922549  |
| C | -6.07811408188044 | 2.32462602720995  | -0.10751454892822 |
| H | 6.70677103449192  | 1.52158829760234  | -0.57941590753273 |
| C | -5.67356715700847 | 1.50631925401651  | 0.94666724945987  |
| H | -5.46627745028471 | 3.40331902745367  | -1.86815722044421 |
| C | 0.25410548297257  | 3.46926420595768  | 3.63286449824648  |
| C | -1.10513102129004 | 3.66615454840989  | 3.38682077763802  |
| C | -1.77762150174638 | 2.86692035729398  | 2.46874147124909  |
| H | -1.64089311601919 | 4.45957454728460  | 3.89825787768027  |
| C | 0.27438402135280  | 1.62186746735469  | 2.10762162811127  |
| H | -3.09719078648471 | 2.73647171515203  | -1.67953501492709 |
| H | 0.77150330924129  | 4.10716429201411  | 4.34341341456829  |
| C | 0.95148371187698  | 2.44418978077056  | 3.00123669112978  |
| H | 2.00002140429781  | 2.26086029421262  | 3.21655127273535  |
| H | 5.39606413778477  | -2.26184404749875 | -1.95964236556784 |
| H | 6.37848597123466  | -2.04655222297718 | -0.49112736491315 |
| H | 5.88792961220407  | -3.66764243523092 | -1.00205912765400 |
| H | 4.74547196144429  | 4.57323241597382  | -1.32137272022071 |
| H | 3.12743289589765  | 3.85499061519237  | -1.32500418840853 |
| H | 4.01597865313051  | 4.04843802457648  | 0.20371920493712  |
| C | 5.56251064633909  | -2.62408851867291 | -0.93910305872142 |
| H | 3.72217504745042  | -3.13865441673014 | 1.94642463278929  |
| H | 5.00978028629041  | -4.11928071411310 | 1.22311043509016  |
| C | 4.60917334203143  | -3.10268442048990 | 1.30930575421302  |
| H | 5.36387880046265  | -2.47724460975753 | 1.79901461076808  |
| H | 2.29898528331386  | -3.49582980545888 | -0.18103371533034 |
| C | 3.21898568344080  | -3.44476782876831 | -0.76861820479186 |
| H | 2.97083688945115  | -3.05990982062296 | -1.76448434199115 |
| H | 3.60840701872833  | -4.46305717784282 | -0.88205235354297 |
| C | 4.11789457664751  | 3.80375742006645  | -0.85966784321178 |
| H | 5.43064754902146  | 1.24323222525737  | -2.78777944743861 |
| H | 3.92915365322399  | 2.14753292754249  | -3.05936401096955 |
| C | 4.91323433079299  | 2.18487043102904  | -2.57903708327803 |
| H | 5.49053608661708  | 2.99668068930429  | -3.03663685246832 |
| H | 6.76229746497100  | 3.27240778266064  | -0.84896501796067 |
| C | 6.16673565531254  | 2.45966374598851  | -0.41711829089985 |
| H | 6.08796196184140  | 2.62613626889393  | 0.66314064903828  |
| H | -6.39735359353051 | 1.15531120523948  | 1.67593578477844  |
| H | -7.12170043408986 | 2.61168213600928  | -0.19910606991771 |
| C | -0.81540337723153 | -1.61610198664134 | 0.69549870846196  |

---

|   |                   |                   |                   |
|---|-------------------|-------------------|-------------------|
| C | -1.74058264437305 | -0.79173332837054 | 0.15814448885879  |
| C | -0.75898106543474 | -3.06266665906033 | 0.41547621410918  |
| C | -2.90320868215858 | -1.30269484789713 | -0.61789458610890 |
| C | -0.55944707618977 | -5.35323367398267 | 1.17477950290784  |
| C | -0.52482980586477 | -4.86162430487938 | -1.18534132942843 |
| H | -0.77970840687447 | -3.67112562817408 | 2.49177794590091  |
| C | -0.69258785856187 | -3.99757195436573 | 1.45829951168850  |
| C | -0.47344202644136 | -5.78883409207450 | -0.14486490905692 |
| H | -0.45034898533518 | -5.19476890491896 | -2.21663068608695 |
| C | -0.66687193589621 | -3.50842876405971 | -0.91050690329079 |
| H | -0.52623347024482 | -6.07053021203897 | 1.98970064290091  |
| H | -0.36552107543375 | -6.84733294262092 | -0.36324491665065 |
| H | -0.69570398176550 | -2.78532210589068 | -1.72056815886441 |
| C | -5.13116336974870 | -2.29172331149028 | -1.99327161112379 |
| C | -4.86850518838723 | -2.71417863495524 | -0.69112370903721 |
| H | -2.52699754518515 | -0.15727585653341 | -2.41284157451945 |
| C | -3.17827288801332 | -0.87453668681591 | -1.92049941043645 |
| C | -4.28280354184483 | -1.37213966940886 | -2.60460365391599 |
| H | -4.47983744712838 | -1.03756317352422 | -3.61903470867607 |
| C | -3.76344401875040 | -2.22395362785729 | -0.00700634517377 |
| H | -3.56348406854485 | -2.54558147982136 | 1.01124951333896  |
| H | -5.52986591108774 | -3.42472169427794 | -0.20353579094080 |
| H | -5.99595104939427 | -2.67491436346629 | -2.52722875900945 |

**Phosphenium ion 2a + Phenylacetylene TS<sub>conc</sub>**

E[a.u.] (r<sup>2</sup>-SCAN-3c-CPCM(CH<sub>2</sub>Cl<sub>2</sub>): -2360.416634

Gibbs free energy correction (kcal mol<sup>-1</sup>): 456.6

E[a.u.] (PW6B95-D4/def2-QZVPP-SMD(CH<sub>2</sub>Cl<sub>2</sub>): -2364.520705

|   |                   |                   |                   |
|---|-------------------|-------------------|-------------------|
| C | -4.13773905001181 | 0.75899034083021  | -0.01147459542841 |
| C | -4.64761240977922 | -0.53659373655500 | 0.03528778027974  |
| H | -7.17135679021517 | -6.29280727268987 | -0.23421343962829 |
| C | -3.76968165007221 | -1.59186166011898 | 0.27787649547292  |
| H | -5.69654347352516 | -0.72927563685757 | -0.14096355812018 |
| C | -1.84202565704640 | -0.07671475690142 | 0.35387999619284  |
| C | -0.33704080733959 | 0.15354022871903  | 0.48997815220064  |
| C | -5.04022425131349 | 1.97051098301271  | -0.25955230358736 |
| C | -2.75832649580674 | 0.96010498343078  | 0.16858455768889  |
| H | -2.38211189752673 | 1.97515630981494  | 0.13949551440022  |
| N | -4.05418068136863 | -2.97121932433027 | 0.30169125079965  |
| C | -2.39984498605508 | -1.35600867012015 | 0.39994080683716  |
| O | -1.67116255598517 | -2.51757448309762 | 0.49214118425896  |
| C | -5.63745516799708 | -4.81345000753560 | 0.03864321396726  |
| C | -5.08602238903531 | -4.98964993752332 | -3.10840768861036 |

|   |                   |                    |                   |
|---|-------------------|--------------------|-------------------|
| P | -2.58060234455832 | -3.93070786003011  | 0.32173352847495  |
| P | -4.21129017618201 | -5.76693303665136  | -0.55051050190724 |
| C | -3.60771953559860 | -4.58923429362418  | -4.97430598538514 |
| C | -3.98247032346423 | -5.28035950783247  | -2.30155278586691 |
| H | -6.09115884729302 | -5.02927196044649  | -2.69686470573940 |
| C | -4.04642410724552 | -8.30613408653939  | -1.65178401300375 |
| C | -4.63354861990425 | -7.53998980096631  | -0.63263136613957 |
| H | -5.89648054434404 | -7.61176502147663  | 1.12721835446660  |
| C | -4.27849415823540 | -9.67411914313785  | -1.72030026852826 |
| C | -2.69141436101927 | -5.22001287728277  | -2.83444759965321 |
| C | -2.50742489234490 | -4.88075371955708  | -4.17211065480234 |
| H | -5.75333884133315 | -4.41128777771061  | -5.06607724373880 |
| C | -4.89485229791185 | -4.64232912911852  | -4.44201277418656 |
| H | -3.46280036048173 | -4.31744217813737  | -6.01609019223910 |
| H | -1.83004632010080 | -5.44469756681198  | -2.20963607918738 |
| H | -1.50354719555165 | -4.84040040916617  | -4.58450958559749 |
| C | -5.43550736022506 | -8.17528521030857  | 0.32484210603508  |
| C | -5.09402872520624 | -10.29734046625334 | -0.77748178294672 |
| H | -3.54161862590023 | 3.07454200473559   | -1.42501376167166 |
| C | -5.67019140533169 | -9.54411227852828  | 0.24016909975578  |
| H | -3.82398340353080 | -10.25301069435901 | -2.51900853412154 |
| C | -7.59723158036490 | -3.33528422737792  | 1.35838812130018  |
| C | -7.91821205203364 | -4.57421745180271  | 0.81350558488249  |
| C | -6.93231302693471 | -5.31310223503220  | 0.16659403507841  |
| H | -8.92070706198699 | -4.97847831907975  | 0.91184623216951  |
| C | -5.34204951304610 | -3.51375853775206  | 0.50738933498187  |
| H | -3.41764596467965 | -7.83481280906842  | -2.40111618264048 |
| H | -8.34109453616402 | -2.77185619713247  | 1.91387252316530  |
| C | -6.32162212704776 | -2.80404182112510  | 1.20767503701201  |
| H | -6.08162507632401 | -1.84879610596098  | 1.65911005456951  |
| H | -0.27357699142521 | 2.11738888440319   | -0.48182402319301 |
| H | -0.46534174582832 | 2.19079465098080   | 1.28642235035591  |
| H | 1.09695972863695  | 1.75595797175712   | 0.57644113042348  |
| H | -5.27739044697589 | 2.41262686380299   | 1.86560007581596  |
| H | -3.93282057419737 | 3.28657852409719   | 1.10589764691488  |
| H | -5.60198238504792 | 3.78917680087701   | 0.78918860797976  |
| C | 0.01336530596969  | 1.64662906519107   | 0.46479946988294  |
| H | -0.00074760762163 | -1.50646590230048  | 1.89075372825819  |
| H | 1.23289488863870  | -0.23549353833334  | 1.93602698163672  |
| C | 0.15928106096158  | -0.42729818223422  | 1.82931039407293  |
| H | -0.35889967252748 | 0.04911912959079   | 2.66896541816676  |
| H | 1.47272339822089  | -0.33870316016208  | -0.60098833827115 |
| C | 0.39622207590432  | -0.52684206568698  | -0.68395823909118 |
| H | 0.23859902852691  | -1.60793596787413  | -0.69165554474826 |

---

|   |                   |                    |                   |
|---|-------------------|--------------------|-------------------|
| H | 0.04989154709976  | -0.11820453617866  | -1.63970449762007 |
| C | -4.95272739071194 | 2.92101479573010   | 0.95081130263516  |
| H | -6.64161280641462 | 0.92003064548953   | -1.32229359911747 |
| H | -6.91146225331979 | 1.06611492882441   | 0.43111168655198  |
| C | -6.50848261638667 | 1.57358635721089   | -0.45283616558785 |
| H | -7.10525351759593 | 2.47611041882687   | -0.62019580673793 |
| H | -4.61242974048056 | 2.04842934218818   | -2.39895139810788 |
| C | -4.56855494946959 | 2.71008706846036   | -1.52664835013380 |
| H | -5.21608909287736 | 3.57396376619273   | -1.71547590382252 |
| H | -6.30575366561057 | -10.01899624513547 | 0.98223753731790  |
| H | -5.27940076574252 | -11.36589973695637 | -0.83781014585115 |
| C | -2.56561969150076 | -4.60855777974800  | 2.08755469913131  |
| C | -3.34083282082486 | -5.59352821831248  | 2.30912316478686  |
| H | -1.92849136679162 | -4.06494077625065  | 2.78196784621179  |
| C | -4.13834811471003 | -6.57940617087258  | 2.86683174216789  |
| C | -5.70463993832376 | -8.53936569907165  | 4.08294345378263  |
| C | -3.66688620969574 | -7.91306873853407  | 2.95740396322481  |
| C | -5.41970324408519 | -6.24916399154016  | 3.38078556755557  |
| H | -2.69397341993061 | -8.16169128066843  | 2.54589043693045  |
| H | -4.07934747335337 | -9.89047240258545  | 3.66132318472975  |
| C | -4.44543525779684 | -8.87148512840499  | 3.58053247081220  |
| C | -6.18811521246174 | -7.23100306561746  | 3.97640744321656  |
| H | -6.31488401660720 | -9.30219995787531  | 4.55727270241017  |
| H | -5.77889757532542 | -5.22804455973224  | 3.29577038392647  |
| H | -7.16968682289495 | -6.98079975209041  | 4.36757726212336  |

**Phosphenium ion 2a + Phenylacetylene TS<sub>conc'</sub>**

E[a.u.] (r<sup>2</sup>-SCAN-3c-CPCM(CH<sub>2</sub>Cl<sub>2</sub>): -2360.41138

Gibbs free energy correction (kcal mol<sup>-1</sup>): 456.66

E[a.u.] (PW6B95-D4/def2-QZVPP-SMD(CH<sub>2</sub>Cl<sub>2</sub>): -2364.513905

|   |                   |                   |                   |
|---|-------------------|-------------------|-------------------|
| C | 2.86218428215170  | -2.07116637397667 | -0.67031351829469 |
| C | 1.58001639952515  | -2.00577236151163 | -1.20068637343569 |
| H | -4.66023283935479 | -1.98231188105762 | -1.39834189486918 |
| C | 0.90840076858714  | -0.78364647762381 | -1.13108818014709 |
| H | 1.09802060690408  | -2.86860063200095 | -1.64118244592659 |
| C | 2.77325261658498  | 0.30224399125817  | 0.04665401130626  |
| C | 3.36496619059856  | 1.51887307991524  | 0.75537620934016  |
| C | 3.68614045648701  | -3.35949402805464 | -0.70641860637527 |
| C | 3.42742772601687  | -0.92138191931066 | -0.07175558089543 |
| H | 4.42963141749607  | -1.00298685455109 | 0.33064694761030  |
| N | -0.38097261697103 | -0.46124762004055 | -1.50338752919317 |
| C | 1.49780995907436  | 0.33133378110351  | -0.52326977381070 |
| O | 0.66546825287327  | 1.40870924621686  | -0.50320392634732 |

|   |                   |                   |                   |
|---|-------------------|-------------------|-------------------|
| C | -2.63672584748041 | -1.24816305027210 | -1.38852361350523 |
| C | -1.10083023537323 | -0.43471830612427 | 2.14236361442577  |
| P | -0.89632948870816 | 1.17330162341272  | -1.07822282421995 |
| P | -2.75406455145443 | 0.02551427566312  | -0.07034552930592 |
| C | -1.24518626597725 | -2.38759620514736 | 3.54992927937680  |
| C | -2.19413563642949 | -0.89229826960250 | 1.40079907470044  |
| H | -0.61903283244228 | 0.50776609228687  | 1.89766499829792  |
| C | -5.19449433441286 | 0.36011988956864  | 1.25957680088657  |
| C | -4.52876095413865 | 0.39582933820144  | 0.03094686635507  |
| H | -4.68404824091633 | 0.85115895056229  | -2.07994537718471 |
| C | -6.53808632718718 | 0.71750451574073  | 1.32356253137636  |
| C | -2.80682376289446 | -2.10708376482919 | 1.73191691017562  |
| C | -2.33905402739803 | -2.84259514343065 | 2.81357309054223  |
| H | 0.22998394048904  | -0.83402253014860 | 3.77948943238228  |
| C | -0.62483881581312 | -1.18897722043419 | 3.21162703536820  |
| H | -0.87586467356230 | -2.97218717468070 | 4.38767689467468  |
| H | -3.64721313828922 | -2.47698982102713 | 1.15016317053567  |
| H | -2.82349057315223 | -3.77812854509461 | 3.07721346413118  |
| C | -5.20148386988966 | 0.81147213430209  | -1.12479748238893 |
| C | -7.21173109284307 | 1.12237825341322  | 0.17410296115598  |
| H | 2.00913211434713  | -4.76113227071592 | -0.84055023439254 |
| C | -6.54172217199488 | 1.17103524879239  | -1.04737286693285 |
| H | -7.05755506966413 | 0.67809312602226  | 2.27648606926110  |
| C | -2.18287039620641 | -3.05006450437223 | -3.46760372974906 |
| C | -3.44123314548770 | -2.96466334292806 | -2.87718772802533 |
| C | -3.67432957225649 | -2.05356671059673 | -1.84883123550725 |
| H | -4.24736142189473 | -3.60655206627517 | -3.21890404216076 |
| C | -1.36720655956319 | -1.35059258711030 | -1.98748217831438 |
| H | -4.67343509778143 | 0.04861823671454  | 2.16098140598563  |
| H | -2.01014285235774 | -3.74999025918333 | -4.27961061132816 |
| C | -1.14101778621459 | -2.23178168988531 | -3.03934869746744 |
| H | -0.17290590180911 | -2.26237819188183 | -3.52922287590382 |
| H | 2.41637877994274  | 3.02740038474177  | -0.53540542669644 |
| H | 3.87690484065361  | 3.57522735231322  | 0.30073119063850  |
| H | 4.01384826070877  | 2.48394160380432  | -1.09315285361131 |
| H | 4.63125984257026  | -3.02080169326663 | 1.24833961179402  |
| H | 3.12304289683079  | -3.95405807646450 | 1.31760553536351  |
| H | 4.61523585494546  | -4.71026856826682 | 0.71764245509347  |
| C | 3.41369169415993  | 2.72230165211470  | -0.20804673639915 |
| H | 1.46758182672184  | 2.12958274674367  | 1.68274456188106  |
| H | 2.44127308622880  | 1.01623716728881  | 2.66920564040034  |
| C | 2.48702898409648  | 1.86412194881481  | 1.97646174985251  |
| H | 2.91954721027777  | 2.71979386358406  | 2.50746913555293  |
| H | 4.81773759136903  | 0.42384697697278  | 1.97625665906956  |

---

|   |                   |                   |                   |
|---|-------------------|-------------------|-------------------|
| C | 4.78956966631035  | 1.24439484147286  | 1.25100523980309  |
| H | 5.46718972553169  | 1.00492140940895  | 0.42398292469537  |
| H | 5.16993272968290  | 2.14257388827168  | 1.74778946356197  |
| C | 4.03461861052364  | -3.78104525873322 | 0.73469795519796  |
| H | 5.57863240107245  | -4.02567057441941 | -1.53752018126589 |
| H | 4.75887431131553  | -2.79445693490508 | -2.52251126657309 |
| C | 4.98508260043233  | -3.10538296390469 | -1.49654359789824 |
| H | 5.59938730679749  | -2.32881136836359 | -1.03031056849082 |
| H | 2.67958166627378  | -4.28128151827615 | -2.41828074060054 |
| C | 2.93160894803759  | -4.51282248818645 | -1.37728651388599 |
| H | 3.56712876360319  | -5.40418123599320 | -1.37825479734319 |
| H | -7.06400776130940 | 1.48974849163926  | -1.94463953412684 |
| H | -8.25976979036957 | 1.40225538070975  | 0.22940609695382  |
| C | -1.44539257221752 | 2.82634548190475  | 0.18047732349046  |
| C | -2.30810840464841 | 2.24229988811599  | 0.88364638861636  |
| C | -0.63888756646903 | 4.01697785664684  | -0.01805965197897 |
| H | -2.99780007678683 | 2.16744478079400  | 1.70665665941197  |
| C | 0.49628912041191  | 5.58987234510036  | -1.46084838092567 |
| C | 0.62736634032193  | 5.84347351574090  | 0.93488282412244  |
| H | -0.64868635102071 | 3.91212164338704  | -2.17147961010020 |
| C | -0.29280092473134 | 4.45699809290917  | -1.30077155164617 |
| C | 0.96348213589674  | 6.28172683509129  | -0.34503258696322 |
| H | 0.98976351299320  | 6.37953025833636  | 1.80753207843559  |
| C | -0.17276989685187 | 4.72015602443132  | 1.10313948169419  |
| H | 0.75294236284116  | 5.92966945661708  | -2.46002738978740 |
| H | 1.58902457846646  | 7.16054192696655  | -0.47235397634769 |
| H | -0.43503693583001 | 4.37141288555115  | 2.09769847680496  |

**Phosphenium ion 2a + Phenylacetylene TS-I**

E[a.u.] (r<sup>2</sup>-SCAN-3c-CPCM(CH<sub>2</sub>Cl<sub>2</sub>): -2360.393682

Gibbs free energy correction (kcal mol<sup>-1</sup>): 455.64

E[a.u.] (PW6B95-D4/def2-QZVPP-SMD(CH<sub>2</sub>Cl<sub>2</sub>): -2364.507276

|   |                   |                   |                   |
|---|-------------------|-------------------|-------------------|
| C | -0.55601373200102 | 3.82592428453708  | 0.13357990029759  |
| C | -1.33634122378020 | 2.67008493064165  | 0.04969011508572  |
| H | -3.46758857764085 | -2.75469306909342 | -2.40644681571564 |
| C | -0.74887740435649 | 1.45091978156253  | 0.36917667146610  |
| H | -2.37077459628432 | 2.71097481362503  | -0.26399985266408 |
| C | 1.41737630541956  | 2.50005064513003  | 0.81347117754129  |
| C | 2.89705121867164  | 2.39362735648179  | 1.18367232564221  |
| C | -1.13012277216969 | 5.21045419954760  | -0.18301438724203 |
| C | 0.78776242863025  | 3.71650488752924  | 0.52005937487951  |
| H | 1.37644043566581  | 4.62294442622624  | 0.58602390746085  |
| N | -1.28840207966102 | 0.16400685371304  | 0.31912075093885  |

|   |                   |                   |                   |
|---|-------------------|-------------------|-------------------|
| C | 0.59526421474748  | 1.38017129077153  | 0.72981777768029  |
| O | 1.03659947160565  | 0.08495382152701  | 0.94241592315656  |
| C | -2.39425608176207 | -1.36630770313958 | -1.15496475568644 |
| C | -0.43439498157276 | -1.94035254831017 | -3.96777161487233 |
| P | -0.08516415772821 | -1.12241160367084 | 0.63370743566084  |
| P | -0.74713575115364 | -2.09886950789023 | -1.22273100325790 |
| C | 1.31013988709066  | -0.68794441226722 | -5.06719037360722 |
| C | 0.09747617279591  | -1.56180430962995 | -2.72845557660915 |
| H | -1.31497001841441 | -2.57553536400904 | -4.02372317372652 |
| C | 0.04151301203419  | -4.68286703328618 | -1.84023292270149 |
| C | -0.84933082135986 | -3.88533966302202 | -1.11362179984774 |
| H | -2.45473318637679 | -3.83703605111119 | 0.33915068097163  |
| C | -0.00080121262660 | -6.06314268911052 | -1.68511764196425 |
| C | 1.22596491304945  | -0.74209042699192 | -2.65792590496460 |
| C | 1.82771996466350  | -0.30385263090857 | -3.83352840196560 |
| H | -0.21863714767923 | -1.80635650126336 | -6.09725899758230 |
| C | 0.18276658703259  | -1.50630608900445 | -5.13399497139585 |
| H | 1.78568183246103  | -0.34854846918478 | -5.98286672739095 |
| H | 1.64069764721772  | -0.44762556640844 | -1.69787880185569 |
| H | 2.70372335842172  | 0.33554078146086  | -3.78121671451322 |
| C | -1.76797856681440 | -4.46039036816384 | -0.22685109440609 |
| C | -0.91305383380114 | -6.64107479725620 | -0.80412288731390 |
| H | 0.72491608684139  | 5.97348673228299  | -1.07568249664990 |
| C | -1.79268837684785 | -5.84152094591188 | -0.07632402989822 |
| H | 0.68280373936153  | -6.68788005000373 | -2.25184417623570 |
| C | -4.83379746547215 | -0.11363919325431 | -0.75973518867642 |
| C | -4.75451986094656 | -1.23053071302816 | -1.59215056639179 |
| C | -3.53479877929811 | -1.87138643111943 | -1.77695878380384 |
| H | -5.64384513594627 | -1.60675315680030 | -2.08755255014273 |
| C | -2.47396345370719 | -0.23395297434178 | -0.31167052676323 |
| H | 0.76019324163916  | -4.23137685175644 | -2.51821139505220 |
| H | -5.79174189938035 | 0.37369877228058  | -0.60289746588934 |
| C | -3.71058418750242 | 0.37671018632887  | -0.10178741044503 |
| H | -3.79677624374161 | 1.21065182488709  | 0.58661454329013  |
| H | 3.53949146745520  | 4.27144921820076  | 0.25371859409104  |
| H | 3.11189164915206  | 4.42563921284494  | 1.97443523443942  |
| H | 4.62463242687580  | 3.63869281722091  | 1.50027059558010  |
| H | -1.57609773053594 | 5.66945466406004  | 1.90412032740973  |
| H | 0.02100496401466  | 6.23672000890461  | 1.37923763857256  |
| H | -1.43678606422398 | 7.09657266796571  | 0.85416509588256  |
| C | 3.57253964916751  | 3.77019148962354  | 1.22721164124783  |
| H | 2.63795779787692  | 0.73376302079257  | 2.60146336290067  |
| H | 4.10292516702270  | 1.69947011099559  | 2.84912641046764  |
| C | 3.04250967628332  | 1.74879190596905  | 2.57660819121784  |

|   |                   |                   |                   |
|---|-------------------|-------------------|-------------------|
| H | 2.52254833749479  | 2.34806180942406  | 3.33224631469276  |
| H | 4.69875483196046  | 1.49555391412491  | 0.37038110712868  |
| C | 3.63032208993932  | 1.53831925563138  | 0.12976315693648  |
| H | 3.24803771500687  | 0.51466960047668  | 0.09880068781116  |
| H | 3.52044599549579  | 1.98087142081206  | -0.86684849707432 |
| C | -1.01970516653091 | 6.10536625041700  | 1.06675942926178  |
| H | -2.74518575470989 | 4.54651872380919  | -1.50472628752797 |
| H | -3.23378928958784 | 4.73377333284953  | 0.19614546410227  |
| C | -2.60444501975093 | 5.14802050394822  | -0.59960529451334 |
| H | -2.96091468768451 | 6.16101820126351  | -0.81338836009589 |
| H | -0.38531146633161 | 5.21786948120357  | -2.23520100515614 |
| C | -0.32980704076552 | 5.84404553617244  | -1.33761762699094 |
| H | -0.74140292534832 | 6.83082005498774  | -1.57929152974499 |
| H | -2.50279925329638 | -6.29396963427922 | 0.60915079490696  |
| H | -0.93918307264630 | -7.72030748156892 | -0.68440199142443 |
| C | 1.63098118267749  | -2.49344950561093 | 0.25925326013276  |
| C | 1.05914895297414  | -2.50747824965729 | 1.39227118363694  |
| H | 2.45374816677764  | -2.73529781287803 | -0.39197851748421 |
| C | 0.98566554988619  | -2.94880728345349 | 2.76864009633361  |
| C | 0.91138995060099  | -3.87262208064062 | 5.39841395134491  |
| C | 2.01519856965421  | -3.77177010515167 | 3.25446121053516  |
| C | -0.07558850670299 | -2.59480871708519 | 3.60685403478237  |
| H | 2.83805020638315  | -4.04265395396329 | 2.59919337465915  |
| H | 2.76674693925510  | -4.86816039368006 | 4.93589467130654  |
| C | 1.97031550748524  | -4.23048217437046 | 4.56323722018413  |
| C | -0.10872734933203 | -3.05460174649145 | 4.91796720289367  |
| H | 0.88272038566847  | -4.23248377546585 | 6.42280420110525  |
| H | -0.87547891663934 | -1.96424694717730 | 3.22615235066903  |
| H | -0.93460390434553 | -2.77562980881955 | 5.56554073093915  |

### Phosphenium ion 2a + Phenylacetylene IM-I

E[a.u.] (r<sup>2</sup>-SCAN-3c-CPCM(CH<sub>2</sub>Cl<sub>2</sub>): -2360.433425

Gibbs free energy correction (kcal mol<sup>-1</sup>): 457.99

E[a.u.] (PW6B95-D4/def2-QZVPP-SMD(CH<sub>2</sub>Cl<sub>2</sub>): -2364.548414

|   |                   |                   |                   |
|---|-------------------|-------------------|-------------------|
| C | -4.31504043711285 | 0.28337353995636  | 0.02977048122435  |
| C | -4.98113232712984 | -0.87672931174878 | 0.43270742878012  |
| H | -7.22144151322850 | -6.16938093488520 | -1.29025138253937 |
| C | -4.22566194409040 | -2.00335710625633 | 0.72978520690792  |
| H | -6.06082097782155 | -0.91642704049012 | 0.51000354356679  |
| C | -2.12759620312763 | -0.85346841907800 | 0.23541620804089  |
| C | -0.60061428877209 | -0.84006076069098 | 0.14835726411645  |
| C | -5.07155907476337 | 1.56288083872460  | -0.33899589373546 |
| C | -2.91454797731666 | 0.27245566619246  | -0.04300507640508 |



---

|   |                   |                   |                   |
|---|-------------------|-------------------|-------------------|
| H | -2.41123774284947 | 1.18456394313848  | -0.33852470820263 |
| N | -4.67765338827954 | -3.26551604498692 | 1.14937589460157  |
| C | -2.83992651049198 | -1.99172909239457 | 0.60473103051069  |
| O | -2.27106530609923 | -3.23474558681433 | 0.85327764298218  |
| C | -5.99300334043242 | -4.78031228692927 | -0.18608616520431 |
| C | -4.78305146716612 | -3.35045303692708 | -2.77810795641312 |
| P | -3.35216762105755 | -4.49285569301577 | 1.06930343133477  |
| P | -4.36783486311741 | -5.24871538269015 | -0.78929300043826 |
| C | -3.02974270297592 | -2.54471796743224 | -4.22621434289128 |
| C | -3.86580089046841 | -4.21993002475966 | -2.18001825868260 |
| H | -5.81621631073691 | -3.32234640854937 | -2.44415311378581 |
| C | -3.70270963669078 | -7.48491088340781 | -2.31127944843710 |
| C | -4.25270523682329 | -7.00954786174923 | -1.11592052178011 |
| H | -5.14326388859713 | -7.53529669098915 | 0.79201342036447  |
| C | -3.60054685840367 | -8.85672827241007 | -2.51519021354814 |
| C | -2.52710113998636 | -4.24468495956300 | -2.59216867363939 |
| C | -2.11845341965370 | -3.41120230580033 | -3.62497884658317 |
| H | -5.06329216691276 | -1.83377404702290 | -4.26954809979856 |
| C | -4.35629876155757 | -2.51271998167256 | -3.80263031836920 |
| H | -2.70203069103277 | -1.88708141106515 | -5.02616068308379 |
| H | -1.81049121556709 | -4.90359487338938 | -2.10723619282173 |
| H | -1.08287440503174 | -3.42851826724366 | -3.95047013499241 |
| C | -4.70182409328053 | -7.90174541175808 | -0.13095545820561 |
| C | -4.03893583515799 | -9.74579256505944 | -1.53729214709850 |
| H | -3.69738815778344 | 2.10757510098944  | -1.96115625612525 |
| C | -4.59167290045468 | -9.26827532690741 | -0.34948153011582 |
| H | -3.17969108863296 | -9.22931607073558 | -3.44409347264082 |
| C | -8.34114560479164 | -3.87547854713285 | 0.96041878855229  |
| C | -8.37944535044084 | -4.90249004704307 | 0.01636970918396  |
| C | -7.20161431322290 | -5.36808872414154 | -0.55674578480395 |
| H | -9.32923532706568 | -5.34222930067334 | -0.27095316849559 |
| C | -5.94796584967813 | -3.75485879040145 | 0.78199143113490  |
| H | -3.36812919473900 | -6.79615324885167 | -3.08081936115096 |
| H | -9.26586458223102 | -3.52141818183602 | 1.40673011055561  |
| C | -7.13393468633727 | -3.30960241880846 | 1.36042126214812  |
| H | -7.10376649250925 | -2.53952479787498 | 2.12534315115049  |
| H | -0.41493159499110 | 0.86793205040927  | -1.21319679943741 |
| H | -0.34294279334568 | 1.30586858126206  | 0.51053414165247  |
| H | 1.03162450607496  | 0.50194980166425  | -0.26260224366657 |
| H | -4.81475525209086 | 2.47260079280395  | 1.62829108375390  |
| H | -3.54610913766608 | 2.91834893857426  | 0.47118071411215  |
| H | -5.16140882637187 | 3.63092924743583  | 0.32568148278961  |
| C | -0.06193277572982 | 0.54634777067250  | -0.22725188141996 |
| H | -0.29822045037180 | -2.23227167389962 | 1.82123511876414  |

---

|   |                   |                    |                   |
|---|-------------------|--------------------|-------------------|
| H | 1.08808929817148  | -1.18582940251317  | 1.46803053618913  |
| C | -0.00612694086640 | -1.22371535065040  | 1.51843418279909  |
| H | -0.33806302414783 | -0.52047986513409  | 2.29036273558433  |
| H | 0.96573931997225  | -1.81976806045767  | -0.98981984852597 |
| C | -0.12853087383807 | -1.83747041750682  | -0.92661797308460 |
| H | -0.44236920161411 | -2.85950262341920  | -0.70049452517453 |
| H | -0.53450436841708 | -1.56269304681640  | -1.90617657191658 |
| C | -4.61603380016565 | 2.71411018243779   | 0.57806019171463  |
| H | -6.98099127408721 | 0.61967103238830   | -0.84902792420365 |
| H | -6.87329195319686 | 1.16718518273603   | 0.84056700352586  |
| C | -6.58931280262369 | 1.40367732762569   | -0.19107008666105 |
| H | -7.07895642305128 | 2.34413710853320   | -0.46487253114694 |
| H | -5.07397765849803 | 1.11321389321860   | -2.47467778301099 |
| C | -4.76529360249325 | 1.92471431679945   | -1.80551241352173 |
| H | -5.30998451764385 | 2.83272515393350   | -2.08956897876289 |
| H | -4.94094596499859 | -9.96176208160241  | 0.40941601376574  |
| H | -3.95527115433282 | -10.81601925165427 | -1.70247512771832 |
| C | -2.32688566143645 | -5.73831695595031  | 1.74615333230765  |
| C | -3.55369405952916 | -5.69888861886537  | 2.33010815349424  |
| H | -1.38237382024503 | -6.25545375729678  | 1.89778923285140  |
| C | -4.27147835012646 | -6.33083192309796  | 3.41943524392913  |
| C | -5.65094961231106 | -7.60789079828525  | 5.47999160419486  |
| C | -3.61734811582127 | -7.27347105523239  | 4.22774788984664  |
| C | -5.62116314960449 | -6.03461407310697  | 3.65330525755627  |
| H | -2.57034389126399 | -7.50235387901416  | 4.04584623571189  |
| H | -3.79889227414179 | -8.63800016798926  | 5.87458512748672  |
| C | -4.30693182815322 | -7.90804130317435  | 5.25106884745996  |
| C | -6.30542964206138 | -6.67172974721960  | 4.68159714299263  |
| H | -6.18754646250795 | -8.10621279642075  | 6.28243248808160  |
| H | -6.12876907498911 | -5.30906583825770  | 3.02388763835221  |
| H | -7.35141500786493 | -6.43990069874484  | 4.85974449416735  |

**Phosphenium ion 2a + Phenylacetylene TS-II**

E[a.u.] (r<sup>2</sup>-SCAN-3c-CPCM(CH<sub>2</sub>Cl<sub>2</sub>): -2360.406422

Gibbs free energy correction (kcal mol<sup>-1</sup>): 456.97

E[a.u.] (PW6B95-D4/def2-QZVPP-SMD(CH<sub>2</sub>Cl<sub>2</sub>): -2364.523232

|   |                   |                   |                   |
|---|-------------------|-------------------|-------------------|
| C | -4.09908288266914 | 0.69893603260193  | 0.27805781583712  |
| C | -4.73219657076650 | -0.49358260238735 | 0.63713809864217  |
| H | -7.22732339845013 | -5.86860232433900 | -0.97463076461097 |
| C | -3.95637617567028 | -1.63391179074151 | 0.79000766545278  |
| H | -5.80267305876930 | -0.53544023631547 | 0.77846416111165  |
| C | -1.90547299793143 | -0.43256264278827 | 0.19396376952798  |
| C | -0.40208949728320 | -0.42324229731835 | -0.08400695180398 |

|   |                   |                   |                   |
|---|-------------------|-------------------|-------------------|
| C | -4.88520665702353 | 2.00031782326535  | 0.09498249365066  |
| C | -2.71183313310761 | 0.70500501480266  | 0.07620884609349  |
| H | -2.23809403165256 | 1.63808609059913  | -0.20170821283969 |
| N | -4.38285095649711 | -2.94979093939923 | 1.12004603954250  |
| C | -2.58237584315197 | -1.58955353252620 | 0.56571868003090  |
| O | -1.97818334898135 | -2.84091368504367 | 0.71404379749053  |
| C | -5.84600618506897 | -4.56155978088214 | 0.03878108626814  |
| C | -4.53770703009485 | -5.56196732718590 | -3.23445248978418 |
| P | -3.07715849399863 | -4.05690211601488 | 0.90196786275090  |
| P | -4.28339880573354 | -5.32716889072426 | -0.45764344566221 |
| C | -3.71536948532598 | -3.94567915267780 | -4.82722739113125 |
| C | -3.99464984840560 | -4.80427259372561 | -2.18871305181059 |
| H | -5.06665543702106 | -6.48818756372769 | -3.02661107440403 |
| C | -3.06591852386901 | -7.70137126822051 | -1.07821398677563 |
| C | -4.21513743910388 | -7.12640838007445 | -0.51996578191779 |
| H | -6.13020390661106 | -7.49219429539450 | 0.42306670291436  |
| C | -2.94642554153078 | -9.08518900149759 | -1.11936550185358 |
| C | -3.31497421492344 | -3.61682644459309 | -2.47272427993317 |
| C | -3.17501601276489 | -3.19064947066664 | -3.78978623889062 |
| H | -4.81711645021807 | -5.72056591177506 | -5.35600315876776 |
| C | -4.39700733847071 | -5.12876578716284 | -4.54807402450980 |
| H | -3.60166640829888 | -3.61481699850823 | -5.85557951191593 |
| H | -2.87698516884915 | -3.01290121277128 | -1.68227819015563 |
| H | -2.63817653003266 | -2.27088093842520 | -4.00192676946736 |
| C | -5.24350939854236 | -7.93123473211735 | -0.01962905559897 |
| C | -3.97354520826860 | -9.89080526707776 | -0.63136261412224 |
| H | -3.63894919735578 | 2.72766833712654  | -1.56003564360327 |
| C | -5.12059760591901 | -9.31379719055587 | -0.09106091028996 |
| H | -2.05253047652528 | -9.53358997543293 | -1.54226251081686 |
| C | -8.08767577286784 | -3.31081424765146 | 1.08816810392519  |
| C | -8.23779037987168 | -4.38801813525319 | 0.22023302055351  |
| C | -7.11371396202537 | -5.01927045896113 | -0.30712331909971 |
| H | -9.22786649980940 | -4.75172483883150 | -0.03543962213825 |
| C | -5.69645512325696 | -3.42857183064748 | 0.86748666694785  |
| H | -2.27255917491323 | -7.07512275039910 | -1.47794681186832 |
| H | -8.96318719937805 | -2.83873282976905 | 1.52350588034395  |
| C | -6.82277171611758 | -2.82661118895706 | 1.41688267960180  |
| H | -6.71463813474292 | -2.00265913442697 | 2.11396124318351  |
| H | -0.38106398897933 | 1.35489108084160  | -1.36553298464123 |
| H | -0.07329520407137 | 1.69822299393329  | 0.35398724929928  |
| H | 1.17518828165534  | 0.93097484246164  | -0.63865346723353 |
| H | -4.48067214582200 | 2.70238549947826  | 2.12231245255822  |
| H | -3.30222657852540 | 3.27513455303412  | 0.92579552752132  |
| H | -4.92419819537029 | 3.98623896001279  | 0.97622092805789  |

---

|   |                   |                    |                   |
|---|-------------------|--------------------|-------------------|
| C | 0.09710115503596  | 0.97899804131936   | -0.45451649406254 |
| H | 0.10767684857649  | -1.90688758225519  | 1.45688485543775  |
| H | 1.44205034135504  | -0.84605524377434  | 0.97564791037324  |
| C | 0.36460652033491  | -0.88402162150037  | 1.17161325832534  |
| H | 0.14699863851678  | -0.22276391041744  | 2.01756231581938  |
| H | 0.97755563231366  | -1.33185938243620  | -1.49136607344794 |
| C | -0.09447204030838 | -1.36458650116053  | -1.26658798632760 |
| H | -0.36308242867107 | -2.40091389316531  | -1.04643406350216 |
| H | -0.64202352427145 | -1.04683832241772  | -2.16114410172114 |
| C | -4.36108997447290 | 3.05300255529638   | 1.09112633726458  |
| H | -6.82628277168809 | 1.09366502948607   | -0.36111663986818 |
| H | -6.59362601830598 | 1.47673652817203   | 1.36183599332594  |
| C | -6.38727386097275 | 1.81303811254726   | 0.33944670577853  |
| H | -6.89625516994150 | 2.77152950916281   | 0.19514113591301  |
| H | -5.04654806871934 | 1.77520630482946   | -2.07062661162569 |
| C | -4.69059409600274 | 2.51479134019710   | -1.34460110177772 |
| H | -5.25894703596366 | 3.44077262770295   | -1.48839258835853 |
| H | -5.92461307998723 | -9.94035310435408  | 0.28333538134281  |
| H | -3.88066906996225 | -10.97208323416848 | -0.67577626468457 |
| C | -2.68618663719630 | -5.17432716503902  | 2.17894989408092  |
| C | -3.86019375254975 | -5.77704417740226  | 2.01186552319158  |
| H | -1.90253978711892 | -5.13058641447603  | 2.93353904979682  |
| C | -4.60213882742824 | -6.72723744903509  | 2.80579161003829  |
| C | -6.03483521328866 | -8.66111343228331  | 4.23402150337160  |
| C | -3.95318847135654 | -7.87295611438535  | 3.29770634427377  |
| C | -5.97671969053499 | -6.56296971719743  | 3.03989818368221  |
| H | -2.89276895619544 | -8.01123530160868  | 3.10414979051082  |
| H | -4.16619940379669 | -9.72770769526942  | 4.35347332506470  |
| C | -4.67282724301204 | -8.83655314152241  | 3.99316442553945  |
| C | -6.67924720120550 | -7.51643488201313  | 3.76580843454061  |
| H | -6.59231199543583 | -9.41431742111186  | 4.78320224230990  |
| H | -6.48474984462918 | -5.68281796288123  | 2.65499617489127  |
| H | -7.73943592013459 | -7.37288484202796  | 3.95476052484432  |

**Phosphenium ion 2a + Phenylacetylene 3a**

E[a.u.] (r<sup>2</sup>-SCAN-3c-CPCM(CH<sub>2</sub>Cl<sub>2</sub>): -2360.481064

Gibbs free energy correction (kcal mol<sup>-1</sup>): 458.29

E[a.u.] (PW6B95-D4/def2-QZVPP-SMD(CH<sub>2</sub>Cl<sub>2</sub>): -2364.593956

|   |                   |                  |                   |
|---|-------------------|------------------|-------------------|
| C | -3.82472729964831 | 0.91791993321708 | 0.45499112643273  |
| C | -2.60996346737513 | 1.15218363611300 | -0.19472420189522 |
| H | 3.04478860840287  | 2.55140341020428 | -2.00516868931484 |
| C | -1.98893271292000 | 0.08711849157071 | -0.83106989503977 |
| H | -2.14397234343186 | 2.13090203944629 | -0.21221220436266 |

|   |                   |                   |                   |
|---|-------------------|-------------------|-------------------|
| C | -3.73661024084826 | -1.47767052379804 | -0.16515394570762 |
| C | -4.33006308421999 | -2.88648626367982 | -0.14272683956292 |
| C | -4.60223801729241 | 2.03911481272226  | 1.15083202220925  |
| C | -4.34711200357778 | -0.38274093256563 | 0.46326943093171  |
| H | -5.28297830519009 | -0.55322889814058 | 0.98087484811544  |
| N | -0.75606868276865 | 0.11049178778079  | -1.51100580009016 |
| C | -2.54361028784167 | -1.19030983556235 | -0.82295726885749 |
| O | -1.81888730381565 | -2.11550812125210 | -1.57595591416278 |
| C | 1.23937720921722  | 1.39942983987103  | -1.69573576512069 |
| C | 0.12171995885769  | 0.10218940771562  | 1.94869381928395  |
| P | -0.38512578457765 | -1.46837416571050 | -2.16363277068249 |
| P | 1.80868847613575  | 0.45323085219281  | -0.25526186568388 |
| C | -0.78389538586541 | 1.94105487342566  | 3.21970450656454  |
| C | 0.78395953398693  | 1.01412295610389  | 1.12359816499472  |
| H | 0.20180061194775  | -0.96633487554053 | 1.77171732290289  |
| C | 3.95588644401058  | 1.63063406808439  | 1.11204707068888  |
| C | 3.54044003889231  | 0.90153480822893  | -0.00243131936803 |
| H | 4.14737314768231  | -0.11008061308260 | -1.82024258599447 |
| C | 5.30688035387451  | 1.92431631913041  | 1.27220405488335  |
| C | 0.64433292459516  | 2.39271644527825  | 1.33021982401548  |
| C | -0.13478979215639 | 2.84937703473217  | 2.38508118972712  |
| H | -1.18242271756167 | -0.13460929496081 | 3.63587162250851  |
| C | -0.66233882441955 | 0.57276877077317  | 2.99713084396102  |
| H | -1.39502676878758 | 2.30414344538524  | 4.04100815192452  |
| H | 1.13953230881995  | 3.10460873680306  | 0.67434371507796  |
| H | -0.23981479778853 | 3.91724002126305  | 2.55120434665076  |
| C | 4.47000496709718  | 0.46432784440333  | -0.95451058127035 |
| C | 6.23384209240007  | 1.49072429565079  | 0.32903634369903  |
| H | -5.34481979875243 | 0.76817767419230  | 2.77893861232795  |
| C | 5.81547341888048  | 0.76213224210468  | -0.78399778601588 |
| H | 5.63339708585267  | 2.48744802729845  | 2.14116981295291  |
| C | 0.01694894587618  | 3.21087764719531  | -3.40519748765376 |
| C | 1.37851334249541  | 3.32622360613535  | -3.12405637692841 |
| C | 1.99703030040752  | 2.42929645286674  | -2.25988268290191 |
| H | 1.95876382131884  | 4.13055736338482  | -3.56498277189152 |
| C | -0.11539843647701 | 1.25322187107832  | -2.02803528065411 |
| H | 3.23961503440731  | 1.95402275101173  | 1.86104598220556  |
| H | -0.45835988124302 | 3.92404749343209  | -4.07228537694050 |
| C | -0.73668735889306 | 2.17292029956979  | -2.86573122717077 |
| H | -1.78785740654111 | 2.05476188591254  | -3.11172014556284 |
| H | -6.40805498740685 | -2.30577164723929 | 0.24148121612429  |
| H | -6.00271998901888 | -3.97575849852141 | 0.66241300267133  |
| H | -5.47086087488902 | -2.65476361340442 | 1.71399711500660  |
| H | -5.88636930250202 | 2.41470703900027  | -0.57449942534412 |

|   |                   |                   |                   |
|---|-------------------|-------------------|-------------------|
| H | -6.57196177974860 | 1.25652843617472  | 0.58132367403474  |
| H | -6.55226945227667 | 2.98546694263734  | 0.97141199764838  |
| C | -5.62953676923612 | -2.94640113244340 | 0.66992847622829  |
| H | -5.36487648938236 | -2.65317566419105 | -2.04848646422854 |
| H | -3.75238194051975 | -3.37974342166081 | -2.20432245027647 |
| C | -4.64921322354239 | -3.33915594591350 | -1.58177402582652 |
| H | -5.09709374613561 | -4.33930158916986 | -1.56089279383627 |
| H | -3.75032054977172 | -4.86518157195656 | 0.53808535694624  |
| C | -3.32118285633179 | -3.85730441438969 | 0.50342562295289  |
| H | -2.38525474801100 | -3.90443993783082 | -0.05880653147669 |
| H | -3.09445708933588 | -3.54575472641951 | 1.52929484372483  |
| C | -5.98809543143099 | 2.17782540700685  | 0.49057743590311  |
| H | -4.48258245943860 | 4.15479464016379  | 1.55759237850502  |
| H | -2.90025258757058 | 3.36111947301968  | 1.52766702803033  |
| C | -3.88550340448864 | 3.39035433885402  | 1.04942278841608  |
| H | -3.75767420294227 | 3.70361524091450  | 0.00707272343033  |
| H | -3.80667231153379 | 1.57815218192456  | 3.12977424778009  |
| C | -4.78065563815062 | 1.69600728861904  | 2.64213236740957  |
| H | -5.32576343965393 | 2.50095052459005  | 3.14871215862002  |
| H | 6.53868286632384  | 0.42192452704274  | -1.51887647393597 |
| H | 7.28778404221481  | 1.71771559312206  | 0.46115723404676  |
| C | 0.82641602006221  | -2.09268615913491 | -0.94071064393385 |
| C | 1.77661956065287  | -1.39243172016597 | -0.29988216474076 |
| H | 0.88473229520827  | -3.18373908927136 | -0.88936188551763 |
| C | 4.27478015130098  | -2.38713088614445 | 2.37652403659517  |
| H | 3.32789723779382  | -3.35317605420113 | -1.24883423001380 |
| C | 2.87961865767015  | -2.07086244764467 | 0.42365739494958  |
| C | 4.61935233742148  | -3.75634504037593 | 0.42399515460650  |
| H | 5.78296554083163  | -3.91795210126772 | 2.22950870044112  |
| C | 3.24153744036604  | -1.71888706616355 | 1.73046234306907  |
| C | 4.96938171651178  | -3.40446499052322 | 1.72542744628493  |
| H | 4.53761034872902  | -2.11045832477732 | 3.39338391148855  |
| C | 3.58255989628268  | -3.09545063103903 | -0.22447135127348 |
| H | 2.70997729317824  | -0.93175734187336 | 2.25775682877850  |
| H | 5.16148334060480  | -4.54224076233209 | -0.09396626151346 |

**Phosphenium ion 2a + Phenylacetylene 3a'**

E[a.u.] ( $r^2$ -SCAN-3c-CPCM( $\text{CH}_2\text{Cl}_2$ ): -2360.486624

Gibbs free energy correction ( $\text{kcal mol}^{-1}$ ): 458.3

E[a.u.] (PW6B95-D4/def2-QZVPP-SMD( $\text{CH}_2\text{Cl}_2$ ): -2364.599747

|   |                   |                   |                   |
|---|-------------------|-------------------|-------------------|
| C | 2.97882036111692  | -2.07153578518072 | 0.10204043716866  |
| C | 1.71679958665325  | -1.89033374639086 | -0.47040097789026 |
| H | -4.17850439080204 | -1.57909865252219 | -1.81460557409078 |

|   |                   |                   |                   |
|---|-------------------|-------------------|-------------------|
| C | 1.37342725608534  | -0.62067191524005 | -0.91300800848989 |
| H | 1.00658505441780  | -2.70321172944034 | -0.57230971344757 |
| C | 3.50490697987789  | 0.32900104616958  | -0.20023601786995 |
| C | 4.44310926241789  | 1.52551954357336  | -0.03966287270763 |
| C | 3.45845256740492  | -3.44229789440899 | 0.58887110993614  |
| C | 3.82765696682553  | -0.96331804257628 | 0.23705322306125  |
| H | 4.79309600232543  | -1.11396344721510 | 0.70402487223986  |
| N | 0.14855307275411  | -0.22119525941848 | -1.48348449467573 |
| C | 2.25446172435998  | 0.45159242685055  | -0.79873158466518 |
| O | 1.77744653215036  | 1.62209180614422  | -1.39149627751724 |
| C | -2.11917483560007 | -0.95812707094412 | -1.58789205734778 |
| C | -0.61855518982431 | -0.77287614653809 | 2.18806176949649  |
| P | 0.16628863258383  | 1.48808147257295  | -1.82551637199030 |
| P | -2.28975935001617 | -0.17269365005456 | 0.03541789699604  |
| C | -0.21894418048657 | -3.01706763157351 | 2.97724586684381  |
| C | -1.46256487492947 | -1.28375233698288 | 1.19929629574935  |
| H | -0.43571782314847 | 0.29479739010333  | 2.26100053314046  |
| C | -4.62980541752295 | -0.83871250055891 | 1.42639885542160  |
| C | -4.05437413945686 | -0.07475824891602 | 0.40971393159298  |
| H | -4.38432121165693 | 1.40486521918488  | -1.13806701503671 |
| C | -5.99350688157429 | -0.72069660682393 | 1.68103952714778  |
| C | -1.67832513946473 | -2.66282501764043 | 1.09036951011906  |
| C | -1.05886720811823 | -3.52404422786623 | 1.98705021989642  |
| H | 0.66688114979346  | -1.25247880136549 | 3.83833543915497  |
| C | 0.00351983741616  | -1.64650004844754 | 3.07433871540374  |
| H | 0.27037656071909  | -3.69577260709924 | 3.67003739428668  |
| H | -2.32253785240393 | -3.06332062746933 | 0.31159513030964  |
| H | -1.22551567219135 | -4.59397338744024 | 1.90600050041947  |
| C | -4.83496286643689 | 0.80773837677503  | -0.34815023037661 |
| C | -6.77317738778080 | 0.15161775784381  | 0.92730466898660  |
| H | 1.48583210697919  | -4.34414787174442 | 0.87744032502737  |
| C | -6.19470693589809 | 0.91568764674519  | -0.08571595769735 |
| H | -6.44423263718037 | -1.31138536483541 | 2.47279111174453  |
| C | -1.56556928776590 | -2.65310982639685 | -3.71053088361378 |
| C | -2.87789682636772 | -2.50313104313135 | -3.26208514159705 |
| C | -3.16348166271875 | -1.66246793395419 | -2.19114380791345 |
| H | -3.68161457599139 | -3.05582796196997 | -3.73817971607844 |
| C | -0.81091235884138 | -1.06915393936087 | -2.07767934019525 |
| H | -4.02339218291603 | -1.51572726519742 | 2.02036524594750  |
| H | -1.35281112693312 | -3.32036624230367 | -4.54059903545710 |
| C | -0.52570716776824 | -1.93331633818786 | -3.12830797451011 |
| H | 0.49197285262469  | -2.01565538737413 | -3.49859872491104 |
| H | 3.95180105577300  | 2.43105089735907  | -1.97982933590090 |
| H | 5.51881057073435  | 2.91825183052374  | -1.30933455567548 |

|   |                   |                   |                   |
|---|-------------------|-------------------|-------------------|
| H | 5.32351458906275  | 1.30423349282600  | -2.02340851778371 |
| H | 4.52704696016108  | -2.64928188221452 | 2.33350389641341  |
| H | 2.84101506107657  | -3.09995283133018 | 2.65324691364959  |
| H | 4.07991007171938  | -4.35989364184814 | 2.45998713273531  |
| C | 4.82572474223791  | 2.07742092865655  | -1.42761959632389 |
| H | 2.83266163652972  | 2.98538017131475  | 0.29008671490867  |
| H | 3.46071597079988  | 2.24016464416026  | 1.77371693524508  |
| C | 3.73748781926789  | 2.62238357176797  | 0.78452182223053  |
| H | 4.41568121478240  | 3.47230086021542  | 0.92276912402931  |
| H | 5.53621978479207  | 0.75704807376118  | 1.69673851118533  |
| C | 5.73605724633477  | 1.14171533007892  | 0.69055522396421  |
| H | 6.30968692013978  | 0.39090497713545  | 0.13618580845238  |
| H | 6.36294145941835  | 2.03381030006033  | 0.79076149482269  |
| C | 3.74539890958135  | -3.37950421624260 | 2.10122421643505  |
| H | 5.09397670472552  | -4.81134269953706 | 0.16797286355616  |
| H | 4.57241730412395  | -3.86197974577780 | -1.24112769975966 |
| C | 4.75015544293793  | -3.82366681166111 | -0.16049682931846 |
| H | 5.55464290563524  | -3.10606207690033 | 0.02806727801207  |
| H | 2.19125735623309  | -4.64807127642119 | -0.72694663803502 |
| C | 2.41947435574244  | -4.54152808671766 | 0.33965468729314  |
| H | 2.81459225399165  | -5.49891253010262 | 0.69518661346018  |
| H | -6.80317398148945 | 1.59790728028666  | -0.67158887811437 |
| H | -7.83656235424900 | 0.24027480414475  | 1.13041257144942  |
| C | -0.65235548922255 | 2.14017252710574  | -0.27480993019739 |
| C | -1.67607496670868 | 1.49712531570808  | 0.31195126358207  |
| C | -0.18632341445958 | 3.45452561713748  | 0.18579306589110  |
| H | -2.22943927134756 | 1.98060327220216  | 1.12010733598282  |
| C | 0.69711821315230  | 5.66215192471997  | -0.27913474141235 |
| C | 0.43778052287191  | 4.92790650540490  | 2.00373394901814  |
| H | 0.10583307885338  | 4.27164335667378  | -1.79984164891728 |
| C | 0.20778043329746  | 4.44259545850740  | -0.73064319005454 |
| C | 0.81675772531606  | 5.90735685612234  | 1.08720666335654  |
| H | 0.53983460763709  | 5.11032417866499  | 3.06962922218855  |
| C | -0.06075870237767 | 3.71003782118223  | 1.55974682051579  |
| H | 0.98607820150568  | 6.42376226086068  | -0.99741364171850 |
| H | 1.20870221849626  | 6.85797620219376  | 1.43716431021537  |
| H | -0.32601172578754 | 2.93714653058545  | 2.27594234960737  |

**Phosphenium ion 2a + Styrene TS-Ia**

E[a.u.] (r<sup>2</sup>-SCAN-3c-CPCM(CH<sub>2</sub>Cl<sub>2</sub>): -2361.664328

Gibbs free energy correction (kcal mol<sup>-1</sup>): 471.98

E[a.u.] (PW6B95-D4/def2-QZVPP-SMD(CH<sub>2</sub>Cl<sub>2</sub>): -2365.774743

|   |                  |                  |                  |
|---|------------------|------------------|------------------|
| C | 4.49498233868993 | 0.73737919416023 | 0.75331673078107 |
|---|------------------|------------------|------------------|



---

|   |                   |                   |                   |
|---|-------------------|-------------------|-------------------|
| C | 3.16394060232962  | 1.02392128838085  | 1.02661616858239  |
| H | -2.77317183132153 | 2.70235944052343  | 2.01552648775472  |
| C | 2.21557536495776  | 0.03611132710874  | 0.75794676159653  |
| H | 2.85594609769377  | 1.97983275730804  | 1.42955870230644  |
| C | 3.90769517818049  | -1.51150207784669 | -0.11401955004283 |
| C | 4.29155724301053  | -2.85312892604516 | -0.73363245003962 |
| C | 5.61270342632643  | 1.74385814329033  | 1.03278015718378  |
| C | 4.83215915951725  | -0.52033699830606 | 0.20518177381455  |
| H | 5.87837716930156  | -0.72082675644045 | 0.01035355936312  |
| N | 0.83328983203274  | 0.08627237312679  | 0.92264564856835  |
| C | 2.57938007607060  | -1.18351646595114 | 0.18291049821928  |
| O | 1.49503319887054  | -1.96416394333406 | -0.08067883595895 |
| C | -1.10609325996354 | 1.48659355198849  | 1.41463024350661  |
| C | -1.88457705082900 | 3.47943475108831  | -1.15507483729030 |
| P | -0.01262894546578 | -1.25652522661577 | 0.22811065642609  |
| P | -1.78746767999727 | 0.83579612692720  | -0.15046967088004 |
| C | -0.60616907577243 | 4.23212857445327  | -3.05954938197781 |
| C | -1.37506114444178 | 2.18531177460017  | -1.32316652534112 |
| H | -2.57985635691304 | 3.69631470712069  | -0.34857029522686 |
| C | -4.46039787863208 | 1.44741852767195  | -0.82133162304114 |
| C | -3.58999104318543 | 0.86313313804127  | 0.10302242378056  |
| H | -3.44687755377078 | -0.30471817365366 | 1.91937977904088  |
| C | -5.83724211638743 | 1.36795837871044  | -0.62773369839720 |
| C | -0.46802320543310 | 1.93008375059057  | -2.35487408924266 |
| C | -0.08399926010765 | 2.95285450986314  | -3.21986322159467 |
| H | -1.91121040041909 | 5.49329035614384  | -1.89575207827847 |
| C | -1.50633708071477 | 4.49374691882466  | -2.02635587637566 |
| H | -0.31034878719287 | 5.02915484700175  | -3.73587544808445 |
| H | -0.04746053597811 | 0.93683582402087  | -2.48171593494092 |
| H | 0.62366845094566  | 2.74611754560170  | -4.01737360888032 |
| C | -4.11375863897286 | 0.17011347484411  | 1.20325205796261  |
| C | -6.35382840882096 | 0.69609361872014  | 0.47550608327702  |
| H | 6.08505834622000  | 0.89337854323183  | 2.98799984390214  |
| C | -5.48849923407228 | 0.09356995851102  | 1.38799014419539  |
| H | -6.50590103810201 | 1.83238006378266  | -1.34706132968560 |
| C | 0.08093064088668  | 2.30034043205362  | 3.80538429305242  |
| C | -1.18242413880212 | 2.77469953205416  | 3.46029331472689  |
| C | -1.77642766254420 | 2.35672279654625  | 2.27479603380558  |
| H | -1.70960696302204 | 3.45820176084801  | 4.11876918299518  |
| C | 0.17281914528010  | 1.03241279856598  | 1.76351029149286  |
| H | -4.07025079180785 | 1.96545548879475  | -1.69239627999405 |
| H | 0.54075823587628  | 2.60103972943407  | 4.74203590904875  |
| C | 0.75778228751142  | 1.42080919666394  | 2.96919629831922  |
| H | 1.72055393578769  | 1.01817957927082  | 3.26506949226768  |

---

|   |                   |                   |                   |
|---|-------------------|-------------------|-------------------|
| H | 6.19597652738985  | -2.20735374671512 | -1.60446179053630 |
| H | 6.34514235591647  | -2.90561152049409 | 0.02645396131560  |
| H | 6.03024994031666  | -3.95267383348514 | -1.36506845390609 |
| H | 4.56215377883608  | 2.90225624594887  | 2.56523590932707  |
| H | 5.91593489274018  | 3.73866709361526  | 1.79227265458931  |
| H | 4.38833217666202  | 3.55551016500107  | 0.91838833267848  |
| C | 5.80797156352844  | -2.97490205258952 | -0.92590138515943 |
| H | 2.74767730111475  | -4.01074545140872 | 0.31968623801666  |
| H | 4.13565095012692  | -4.95903863345640 | -0.23888356143454 |
| C | 3.83293731272788  | -3.99811348772763 | 0.19183015071339  |
| H | 4.29798187711346  | -3.90305692067095 | 1.17922263671349  |
| H | 3.92006432915736  | -3.94183156336747 | -2.57246215994493 |
| C | 3.61986894666381  | -2.99256624317487 | -2.11478276316782 |
| H | 2.52965231824292  | -2.98147080164443 | -2.04016266027737 |
| H | 3.93161670150334  | -2.17800988355491 | -2.77784139174637 |
| C | 5.07733901425552  | 3.05881202517456  | 1.61069486068578  |
| H | 6.81876473400326  | 1.16351124859488  | -0.70989547842454 |
| H | 5.67281877471879  | 2.48282267407739  | -1.02095161294442 |
| C | 6.35807500261687  | 2.05794562918518  | -0.27906415797178 |
| H | 7.15355035785389  | 2.78669115736898  | -0.08667703886218 |
| H | 7.06045460283155  | 0.21766414522834  | 1.66814589944788  |
| C | 6.59744260390603  | 1.13312770387075  | 2.04963547260329  |
| H | 7.39700321940803  | 1.85057832549380  | 2.26637624700640  |
| H | -5.88555644826633 | -0.44014373984393 | 2.24683084110802  |
| H | -7.42837463190862 | 0.63549490342289  | 0.62319129206897  |
| C | -0.49443665110077 | -1.92345218137537 | -1.98746211468034 |
| C | -1.78540446210206 | -1.49408768394343 | -2.19712253507055 |
| H | -4.02789265634461 | -4.56530728956077 | 0.46007432625621  |
| C | -5.39564725923806 | -2.23067576131337 | -1.60101789943816 |
| H | -1.95641211915802 | -3.58329448493060 | -0.42215605665054 |
| C | -2.96975744030301 | -2.13116583370684 | -1.68044735030902 |
| C | -4.08196659814418 | -3.75222084564666 | -0.25805007136278 |
| H | -6.23585355907272 | -3.72099724065368 | -0.29100751874089 |
| C | -4.23289521247526 | -1.65738231528873 | -2.08835663956396 |
| C | -5.32423547946002 | -3.27674370833140 | -0.68054486026819 |
| H | -6.36181400227178 | -1.85626002388122 | -1.92593714310116 |
| C | -2.91372213252027 | -3.19396896176436 | -0.75467689649807 |
| H | -4.28441032050810 | -0.83138972536277 | -2.79259184506666 |
| H | 0.31859451200595  | -1.43273517456760 | -2.51708020239926 |
| H | -0.30219062260342 | -2.95153005244807 | -1.68826201732408 |
| H | -1.94794784498192 | -0.59368436774903 | -2.78861501837857 |

**Phosphenium ion 2a + Styrene TS-Ib**

E[a.u.] ( $r^2$ -SCAN-3c-CPCM( $\text{CH}_2\text{Cl}_2$ ): -2361.651524

---

Gibbs free energy correction (kcal mol<sup>-1</sup>): 471.43

E[a.u.] (PW6B95-D4/def2-QZVPP-SMD(CH<sub>2</sub>Cl<sub>2</sub>)): -2365.760794

|   |                   |                   |                   |
|---|-------------------|-------------------|-------------------|
| C | 3.12019158164592  | -2.18387716994439 | 0.09139941743493  |
| C | 1.87891783155484  | -1.90546800947745 | -0.46722005641941 |
| H | -3.86403987055513 | -1.75618838294491 | -1.87247184381085 |
| C | 1.53529690478527  | -0.56768166835981 | -0.63183251745065 |
| H | 1.18377185021002  | -2.68139673070019 | -0.76473396355441 |
| C | 3.63810961938537  | 0.23587774372140  | 0.32709029457610  |
| C | 4.55800366939687  | 1.37567090646760  | 0.75625020126208  |
| C | 3.60422459515399  | -3.61758587037677 | 0.31403380051995  |
| C | 3.96218504831380  | -1.11335158162394 | 0.46541739874394  |
| H | 4.92597420877778  | -1.35745866663421 | 0.89488487901609  |
| N | 0.34626173284364  | -0.04466817795583 | -1.15140980626100 |
| C | 2.38113520861441  | 0.46630217023861  | -0.23640819456193 |
| O | 1.82243478728960  | 1.70635391967765  | -0.45763674651592 |
| C | -1.91656824195554 | -0.94798858187820 | -1.43116068187295 |
| C | -1.65021254280953 | -2.72007387348200 | 1.20368076086474  |
| P | 0.28537771769972  | 1.65312270351773  | -1.06601819727087 |
| P | -2.25470711934349 | -0.16309250871885 | 0.18674987102656  |
| C | 0.02585992907619  | -3.15191358938094 | 2.88449155107454  |
| C | -1.39456789921870 | -1.34550445673720 | 1.29667762774798  |
| H | -2.39923901447057 | -3.08914469383432 | 0.50718073289762  |
| C | -4.55599753337077 | -1.03755808039106 | 1.57903579011200  |
| C | -4.03942243017377 | -0.36503921972789 | 0.46697660789937  |
| H | -4.52216664347691 | 0.84861837637696  | -1.25963458470841 |
| C | -5.93160214813981 | -1.06870208316735 | 1.79636072467174  |
| C | -0.41060846319504 | -0.88762387861130 | 2.17694228289357  |
| C | 0.29700422976640  | -1.79017536416682 | 2.96827470720950  |
| H | -1.15591230063584 | -4.67984660381600 | 1.92710940802902  |
| C | -0.94785040507619 | -3.61613429458525 | 2.00039836285075  |
| H | 0.57712485999868  | -3.85556540197405 | 3.50193008241484  |
| H | -0.17198686145310 | 0.17023547248674  | 2.23851233145504  |
| H | 1.06544100331575  | -1.42523191629265 | 3.64372608664667  |
| C | -4.91451186811328 | 0.29803223577488  | -0.40684905983739 |
| C | -6.79800904993142 | -0.43295364486770 | 0.91173545280366  |
| H | 5.22966167164101  | -4.88166891667051 | -0.37696306983979 |
| C | -6.28626981013873 | 0.25078562964027  | -0.19077225949240 |
| H | -6.32499303229148 | -1.59564191583266 | 2.66101582942628  |
| C | -1.09487270797703 | -2.20621461648610 | -3.79237172843016 |
| C | -2.42250056576131 | -2.29273362319639 | -3.37412467469064 |
| C | -2.83372536337080 | -1.66678647791373 | -2.20326815707810 |
| H | -3.13983799714548 | -2.86134048963143 | -3.95842492719031 |
| C | -0.59594458436123 | -0.84244950661425 | -1.88395916212785 |

|   |                   |                   |                   |
|---|-------------------|-------------------|-------------------|
| H | -3.88979461410913 | -1.53921063783317 | 2.27453903058590  |
| H | -0.77705603281969 | -2.69294984270506 | -4.70931533009340 |
| C | -0.17502947630909 | -1.47692176391811 | -3.04916437869890 |
| H | 0.85617565157067  | -1.37698423958678 | -3.37557667681642 |
| H | 5.73474968986664  | 0.23318369225954  | 2.20927855572310  |
| H | 6.43812376386131  | 0.26766400713873  | 0.57374307739539  |
| H | 6.50728677030723  | 1.70533369952278  | 1.60373174298819  |
| H | 1.62648973112218  | -4.53698973199577 | 0.48247413871807  |
| H | 2.30595325476772  | -4.58230344272206 | -1.16257036362092 |
| H | 2.94109238483928  | -5.65704222518113 | 0.09080626417009  |
| C | 5.88494617051908  | 0.85156022545422  | 1.31759387034952  |
| H | 3.97255816698133  | 2.74088285785757  | -0.86652137410004 |
| H | 5.56061332848042  | 3.06780811556674  | -0.15503713849155 |
| C | 4.87166719922987  | 2.27201797571114  | -0.45881766613322 |
| H | 5.35022526505948  | 1.68880372920096  | -1.25315559504153 |
| H | 2.93264654657767  | 2.65453191350389  | 1.49957508957122  |
| C | 3.86246696148732  | 2.20344593906978  | 1.85582214129829  |
| H | 3.63351938898559  | 1.57452599247972  | 2.72324523854883  |
| H | 4.52809771301439  | 3.01037072178557  | 2.18195981621324  |
| C | 2.55009641066765  | -4.65183332735081 | -0.09656708164791 |
| H | 4.72816671394175  | -3.15874455159290 | 2.14686740293584  |
| H | 3.04044143170363  | -3.63366571886234 | 2.42240095187840  |
| C | 3.92702198656198  | -3.82224313726757 | 1.80695644645156  |
| H | 4.25177943223295  | -4.85507089706656 | 1.97586565642468  |
| H | 4.66788959730161  | -3.71118700282173 | -1.59054239343706 |
| C | 4.87543225744886  | -3.85512791478487 | -0.52439840912682 |
| H | 5.68285409697768  | -3.17420504230406 | -0.23684791147713 |
| H | -6.95687217936316 | 0.75621667928373  | -0.87976237187341 |
| H | -7.87025066328451 | -0.46321403266954 | 1.08300596449718  |
| C | -0.63622575522828 | 2.89700594691017  | 0.88671288689728  |
| C | -1.80292955345823 | 2.23631517509828  | 1.22147289804694  |
| C | -0.57447317348382 | 4.12177884286823  | 0.07110753381403  |
| H | -2.51157521336361 | 3.91190595985483  | -0.87501741416978 |
| C | 0.70165513819292  | 6.06146268777962  | -0.64677499568109 |
| C | -1.49331594968469 | 5.66840398345709  | -1.55509630728822 |
| H | 1.40339750034664  | 4.60796546380761  | 0.77603893246831  |
| C | 0.58802872572880  | 4.90664077779723  | 0.12094194280117  |
| C | -0.33919204757721 | 6.44962180674831  | -1.48627065413327 |
| H | -2.30637800224512 | 5.95890803704232  | -2.21481754069788 |
| C | -1.61073320482114 | 4.51406305871458  | -0.79152526197894 |
| H | 1.60717847728481  | 6.65888834066384  | -0.58791362405858 |
| H | -0.25200969857467 | 7.34991046164640  | -2.08753366993519 |
| H | -1.84073914138014 | 1.63299631168327  | 2.12173380880856  |
| H | -2.76364305532428 | 2.53990804980251  | 0.81681414705257  |

---

|   |                  |                  |                  |
|---|------------------|------------------|------------------|
| H | 0.23684100946312 | 2.70768689404619 | 1.51164105039891 |
|---|------------------|------------------|------------------|

**Phosphenium ion 2a + Styrene TS-1c**

E[a.u.] (r<sup>2</sup>-SCAN-3c-CPCM(CH<sub>2</sub>Cl<sub>2</sub>): -2361.65704463356

Gibbs free energy correction (kcal mol<sup>-1</sup>): 471.26

E[a.u.] (PW6B95-D4/def2-QZVPP-SMD(CH<sub>2</sub>Cl<sub>2</sub>): -2365.76664752264

|   |                   |                   |                   |
|---|-------------------|-------------------|-------------------|
| C | -3.43892064645044 | -0.73234315932534 | 0.10630889814263  |
| C | -2.19381364201937 | -0.87730864970218 | 0.70573899449566  |
| H | 3.25919875737389  | -2.29420801464522 | 2.97169443198404  |
| C | -1.51128669582965 | 0.28102822328504  | 1.06259815837095  |
| H | -1.74571653484043 | -1.84553467856636 | 0.89286902612546  |
| C | -3.28666649174843 | 1.74455726543655  | 0.23012223521793  |
| C | -3.85908363112114 | 3.13767610272094  | -0.01996748473436 |
| C | -4.26274180657530 | -1.94007129701709 | -0.34301222460779 |
| C | -3.95371704387011 | 0.56562939107993  | -0.10376501385335 |
| H | -4.92880856316737 | 0.65221065592481  | -0.56705585550181 |
| N | -0.24645156054314 | 0.38538578361886  | 1.64949815399045  |
| C | -2.03172377262765 | 1.54921629227205  | 0.81305308889134  |
| O | -1.15883631198831 | 2.54689833490541  | 1.18052908275272  |
| C | 1.67716493207514  | -1.01898119422974 | 2.26601297449044  |
| C | 2.26317386150493  | -2.63629562692757 | -0.54409446045857 |
| P | 0.33092966408076  | 1.99043690115700  | 1.68585890620245  |
| P | 2.54692447161810  | -0.18408528688440 | 0.87851529923320  |
| C | 0.67063478200579  | -2.94620067713591 | -2.33337245952170 |
| C | 1.91191625426871  | -1.28278658877137 | -0.45888387496970 |
| H | 3.00512501975766  | -3.05282047180129 | 0.13221591460340  |
| C | 5.09984288078798  | -1.14905572611416 | 0.11532454168543  |
| C | 4.30468305931823  | -0.60430660389453 | 1.12946280908037  |
| H | 4.31208560767509  | 0.24450073594567  | 3.12125264833151  |
| C | 6.46853966211172  | -1.31817851841285 | 0.31164396191411  |
| C | 0.92484367104924  | -0.77888882182629 | -1.30902075075198 |
| C | 0.30403669430223  | -1.60790008959953 | -2.24117953338699 |
| H | 1.93362595949199  | -4.50599061156124 | -1.54546803204977 |
| C | 1.65251802686883  | -3.45835832381671 | -1.48397337122139 |
| H | 0.18819200587668  | -3.59437557439993 | -3.05973182307245 |
| H | 0.62330389769157  | 0.26100435577731  | -1.23725063623683 |
| H | -0.46662965374520 | -1.20361519142830 | -2.89159911393853 |
| C | 4.90964472543769  | -0.20586575790424 | 2.33120124548810  |
| C | 7.05807448769027  | -0.94362406224232 | 1.51535653867516  |
| H | -2.58714635074128 | -3.32626748028340 | -0.59051679568032 |
| C | 6.27400845219460  | -0.38574525554615 | 2.52475894800282  |
| H | 7.07388285393265  | -1.74664317207220 | -0.48236334255427 |
| C | 0.09290190219199  | -2.28177057337459 | 4.19861706716601  |

|   |                   |                   |                   |
|---|-------------------|-------------------|-------------------|
| C | 1.43326044271794  | -2.63469274650202 | 4.05159059623408  |
| C | 2.21908408640979  | -2.00602837332737 | 3.09254262633220  |
| H | 1.86593726019464  | -3.40730466296013 | 4.68025696207440  |
| C | 0.33328383692359  | -0.66940574051396 | 2.43406988328591  |
| H | 4.65690790561940  | -1.43773324158345 | -0.83272094357808 |
| H | -0.52245615597051 | -2.76608227919083 | 4.95078542883262  |
| C | -0.46074870046806 | -1.29339252813760 | 3.39520390938461  |
| H | -1.49673441369164 | -0.99287987619403 | 3.51988206230651  |
| H | -5.24463717747819 | 2.57594941110524  | -1.62169101414595 |
| H | -5.96850652286301 | 2.54921455699033  | 0.00482141311340  |
| H | -5.62595035603472 | 4.09175635746939  | -0.79232755131214 |
| H | -5.09426318173970 | -2.71231209161369 | -2.19473119280128 |
| H | -5.08059876963067 | -0.94259333996242 | -2.12237398721007 |
| H | -3.56814416025285 | -1.82719938648500 | -2.40894142013328 |
| C | -5.25763408975037 | 3.07152966116073  | -0.64481256467289 |
| H | -2.99145329502082 | 4.03276831682390  | 1.79143765581430  |
| H | -4.40277218523491 | 4.88486138392140  | 1.14428642275392  |
| C | -3.96732298754280 | 3.89475313143757  | 1.31904357769893  |
| H | -4.61647113397925 | 3.35263165019437  | 2.01533765929260  |
| H | -3.36929262974420 | 4.89341075757175  | -1.19484066113403 |
| C | -2.93681318129480 | 3.90854008009083  | -0.98612153497998 |
| H | -1.93975936882898 | 4.05901296573894  | -0.56479972037559 |
| H | -2.83643449289607 | 3.36948562069651  | -1.93469034681125 |
| C | -4.51674620338041 | -1.84320769800620 | -1.86007613399851 |
| H | -6.20254107990159 | -2.81252931713374 | 0.09696096348348  |
| H | -5.44756067969398 | -2.00653821982731 | 1.48909617198743  |
| C | -5.60885097950052 | -1.94517234680866 | 0.40709724415612  |
| H | -6.19393385390808 | -1.04396624097942 | 0.19838227276362  |
| H | -3.36140389719857 | -3.40735168440150 | 1.01048855555726  |
| C | -3.54486739193345 | -3.26479262145487 | -0.06043384157965 |
| H | -4.17167044899185 | -4.09350841549044 | -0.40508256148434 |
| H | 6.72754290783198  | -0.08359834188700 | 3.46452311984836  |
| H | 8.12507400667941  | -1.08015002112769 | 1.66667977844036  |
| C | 1.17764824391921  | 3.07601602290937  | -0.19323434501159 |
| C | 2.47350697169833  | 2.66600804149163  | -0.45232412690225 |
| H | 2.08829542157886  | 1.11383127201751  | -4.81025249247638 |
| C | 4.83855190879191  | 1.00557748071600  | -2.81156552815624 |
| H | 1.14115728449723  | 2.17840564700335  | -2.80975453238273 |
| C | 2.96265093697190  | 2.01639058764182  | -1.64221037716729 |
| C | 2.70636165863611  | 1.24370362875840  | -3.92662346727947 |
| H | 4.45014024043525  | 0.35273334230957  | -4.82733379933791 |
| C | 4.31059926539809  | 1.60388148145791  | -1.67830291075496 |
| C | 4.03697098818005  | 0.81837865594672  | -3.93719725658730 |
| H | 5.87602485247286  | 0.68421849641167  | -2.82026228846758 |

---

|   |                  |                  |                   |
|---|------------------|------------------|-------------------|
| C | 2.17215164344410 | 1.83841505710946 | -2.79622931431711 |
| H | 4.93286738165988 | 1.75204688568020 | -0.79945541033817 |
| H | 1.05916704044906 | 3.96349139638587 | 0.42804710142979  |
| H | 0.39194788870373 | 2.91687718955443 | -0.92886897047103 |
| H | 3.23472623967878 | 2.91922746035188 | 0.28534673677282  |

**Phosphenium ion 2a + Styrene P-a**

E[a.u.] (r<sup>2</sup>-SCAN-3c-CPCM(CH<sub>2</sub>Cl<sub>2</sub>): -2365.829082

Gibbs free energy correction (kcal mol<sup>-1</sup>): 473.31

E[a.u.] (PW6B95-D4/def2-QZVPP-SMD(CH<sub>2</sub>Cl<sub>2</sub>): -2361.708847

|   |                   |                   |                   |
|---|-------------------|-------------------|-------------------|
| C | 3.92847269613415  | 0.93423979089915  | 0.33015638036408  |
| C | 2.60485727326774  | 0.87301766432481  | 0.77381057051622  |
| H | -3.23193204457021 | 1.61552285983951  | 2.21308283880210  |
| C | 1.93419695713539  | -0.34054585847414 | 0.69201785178901  |
| H | 2.09394031870069  | 1.73920671638765  | 1.17753551132193  |
| C | 3.86523786917048  | -1.45847632394567 | -0.29824650318862 |
| C | 4.53317099265225  | -2.70578344362668 | -0.87823589984161 |
| C | 4.74728901356963  | 2.22699388561707  | 0.39644407693132  |
| C | 4.51640470245850  | -0.22055324117127 | -0.20395254588724 |
| H | 5.53606884883209  | -0.15543681365203 | -0.56275675531769 |
| N | 0.59613520684307  | -0.59533314593868 | 1.05230318124953  |
| C | 2.55793998146092  | -1.47788951516567 | 0.18168463422812  |
| O | 1.76414137197906  | -2.62169398201641 | 0.25127887045553  |
| C | -1.43499665023309 | 0.58189956289860  | 1.59300359343138  |
| C | -0.24926908370806 | 2.74077477089682  | -0.35615238609056 |
| P | 0.18356732130721  | -2.26899655600647 | 0.69360240007085  |
| P | -1.82600618441618 | 0.48953229574044  | -0.17491459531760 |
| C | 1.14873812959895  | 3.31905984517109  | -2.23332627528670 |
| C | -0.61245003434219 | 1.55111798086657  | -0.99930846070815 |
| H | -0.64820591405062 | 2.98195564464207  | 0.62558546956125  |
| C | -3.62342167646526 | 2.21340319166152  | -1.40370954646131 |
| C | -3.46969173665866 | 1.19973929312329  | -0.45191967994896 |
| H | -4.48702276209639 | -0.08547590079223 | 0.97002994476524  |
| C | -4.88926130916609 | 2.72776665571711  | -1.66659350798102 |
| C | -0.09962726905396 | 1.25306367667723  | -2.26518180589356 |
| C | 0.78974446235667  | 2.13501420560376  | -2.87127493986011 |
| H | 0.89054136309862  | 4.55196144967225  | -0.48461710254229 |
| C | 0.62121703279222  | 3.62475381648365  | -0.98118320673760 |
| H | 1.83743006631588  | 4.00715335938430  | -2.71492479796345 |
| H | -0.38690156007017 | 0.35166920967495  | -2.79593601678763 |
| H | 1.19507706367620  | 1.89552544068914  | -3.84960288174864 |
| C | -4.58884872176542 | 0.70616935644372  | 0.23405054315269  |
| C | -5.99868393403165 | 2.23972474098188  | -0.98297182534536 |

|   |                   |                   |                   |
|---|-------------------|-------------------|-------------------|
| H | 5.79861355857418  | 1.64840508579785  | 2.21990070332141  |
| C | -5.84639613928886 | 1.23218275772144  | -0.03245656464893 |
| H | -5.00413275901821 | 3.51358336990951  | -2.40697868990326 |
| C | -0.46360826858013 | 1.18847888291086  | 4.12886829967038  |
| C | -1.75812342051977 | 1.56351314924591  | 3.77027782462442  |
| C | -2.24427904475297 | 1.27271762749398  | 2.50160336670693  |
| H | -2.38532002443738 | 2.10217119189727  | 4.47338626638409  |
| C | -0.14559740280184 | 0.16651539956688  | 1.97524569242338  |
| H | -2.76355810733912 | 2.60247637481616  | -1.94009697270209 |
| H | -0.08597258936244 | 1.42598505379743  | 5.11914655092126  |
| C | 0.34371478185120  | 0.49100131043731  | 3.23788200227819  |
| H | 1.34291705725929  | 0.17212290835645  | 3.51999010578497  |
| H | 5.97771652015355  | -1.65877579418709 | -2.15113960796687 |
| H | 6.60855628303633  | -2.08643841010557 | -0.54261429541400 |
| H | 6.38601387374791  | -3.33893264282110 | -1.77233836051100 |
| H | 3.69584025158323  | 3.11302433888077  | 2.09932563729936  |
| H | 4.60927070366429  | 4.26013422883239  | 1.10589674733445  |
| H | 3.06783913884695  | 3.62389255261589  | 0.51545733027364  |
| C | 5.96026319769191  | -2.41772417098771 | -1.36117020737830 |
| H | 3.61976006138855  | -4.10260241698414 | 0.55034451250893  |
| H | 5.11186231561202  | -4.68765167537100 | -0.20822816163660 |
| C | 4.61101049267427  | -3.80325976345755 | 0.20213814974147  |
| H | 5.18960533846911  | -3.45112563749289 | 1.06346160458122  |
| H | 4.20535655680893  | -4.09429060054095 | -2.51493143052737 |
| C | 3.71765931621914  | -3.21182237161911 | -2.08520736294057 |
| H | 2.69975137164243  | -3.48924442602572 | -1.80043405057786 |
| H | 3.66284582995083  | -2.43925053931328 | -2.86052311387508 |
| C | 3.97622122216645  | 3.36729286401175  | 1.07075055916420  |
| H | 5.71528351478454  | 1.91036897863701  | -1.54611657017280 |
| H | 4.20909047018929  | 2.84502887917535  | -1.62525284671951 |
| C | 5.11462893443715  | 2.66849295748771  | -1.03336708785627 |
| H | 5.69450489687539  | 3.59843223085951  | -1.00271631126058 |
| H | 6.66946884185443  | 1.21849267761012  | 0.73551947386038  |
| C | 6.03690160517458  | 1.97941648609186  | 1.20280326100226  |
| H | 6.61848471254478  | 2.90620133166948  | 1.26926826221003  |
| H | -6.70956024814422 | 0.84921208734719  | 0.50353298296956  |
| H | -6.98498012165027 | 2.64544016045945  | -1.18936475247567 |
| C | -0.54268006772365 | -1.98042535740629 | -1.00158290682309 |
| C | -1.86442602253132 | -1.18825300361067 | -1.00389989559963 |
| H | -4.45835023860530 | -3.56087067239438 | 2.11394150571578  |
| C | -5.28443858279071 | -2.83140685826542 | -1.09668394405304 |
| H | -2.42789599595561 | -2.35172512226109 | 1.46857848595000  |
| C | -3.08682287640830 | -1.96431138155993 | -0.55841962333935 |
| C | -4.37094867013542 | -3.16747917309515 | 1.10535034133239  |



|   |                   |                   |                   |
|---|-------------------|-------------------|-------------------|
| H | -6.30858653375373 | -3.87437340385326 | 0.48566128112935  |
| C | -4.13278966811515 | -2.14506474288724 | -1.46787249075315 |
| C | -5.40821007167561 | -3.34194268773505 | 0.19288526087646  |
| H | -6.08788056399255 | -2.96236897469676 | -1.81586190897159 |
| C | -3.21688387499414 | -2.48353123422281 | 0.73332103087490  |
| H | -4.04876778618540 | -1.73600616878365 | -2.47196814894272 |
| H | 0.22078006217677  | -1.46372096884031 | -1.59614955607939 |
| H | -0.74056978013277 | -2.95466980872746 | -1.46652349356476 |
| H | -2.04968620220438 | -0.87913692099125 | -2.04356129697708 |

### Phosphenium ion 2a + Styrene P-b

E[a.u.] (r<sup>2</sup>-SCAN-3c-CPCM(CH<sub>2</sub>Cl<sub>2</sub>): -2361.716875

Gibbs free energy correction (kcal mol<sup>-1</sup>): 473.44

E[a.u.] (PW6B95-D4/def2-QZVPP-SMD(CH<sub>2</sub>Cl<sub>2</sub>): -2365.836569

|   |                   |                   |                   |
|---|-------------------|-------------------|-------------------|
| C | 3.19979456984208  | -2.04337009380344 | 0.07691528421951  |
| C | 1.90495618485769  | -1.87208807032582 | -0.41751637294385 |
| H | -3.99595552108273 | -1.82588908387645 | -1.87271995415528 |
| C | 1.51211864665292  | -0.60186835321558 | -0.81788453547884 |
| H | 1.20797701373991  | -2.69752014977303 | -0.49964158927788 |
| C | 3.67745624771255  | 0.36497633852805  | -0.24071636222391 |
| C | 4.63249420498895  | 1.55740433554079  | -0.16971769731426 |
| C | 3.71040646537755  | -3.40798817938174 | 0.54851376236549  |
| C | 4.04446045861257  | -0.92766739081209 | 0.15997290868882  |
| H | 5.04224976328740  | -1.07165865036505 | 0.55531129513569  |
| N | 0.24959417525346  | -0.22577005282791 | -1.31630811831079 |
| C | 2.37839510978314  | 0.48614932285410  | -0.72921650910756 |
| O | 1.83046125319361  | 1.66709342091376  | -1.22976949423369 |
| C | -2.00264800111660 | -1.06145306798091 | -1.53175964364509 |
| C | -1.26034549298402 | -2.43444198747910 | 1.19783451144653  |
| P | 0.19342853533524  | 1.51452072879592  | -1.55774928075809 |
| P | -2.40760477635213 | -0.20749653738885 | 0.01044842397571  |
| C | -0.33511724017944 | -2.45787563667279 | 3.42479174651498  |
| C | -1.55653862945209 | -1.07528387877756 | 1.34438010332709  |
| H | -1.50102588703848 | -2.95615564347451 | 0.27570668102710  |
| C | -4.72098995563791 | -1.11136007817904 | 1.27381965912500  |
| C | -4.19526912749263 | -0.31524354213595 | 0.25316579454821  |
| H | -4.64496576578813 | 1.02321119496052  | -1.39473643739317 |
| C | -6.09988210425004 | -1.17624408429559 | 1.45084292739748  |
| C | -1.25202621380729 | -0.40981501320165 | 2.53784068026782  |
| C | -0.63419114771345 | -1.10496877864551 | 3.57090351127698  |
| H | -0.43226585476223 | -4.17860004100620 | 2.13261480482959  |
| C | -0.65553866886691 | -3.12207345062839 | 2.24399254673850  |
| H | 0.14605198947835  | -2.99648289270447 | 4.23607500856760  |

|   |                   |                   |                   |
|---|-------------------|-------------------|-------------------|
| H | -1.49229796766303 | 0.64054627862054  | 2.67304815872117  |
| H | -0.38860311552123 | -0.58666319438239 | 4.49274225638680  |
| C | -5.04594081960054 | 0.41219221130087  | -0.59002982088645 |
| C | -6.94707092589804 | -0.45322445501753 | 0.61638315103197  |
| H | 5.35773837276938  | -4.75566043184368 | 0.10967389446619  |
| C | -6.42052276265468 | 0.33863630537985  | -0.40310963794679 |
| H | -6.50979552201645 | -1.79336099356593 | 2.24457574704620  |
| C | -1.21602936157625 | -2.77663125267296 | -3.57431651793519 |
| C | -2.56014993034812 | -2.70191350456479 | -3.20804400834497 |
| C | -2.95629619449089 | -1.85243090047905 | -2.18327333844816 |
| H | -3.29886937935700 | -3.31794076587011 | -3.71068951172684 |
| C | -0.65649364190821 | -1.10381802666204 | -1.93740693091336 |
| H | -4.06288069554022 | -1.67577811689983 | 1.92773611116600  |
| H | -0.90913311184746 | -3.44712783490064 | -4.37177462985725 |
| C | -0.26525176359786 | -1.98000557505027 | -2.94817617820725 |
| H | 0.77687375017534  | -2.01047580476840 | -3.25236402889677 |
| H | 5.89423181027234  | 0.78943099675423  | 1.44904350081072  |
| H | 6.50025007765498  | 0.40978048011564  | -0.18085619598920 |
| H | 6.63076215507792  | 2.05559605966523  | 0.45507271811868  |
| H | 1.75934539629888  | -4.34649787891967 | 0.86678709112320  |
| H | 2.43917841689977  | -4.62488963564919 | -0.75333725582168 |
| H | 3.10309849523184  | -5.47630394818275 | 0.65079425646977  |
| C | 5.99136845720330  | 1.16724524758397  | 0.42523098509887  |
| H | 3.95019377126479  | 2.45626352246523  | -2.05389156898760 |
| H | 5.57744215535984  | 2.94447465198958  | -1.54686730365926 |
| C | 4.87524225945574  | 2.10401686641412  | -1.59118074420893 |
| H | 5.30992831300671  | 1.32776311304168  | -2.23079633311133 |
| H | 3.08176124712928  | 3.03534085579057  | 0.31093387265174  |
| C | 4.02394307837943  | 2.66084353838334  | 0.71739787776303  |
| H | 3.83730296305881  | 2.28199305783577  | 1.72880082789600  |
| H | 4.72296166156193  | 3.50202712117688  | 0.79007620276166  |
| C | 2.68581581789163  | -4.52311767842567 | 0.30970525196390  |
| H | 4.77410152845230  | -2.58888252750495 | 2.28233032559132  |
| H | 3.10219647744227  | -3.08076711321209 | 2.61821005414235  |
| C | 4.00897868636944  | -3.33921994985310 | 2.05864184315301  |
| H | 4.36992307261492  | -4.31100167502914 | 2.41542269004019  |
| H | 4.81321719537010  | -3.80877603858390 | -1.29207428739838 |
| C | 4.99972792270459  | -3.77118242125437 | -0.21292610551740 |
| H | 5.79881924659619  | -3.04653078884966 | -0.02946420187013 |
| H | -7.08143710778751 | 0.90046892881825  | -1.05609630284134 |
| H | -8.02257777590230 | -0.50626462119054 | 0.75881540483488  |
| C | -0.53133878850746 | 1.98143916681238  | 0.11739248019946  |
| C | -2.01592263521352 | 1.58548974178529  | 0.10440762057265  |
| C | -0.33411847551863 | 3.45366906751174  | 0.36319796739512  |

|   |                   |                  |                   |
|---|-------------------|------------------|-------------------|
| H | -1.59033253226322 | 4.11170791536047 | -1.27072034278750 |
| C | 0.73573457997388  | 5.23242191195239 | 1.61365818832126  |
| C | -0.71045028289076 | 5.77171215088608 | -0.23549709775804 |
| H | 0.98702920400882  | 3.13645079347932 | 2.03193667821744  |
| C | 0.50817929838008  | 3.87679506914446 | 1.39547359347468  |
| C | 0.12616143719872  | 6.18418609823387 | 0.79940948555668  |
| H | -1.18637677758387 | 6.50772591791302 | -0.87742352379689 |
| C | -0.93888541008064 | 4.41630519870401 | -0.45491998627134 |
| H | 1.38992614329380  | 5.54500871534715 | 2.4228896966725   |
| H | 0.30248649240278  | 7.24244689185211 | 0.96956543660836  |
| H | -2.50700908808138 | 1.92764496732569 | 1.02584376406828  |
| H | -2.55396084291014 | 2.05634854909266 | -0.72877266600048 |
| H | 0.01095659166824  | 1.40651190195475 | 0.87913255225399  |

### Phosphenium ion 2a + Styrene P-c

E[a.u.] (r<sup>2</sup>-SCAN-3c-CPCM(CH<sub>2</sub>Cl<sub>2</sub>): -2361.71687498628

Gibbs free energy correction (kcal mol<sup>-1</sup>): 473.46

E[a.u.] (PW6B95-D4/def2-QZVPP-SMD(CH<sub>2</sub>Cl<sub>2</sub>): -2365.82642605234

|   |                   |                   |                   |
|---|-------------------|-------------------|-------------------|
| C | -4.10369298951983 | 0.98766920890144  | 0.51352019964386  |
| C | -2.76359770954067 | 0.86185220965804  | 0.90163973247184  |
| H | 3.29816130882773  | 0.81368387543534  | 2.54150836042496  |
| C | -2.08778359325548 | -0.30992646139897 | 0.60312963284501  |
| H | -2.25343106376932 | 1.66462225408748  | 1.42401675584742  |
| C | -4.04272077565960 | -1.25884691464109 | -0.51519620748730 |
| C | -4.71740853061508 | -2.38817830377014 | -1.29508759630255 |
| C | -4.84579168472094 | 2.28394656746793  | 0.85035013591792  |
| C | -4.70768130054060 | -0.06615094671585 | -0.17577795270814 |
| H | -5.73944858925664 | 0.03853870457515  | -0.47991123157153 |
| N | -0.73523893448133 | -0.61827490566112 | 0.86559409432586  |
| C | -2.71878619393080 | -1.33872020680196 | -0.10354326180489 |
| O | -1.89074244723311 | -2.44075211856126 | -0.32114365645045 |
| C | 1.44141299018563  | 0.16084069214479  | 1.64695720644132  |
| C | 3.48377150186311  | -2.67977817228427 | -0.78921931611061 |
| P | -0.28723290648878 | -2.06593036834308 | -0.01933588516733 |
| P | 2.32674154574267  | -0.30613696984800 | 0.13471371029304  |
| C | 4.15024160868570  | -4.49468365170630 | 0.65393753326402  |
| C | 3.03748940837672  | -1.96365489818144 | 0.32869463687670  |
| H | 3.41441878996088  | -2.26561293281921 | -1.79044867818474 |
| C | 3.41320673651840  | 2.25243571503677  | 0.07625197611298  |
| C | 3.67628257697389  | 0.88407127562751  | -0.06960231116767 |
| H | 5.16924598360100  | -0.61451726971490 | -0.52475201151185 |
| C | 4.43089691234099  | 3.17219170804740  | -0.13733742070759 |
| C | 3.15163004827627  | -2.51754165466187 | 1.60861360920635  |

|   |                   |                   |                   |
|---|-------------------|-------------------|-------------------|
| C | 3.71119806849584  | -3.77948967995061 | 1.76558944358711  |
| H | 4.37951398015632  | -4.49784146780630 | -1.48874163720997 |
| C | 4.03664875899791  | -3.94403716095920 | -0.62009059137945 |
| H | 4.58036198142913  | -5.48403158314710 | 0.78014948814219  |
| H | 2.79256254639427  | -1.97657025382379 | 2.47880315886516  |
| H | 3.79630535290521  | -4.20727709104025 | 2.75985273733538  |
| C | 4.95410592992195  | 0.44473019277083  | -0.42444489437823 |
| C | 5.70462936819602  | 2.73636504820316  | -0.49946631431806 |
| H | -5.35876194839203 | 1.64353466385660  | 2.87340955515028  |
| C | 5.96513520963630  | 1.37670385099157  | -0.64070452683418 |
| H | 4.22682647351574  | 4.23245931312250  | -0.02269004378194 |
| C | 0.27923555016254  | 0.92834513750207  | 4.06444589094292  |
| C | 1.65480010077241  | 1.07808539706483  | 3.88299237573434  |
| C | 2.22889264715512  | 0.69002681549759  | 2.68456570476655  |
| H | 2.27479692404108  | 1.49785755255678  | 4.66821959524243  |
| C | 0.05586181334252  | -0.02502741922595 | 1.84954615042291  |
| H | 2.42259511392802  | 2.59911458344583  | 0.35643066514111  |
| H | -0.18086466114541 | 1.22209492218043  | 5.00352638175297  |
| C | -0.50868657514562 | 0.37900518709646  | 3.06759165853713  |
| H | -1.56998625060733 | 0.22593808213832  | 3.23235635027789  |
| H | -5.24007426208446 | -3.52515879699966 | 0.49133716997837  |
| H | -5.21178095316164 | -4.48115504652477 | -1.00443093146216 |
| H | -3.69023968943973 | -4.01010507402984 | -0.22634330957427 |
| H | -6.77518204817169 | 3.22038284405420  | 0.62854570834484  |
| H | -6.35618352624498 | 2.16741161122898  | -0.73071923671687 |
| H | -6.87534370076701 | 1.46364380039202  | 0.81855706615343  |
| C | -4.70655434867590 | -3.67987134429366 | -0.45312732422363 |
| H | -6.25899869694285 | -1.16566598078142 | -2.26180962584380 |
| H | -6.60850033674613 | -2.89869896570527 | -2.18660873472851 |
| C | -6.17715479279794 | -2.05860346053468 | -1.63249289904338 |
| H | -6.78002729115568 | -1.90822085455936 | -0.73019470560113 |
| H | -2.92579240131988 | -2.91187189954551 | -2.45396012031871 |
| C | -3.96457330068856 | -2.61694868624724 | -2.62148375962823 |
| H | -4.45858972382424 | -3.41179224895780 | -3.19197779821822 |
| H | -3.97261601615666 | -1.70431079833478 | -3.22795410156307 |
| C | -6.29755896813560 | 2.27278051206923  | 0.35824532811691  |
| H | -4.08631505996635 | 3.34453372075776  | -0.90077930157115 |
| H | -4.64672386659835 | 4.40519421846057  | 0.41108386207595  |
| C | -4.11922082351705 | 3.47074219081493  | 0.18739267715074  |
| H | -3.09119785657167 | 3.56918538559470  | 0.55096087396364  |
| H | -3.83885355833323 | 2.55489701216671  | 2.78211798232659  |
| C | -4.85414615177885 | 2.48106053794668  | 2.37881322623783  |
| H | -5.38669432263280 | 3.40433658198350  | 2.63465348276373  |
| H | 6.95888089901477  | 1.03468418614962  | -0.91335650427332 |

---

|   |                   |                   |                   |
|---|-------------------|-------------------|-------------------|
| H | 6.49743486299990  | 3.46005791315314  | -0.66591865747942 |
| C | 0.16750211380701  | -1.23356980788993 | -1.62583195117047 |
| C | 1.37016533014351  | -0.26225587312605 | -1.48396678031160 |
| H | -1.01413771383931 | 3.76629411052883  | -1.19686566874055 |
| C | 1.68212161443777  | 3.12972851095780  | -3.16033481478063 |
| H | -0.63133845388720 | 1.42082901808833  | -0.57572627100945 |
| C | 1.08140447015227  | 1.17418994047551  | -1.86493978375108 |
| C | -0.19148608962762 | 3.22023266141702  | -1.65006010260819 |
| H | 0.46322840981461  | 4.87965389273620  | -2.85807077432083 |
| C | 1.90531822852955  | 1.80407840590829  | -2.80147970207287 |
| C | 0.63633279334067  | 3.84368061450910  | -2.58112705326695 |
| H | 2.32936720718672  | 3.60500140097353  | -3.89188507709397 |
| C | 0.02819268614382  | 1.89312192609088  | -1.29499413043024 |
| H | 2.73184044104947  | 1.25534059446774  | -3.24721999430436 |
| H | 0.40876514953697  | -2.00908309452540 | -2.36128728866072 |
| H | -0.70566063461520 | -0.67865557642501 | -1.98812392556642 |
| H | 2.16468730542273  | -0.60921660879111 | -2.15693025127099 |

#### Phosphenium ion 2a + Benzaldehyde TS-1a

E[a.u.] (r<sup>2</sup>-SCAN-3c-CPCM(CH<sub>2</sub>Cl<sub>2</sub>): -2397.607007

Gibbs free energy correction (kcal mol<sup>-1</sup>): 456.97

E[a.u.] (PW6B95-D4/def2-QZVPP-SMD(CH<sub>2</sub>Cl<sub>2</sub>): -2401.75898

|   |                   |                   |                   |
|---|-------------------|-------------------|-------------------|
| C | -3.78605058717411 | -1.05231878371876 | 0.23354105887308  |
| C | -2.61718919033347 | -1.04026671339845 | 0.98625307764170  |
| H | 2.61381787537384  | -2.50964633452047 | 2.56481573079560  |
| C | -2.00654560876840 | 0.19096647080861  | 1.19352446892508  |
| H | -2.18608682299224 | -1.93692448350515 | 1.41444320506592  |
| C | -3.67127883121341 | 1.40520976890670  | -0.12496711944614 |
| C | -4.20096904548738 | 2.69869237514384  | -0.73725756019225 |
| C | -4.57924131451980 | -2.33865188911164 | -0.00448136837867 |
| C | -4.27368354447735 | 0.15949510248520  | -0.30265387370496 |
| H | -5.18101014563886 | 0.12000499208438  | -0.89245951110478 |
| N | -0.85268591574879 | 0.46801307743051  | 1.93699865599938  |
| C | -2.51809098079537 | 1.36919493352895  | 0.65849992615737  |
| O | -1.74006292469947 | 2.46173759054071  | 0.99477013032909  |
| C | 1.05944923884407  | -1.07305669739147 | 2.18084556209153  |
| C | 0.41617206777250  | -2.44428669260591 | -0.69511239735819 |
| P | -0.42029657988914 | 2.09244274397250  | 1.88839373621062  |
| P | 1.74591525577301  | -0.32552116051533 | 0.64661184479069  |
| C | -1.01609401547421 | -2.10258960337662 | -2.60715342594362 |
| C | 0.66326144990639  | -1.06780867091538 | -0.63439419182449 |
| H | 0.87949031236325  | -3.11304840252844 | 0.02677808408524  |
| C | 3.74058606443666  | -1.74123789710914 | -0.76674326054688 |

|   |                   |                   |                   |
|---|-------------------|-------------------|-------------------|
| C | 3.38535853752469  | -1.09148902464257 | 0.41983597950561  |
| H | 4.12182731971328  | -0.30181471911298 | 2.29610955677337  |
| C | 5.05725052207123  | -2.14559597582968 | -0.97675011484068 |
| C | 0.04780473857158  | -0.21310232151208 | -1.55342619547380 |
| C | -0.79202441435780 | -0.73093681739225 | -2.53715167007139 |
| H | -0.59869988435813 | -4.02813856732032 | -1.73278956301384 |
| C | -0.41583169011920 | -2.95832519127333 | -1.68304168765818 |
| H | -1.66238426670767 | -2.50812909069096 | -3.38052494446237 |
| H | 0.21614730673458  | 0.85914366757341  | -1.49497436058231 |
| H | -1.26886324102645 | -0.06138484445556 | -3.24744674275401 |
| C | 4.37436194598642  | -0.83608318465342 | 1.38214077096787  |
| C | 6.02881763620416  | -1.90949741992730 | -0.00854351711830 |
| H | -2.88433952380097 | -3.71315032012330 | 0.14527642228759  |
| C | 5.68253365079817  | -1.25585407947614 | 1.17377725572807  |
| H | 5.32109001531142  | -2.64902410406671 | -1.90269536468599 |
| C | -0.09353448096826 | -2.03482267747053 | 4.56013374949267  |
| C | 1.10771309997219  | -2.56240218483954 | 4.09466257619134  |
| C | 1.67902098768234  | -2.08557461027844 | 2.91880943464683  |
| H | 1.60428976912715  | -3.35450093663409 | 4.64741927905677  |
| C | -0.14883604354464 | -0.55581878726091 | 2.67165870875025  |
| H | 2.99345938686057  | -1.92855069892851 | -1.53241547566879 |
| H | -0.53732375672849 | -2.40348553937769 | 5.47971728218231  |
| C | -0.72827875341475 | -1.02561563991740 | 3.84424040554563  |
| H | -1.66692015497170 | -0.59886054577724 | 4.18613306347345  |
| H | -5.30461074936596 | 1.76847023983326  | -2.38503756828268 |
| H | -6.28751819906357 | 2.06112974950534  | -0.92916838065105 |
| H | -5.81304340390412 | 3.41185207597221  | -1.96939876877769 |
| H | -5.33142270622596 | -3.49185492173769 | -1.68018566428831 |
| H | -5.30983514979592 | -1.75039299091852 | -1.99342499415413 |
| H | -3.79207902927452 | -2.66985253790291 | -2.01136657777868 |
| C | -5.47753213954381 | 2.45758877252163  | -1.55118154741072 |
| H | -3.64197784298080 | 3.98073851869878  | 0.96085488719795  |
| H | -4.93804627738643 | 4.62128240313792  | -0.06057867651057 |
| C | -4.52776801252926 | 3.70710888821137  | 0.38236096246482  |
| H | -5.27545812028377 | 3.29189506333604  | 1.06688382428668  |
| H | -3.51633505457513 | 4.19931751363503  | -2.14569662646267 |
| C | -3.13099120951934 | 3.28486177606994  | -1.68129262920307 |
| H | -2.20899638926533 | 3.53670975998556  | -1.15079530485251 |
| H | -2.88942473822334 | 2.57087064028627  | -2.47655744983827 |
| C | -4.76331407424605 | -2.56940751254801 | -1.51610782016665 |
| H | -6.53962298563845 | -3.11504723943054 | 0.51816369863361  |
| H | -5.85443189062303 | -2.02093772098978 | 1.74013640746432  |
| C | -5.96121876303141 | -2.19566441058365 | 0.66377626563040  |
| H | -6.53169973465221 | -1.36493217243923 | 0.23606125207791  |

|   |                   |                   |                   |
|---|-------------------|-------------------|-------------------|
| H | -3.76691005435128 | -3.48625321066286 | 1.67467063889673  |
| C | -3.87644717452102 | -3.56550021353802 | 0.58736728126738  |
| H | -4.47420137217118 | -4.45822865458891 | 0.37734021779084  |
| H | 6.43658797562810  | -1.06150054049548 | 1.93132942481646  |
| H | 7.05403273468059  | -2.22793775968903 | -0.17482333190894 |
| O | 0.80029435963515  | 2.85200566246137  | 0.01155071942249  |
| C | 2.00745729678682  | 2.58823587967058  | 0.17386750868103  |
| H | 3.19311563847042  | 2.43159683187737  | -4.30626977466111 |
| C | 5.22966691839514  | 1.99834550910639  | -1.61092218795329 |
| H | 1.52136917358408  | 2.75683524733157  | -2.49546712032807 |
| C | 2.95932258874796  | 2.44783082965962  | -0.91708783335630 |
| C | 3.49454260745720  | 2.36092476971251  | -3.26544357832708 |
| H | 5.55271461214338  | 1.93699021442778  | -3.73713481353066 |
| C | 4.29952800971458  | 2.18252256731911  | -0.59797732758340 |
| C | 4.82619354780961  | 2.08421252305082  | -2.94288753324216 |
| H | 6.26602283370704  | 1.78516819175061  | -1.36677832115681 |
| C | 2.55960347148222  | 2.54307753898605  | -2.25916971493257 |
| H | 4.59813716290797  | 2.10904770677853  | 0.44488573006338  |
| H | 2.42876167620425  | 2.52508489938188  | 1.19046010592596  |

#### Phosphenium ion 2a + Benzaldehyde TS-Ib

E[a.u.] ( $r^2$ -SCAN-3c-CPCM( $\text{CH}_2\text{Cl}_2$ ): -2397.603354

Gibbs free energy correction ( $\text{kcal mol}^{-1}$ ): 456.84

E[a.u.] (PW6B95-D4/def2-QZVPP-SMD( $\text{CH}_2\text{Cl}_2$ ): -2401.754642

|   |                   |                   |                   |
|---|-------------------|-------------------|-------------------|
| C | -3.79628317093806 | -0.91794302403027 | 0.30468410737236  |
| C | -2.52438163952577 | -0.90339357941278 | 0.86297199266372  |
| H | 2.77606081523369  | -2.49851254208684 | 1.79923499473282  |
| C | -1.87751028211648 | 0.32635869103840  | 0.93378917662942  |
| H | -2.03785957438318 | -1.79427221114060 | 1.24151626582442  |
| C | -3.72558437662398 | 1.53121534239998  | -0.13082943430107 |
| C | -4.34595798046436 | 2.81702153409076  | -0.66939728214397 |
| C | -4.63054637896900 | -2.19667837643217 | 0.22053255761311  |
| C | -4.35251674572312 | 0.28795111141716  | -0.18151487346694 |
| H | -5.34125529087900 | 0.24265948988794  | -0.62081412771176 |
| N | -0.62224404280376 | 0.60823531798715  | 1.48037909454283  |
| C | -2.46137939441259 | 1.50042701724273  | 0.46029875436139  |
| O | -1.64393590855135 | 2.59224775119920  | 0.66548104485948  |
| C | 1.22827182829568  | -1.03010634579402 | 1.52831841118905  |
| C | 0.22728033098621  | -3.00267965354057 | -0.79405812337460 |
| P | -0.21277163910912 | 2.22617735870741  | 1.36111951548485  |
| P | 1.60879150802756  | -0.57743687290977 | -0.22267511521184 |
| C | -1.38979876713347 | -3.20739109893875 | -2.57356618020274 |
| C | 0.42456055781355  | -1.65661192062463 | -1.12366022234550 |

|   |                   |                   |                   |
|---|-------------------|-------------------|-------------------|
| H | 0.78186555675402  | -3.44985528385435 | 0.02748000050229  |
| C | 3.47656440826702  | -2.32145506333247 | -1.47242528822247 |
| C | 3.24351222581001  | -1.35717309024525 | -0.48722213112156 |
| H | 4.16739703272212  | -0.07991782041310 | 0.99434199558371  |
| C | 4.76938263644285  | -2.78699148738384 | -1.70576313239726 |
| C | -0.30480020807649 | -1.09109603409949 | -2.17369933742031 |
| C | -1.21050704923734 | -1.86549775615451 | -2.89623075498563 |
| H | -0.81504047622501 | -4.82103210691454 | -1.26525235351327 |
| C | -0.67143610920932 | -3.77481992710452 | -1.52099387782231 |
| H | -2.09335485453334 | -3.81321366404903 | -3.13798028797376 |
| H | -0.16895805945983 | -0.04162983059979 | -2.42426320914225 |
| H | -1.77561524539460 | -1.41856995190057 | -3.70930076073145 |
| C | 4.32853640652154  | -0.85219076876719 | 0.24434192207123  |
| C | 5.83817783235105  | -2.29923781287608 | -0.95896186425728 |
| H | -2.95436488537235 | -3.60093528224138 | 0.19264941483922  |
| C | 5.61333773854141  | -1.33084363664218 | 0.01887417624673  |
| H | 4.93786834317552  | -3.53787914741037 | -2.47279250442991 |
| C | 0.52795999094802  | -1.63191753267186 | 4.19129058349198  |
| C | 1.59587430754638  | -2.28142359504302 | 3.57801064848835  |
| C | 1.94152601760225  | -1.98269548669720 | 2.26437990151166  |
| H | 2.16364325100002  | -3.02930400586217 | 4.12377273128046  |
| C | 0.16570041797659  | -0.38493930531723 | 2.17397992316921  |
| H | 2.65108115262593  | -2.71401866125994 | -2.05911048313987 |
| H | 0.25911726911286  | -1.86033495011042 | 5.21796677504095  |
| C | -0.19381345072932 | -0.67694415370790 | 3.48544695041952  |
| H | -1.02848072337720 | -0.15167168524585 | 3.94095007468199  |
| H | -5.68250310242118 | 1.86292446895373  | -2.11894816792332 |
| H | -6.43597013702585 | 2.17447026064456  | -0.53547773717267 |
| H | -6.12775371491412 | 3.51109553459463  | -1.65303451486487 |
| H | -5.59383463117512 | -3.39646503069208 | -1.30852931680877 |
| H | -5.62045566747474 | -1.66399802290590 | -1.66915581724648 |
| H | -4.11476064745498 | -2.58310349589087 | -1.86426631645618 |
| C | -5.73004381010667 | 2.56302011850136  | -1.27764716427300 |
| H | -3.54082733900560 | 4.11419973785523  | 0.91462409630842  |
| H | -4.97813319223008 | 4.74329669997147  | 0.09497470305917  |
| C | -4.50312916086438 | 3.83390899612100  | 0.47900125948374  |
| H | -5.13790342943719 | 3.42361287483141  | 1.27189761531419  |
| H | -3.89506648268600 | 4.30447049028447  | -2.17985807141413 |
| C | -3.43478023920223 | 3.39908897991501  | -1.76930013007579 |
| H | -2.44666822266039 | 3.66570739975437  | -1.38588217124796 |
| H | -3.30783646627776 | 2.67810250290145  | -2.58429522489421 |
| C | -5.01221322855739 | -2.46991112976772 | -1.24705793399695 |
| H | -6.51499742336367 | -2.92195111805703 | 1.01797402854870  |
| H | -5.66302950068501 | -1.80299213538617 | 2.10472934639142  |



|   |                   |                   |                   |
|---|-------------------|-------------------|-------------------|
| C | -5.91157762927299 | -2.00812949218551 | 1.05758257135686  |
| H | -6.52383801602019 | -1.18239959386165 | 0.68152196636843  |
| H | -3.61333972725385 | -3.29478754634267 | 1.81797217085681  |
| C | -3.87282160827394 | -3.41448795818005 | 0.76011209748882  |
| H | -4.50857354818451 | -4.30116812396487 | 0.67114983553245  |
| H | 6.44318333884643  | -0.93701396525280 | 0.59921979534730  |
| H | 6.84398574139628  | -2.66750387136149 | -1.14052327822827 |
| O | 0.60664735134646  | 2.74291647067990  | -0.93257753599762 |
| C | 1.68724505896610  | 2.33551439664303  | -1.37802486341696 |
| H | 4.53977756230434  | 4.25974052570605  | 1.73937076344915  |
| C | 5.39646082185413  | 2.33275768027147  | -0.93306679331578 |
| H | 2.27375000145833  | 3.83861129014669  | 0.81800814013181  |
| C | 2.99884664103345  | 2.60962918046457  | -0.80096566106032 |
| C | 4.41682915004861  | 3.64451019364674  | 0.85289727363369  |
| H | 6.53063055312888  | 3.30521509981946  | 0.61484915272731  |
| C | 4.12906094080060  | 2.08108044769923  | -1.44029726247482 |
| C | 5.53953445472480  | 3.10870029197618  | 0.21540239181452  |
| H | 6.27164912348575  | 1.91978618200262  | -1.42548274653501 |
| C | 3.14931259458311  | 3.40340797205247  | 0.34626225676719  |
| H | 4.00336549595349  | 1.46633880251152  | -2.32881319316752 |
| H | 1.69821072011097  | 1.77371093674416  | -2.33028423269432 |

### Phosphenium ion 2a + Benzaldehyde TS-II (Inversion)

E[a.u.] ( $r^2$ -SCAN-3c-CPCM( $\text{CH}_2\text{Cl}_2$ ): -2397.599414

Gibbs free energy correction ( $\text{kcal mol}^{-1}$ ): 457.32

E[a.u.] (PW6B95-D4/def2-QZVPP-SMD( $\text{CH}_2\text{Cl}_2$ )): -2401.758851

|   |                   |                   |                   |
|---|-------------------|-------------------|-------------------|
| C | 4.18297165655602  | 0.82494452255850  | 0.95631459306662  |
| C | 2.79505092213679  | 0.85316503490127  | 0.90677444197766  |
| H | -2.98620675018963 | 2.17313505781671  | 1.18481235577358  |
| C | 2.13422866521285  | -0.21434726056766 | 0.29794590433941  |
| H | 2.22842614310928  | 1.67267428042577  | 1.32962833608547  |
| C | 4.24114814140212  | -1.34514225656615 | -0.23543323293356 |
| C | 5.00341707712937  | -2.51168481337811 | -0.86050367666812 |
| C | 4.99327663508461  | 1.95570452045422  | 1.59382256854432  |
| C | 4.86752593232847  | -0.27688890014688 | 0.40087568540789  |
| H | 5.94937933258825  | -0.27957216568465 | 0.45381187400917  |
| N | 0.75313690913291  | -0.42547653928083 | 0.17482023429273  |
| C | 2.84310415095623  | -1.25341230055843 | -0.30775494162386 |
| O | 2.02672330842775  | -2.08890554144485 | -0.99512528457287 |
| C | -1.34449793542848 | 0.90614408955892  | 0.60796468429035  |
| C | 0.09428799234121  | 1.73936913444030  | -2.12644662984135 |
| P | 0.32397796464785  | -1.70132800080689 | -0.91510831338160 |
| P | -2.11560672965680 | 0.50476125893942  | -0.97188037201184 |

|   |                   |                   |                   |
|---|-------------------|-------------------|-------------------|
| C | 0.74070867914098  | 1.43824904541044  | -4.43002972229357 |
| C | -0.98236703347950 | 0.86904721799864  | -2.32810684276207 |
| H | 0.26397143239380  | 2.19171350248963  | -1.15310278974653 |
| C | -4.76399158092535 | 1.20711652560602  | -0.40844156423817 |
| C | -3.65200270159263 | 1.41348258841550  | -1.23960162656880 |
| H | -2.87338823886685 | 2.49331340525720  | -2.94785597041580 |
| C | -5.93886643259095 | 1.90730977509121  | -0.64870729311016 |
| C | -1.20801772905702 | 0.29665571835416  | -3.58621929927595 |
| C | -0.34331733469743 | 0.58631745277294  | -4.63383946044718 |
| H | 1.79658791845674  | 2.68570234953750  | -3.02475542879776 |
| C | 0.95591531081410  | 2.01658669184880  | -3.18091661114873 |
| H | 1.41944019865783  | 1.65454138239625  | -5.24997225814777 |
| H | -2.05066186425621 | -0.36981400551828 | -3.75177413933969 |
| H | -0.51394643616062 | 0.14169893156870  | -5.60945292622273 |
| C | -3.72945550653441 | 2.32182970555167  | -2.30339093883653 |
| C | -6.01697777637464 | 2.80540355485167  | -1.71102425661757 |
| H | 5.32837910418412  | 2.98679978509957  | -0.30123034963331 |
| C | -4.91345739460444 | 3.01305258353877  | -2.53370270883276 |
| H | -6.79655839019317 | 1.74608917170626  | -0.00273262040239 |
| C | -0.52655842712883 | 1.16316059609830  | 3.26639136623028  |
| C | -1.66411155071093 | 1.83194165517710  | 2.83082402499795  |
| C | -2.07711216325411 | 1.68163587406904  | 1.51467405842839  |
| H | -2.24241310880327 | 2.44780593718329  | 3.51171077945200  |
| C | -0.14561440098447 | 0.28834244661359  | 1.03678415185030  |
| H | -4.71825825152060 | 0.51199620181466  | 0.42360823403869  |
| H | -0.21294572165919 | 1.22819741602350  | 4.30400039186343  |
| C | 0.22254568753889  | 0.40425477914933  | 2.37763450681906  |
| H | 1.11101693567187  | -0.11214587637567 | 2.72506523906556  |
| H | 6.94457768491817  | -1.51261353811968 | -1.06022516031336 |
| H | 6.74087137496936  | -2.40076137286486 | 0.46903646632466  |
| H | 7.00531968883551  | -3.28014013327340 | -1.04495121197425 |
| H | 6.55603354428135  | 0.63120307319542  | 2.38733875112933  |
| H | 6.42378416402494  | 2.19271052868809  | 3.21170630290495  |
| H | 5.21186623611400  | 0.92693397514198  | 3.50739501713331  |
| C | 6.51178656939312  | -2.40881465675744 | -0.60239932185164 |
| H | 4.66393402633014  | -3.84320987274820 | 0.83395861546667  |
| H | 3.44132540895234  | -3.99934891862114 | -0.44469239737977 |
| C | 4.50415175931780  | -3.83648348536830 | -0.24999336044367 |
| H | 5.06278161288716  | -4.67347979823460 | -0.68374078260315 |
| H | 5.35169828061482  | -3.33677539471655 | -2.83668255046635 |
| C | 4.77880030004686  | -2.51815536198882 | -2.38631611549487 |
| H | 3.72551226154910  | -2.65740908921605 | -2.64115716354220 |
| H | 5.12203310641886  | -1.57602948231724 | -2.82809682767125 |
| C | 5.84824883010199  | 1.38644622797583  | 2.74283664638965  |

|   |                   |                   |                   |
|---|-------------------|-------------------|-------------------|
| H | 3.43284339907910  | 2.68044949254710  | 2.94785457907970  |
| H | 4.72579318850032  | 3.84009835858402  | 2.60803745118029  |
| C | 4.09734282079639  | 3.06140587572534  | 2.16378558397854  |
| H | 3.48571386510717  | 3.53020221968353  | 1.38473616288726  |
| H | 6.49733651461391  | 3.39674230335377  | 0.97327461990433  |
| C | 5.91646226174594  | 2.58023364794799  | 0.52919318308238  |
| H | 6.62061316959371  | 1.84718748885766  | 0.12324551131097  |
| H | -4.96969400543977 | 3.71642860109183  | -3.35884018830303 |
| H | -6.94038219075301 | 3.34683663120113  | -1.89576296203219 |
| O | -1.25722497844198 | -1.82248579094974 | -0.01577318063867 |
| C | -2.31803882749779 | -1.42934245682195 | -0.82740300716922 |
| H | -6.83424760429295 | -2.44069265763423 | -1.25622460218455 |
| C | -5.08298373703161 | -2.18631035797407 | 1.64607020433225  |
| H | -4.59688857639127 | -1.92409233749121 | -2.18782606618029 |
| C | -3.65018374193492 | -1.80374033718528 | -0.25609804944774 |
| C | -5.99243066972987 | -2.28582599074696 | -0.58757436702126 |
| H | -7.15004985231912 | -2.59591022856277 | 1.20119397990570  |
| C | -3.82396158341300 | -1.90076828357777 | 1.12672769471644  |
| C | -6.16850413931689 | -2.37435175566494 | 0.79191613085567  |
| H | -5.21756360720218 | -2.26140121884559 | 2.72134380881897  |
| C | -4.73599204743552 | -2.00083199922129 | -1.11165874933401 |
| H | -2.97626782919487 | -1.74893824512437 | 1.78818372936691  |
| H | -2.22345531703989 | -1.78265319235777 | -1.86927354737862 |

### Phosphenium ion 2a + Benzaldehyde TS-III

E[a.u.] (r<sup>2</sup>-SCAN-3c-CPCM(CH<sub>2</sub>Cl<sub>2</sub>): -2397.633744

Gibbs free energy correction (kcal mol<sup>-1</sup>): 457.4

E[a.u.] (PW6B95-D4/def2-QZVPP-SMD(CH<sub>2</sub>Cl<sub>2</sub>): -2401.799176

|   |                   |                   |                   |
|---|-------------------|-------------------|-------------------|
| C | -3.80440690152163 | -1.03102563314929 | 0.39560492777016  |
| C | -2.54766983708636 | -0.89882734239285 | 0.99342558149292  |
| H | 2.99519491211251  | -2.05050013071992 | 1.98144685230435  |
| C | -1.90714869701125 | 0.32708652034359  | 0.90353835064117  |
| H | -2.07282157902559 | -1.71668532390782 | 1.52258348407202  |
| C | -3.70586664505087 | 1.30582866941460  | -0.41682747991600 |
| C | -4.31228135798147 | 2.48411810719039  | -1.17873780134051 |
| C | -4.62366332044465 | -2.31996146729667 | 0.52100821027546  |
| C | -4.34350292032081 | 0.06216057648611  | -0.29717755497990 |
| H | -5.31867872585810 | -0.05305782212659 | -0.75391688077835 |
| N | -0.64006654474983 | 0.67534872473461  | 1.41219218939245  |
| C | -2.47648941014061 | 1.39863140162337  | 0.22706495185834  |
| O | -1.69462475632371 | 2.54931501380848  | 0.30616817974975  |
| C | 1.31954215409907  | -0.71850383222501 | 1.66291813587506  |
| C | 0.02407432622024  | -2.35705414570041 | -0.96093624824781 |

|   |                   |                   |                   |
|---|-------------------|-------------------|-------------------|
| P | -0.32361747928802 | 2.38000222069515  | 1.25547654344906  |
| P | 1.62471322681451  | -0.31100928613220 | -0.07726521276375 |
| C | -1.68223677149447 | -2.15319075985744 | -2.64984810934132 |
| C | 0.28272435086103  | -0.98510407938917 | -1.07444424262224 |
| H | 0.59357085145053  | -2.97058345466516 | -0.26646572748403 |
| C | 3.18850346473961  | -1.71755125806799 | -1.88157793155561 |
| C | 3.16323298784674  | -1.08491552323672 | -0.63333294419832 |
| H | 4.34970925892657  | -0.45442981394043 | 1.07158891983162  |
| C | 4.38014035697863  | -2.25156277338168 | -2.36120006062732 |
| C | -0.45980248089191 | -0.19381352964821 | -1.95345116476863 |
| C | -1.44303517618591 | -0.78579255905768 | -2.73914282850764 |
| H | -1.15069053315332 | -4.00219950770450 | -1.67640265739978 |
| C | -0.95518070074096 | -2.93708506220281 | -1.75568886114270 |
| H | -2.44287169514670 | -2.61009943977436 | -3.27607357658048 |
| H | -0.29325161580239 | 0.87645286398064  | -2.03151125844985 |
| H | -2.02268230600718 | -0.17228471418012 | -3.42163786073775 |
| C | 4.34038641213578  | -0.97981782110842 | 0.12217722613555  |
| C | 5.54281589154000  | -2.16191682358838 | -1.60223693866416 |
| H | -2.92337747326446 | -3.68489366175436 | 0.70571249084756  |
| C | 5.52051259526276  | -1.52680483662045 | -0.36190597828855 |
| H | 4.39491706674409  | -2.73899865365630 | -3.33121388396136 |
| C | 0.52751162462754  | -1.44270468370596 | 4.23103234215418  |
| C | 1.69978622352054  | -1.96327498134238 | 3.68847772167037  |
| C | 2.09939306108716  | -1.60986801344631 | 2.40400818514932  |
| H | 2.30503667357621  | -2.65763212812557 | 4.26259805116070  |
| C | 0.13615361778561  | -0.19979906035088 | 2.21279514605270  |
| H | 2.28747444894787  | -1.79242260082007 | -2.48181613889116 |
| H | 0.22337434204825  | -1.72232743199530 | 5.23529980044830  |
| C | -0.26039058822485 | -0.56373171828655 | 3.49401576345045  |
| H | -1.17892672524744 | -0.15308881461914 | 3.90315023149375  |
| H | -5.54762609897550 | 1.29244461036853  | -2.54002713145467 |
| H | -6.40450010299334 | 1.83936187350823  | -1.07908626653935 |
| H | -6.03163883063411 | 2.98740475626884  | -2.37252294098900 |
| H | -5.62640340570811 | -3.74811581529179 | -0.77081876708813 |
| H | -5.61290490724105 | -2.10486000385482 | -1.42971503968881 |
| H | -4.13270656885016 | -3.08177547462122 | -1.46224340459093 |
| C | -5.65317181127050 | 2.11710235080851  | -1.82633879502867 |
| H | -3.62695747838442 | 4.01234138534459  | 0.24206644171914  |
| H | -5.01445391156060 | 4.49334556142006  | -0.75170870840833 |
| C | -4.55656911187603 | 3.65803983100556  | -0.20949675051057 |
| H | -5.23861732206235 | 3.35539370021134  | 0.59285361769804  |
| H | -3.78153422762070 | 3.76040461936163  | -2.85362361519382 |
| C | -3.34745790167685 | 2.92024570415527  | -2.29953270161651 |
| H | -2.37941236945241 | 3.23678319250482  | -1.90320104277770 |

|   |                   |                   |                   |
|---|-------------------|-------------------|-------------------|
| H | -3.18178241874929 | 2.09638251637473  | -3.00281217757598 |
| C | -5.02273747907409 | -2.83887736324921 | -0.87262455736085 |
| H | -6.49244457000010 | -2.93082662569392 | 1.45487979823247  |
| H | -5.64145416685226 | -1.63711849708520 | 2.32827209379516  |
| C | -5.89873279840250 | -2.01716553252873 | 1.33316784353692  |
| H | -6.52265001929009 | -1.26956720745028 | 0.83284053035075  |
| H | -3.59268665965832 | -3.15211829957000 | 2.26593891912630  |
| C | -3.84782309070126 | -3.43166818152303 | 1.23770206109965  |
| H | -4.46779562275898 | -4.33319128247218 | 1.28247152050051  |
| H | 6.42780584553564  | -1.44567213399641 | 0.22895688111223  |
| H | 6.47061395230056  | -2.58287013671139 | -1.97894882263861 |
| O | 0.96249546011844  | 2.44628074778158  | 0.21223404321949  |
| C | 1.84720105810749  | 1.54075432146600  | -0.44079703448747 |
| H | 5.24353037960973  | 2.75244598883621  | 2.51741324754650  |
| C | 5.52309138076783  | 2.36757237506742  | -0.84723429433964 |
| H | 2.89679126504454  | 2.16335399130595  | 1.99476916457536  |
| C | 3.26220655853460  | 1.94514131804185  | -0.11930923484319 |
| C | 4.95427362669403  | 2.54670528071980  | 1.49090103013024  |
| H | 6.92882795448540  | 2.88328494948114  | 0.69938154468450  |
| C | 4.20575184784534  | 2.03051803977704  | -1.14254775364438 |
| C | 5.90030368314702  | 2.62021989706367  | 0.46933997679033  |
| H | 6.25446142977850  | 2.43457487074654  | -1.64739385305317 |
| C | 3.63643148469880  | 2.21257209107241  | 1.19917871765965  |
| H | 3.91173517902945  | 1.82470256867172  | -2.16912884237491 |
| H | 1.68760716173297  | 1.59361160258489  | -1.52737664160053 |

### Phosphenium ion 2a + Benzaldehyde P-a

E[a.u.] ( $r^2$ -SCAN-3c-CPCM(CH<sub>2</sub>Cl<sub>2</sub>): -2397.633359

Gibbs free energy correction (kcal mol<sup>-1</sup>): 458.27

E[a.u.] (PW6B95-D4/def2-QZVPP-SMD(CH<sub>2</sub>Cl<sub>2</sub>): -2401.800479

|   |                   |                   |                   |
|---|-------------------|-------------------|-------------------|
| C | -3.85356797207003 | -0.93095658796567 | 0.37531567548423  |
| C | -2.55570601555611 | -0.88425269484016 | 0.88973225608373  |
| H | 3.15071894135106  | -2.04137389948939 | 1.90861824238868  |
| C | -1.86284575319861 | 0.31541190605404  | 0.81093345386079  |
| H | -2.08568989585003 | -1.74685822570853 | 1.34714749987793  |
| C | -3.70123655273950 | 1.43579172882462  | -0.33681407323454 |
| C | -4.29377302583929 | 2.66862694362886  | -1.01899215586315 |
| C | -4.72011425961372 | -2.18947901626147 | 0.48295965427147  |
| C | -4.38484035224013 | 0.21650748503333  | -0.23218082695981 |
| H | -5.38731923195709 | 0.16194934804281  | -0.63802776887079 |
| N | -0.55600536737840 | 0.58633714978324  | 1.26000432286465  |
| C | -2.42892356189902 | 1.44235638401104  | 0.22572016130811  |
| O | -1.59816633032643 | 2.56476579970846  | 0.30859264125636  |

|   |                   |                   |                   |
|---|-------------------|-------------------|-------------------|
| C | 1.42404366951137  | -0.79645498591746 | 1.52847138530789  |
| C | 0.09873408477081  | -2.62886129644798 | -0.81644746879982 |
| P | -0.08876811762772 | 2.21760150724720  | 0.88638903619736  |
| P | 1.74396033218489  | -0.50822379826628 | -0.23273134879532 |
| C | -1.57948619134917 | -2.64890190561855 | -2.54573803864987 |
| C | 0.40490767189487  | -1.30206830873849 | -1.14480076837333 |
| H | 0.63454852663410  | -3.13937080245284 | -0.01964276469270 |
| C | 3.36665565121317  | -2.06677267035248 | -1.84958175638925 |
| C | 3.32024023182284  | -1.24663091637654 | -0.71638269681513 |
| H | 4.47965067876606  | -0.29179422054838 | 0.85128259430353  |
| C | 4.58576675556453  | -2.58383144622112 | -2.27511260324751 |
| C | -0.29262601502731 | -0.64338428534753 | -2.16137948398922 |
| C | -1.28886483908783 | -1.32319047898141 | -2.85457523745451 |
| H | -1.11787669764910 | -4.33271262172307 | -1.28131200865884 |
| C | -0.88819497676137 | -3.30021428470841 | -1.52626000564139 |
| H | -2.34921818102067 | -3.17726404905210 | -3.10062463064931 |
| H | -0.07958613151911 | 0.38977283899668  | -2.41219260244498 |
| H | -1.83569450189982 | -0.81188688482248 | -3.64099773267418 |
| C | 4.49814553125150  | -0.94078169481025 | -0.01899462856395 |
| C | 5.75325500493773  | -2.28798578416073 | -1.57775445523531 |
| H | -3.07716814396656 | -3.63313253921683 | 0.53981114127962  |
| C | 5.70776458551380  | -1.46808521504831 | -0.45183647682598 |
| H | 4.61898910762692  | -3.22026647244092 | -3.15407527563525 |
| C | 0.60371236410746  | -1.51418414574029 | 4.08883835846788  |
| C | 1.81467636933066  | -1.98635830800058 | 3.58719011129073  |
| C | 2.22619088310596  | -1.63673711816645 | 2.30635858316818  |
| H | 2.43743075075100  | -2.64061049316601 | 4.18890254318433  |
| C | 0.21536711758262  | -0.29926767437106 | 2.04909795488469  |
| H | 2.46049270285276  | -2.30237376713014 | -2.39898023231324 |
| H | 0.28533132511646  | -1.79217907158407 | 5.08916090794554  |
| C | -0.19669220164266 | -0.67182000050095 | 3.32441474774577  |
| H | -1.13267290861391 | -0.28223181245324 | 3.71402959706353  |
| H | -5.68341313270621 | 1.59256602216057  | -2.32729383458600 |
| H | -6.40386584064915 | 2.12434226633250  | -0.78891429691187 |
| H | -6.06464815827438 | 3.30132654917299  | -2.06594620283471 |
| H | -5.80873171830891 | -3.52886431435953 | -0.83605998002082 |
| H | -5.78819743142284 | -1.85276517778227 | -1.40669275192953 |
| H | -4.33222650984141 | -2.85417338027084 | -1.55766812812567 |
| C | -5.69455030181993 | 2.39300966417547  | -1.57934564061372 |
| H | -3.42979802132003 | 4.11904110293792  | 0.38749200747333  |
| H | -4.85556702497332 | 4.69702318835893  | -0.49241816852725 |
| C | -4.40582677460093 | 3.82450164200681  | -0.00492137757454 |
| H | -5.04510615674230 | 3.53490935764667  | 0.83648710151094  |
| H | -3.81441385537033 | 3.95411303215740  | -2.70238950225927 |

---

|   |                   |                   |                   |
|---|-------------------|-------------------|-------------------|
| C | -3.38429120485065 | 3.08417029909049  | -2.19312715991692 |
| H | -2.37936332135932 | 3.34916730870348  | -1.85500271207344 |
| H | -3.30141954054941 | 2.26774584943652  | -2.91962639690876 |
| C | -5.19056483359639 | -2.62729789829784 | -0.91644337825679 |
| H | -6.57642702942027 | -2.76609931061467 | 1.46035436765592  |
| H | -5.64017927990711 | -1.54980487376774 | 2.35704360071339  |
| C | -5.95003010241607 | -1.87237146050697 | 1.35665913398157  |
| H | -6.56099283944948 | -1.07831707336534 | 0.91560533780949  |
| H | -3.65036417639222 | -3.12885199940936 | 2.14685627075482  |
| C | -3.96408382742522 | -3.35974974568284 | 1.12267684650047  |
| H | -4.62169318109922 | -4.23426841658441 | 1.16475796077783  |
| H | 6.61753628203002  | -1.23316324577198 | 0.09220231975299  |
| H | 6.70274594897461  | -2.69592926225178 | -1.91231560693882 |
| O | 0.63984324116773  | 2.00509489682486  | -0.63656772023991 |
| C | 1.86633143941814  | 1.30122304502228  | -0.77386417576111 |
| H | 4.55815959460378  | 2.90648954994742  | 2.72537330841352  |
| C | 5.28590415166943  | 2.91068541697294  | -0.59180769510173 |
| H | 2.50026193751237  | 1.87764564868843  | 1.89071591307422  |
| C | 3.09483610350546  | 1.96086868971583  | -0.19462494616830 |
| C | 4.43636842942513  | 2.74949736425831  | 1.65779346912822  |
| H | 6.36371546826945  | 3.56598449436843  | 1.15305069778338  |
| C | 4.11418470720738  | 2.33608526339548  | -1.07372803468733 |
| C | 5.44934095611630  | 3.11781072505417  | 0.77502783183586  |
| H | 6.07111096253326  | 3.19554782100773  | -1.28592786593205 |
| C | 3.26651562570522  | 2.16965551333990  | 1.17853153907272  |
| H | 3.99282723061501  | 2.16956063223028  | -2.14112915487805 |
| H | 2.01707356068487  | 1.18855094595971  | -1.85699343244971 |

#### Phosphenium ion 2a + Benzaldehyde P-b

E[a.u.] (r<sup>2</sup>-SCAN-3c-CPCM(CH<sub>2</sub>Cl<sub>2</sub>): -2397.639236

Gibbs free energy correction (kcal mol<sup>-1</sup>): 458.25

E[a.u.] (PW6B95-D4/def2-QZVPP-SMD(CH<sub>2</sub>Cl<sub>2</sub>): -2401.805814

|   |                   |                   |                   |
|---|-------------------|-------------------|-------------------|
| C | -4.07594231192289 | 0.99830935045951  | 0.62433344426571  |
| C | -2.75665676957014 | 0.82837859994217  | 1.06216213477160  |
| H | 3.30719403703343  | 0.88638324212281  | 2.50637454465159  |
| C | -2.08199531977829 | -0.32666989479959 | 0.70271255652991  |
| H | -2.26195410995901 | 1.58480454385228  | 1.66178666292625  |
| C | -3.99127753257925 | -1.16202910852968 | -0.57515889736058 |
| C | -4.63688968216908 | -2.21752636342263 | -1.47332826009378 |
| C | -4.81984063807245 | 2.27751379226192  | 1.01841878711224  |
| C | -4.66007975547032 | 0.00593138808624  | -0.16787501410286 |
| H | -5.67788072421085 | 0.14487994939345  | -0.50349799685763 |
| N | -0.74843634887890 | -0.68983622015698 | 0.99227904152346  |
| C | -2.68701466382592 | -1.28077167739266 | -0.11703279744378 |

|   |                   |                   |                   |
|---|-------------------|-------------------|-------------------|
| O | -1.83765356489658 | -2.35367004268944 | -0.40983454121830 |
| C | 1.44367204001188  | 0.15729545243572  | 1.68765977955590  |
| C | 3.62082664194314  | -2.66648032726311 | -0.65616166468048 |
| P | -0.27680121202787 | -2.05003747523609 | 0.02232818090226  |
| P | 2.31771403328624  | -0.34288492677170 | 0.17750962301678  |
| C | 4.25261500667362  | -4.45681984822755 | 0.83234428000216  |
| C | 3.07683994288541  | -1.96752475464025 | 0.42978286201824  |
| H | 3.60347685675827  | -2.25304686048007 | -1.66015806027233 |
| C | 3.27210512160317  | 2.24697528046436  | -0.06926320150195 |
| C | 3.60795470809766  | 0.88722464457139  | -0.12222229299386 |
| H | 5.18447902718174  | -0.55955094660510 | -0.45014677987541 |
| C | 4.24473615992324  | 3.20149861658706  | -0.33089162748681 |
| C | 3.12062711271588  | -2.51856549381171 | 1.71522661748510  |
| C | 3.71213990553057  | -3.76081729224789 | 1.91046261527080  |
| H | 4.62775493713814  | -4.44921095056741 | -1.29009475418018 |
| C | 4.20661244275970  | -3.90919363668217 | -0.44765198792032 |
| H | 4.70906647473298  | -5.42992608620862 | 0.98861803669245  |
| H | 2.68690731072098  | -1.99105577487055 | 2.55913230340873  |
| H | 3.74375302023443  | -4.18718678975740 | 2.90840513793391  |
| C | 4.91235891920913  | 0.49074475395780  | -0.42791858814735 |
| C | 5.54444222292663  | 2.80855609801584  | -0.64809420711714 |
| H | -5.39412377377750 | 1.52307660226271  | 2.98477327773120  |
| C | 5.87697597831158  | 1.45816781010857  | -0.69369086992291 |
| H | 3.98579156945938  | 4.25506902040176  | -0.28885221983548 |
| C | 0.34648055233040  | 0.89553976422624  | 4.14436402590137  |
| C | 1.70448625050566  | 1.10336002755116  | 3.90557966358567  |
| C | 2.24883575553741  | 0.72625039600410  | 2.68936655570521  |
| H | 2.33683257668543  | 1.55634222499478  | 4.66199911118471  |
| C | 0.07500033789829  | -0.07185991487621 | 1.94217273729602  |
| H | 2.26079132205802  | 2.55955990663920  | 0.17557486959318  |
| H | -0.08797806221484 | 1.17617478983622  | 5.09933882884357  |
| C | -0.45620810934551 | 0.30788321560009  | 3.18062189333773  |
| H | -1.50335912012039 | 0.11179926449460  | 3.38594338403376  |
| H | -5.21618480882872 | -3.50382770164081 | 0.19048994644888  |
| H | -5.14053793248604 | -4.32563973054534 | -1.38143677472342 |
| H | -3.64479637820563 | -3.93054127289317 | -0.51772661538997 |
| H | -6.73756418912360 | 3.23850163323927  | 0.80251305621110  |
| H | -6.28465461149150 | 2.27338925426800  | -0.60950677626942 |
| H | -6.85107493506816 | 1.47360066600893  | 0.87541849507123  |
| C | -4.65295104099566 | -3.57727443269799 | -0.74643126401730 |
| H | -6.14554828903379 | -0.91434550990078 | -2.38526595658124 |
| H | -6.49779445290457 | -2.64635810050981 | -2.46464579635978 |
| C | -6.08458499595315 | -1.85623098913273 | -1.82928219740452 |
| H | -6.71641759709313 | -1.77916841719479 | -0.93761594444527 |



---

|   |                   |                   |                   |
|---|-------------------|-------------------|-------------------|
| H | -2.80683001101339 | -2.64634013871129 | -2.61245110166161 |
| C | -3.83824259711433 | -2.33126282240193 | -2.78768175938532 |
| H | -4.31484329567010 | -3.06941663828302 | -3.44279975077747 |
| H | -3.82237226435073 | -1.36843577321083 | -3.31032559161466 |
| C | -6.25679623329510 | 2.30726299491105  | 0.48518868243497  |
| H | -4.00865212955073 | 3.43289565126205  | -0.64673272225495 |
| H | -4.59039662519875 | 4.41903146129770  | 0.71287227959679  |
| C | -4.06600081871380 | 3.49425430741318  | 0.44599176535943  |
| H | -3.04600637770857 | 3.55919590309568  | 0.83868381130846  |
| H | -3.86926211844163 | 2.43072411407100  | 2.99205766719619  |
| C | -4.87193473534832 | 2.38507248581966  | 2.55474416898388  |
| H | -5.40865316671044 | 3.29475382388339  | 2.84743371869669  |
| H | 6.89127346866572  | 1.15120981437081  | -0.92964198760586 |
| H | 6.30159006773139  | 3.55984815780465  | -0.85351587645732 |
| O | 0.15175053632902  | -1.25329595027081 | -1.41008378595790 |
| C | 1.30200244756333  | -0.41953419830616 | -1.43889057915783 |
| H | -1.19452783213636 | 3.53432659710500  | -1.51760275975998 |
| C | 1.57690877465899  | 2.83105922003901  | -3.35322659734245 |
| H | -0.77273493270749 | 1.24579473852004  | -0.71672012514344 |
| C | 0.98466560156082  | 0.96466572580145  | -1.93729754043187 |
| C | -0.34456559113070 | 2.97883773041584  | -1.90385092871470 |
| H | 0.30755522739648  | 4.56399030172336  | -3.20847799438230 |
| C | 1.81962089712954  | 1.53917214700236  | -2.89814638268507 |
| C | 0.49771453697349  | 3.55530249548476  | -2.85306883668986 |
| H | 2.23056522011528  | 3.27026045854105  | -4.10120524825964 |
| C | -0.10366427107847 | 1.68807772525983  | -1.44611890893873 |
| H | 2.66560901598443  | 0.97630603473782  | -3.28572329600396 |
| H | 2.04382605591179  | -0.87203273640963 | -2.11407248916014 |

**Phosphenium ion 2a + Benzaldehyde P-c**

E[a.u.] ( $r^2$ -SCAN-3c-CPCM(CH<sub>2</sub>Cl<sub>2</sub>): -2397.643892

Gibbs free energy correction (kcal mol<sup>-1</sup>): 458.42

E[a.u.] (PW6B95-D4/def2-QZVPP-SMD(CH<sub>2</sub>Cl<sub>2</sub>): -2401.810121

|   |                   |                   |                   |
|---|-------------------|-------------------|-------------------|
| C | 3.76436298951770  | 0.36330114573464  | 0.16392929050757  |
| C | 2.67196897317484  | 0.61165254306223  | 1.00070272818002  |
| H | -2.25358803149476 | 3.15282756003673  | 1.88547830526532  |
| C | 1.83979143344747  | -0.45245199553122 | 1.32196648005095  |
| H | 2.45470226935547  | 1.60031005194797  | 1.38852198474610  |
| C | 3.13179821852214  | -2.02302986761866 | -0.02515366079973 |
| C | 3.33458070556969  | -3.41852278292209 | -0.61318636019958 |
| C | 4.73611411682145  | 1.47530743087068  | -0.24224340675148 |
| C | 3.96920528295265  | -0.93700879011060 | -0.31976331167115 |
| H | 4.81895799629625  | -1.11410021585243 | -0.96725640769472 |

|   |                   |                   |                   |
|---|-------------------|-------------------|-------------------|
| N | 0.66713580711615  | -0.42305082440646 | 2.09543875038371  |
| C | 2.06880655301188  | -1.72976935072556 | 0.82243384232050  |
| O | 1.10318482510181  | -2.64075423310852 | 1.25513801256447  |
| C | -0.92418904870954 | 1.44340780058330  | 1.88866967056696  |
| C | -1.94678583524494 | 3.19472314907052  | -1.32027836461558 |
| P | -0.17771725242239 | -1.93741624491074 | 2.06326745146345  |
| P | -1.58426420212844 | 0.93086671225490  | 0.27403690341445  |
| C | -0.19964342574907 | 4.15178022988477  | -2.68092474657140 |
| C | -1.07535950739425 | 2.16871735349331  | -0.93812102635611 |
| H | -2.96074879806378 | 3.23515956389278  | -0.93552730237901 |
| C | -3.96555035423740 | 0.57859293946678  | 1.64278336503816  |
| C | -3.37449809895646 | 0.82942261494213  | 0.39880316902262  |
| H | -3.70356501750425 | 1.03414480485370  | -1.73549541563504 |
| C | -5.34059996263160 | 0.39193341237590  | 1.72241158244844  |
| C | 0.24463395149901  | 2.15058329588422  | -1.40948502097169 |
| C | 0.67328753245910  | 3.14102283698092  | -2.28398265280451 |
| H | -2.18173610885521 | 4.97488989926090  | -2.49210271425570 |
| C | -1.50354637045702 | 4.18102777749648  | -2.19450105111738 |
| H | 0.14069212696529  | 4.92321328452311  | -3.36557283152177 |
| H | 0.94652384834446  | 1.38305926601393  | -1.09224739239732 |
| H | 1.69413846629342  | 3.12389261853070  | -2.65278649673641 |
| C | -4.15805324710242 | 0.87077856659049  | -0.76294938559160 |
| C | -6.12265164135086 | 0.45415115269185  | 0.57163842977483  |
| H | 3.79740396492171  | 1.77733099929608  | -2.18948763079910 |
| C | -5.53208782884637 | 0.69195613338043  | -0.66737637735785 |
| H | -5.79999094650972 | 0.19922547816856  | 2.68698336953841  |
| C | 0.07414582623877  | 2.51513512850329  | 4.26579624614118  |
| C | -0.95480972433638 | 3.16566427879136  | 3.58826983413748  |
| C | -1.45141011024458 | 2.63578803932001  | 2.40618375428230  |
| H | -1.37294820037590 | 4.08785486102973  | 3.97918843832265  |
| C | 0.10660143634016  | 0.78564607149937  | 2.58026670489783  |
| H | -3.36074589777135 | 0.52876274209497  | 2.54313341025114  |
| H | 0.46391114313000  | 2.92782030793280  | 5.19146975914897  |
| C | 0.59808421754079  | 1.33029134620905  | 3.76567747370288  |
| H | 1.39252288674532  | 0.80457960136985  | 4.28707357954065  |
| H | 4.51024530245814  | -2.80658460672183 | -2.35893960086229 |
| H | 5.49357315400733  | -3.25630677131392 | -0.94503078494463 |
| H | 4.67748705791236  | -4.50627429407316 | -1.89627525082311 |
| H | 6.51095481093897  | 0.19612312363474  | -0.10094309162541 |
| H | 6.84656746288547  | 1.93347122746364  | 0.01883708158087  |
| H | 6.12308929746782  | 1.07007184894187  | 1.39371437165679  |
| C | 4.58061599019987  | -3.48847275144753 | -1.50445667168383 |
| H | 4.36793714644331  | -4.19148252265962 | 1.14503530314965  |
| H | 2.61905655723211  | -4.49706735683922 | 1.16214249340455  |

---

|   |                   |                   |                   |
|---|-------------------|-------------------|-------------------|
| C | 3.50316771900258  | -4.44698481163004 | 0.52258161789632  |
| H | 3.67177893120928  | -5.44156770093360 | 0.09429431737890  |
| H | 2.24843516134539  | -4.77402546644744 | -1.91843498157856 |
| C | 2.10807852392548  | -3.78108801102240 | -1.47618560969281 |
| H | 1.18698502083255  | -3.79671371626268 | -0.88754601300982 |
| H | 1.98655457554187  | -3.05716202599628 | -2.29022356476583 |
| C | 6.13970209441953  | 1.14435360460820  | 0.30062621008224  |
| H | 4.29612541204715  | 2.85361731115963  | 1.40277035481443  |
| H | 5.03207948233737  | 3.60099033418806  | -0.02177918228525 |
| C | 4.31374134125877  | 2.84297514568381  | 0.30731302735741  |
| H | 3.32336318327520  | 3.13737081751503  | -0.06013743846606 |
| H | 5.46204346393800  | 2.38962812330256  | -2.07588477728352 |
| C | 4.79306800766655  | 1.57375240574606  | -1.77892024112931 |
| H | 5.16626718495268  | 0.65081767105034  | -2.23298218723990 |
| H | -6.14006887084883 | 0.73113152135945  | -1.56598731000240 |
| H | -7.19757743755939 | 0.31351767462069  | 0.64003899352458  |
| O | -1.30305657920444 | -1.65005769564514 | 0.85078910763580  |
| C | -0.99223674527638 | -0.79075768743158 | -0.24840813438608 |
| H | -1.36140953765119 | -1.03891733313033 | -4.87338754832615 |
| C | -3.54609893806409 | -2.31744495186680 | -2.60648416084856 |
| H | -0.19455398672962 | -0.38874607097368 | -2.79360472818472 |
| C | -1.70053061375189 | -1.23027416122777 | -1.49794586452211 |
| C | -1.79933594547362 | -1.28480239389285 | -3.91048802693181 |
| H | -3.50892920781436 | -2.28171234446694 | -4.75889563097749 |
| C | -2.90352847890743 | -1.93704441917072 | -1.43305780666214 |
| C | -3.00202960243262 | -1.98535203324775 | -3.84499582441595 |
| H | -4.47838120524147 | -2.87210743451256 | -2.55163551752900 |
| C | -1.14508489154018 | -0.91370363294433 | -2.74069867181753 |
| H | -3.33236175494611 | -2.19162132136040 | -0.46923721750323 |
| H | 0.08604880116489  | -0.73053118190768 | -0.44289647946789 |

**Phosphenium ion 2a + Benzaldehyde (isomer)**

E[a.u.] (r<sup>2</sup>-SCAN-3c-CPCM(CH<sub>2</sub>Cl<sub>2</sub>): -2397.634665

Gibbs free energy correction (kcal mol<sup>-1</sup>): 458.21

E[a.u.] (PW6B95-D4/def2-QZVPP-SMD(CH<sub>2</sub>Cl<sub>2</sub>): -2401.800838

|   |                   |                   |                   |
|---|-------------------|-------------------|-------------------|
| C | 3.63425708460365  | -1.40970903313197 | 0.07722020913705  |
| C | 2.34378032157040  | -1.52542108571750 | -0.44339311553100 |
| H | -3.52308946785983 | -2.59400829549364 | -1.81431474448600 |
| C | 1.69141282522799  | -0.37082823412046 | -0.85439749185063 |
| H | 1.84728434315946  | -2.48367681809228 | -0.53618968923535 |
| C | 3.58073754640419  | 1.04576013999751  | -0.23722607283692 |
| C | 4.24524514707126  | 2.41953400046871  | -0.14130040876856 |
| C | 4.41715621573304  | -2.63067861270098 | 0.56856187214732  |

|   |                   |                   |                   |
|---|-------------------|-------------------|-------------------|
| C | 4.21304151735245  | -0.13646581796228 | 0.17368227052283  |
| H | 5.20862644080776  | -0.05874156554532 | 0.59234146409027  |
| N | 0.38515728410931  | -0.27303870807376 | -1.37227336227407 |
| C | 2.29760222887887  | 0.87940328318350  | -0.75139775249876 |
| O | 1.51040474708103  | 1.91547321735532  | -1.26189146449055 |
| C | -1.67976430652409 | -1.50139287819735 | -1.51779535446798 |
| C | -0.59705325710354 | -2.52194895040084 | 1.28212249573664  |
| P | -0.04521956738569 | 1.41169349488222  | -1.60961570367987 |
| P | -2.22732174506566 | -0.67513016119586 | -0.01890256983895 |
| C | 0.06170203307257  | -2.28540168820714 | 3.59002112370223  |
| C | -1.29775574196600 | -1.31554028163207 | 1.37378608981021  |
| H | -0.58146869202201 | -3.08401997729837 | 0.35292748666638  |
| C | -4.46314837322182 | -1.83864475445205 | 1.13029338359345  |
| C | -3.98840417469301 | -0.92682460933466 | 0.18359257606301  |
| H | -4.49972545103873 | 0.48932236789745  | -1.37477850166970 |
| C | -5.83449230472683 | -2.03517558713720 | 1.25691925126582  |
| C | -1.33157671372049 | -0.59796631487381 | 2.57823150450074  |
| C | -0.64388698457865 | -1.08586119696923 | 3.68097878983645  |
| H | 0.62291237050591  | -3.94098058674662 | 2.33256583432200  |
| C | 0.07961904123925  | -3.00346945448951 | 2.39770031352341  |
| H | 0.59748275880473  | -2.66308354147280 | 4.45611467254900  |
| H | -1.88831511207948 | 0.33317369171114  | 2.65142277167795  |
| H | -0.65948968483271 | -0.52970205556866 | 4.61321208383396  |
| C | -4.87369829604101 | -0.21552057437016 | -0.63722909879240 |
| C | -6.71882768371679 | -1.32709455995083 | 0.44782441855305  |
| H | 2.71295333044833  | -3.98254425890697 | 0.82434675107197  |
| C | -6.24003088158575 | -0.41923141859874 | -0.49645355963521 |
| H | -6.21018243353147 | -2.74045105049454 | 1.99179432580825  |
| C | -0.61632329936697 | -3.15233855587231 | -3.48152153347633 |
| C | -1.95592451938642 | -3.28656565283298 | -3.11189664753051 |
| C | -2.49157894346584 | -2.46725974361400 | -2.12815887177986 |
| H | -2.57927927563565 | -4.03942390745796 | -3.58341893047539 |
| C | -0.34609505032022 | -1.33206015538585 | -1.93530140156242 |
| H | -3.77229667523570 | -2.38907271587538 | 1.76243958699717  |
| H | -0.20135631476127 | -3.79897217867593 | -4.24920022600619 |
| C | 0.18886217604819  | -2.17743319019071 | -2.90498827970478 |
| H | 1.21900513571834  | -2.04507207745025 | -3.22190662012450 |
| H | 3.88168688263955  | 4.32531595462846  | 0.83145100620694  |
| H | 2.39562843004369  | 3.51517303348135  | 0.30708728988422  |
| H | 3.26449698197351  | 2.92996762673906  | 1.74019732409844  |
| H | 5.19647979080109  | -3.37192319876576 | 2.46041954712044  |
| H | 5.21194861914822  | -1.60231698398013 | 2.33418806607710  |
| H | 3.68087098261379  | -2.45489341769605 | 2.61525901513376  |
| C | 3.38697006237963  | 3.35196068022947  | 0.73614949174745  |

|   |                   |                   |                   |
|---|-------------------|-------------------|-------------------|
| H | 6.32005799144210  | 1.71337611661579  | -0.11229678273916 |
| H | 6.06954616471705  | 3.34289471802243  | 0.52941010120898  |
| C | 5.64341806154782  | 2.33539007631707  | 0.48372416015976  |
| H | 5.61027179520982  | 1.93893640670904  | 1.50455290575662  |
| H | 4.89019317021931  | 3.99198515790495  | -1.49111112062062 |
| C | 4.39139685781539  | 3.01815927653982  | -1.55497490043090 |
| H | 4.99984048495921  | 2.36222262173677  | -2.18742286370982 |
| H | 3.42176766151296  | 3.16272244739099  | -2.03746232936430 |
| C | 4.64092003278337  | -2.50335024635938 | 2.08786801453422  |
| H | 6.39571389447590  | -1.81837677510537 | 0.06316502174954  |
| H | 6.33264157333768  | -3.58277102766230 | 0.18895580480605  |
| C | 5.77988044705601  | -2.69803573613045 | -0.14716332722697 |
| H | 5.64320710626413  | -2.76868745851965 | -1.23206891142845 |
| H | 3.48845739580761  | -4.08973159712553 | -0.77302647413429 |
| C | 3.67261192969799  | -3.94338022080697 | 0.29744298556729  |
| H | 4.28029535990490  | -4.78246195634252 | 0.65180414423331  |
| H | -6.93295046970764 | 0.13147836113477  | -1.12519280984611 |
| H | -7.78883169853446 | -1.48213916871840 | 0.55239168570050  |
| C | -0.85176316558735 | 1.67130411491573  | 0.09068265468855  |
| O | -2.12253687086632 | 0.93359881236399  | -0.00480569415155 |
| C | -1.14879668715020 | 3.10341869875128  | 0.36029485734777  |
| H | -2.64569965932096 | 3.27978706978970  | -1.18584059397100 |
| C | -0.63927481040752 | 5.13835322536289  | 1.56077357729831  |
| C | -2.29970022377029 | 5.15549312824669  | -0.19042229079480 |
| H | 0.29235319842223  | 3.23611074629293  | 1.95489963202693  |
| C | -0.42971605494655 | 3.77884382657801  | 1.34983415529964  |
| C | -1.57602953282893 | 5.82743218614372  | 0.79411007791562  |
| H | -3.03153953341501 | 5.69086465630492  | -0.78848346941466 |
| C | -2.08339189189468 | 3.80075689361393  | -0.41519092727682 |
| H | -0.07730515236666 | 5.65718861102129  | 2.33206583791392  |
| H | -1.74470019683245 | 6.88693056081544  | 0.96435079430177  |
| H | -0.22231728211506 | 1.23032570355713  | 0.87461323963909  |

**P-phosphanyldiazaphospholenes 1 (Burck et al.)<sup>25</sup>**

E[a.u.] (r<sup>2</sup>-SCAN-3c-CPCM(CH<sub>2</sub>Cl<sub>2</sub>): -2031.766578331837

Gibbs free energy correction (kcal mol<sup>-1</sup>): 381.63

E[a.u.] (PW6B95-D4/def2-QZVPP-SMD(CH<sub>2</sub>Cl<sub>2</sub>): -2035.217076104960

|   |                   |                   |                   |
|---|-------------------|-------------------|-------------------|
| C | -3.56669774329898 | 0.85778542853530  | -0.56228966956985 |
| N | -3.39494330019076 | -0.39615908116266 | 0.04948016542401  |
| P | -2.07671306372284 | -0.40531450360613 | 1.16985814287391  |
| C | -2.54659933406831 | 1.69295696629900  | -0.30826760942218 |
| H | -4.41142318294507 | 1.03349882307138  | -1.21408671344586 |
| N | -1.56408266667624 | 1.11131703208682  | 0.51123196385982  |

|   |                   |                   |                   |
|---|-------------------|-------------------|-------------------|
| C | -4.26190157536628 | -1.49778039426422 | -0.20245568937408 |
| H | -2.39467267279532 | 2.68206063934700  | -0.71767422811335 |
| C | -0.32357281427226 | 1.75137025762910  | 0.79672072356175  |
| C | -3.73951657995398 | -2.66960121979898 | -0.77995059861863 |
| C | -5.95531281234716 | -3.68546511926261 | -0.66812603704178 |
| C | -6.86535184656878 | -4.85283614835762 | -0.93791431817318 |
| C | -5.62576387186693 | -1.40323575253513 | 0.12950747117141  |
| C | -6.20244870488371 | -0.17180716045906 | 0.77276489184700  |
| H | -7.50098677632890 | -2.43918185922420 | 0.15368283493882  |
| C | -6.44849925221660 | -2.50382577524834 | -0.11636909687771 |
| C | -4.59901082058029 | -3.74777753507012 | -0.99041370479170 |
| C | -2.29389120466657 | -2.77685827115188 | -1.17838840067972 |
| H | -4.19745374911616 | -4.65754456324763 | -1.43318449874686 |
| H | -1.94042788836462 | -1.85033320959247 | -1.64263713196290 |
| H | -1.64943081236769 | -2.96420448085310 | -0.31070750972285 |
| H | -2.15498389514130 | -3.60108539370311 | -1.88290515230526 |
| H | -5.50684596986029 | 0.26884505510678  | 1.49415272460356  |
| H | -6.42750786352895 | 0.60389885129877  | 0.03085367827699  |
| H | -7.13469517063308 | -0.41673716220053 | 1.28838715155421  |
| C | 2.12676422646042  | 3.00099946357127  | 1.35521587748033  |
| C | -0.31298872987529 | 3.01523768192780  | 1.41375961493055  |
| C | 2.08448072890407  | 1.75645323620742  | 0.72702911043026  |
| H | 0.92852231801390  | 4.58961272579056  | 2.16519717562419  |
| C | 0.91835957010986  | 3.61726393053774  | 1.67541898645176  |
| C | 3.43943279945630  | 3.64468614492842  | 1.70980475397130  |
| C | -1.57792658331136 | 3.73117660609808  | 1.79966031424481  |
| C | 0.87924396233574  | 1.12056922994363  | 0.42828006203124  |
| C | 0.89387165866697  | -0.20304345392970 | -0.28461977872610 |
| H | 3.01622521815264  | 1.26947388158011  | 0.44459439487783  |
| H | 1.86472020055221  | -0.36629628008641 | -0.76001126218973 |
| H | 0.71473458330139  | -1.03634133816093 | 0.40635194008471  |
| H | 0.11258910449383  | -0.25249078792644 | -1.05048413628748 |
| H | -2.36991259362412 | 3.03443133948090  | 2.08629498101923  |
| H | -1.38691428001659 | 4.40446026406064  | 2.63950220777923  |
| H | -1.96169719012762 | 4.33759680134379  | 0.96965553412331  |
| P | -3.05623471073010 | 0.24432039300391  | 3.27967610227910  |
| C | -3.21402808739225 | -1.47668257538528 | 3.90814232162706  |
| C | -1.45615443032754 | 0.77524234339579  | 4.01887382584383  |
| C | -0.19792830282418 | 2.48912713198184  | 5.19174485195411  |
| C | 0.92117674798663  | 0.49538683364897  | 4.42908572020157  |
| H | -2.30080385270456 | 2.61256243396971  | 4.76266664532656  |
| C | -1.39734503624746 | 2.01503772113064  | 4.66794371902655  |
| C | 0.96533577420273  | 1.73291059002824  | 5.06959361757584  |
| H | -0.17243557330798 | 3.45147315639923  | 5.69609159204932  |

---

|   |                   |                   |                   |
|---|-------------------|-------------------|-------------------|
| C | -0.27851490295704 | 0.01796030843920  | 3.91133344777167  |
| H | -0.30194379508398 | -0.95791593709367 | 3.43248916051914  |
| H | 1.82465195615007  | -0.10097010135210 | 4.33220482113673  |
| H | 1.90299834453741  | 2.10392548703326  | 5.47467748199068  |
| C | -2.61310387826053 | -1.91782341604588 | 5.09712245176236  |
| C | -2.81737030732323 | -3.21482896985440 | 5.55792924964209  |
| H | -1.98185934433121 | -1.24289087325727 | 5.66814844977190  |
| H | -3.77429879863120 | -5.11639743841094 | 5.20535302125425  |
| C | -3.62105148700450 | -4.10341247540084 | 4.84389683085365  |
| C | -4.22835401971792 | -3.67615723521406 | 3.66551096280620  |
| C | -4.03198374582207 | -2.37666528182940 | 3.20588314193924  |
| H | -2.34407260114287 | -3.53322642995634 | 6.48330171660956  |
| H | -4.53072883910576 | -2.06342607525716 | 2.29209121365878  |
| H | -4.86137501061672 | -4.35362902174063 | 3.09783681134380  |
| H | 4.23574729507859  | 3.32412620381997  | 1.03156064099522  |
| H | 3.36973484727787  | 4.73610218646362  | 1.67707015560523  |
| H | 3.74293046014274  | 3.36662725878034  | 2.72742857086279  |
| H | -7.74652847200118 | -4.82608430103522 | -0.29057826898501 |
| H | -7.21805089444395 | -4.83770195833509 | -1.97680386906599 |
| H | -6.34666475713096 | -5.80392382692966 | -0.78393155146732 |

**P-phosphanyldiazaphospholenes 2 (Burck et al.)<sup>25</sup>**

E[a.u.] (r<sup>2</sup>-SCAN-3c-CPCM(CH<sub>2</sub>Cl<sub>2</sub>): -2037.760036195814

Gibbs free energy correction (kcal mol<sup>-1</sup>): 453.10

E[a.u.] (PW6B95-D4/def2-QZVPP-SMD(CH<sub>2</sub>Cl<sub>2</sub>): -2041.237072849063

|   |                   |                   |                   |
|---|-------------------|-------------------|-------------------|
| C | -3.29688521886912 | 0.67612727308060  | -0.97949174652568 |
| N | -3.42125603603989 | -0.23615214560205 | 0.06559350871459  |
| P | -2.43141403795442 | 0.09431087330190  | 1.44350429240515  |
| C | -2.33395704220750 | 1.58362958648633  | -0.73496207647325 |
| H | -3.91583227669140 | 0.58388015903915  | -1.86242271309078 |
| N | -1.71663234023571 | 1.36700116227560  | 0.49858085686441  |
| C | -4.27949080582873 | -1.37471292320698 | -0.04901674781176 |
| H | -2.00187287929866 | 2.38363776284112  | -1.38184194478387 |
| C | -0.62647334780783 | 2.18112834785731  | 0.93148219699236  |
| C | -3.71450416094591 | -2.61925691258424 | -0.36334378532093 |
| C | -5.94757410175426 | -3.59544559098478 | -0.33045337880699 |
| C | -6.84214275351699 | -4.80045867584196 | -0.42975379741349 |
| C | -5.66331191852484 | -1.21464463130836 | 0.10658640222298  |
| C | -6.25894408606927 | 0.13267551606793  | 0.40324821686490  |
| H | -7.55250298665423 | -2.22754502518860 | 0.09100101200764  |
| C | -6.47720644115575 | -2.33829249419144 | -0.03616143610373 |
| C | -4.56775660857867 | -3.71530827429469 | -0.49951302258951 |
| C | -2.23094467290852 | -2.77728834300145 | -0.54839272153580 |

|   |                   |                   |                   |
|---|-------------------|-------------------|-------------------|
| H | -4.14127026331954 | -4.68637430319086 | -0.74352938214560 |
| H | -1.82310811139002 | -1.99426790772242 | -1.19662767172612 |
| H | -1.70315076942753 | -2.70438932150810 | 0.41071401044739  |
| H | -2.00132139623762 | -3.75182102937676 | -0.98641457993802 |
| H | -5.70924906121100 | 0.64485174214075  | 1.19969826571538  |
| H | -6.22184550519766 | 0.78359428195924  | -0.47899024217565 |
| H | -7.30461281339551 | 0.03256623939180  | 0.70498188602630  |
| C | 1.52043094193430  | 3.79006473428998  | 1.74890000813311  |
| C | -0.79446471558283 | 3.57559825725133  | 1.01240555619675  |
| C | 1.65270143340055  | 2.40493931440480  | 1.67012128997413  |
| H | 0.15729362103420  | 5.43186816175498  | 1.49265708647487  |
| C | 0.29007564744675  | 4.35435222193259  | 1.41235582624151  |
| C | 2.67775243313936  | 4.65725090817198  | 2.16329208349446  |
| C | -2.11946698633977 | 4.24017366873278  | 0.74656967258758  |
| C | 0.60329944998803  | 1.58212509965202  | 1.25515490640575  |
| C | 0.82802371848563  | 0.09805668529240  | 1.15726036718773  |
| H | 2.60555404184684  | 1.94495670901854  | 1.92503324728055  |
| H | 1.89861794260919  | -0.11779061148578 | 1.10679774163308  |
| H | 0.41983391644122  | -0.42670014929456 | 2.02999990990586  |
| H | 0.34087256965453  | -0.32600801377781 | 0.27294897500196  |
| H | -2.95777884680516 | 3.60325749555117  | 1.04549213492323  |
| H | -2.18106949307842 | 5.18172385354104  | 1.29919408271009  |
| H | -2.25339191695816 | 4.47451624341410  | -0.31614092539694 |
| P | -3.85671056387901 | 0.99146559499731  | 3.41689998441183  |
| C | -2.54139813913474 | -1.02977377845488 | 4.45538861094808  |
| C | -0.24566040344801 | -0.00563542243958 | 5.07509591564227  |
| C | -1.63758682500634 | 0.09995332852746  | 4.50168572238118  |
| C | -2.12283949028249 | -2.39055387758887 | 4.95287750639445  |
| C | -2.19583404917746 | 1.27953075309107  | 4.04161715611899  |
| C | -1.60268229515650 | 2.65553281746694  | 4.13852201996131  |
| C | -5.00560519899710 | -1.62406364711420 | 3.86795309558011  |
| C | -3.78790423632761 | -0.73091268250167 | 3.93299809736712  |
| C | -2.09912450774075 | 3.42314906419296  | 5.37490495470885  |
| H | -0.50598656533352 | 2.60648294729823  | 4.14938396877089  |
| H | -1.87284021114677 | 3.23836528845471  | 3.25325668450544  |
| H | -1.85557571631195 | 2.89209897909241  | 6.30010164783383  |
| H | -1.64414609109217 | 4.41960308278533  | 5.42030763738494  |
| H | -3.18710509306650 | 3.54486362619721  | 5.33677200864943  |
| C | -0.18661084916610 | 0.22844736019222  | 6.59250737657890  |
| H | 0.16829559066681  | -0.99586359521477 | 4.85232203292474  |
| H | 0.41153320918486  | 0.71757465711171  | 4.57648880571949  |
| H | -0.85988017341500 | -0.45321891017855 | 7.12333993510876  |
| H | 0.82870240368581  | 0.06923823800774  | 6.97265136470319  |
| H | -0.48530103352782 | 1.25078058013397  | 6.84152718587247  |



---

|   |                   |                   |                   |
|---|-------------------|-------------------|-------------------|
| H | -1.46227990059328 | -2.28045992276993 | 5.82172236726380  |
| H | -3.00191044141980 | -2.93944611598115 | 5.30831010726681  |
| C | -1.39480273227564 | -3.22067036298004 | 3.88303199344502  |
| H | -0.49078352435829 | -2.70680387601831 | 3.53853941295349  |
| H | -1.10119981231595 | -4.20064302442297 | 4.27680021001601  |
| H | -2.03644300399891 | -3.37555784561651 | 3.01005948035434  |
| H | -5.80930708985416 | -1.06536636255808 | 3.37040664491134  |
| C | -4.86196742513198 | -2.98108219284914 | 3.16826605261573  |
| H | -5.36343337864621 | -1.79642303790963 | 4.89536951088066  |
| H | -4.43843489894093 | -2.86148110892021 | 2.16807932105543  |
| H | -4.22579255719708 | -3.67079110227118 | 3.72768987969399  |
| H | -5.84628834261928 | -3.45111412580297 | 3.06040213232047  |
| H | 3.40035491981662  | 4.09551389332735  | 2.76189994494603  |
| H | 3.20650504863181  | 5.04466703065805  | 1.28344107172217  |
| H | 2.33750950730928  | 5.52013928930616  | 2.74400476688546  |
| H | -7.83322168919080 | -4.53019349456759 | -0.80593894440437 |
| H | -6.41221927459792 | -5.56215057647876 | -1.08653544309686 |
| H | -6.98018966394064 | -5.25752993309041 | 0.55836524503048  |

---

## 11. References

1. D. L. J. Broere, L. L. Metz, B. de Bruin, J. N. H. Reek, M. A. Siegler and J. I. van der Vlugt, *Angew. Chem. Int. Ed.*, 2015, **54**, 1516-1520.
2. D. Roth, A. T. Radosevich and L. Greb, *J. Am. Chem. Soc.*, 2023, **145**, 24184-24190.
3. I. Krossing, *Chem. – Eur. J.*, 2001, **7**, 490-502.
4. L. Falivene, Z. Cao, A. Petta, L. Serra, A. Poater, R. Oliva, V. Scarano and L. Cavallo, *Nat. Chem.*, 2019, **11**, 872-879.
5. L. Krause, R. Herbst-Irmer, G. M. Sheldrick and D. Stalke, *J. Appl. Crystallogr.*, 2015, **48**, 3-10.
6. G. M. Sheldrick, *Acta Crystallogr. A: Found. Adv.*, 2015, **71**, 3-8.
7. G. M. Sheldrick, *Acta Crystallogr. C: Struct. Chem.*, 2015, **71**, 3-8.
8. C. R. Groom, I. J. Bruno, M. P. Lightfoot and S. C. Ward, *Acta Crystallogr. B B: Struct. Sci. Cryst. Eng. Mater.*, 2016, **72**, 171-179.
9. D. Kratzert, *FinalCif*, <https://dkratzert.de/finalcif.html>, (last accessed 16 January 2024).
10. A. D. Gorman, J. A. Cross, R. A. Doyle, T. R. Leonard, P. G. Pringle and H. A. Sparkes, *Eur. J. Inorg. Chem.*, 2019, **2019**, 1633-1639.
11. F. Neese, *WIREs Computational Molecular Science*, 2012, **2**, 73-78.
12. F. Neese, *WIREs Computational Molecular Science*, 2018, **8**, e1327.
13. F. Neese, F. Wennmohs, A. Hansen and U. Becker, *Chem. Phys.*, 2009, **356**, 98-109.
14. K. Eichkorn, O. Treutler, H. Öhm, M. Häser and R. Ahlrichs, *Chem. Phys. Lett.*, 1995, **242**, 652-660.
15. K. Eichkorn, F. Weigend, O. Treutler and R. Ahlrichs, *Theor. Chem. Acc.*, 1997, **97**, 119-124.
16. C. Y. Legault, *CYLview20 2020*, *Université de Sherbrooke*.
17. S. Grimme, A. Hansen, S. Ehlert and J.-M. Mewes, *J. Chem. Phys.*, 2021, **154**, 064103.
18. S. Grimme, *Chem. Eur. J.*, 2012, **18**, 9955-9964.
19. C. Bannwarth, E. Caldeweyher, S. Ehlert, A. Hansen, P. Pracht, J. Seibert, S. Spicher and S. Grimme, *WIREs Computational Molecular Science*, 2021, **11**, e1493.
20. P. Pracht, F. Bohle and S. Grimme, *Phys. Chem. Chem. Phys.*, 2020, **22**, 7169-7192.
21. A. V. Marenich, C. J. Cramer and D. G. Truhlar, *J. Phys. Chem. B*, 2009, **113**, 6378-6396.
22. Y. Zhao and D. G. Truhlar, *J. Phys. Chem. A*, 2005, **109**, 5656-5667.
23. E. Caldeweyher, S. Ehlert, A. Hansen, H. Neugebauer, S. Spicher, C. Bannwarth and S. Grimme, *J. Chem. Phys.*, 2019, **150**, 154122.
24. E. D. Glendening, C. R. Landis and F. Weinhold, *J. Comput. Chem.*, 2013, **34**, 1429-1437.
25. S. Burck, D. Gudat and M. Nieger, *Angew. Chem. Int. Ed.*, 2004, **43**, 4801-4804.
